# Supplementary material
Source: publisher site journal article supplement (https://www.dovepress.com/article/440195)
Supplement: Supplementary file 2 [file 440195-revised-supplementary-material-S1-Spanish.pdf › 440195-revised-supplementary-material-S1-Spanish.pdf]

## TEST DE CONOCIMIENTOS SOBRE ALIMENTACIÓN SALUDABLE

### INSTRUCCIONES:

Lea detenidamente cada una de las preguntas y marque con un aspa (X) lo que Ud. considere correcto.

#### DATOS

Nombre y apellidos: .....

Edad: ..... SEXO: ( M ) ( F )

#### I. CONTENIDOS

##### 1. ¿Cuántas veces se debe comer al día?

- a. Dos veces
- b. Tres
- c. Cinco
- d. Cuando tenga hambre

##### 2. ¿Cuántos vasos de agua debe beber al día una persona?

- a. 3 vasos
- b. 6 vasos
- c. 8 vasos

##### 3. ¿Qué comida considera la más importante dentro de tu alimentación?

- a. Desayuno
- b. Almuerzo
- c. Cena
- d. Ay b

##### 4. ¿Un plato saludable es el que contiene?

- a. Proteínas, carbohidratos y verduras
- b. Frutas y verduras más del 50%
- c. 50% vegetales, 25% de proteínas y 25% carbohidratos.
- d. Agua, verduras y frutas

##### 5. ¿Cuál es la función del grupo de leche, yogurt y quesos?

- a. Estructura ósea, transmisión del impulso nervioso y construcción muscular.
- b. Aportar vitaminas, aminoácidos y minerales.
- c. Formar músculos
- d. Favorecer el funcionamiento intestinal

##### 6. ¿Cuál es la función de las carnes?

- a. Aportan vitaminas, aminoácidos y minerales.
- b. Plástica y estructural porque forman parte de los órganos y tejidos de organismos.
- c. Favorecer el funcionamiento intestinal
- d. No la conozco

##### 7. ¿Cuál es la función de las frutas?

- a. Formar músculo
- b. Favorecer el funcionamiento intestinal
- c. Función antioxidante, limpiar los radicales libres.
- d. No las conozco

##### 8. ¿Cuál es la función de los vegetales?

- a. Actúa como coenzima.
- b. Favorecer el crecimiento
- c. Aportan vitaminas, aminoácidos y minerales.
- d. No las conozco

##### 9. ¿La pirámide nutricional contiene?

- a. Proteínas, grasas, frutas, verduras y carbohidratos
- b. Minerales, frutas y verduras
- c. Proteínas, aminoácidos y frutas
- d. Todos los anteriores.

##### 10. ¿La vitamina C (naranja, limón) favorece a la absorción de hierro?

- a. SI ( )
- b NO ( )

##### 11. ¿Qué grasa no debes consumir en exceso?

- a. Grasas insaturadas

- b. Grasas saturadas
- c. Grasas totales
- d. No conoce

##### 12. ¿Porque es importante el consumo de fibra?

- a. Previene enfermedades
- b. Es de bajo costo
- c. Facilita el tránsito intestinal
- d. Evita subir de peso

##### 13. ¿Cuántas porciones de frutas y verduras debes consumir diariamente?

- a. Uno al día.
- b. Más de uno
- c. Cinco
- d. No conozco

##### 14. ¿Cuál es el lugar ideal para consumir tus alimentos?

- a. Casa
- b. Ambulante
- c. Kiosco
- d. Restaurante

##### 15. ¿La información referida a temas de alimentación lo debe obtener de:

- a. Amigos/as
- b. Nutricionistas
- c. Universidad
- d. Medios de comunicación (revistas, publicidad, TV.)

##### 16. ¿Son alimentos que debes consumir con frecuencia?

| Alimento                        | Si | No |
|---------------------------------|----|----|
| Leche, yogurt y/o queso         |    |    |
| Frutas frescas                  |    |    |
| Ensaladas de verduras           |    |    |
| Pescado                         |    |    |
| Gaseosas/frugos/néctar          |    |    |
| Hamburguesa/pancho/sándwich     |    |    |
| Pizzas                          |    |    |
| Golosinas (chizitos, caramelos) |    |    |

## Índice de Alimentación Saludable – Hace un año

### II. DATOS

Nombre y apellidos:

Edad: ..... SEXO: (M) (F)

### INSTRUCCIONES:

Lea detenidamente cada una de las preguntas y marque con un aspa (X) lo que Ud. considere correcto.

#### Consumo diario:

##### 1. Cereales y derivados

- a) Consumo diario
- b) 3 o más veces a la semana, pero no diario
- c) 1 o 2 veces a la semana
- d) Menor de una vez a la semana
- e) Nunca o casi nunca

##### 2. Verduras y hortalizas

- a) Consumo diario
- b) 3 o más veces a la semana, pero no diario
- c) 1 o 2 veces a la semana
- d) Menor de una vez a la semana
- e) Nunca o casi nunca

##### 3. Frutas

- a) Consumo diario
- b) 3 o más veces a la semana, pero no diario
- c) 1 o 2 veces a la semana
- d) Menor de una vez a la semana
- e) Nunca o casi nunca

##### 4. Leche y derivados

- a) Consumo diario
- b) 3 o más veces a la semana, pero no diario
- c) 1 o 2 veces a la semana
- d) Menor de una vez a la semana
- e) Nunca o casi nunca

#### Consumo semanal

##### 5. Carnes

- a) Consumo diario
- b) 3 o más veces a la semana, pero no diario
- c) 1 o 2 veces a la semana
- d) Menor de una vez a la semana
- e) Nunca o casi nunca

##### 6. Legumbres

- a) Consumo diario
- b) 3 o más veces a la semana, pero no diario
- c) 1 o 2 veces a la semana
- d) Menor de una vez a la semana
- e) Nunca o casi nunca

#### Consumo ocasional

##### 7. Embutidos y fiambres

- a) Nunca o casi nunca
- b) Menor de una vez a la semana
- c) 1 o 2 veces a la semana
- d) 3 o más veces a la semana, pero no diario
- e) Consumo diario

##### 8. Dulces

- a) Nunca o casi nunca
- b) Menor de una vez a la semana
- c) 1 o 2 veces a la semana
- d) 3 o más veces a la semana, pero no diario
- e) Consumo diario

##### 9. Refrescos con azúcar

- a) Nunca o casi nunca
- b) Menor de una vez a la semana
- c) 1 o 2 veces a la semana
- d) 3 o más veces a la semana, pero no diario
- e) Consumo diario

##### 10. Variedad

(2 puntos si cumple cada una de las recomendaciones diarias, 1 punto si cumple cada una las recomendaciones semanales.)

## Índice de Alimentación Saludable – Actualmente

#### Consumo diario:

##### 2. Cereales y derivados

- a) Consumo diario
- b) 3 o más veces a la semana, pero no diario
- c) 1 o 2 veces a la semana
- d) Menor de una vez a la semana
- e) Nunca o casi nunca

##### 2. Verduras y hortalizas

- a) Consumo diario
- b) 3 o más veces a la semana, pero no diario
- c) 1 o 2 veces a la semana
- d) Menor de una vez a la semana
- e) Nunca o casi nunca

##### 3. Frutas

- a) Consumo diario
- b) 3 o más veces a la semana, pero no diario
- c) 1 o 2 veces a la semana
- d) Menor de una vez a la semana
- e) Nunca o casi nunca

##### 4. Leche y derivados

- a) Consumo diario
- b) 3 o más veces a la semana, pero no diario
- c) 1 o 2 veces a la semana
- d) Menor de una vez a la semana
- e) Nunca o casi nunca

#### Consumo semanal

##### 5. Carnes

- a) Consumo diario
- b) 3 o más veces a la semana, pero no diario
- c) 1 o 2 veces a la semana
- d) Menor de una vez a la semana
- e) Nunca o casi nunca

##### 6. Legumbres

- a) Consumo diario
- b) 3 o más veces a la semana, pero no diario
- c) 1 o 2 veces a la semana
- d) Menor de una vez a la semana
- e) Nunca o casi nunca

#### Consumo ocasional

##### 7. Embutidos y fiambres

- a) Nunca o casi nunca
- b) Menor de una vez a la semana
- c) 1 o 2 veces a la semana
- d) 3 o más veces a la semana, pero no diario
- e) Consumo diario

##### 8. Dulces

- a) Nunca o casi nunca
- b) Menor de una vez a la semana
- c) 1 o 2 veces a la semana
- d) 3 o más veces a la semana, pero no diario
- e) Consumo diario

##### 9. Refrescos con azúcar

- a) Nunca o casi nunca
- b) Menor de una vez a la semana
- c) 1 o 2 veces a la semana
- d) 3 o más veces a la semana, pero no diario
- e) Consumo diario

##### 10. Variedad

(2 puntos si cumple cada una de las recomendaciones diarias, 1 punto si cumple cada una las recomendaciones semanales.)
