# Supplementary material
Source: publisher site journal article supplement (https://www.dovepress.com/article/440195)
Supplement: Supplementary file 3 [file 440195-revised-supplementary-material-S2-English.pdf › 440195-revised-supplementary-material-S2-English.pdf]



***Nutrition***

***FLIP CHART***

***TOTAL HEALTH***

***- SINCHICUY***

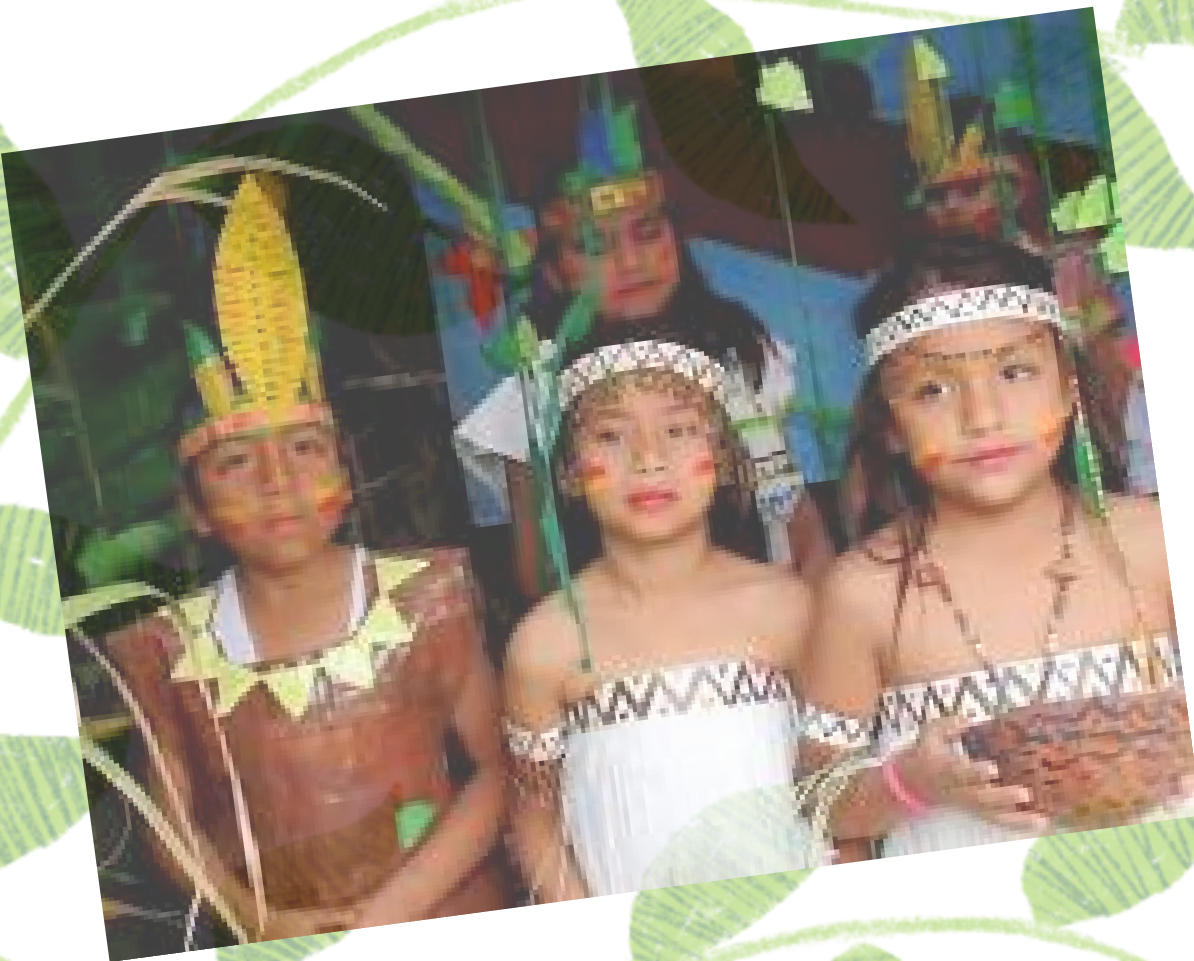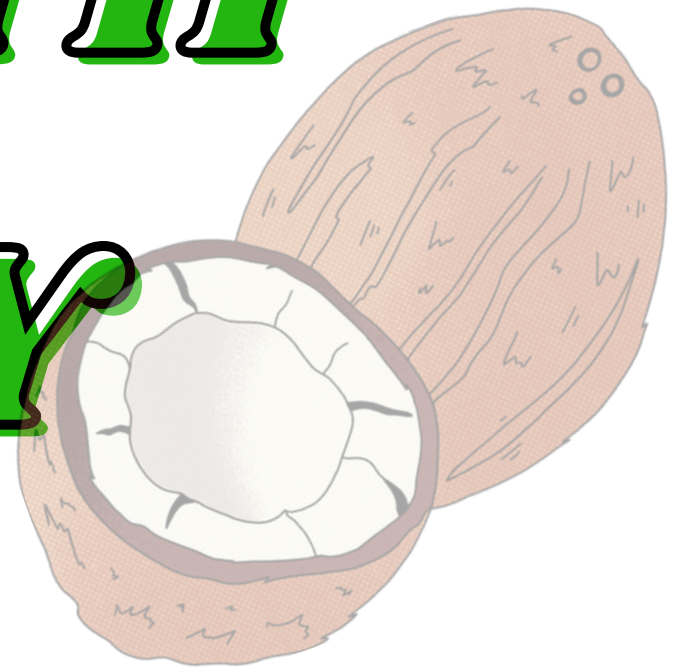

# **Produced by:**

- **Cesia Isabel Toledo Garrido**
- **Yessica Cusquisibán Alcantara**

**2022**

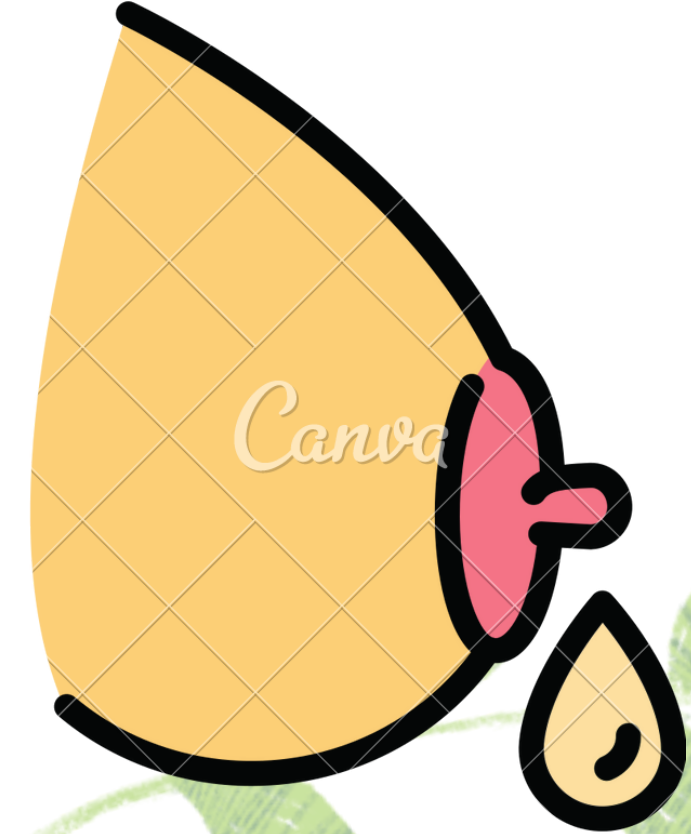

# Breastfeeding

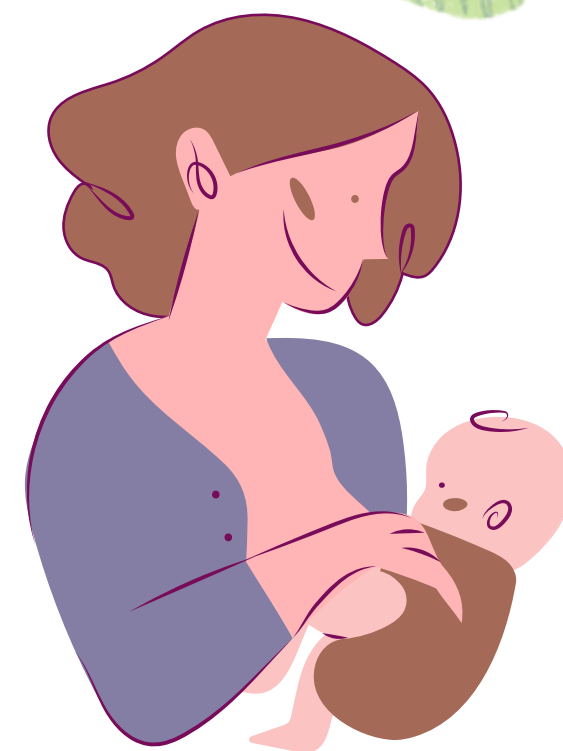



## WHAT IS BREASTFEEDING?

It is a natural act and the ideal way to feed and provide the nutrients that children need from birth, to ensure healthy growth and development.

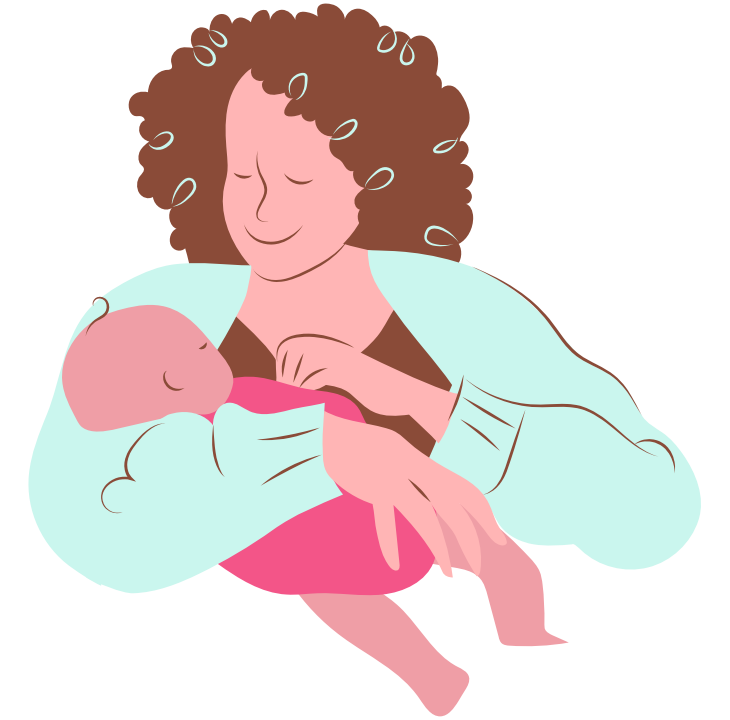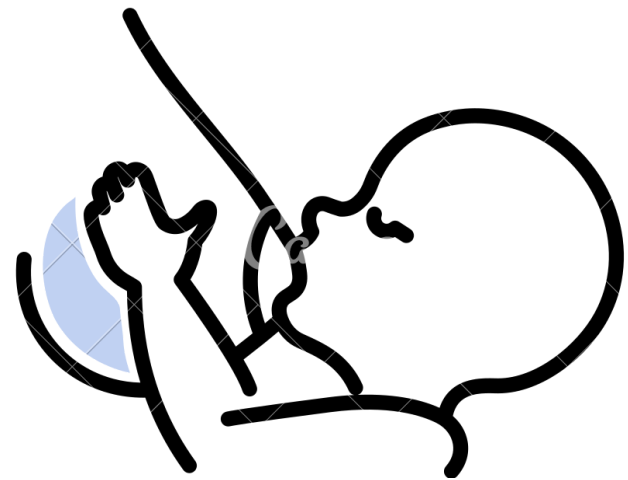

It is the best food you can offer your child. You should give it immediately after birth and exclusively for the first 6 months of life.

## WHAT IS BREAST MILK?

**REMEMBER  
THAT:**

The first breast milk is called colostrum, which prevents your child from many diseases.

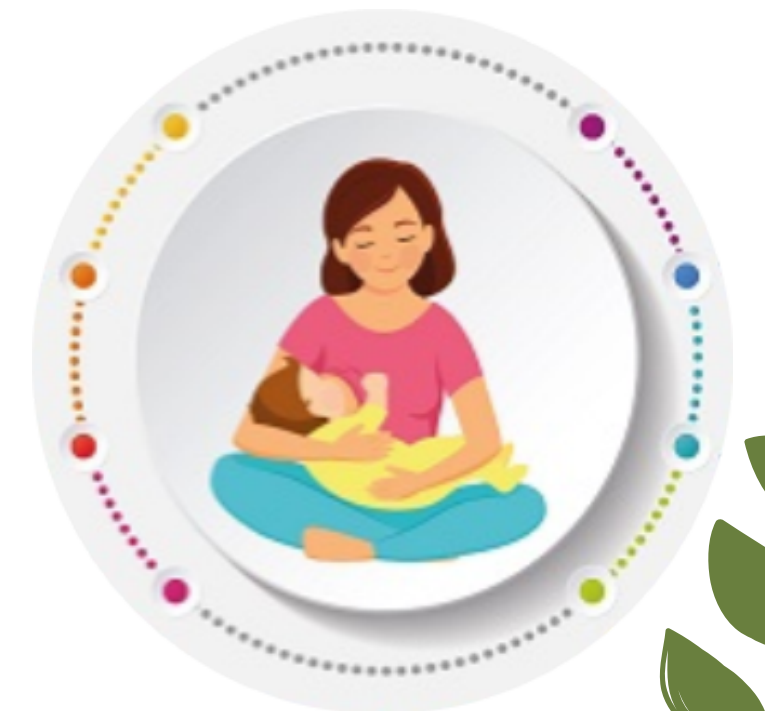

# BENEFITS OF BREASTFEEDING

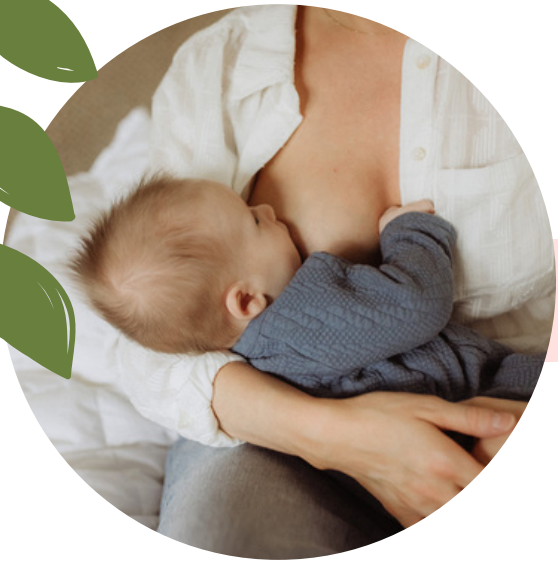

It is easily digestible and free.

Contributes to the formation of tissues and cell membranes.

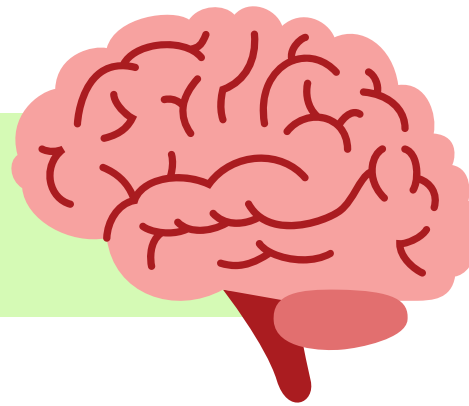

Protect the mother's health.

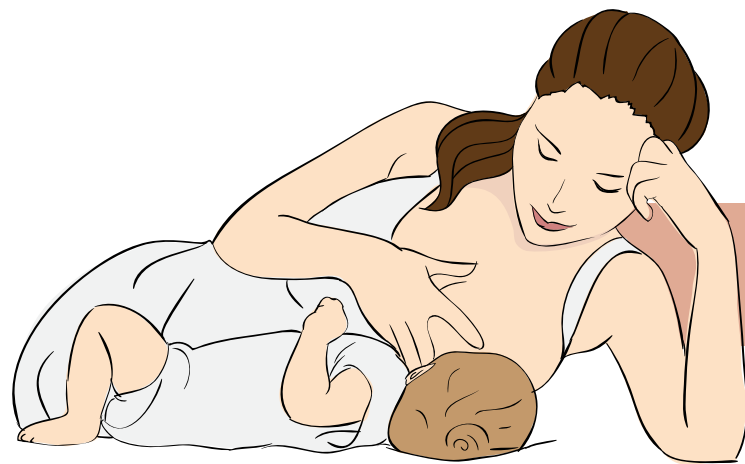

It reduces the risk of breast cancer in women and prevents allergies in children.

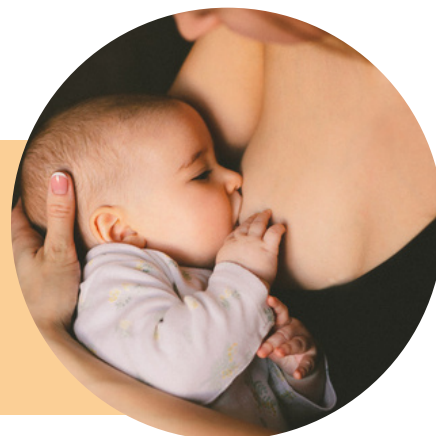

It provides the necessary nutrients and bioactive components that ensure the optimal growth and development of the child.

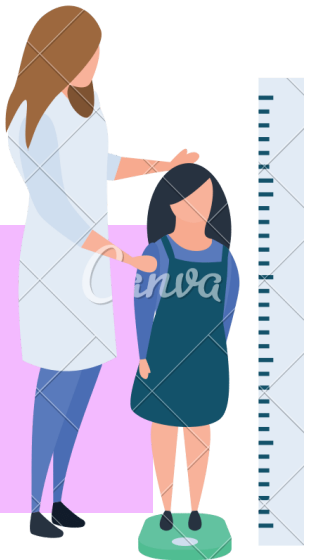

Protects the baby against infections

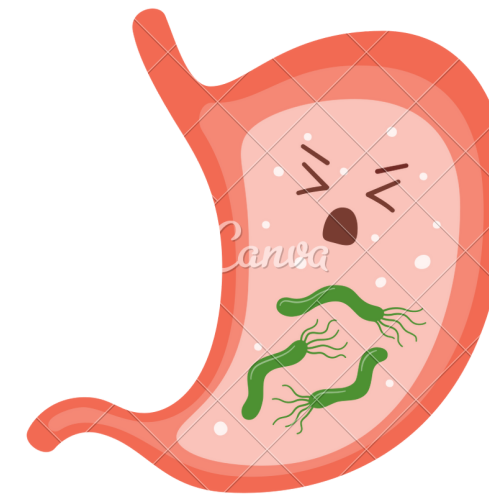

Promotes emotional bonding and emotional development.

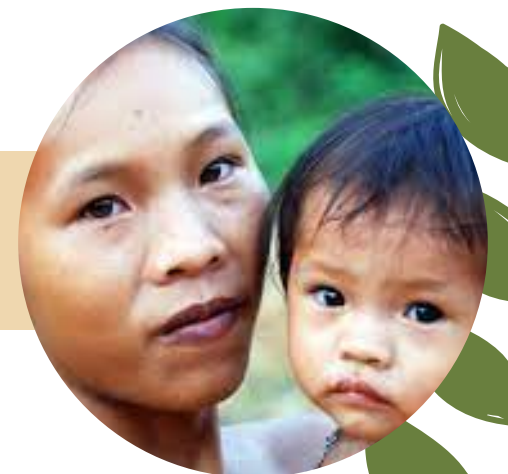

**NUTRITIONAL PROPERTIES OF  
BREASTFEEDING**

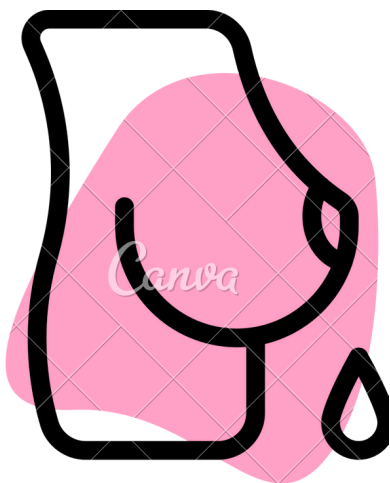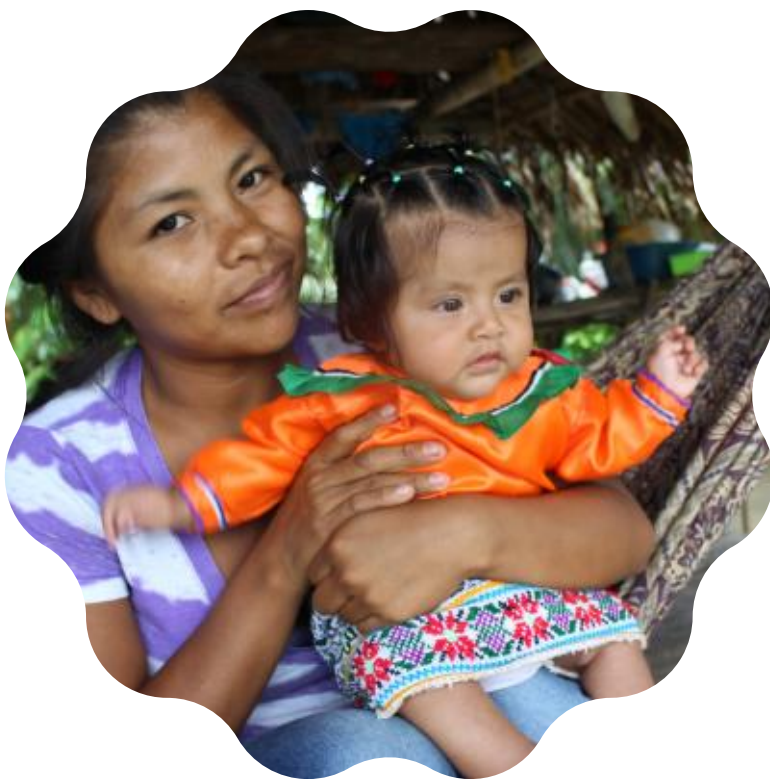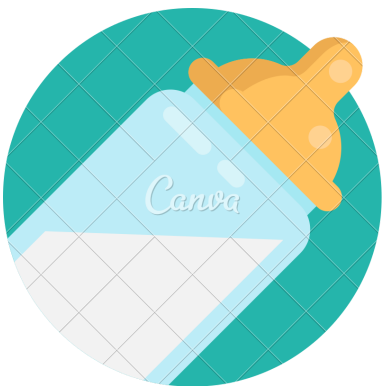

**Milk production  
will be adequate  
as long as the  
child sucks  
frequently.**

| Properties                                  |                                                                                                                                     |
|---------------------------------------------|-------------------------------------------------------------------------------------------------------------------------------------|
| Water                                       | Contribute the amount your child needs                                                                                              |
| Proteins                                    | Easily digestible, it contributes to the formation, growth and development of the baby.                                             |
| Fats                                        | Great source of essential fatty acids (DHA, EPA, ARA) for the development of your child's central nervous system and visual acuity. |
| Provides the necessary energy for your baby |                                                                                                                                     |
| Vitamins and minerals                       | It contains calcium, phosphorus, magnesium, copper, zinc and vitamins such as A, D, E, K, B complex and vitamin C.                  |

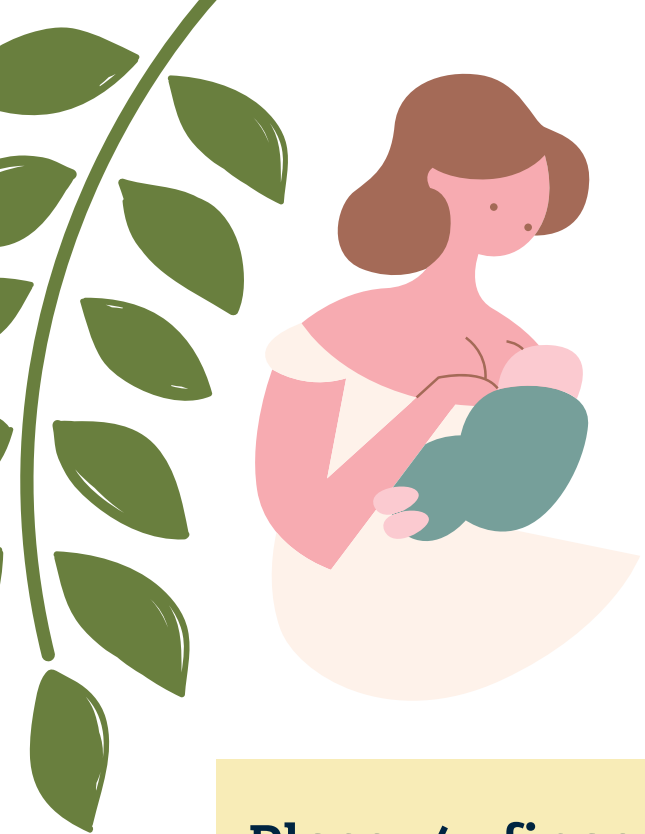

## BREASTFEEDING TECHNIQUE

**Follow these 4 simple steps and  
feed your baby with love**

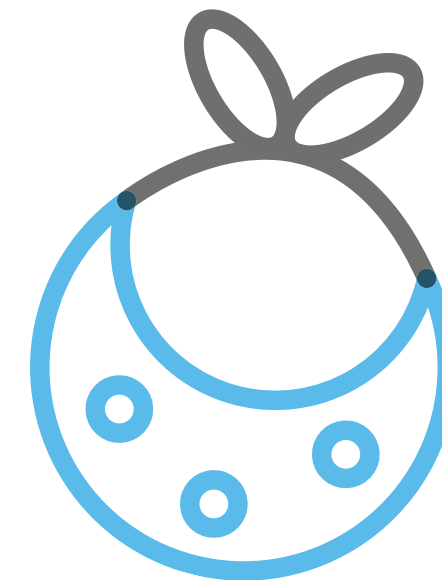

Place 4 fingers under the breast and the thumb above, behind the areola. With your nipple, touch the baby's lower lip until he opens his mouth wide.

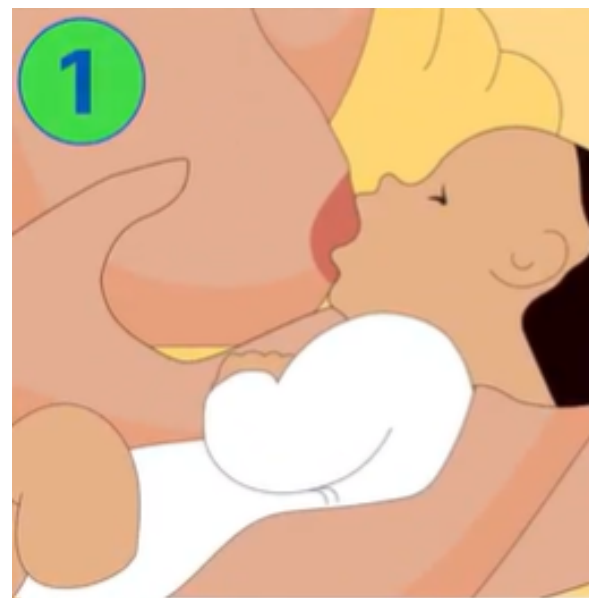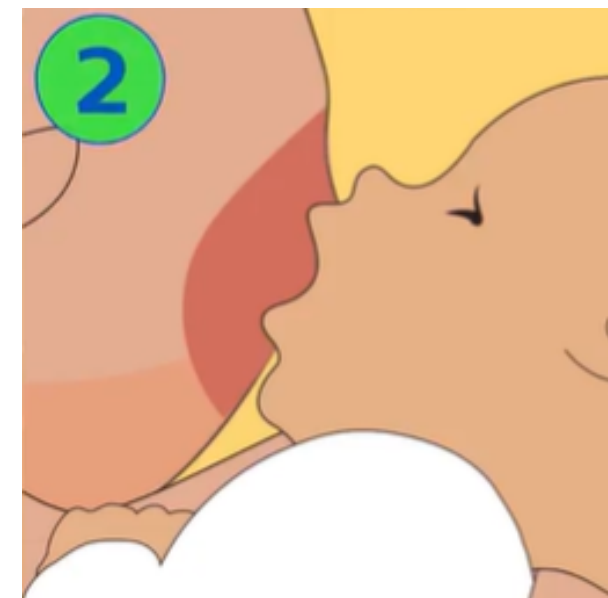

Bring the baby's head closer to your chest, so that the mouth covers the areola. The nose and chin should be in contact with the chest.

The nipple must remain inside the mouth, so that the boy or girl can suck.

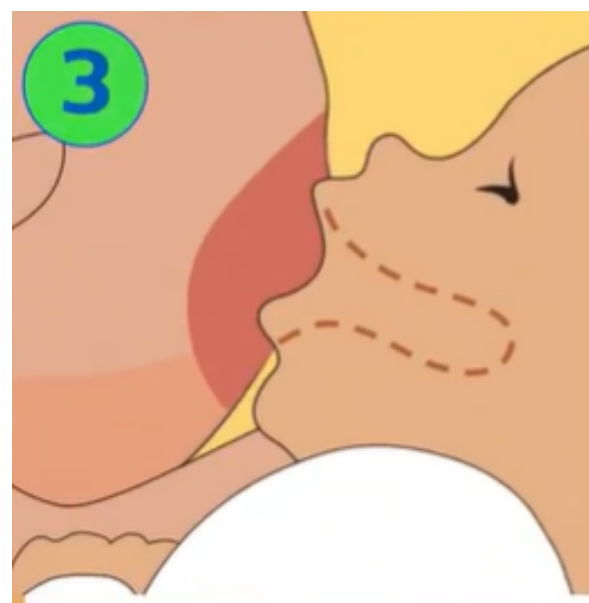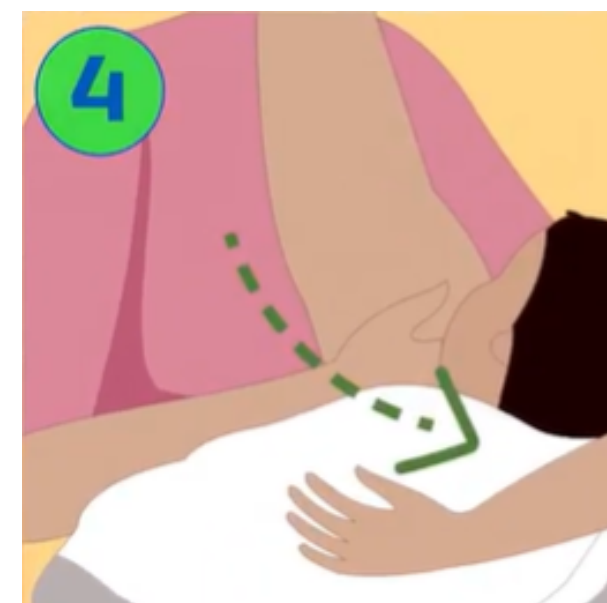

Do not remove your baby from your breast until he or she has finished breastfeeding.

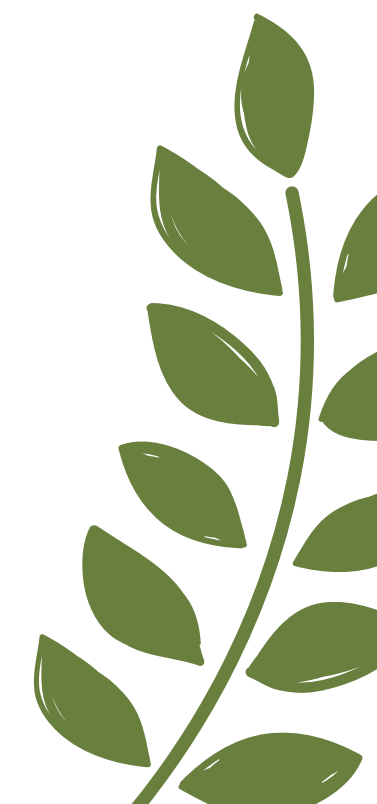

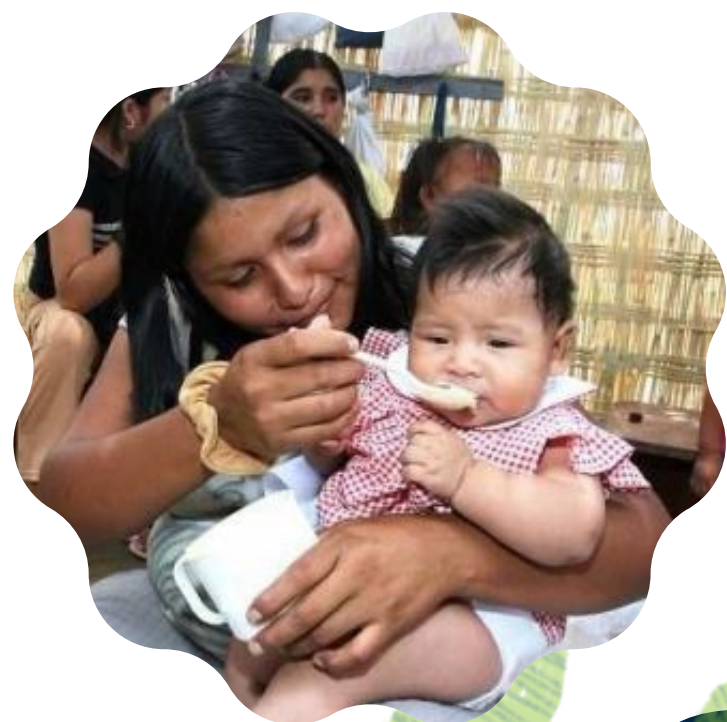

# Supplementary feeding

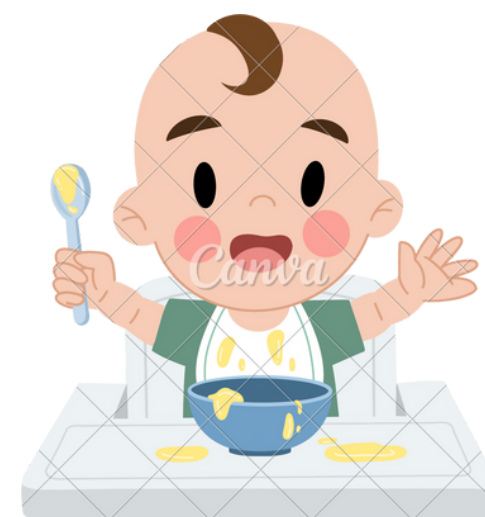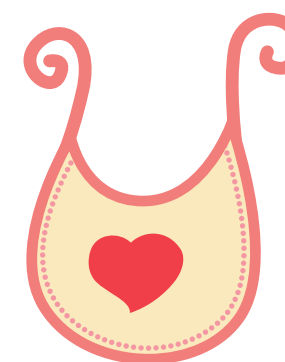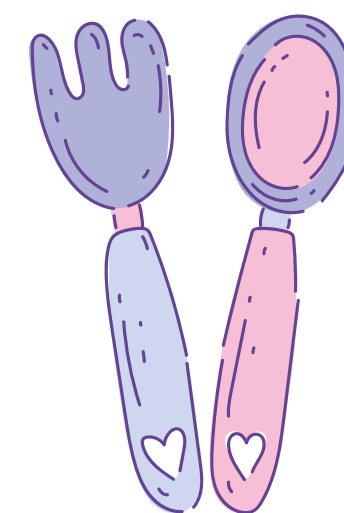

## WHAT IS COMPLEMENTARY FOOD?

It is the process that begins when breast milk alone is no longer sufficient to meet the nutritional needs of the infant, and therefore other foods and liquids are needed in addition to breast milk.

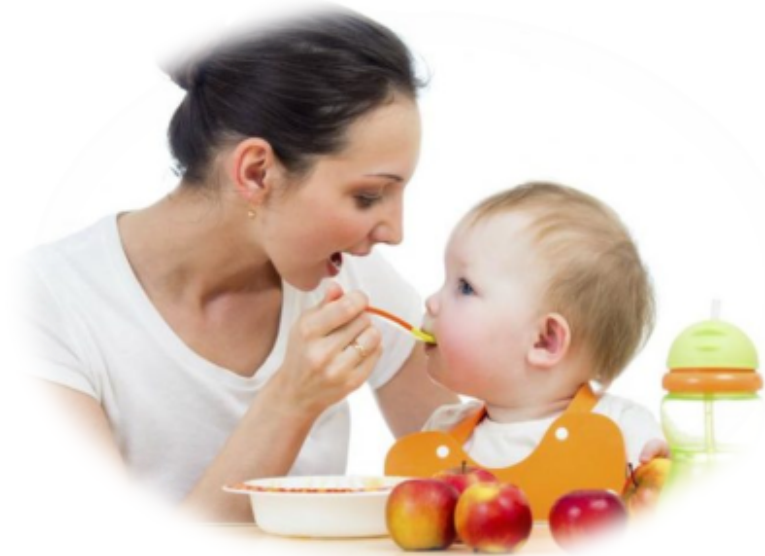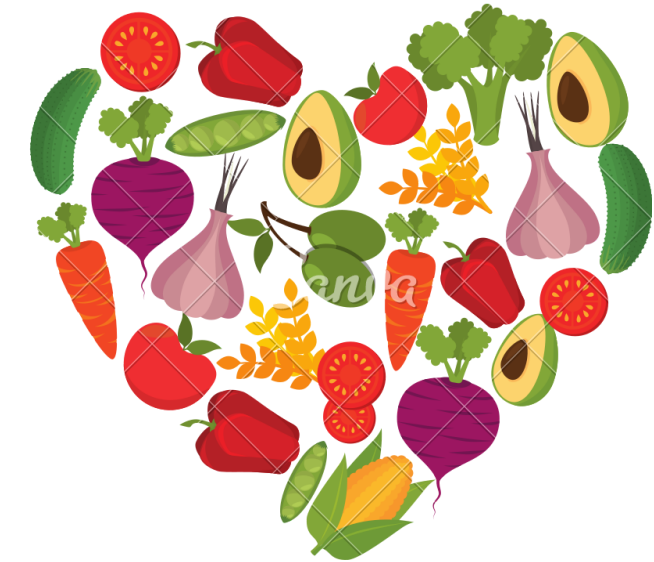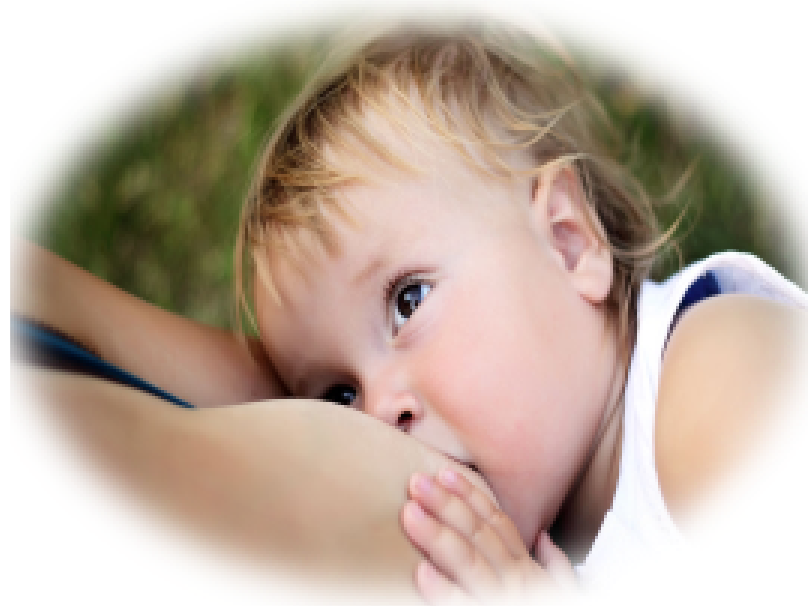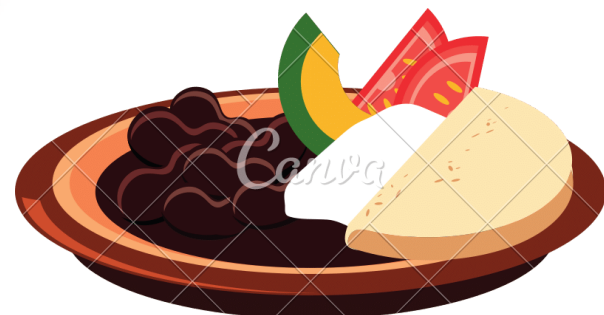

The transition from exclusively breastfeeding to complementary feeding generally covers the period from 6 to 18 to 24 months of age, and is a phase of great vulnerability, when malnutrition begins for many children, and one of the most contributes to the high prevalence of malnutrition in children under 5 years of age around the world.

## WHY START AT 6 MONTHS?

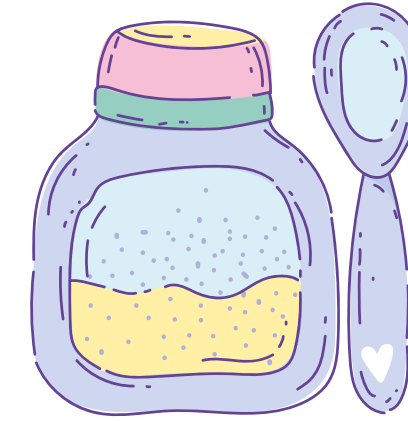

Aspects that facilitate feeding from 6 months:

- It is the age at which your digestive system is mature enough to digest a variety of foods (Your intestine begins to act as a “barrier” to avoid possible infections.
- There is a sufficient amount of enzymes that facilitate digestion and absorption).
- They can make chewing movements up and down.
- They can control their tongue better.
- They like to put objects in their mouth.
- They are interested in new flavors.

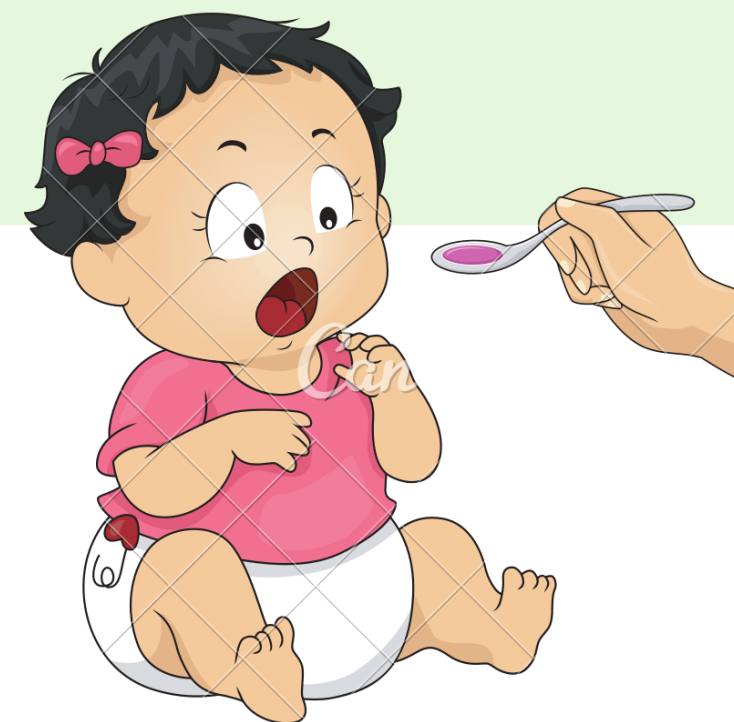

## **RISKS OF EARLY INTRODUCTION**

Short term:

- ❖ Possibility of choking.
- ❖ Increase in acute gastroenteritis and upper respiratory tract infections.
- ❖ Interference with the bioavailability of iron and zinc in breast milk.
- ❖ Replacing milk intake with other less nutritious foods.

Long-term:

- ❖ Greater risk of obesity.
- ❖ Increased risk of atopic eczema.
- ❖ Increased risk of type 1 diabetes mellitus.
- ❖ Higher rate of early weaning, with the added risks that this entails.

## **RISKS OF LATE INTRODUCTION**

- ❖ Nutritional deficiencies, especially iron and zinc.
- ❖ Increased risk of food allergies and intolerances.
- ❖ Worse acceptance of new textures and flavors.
- ❖ Greater possibility of alteration of oral motor skills.

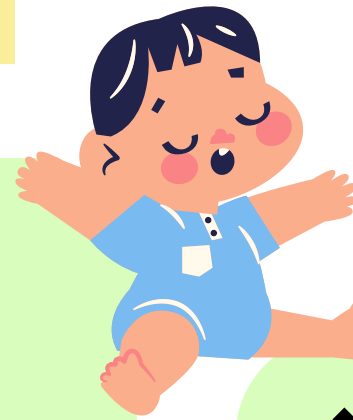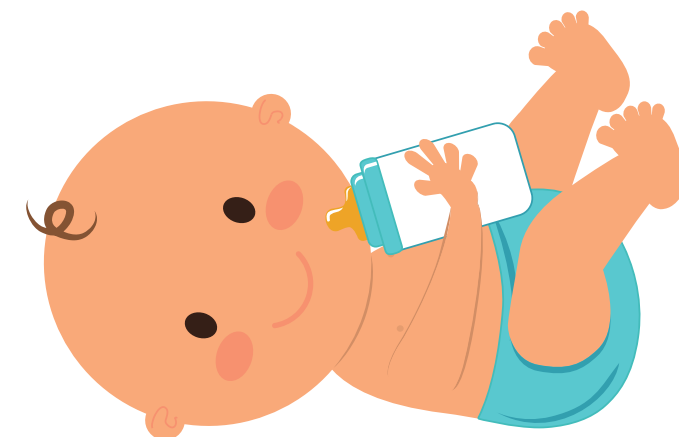

WHAT SHOULD COMPLEMENTARY FEEDING LOOK LIKE?

| Age          | Times per day                                                            | Consistency            | Amount                 |                                                                                                   |
|--------------|--------------------------------------------------------------------------|------------------------|------------------------|---------------------------------------------------------------------------------------------------|
| 6 months     | 2 meals per day.<br>Mid morning, Mid day.                                | Porridges,<br>purees   | 2 to 3<br>tablespoons  |  = 1/4 cup     |
| 7-8 months   | 3 meals per day.<br>Mid-morning, Mid-day, Mid-afternoon                  | Crushed<br>food        | 3 to 5<br>tablespoons  |  = 1/2 cup    |
| 9-11 months  | 4 meals per day.<br>Early, Mid-morning, Mid-day,<br>Mid-afternoon        | Minced<br>food         | 5 to 7<br>tablespoons  |  = 1 cup     |
| 12-24 months | 5 meals per day.<br>Early, Mid-morning, Mid-day,<br>Mid-afternoon, Night | From the<br>family pot | 7 to 10<br>tablespoons |  = 1 1/2 cup |

# 6-8 MESES

Foods of  
animal  
origin

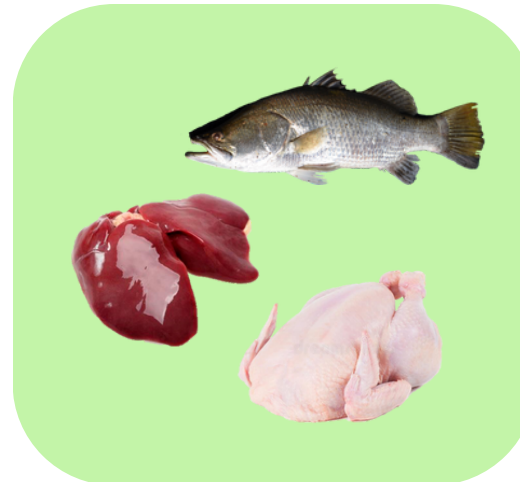

Liver,  
spleen, fish,  
chicken.

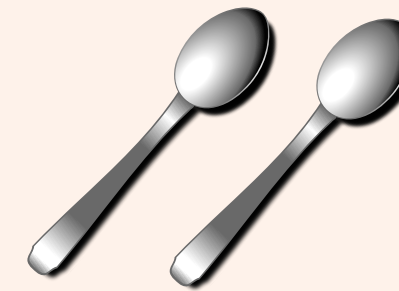

Cereals  
and tubers

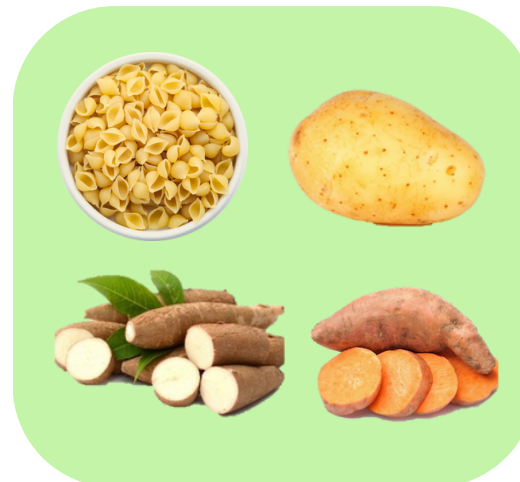

Cassava,  
pituca, potato,  
noodles,  
semolina.

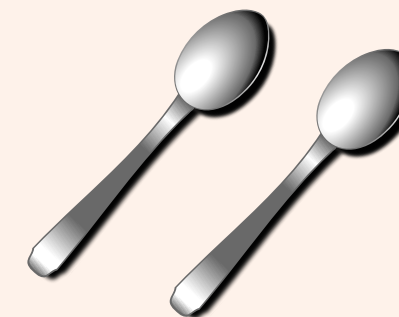

Vegetables

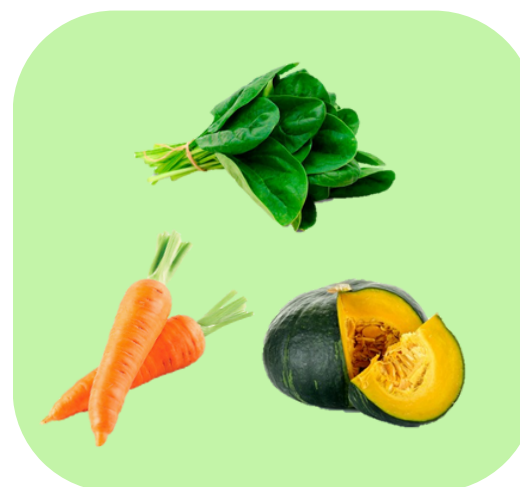

Pumpkin,  
carrot,  
spinach, etc.

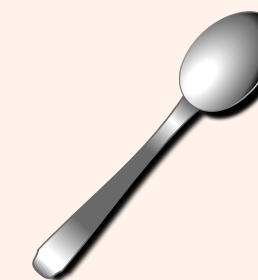

9-11  
MESES

Foods of  
animal  
origin

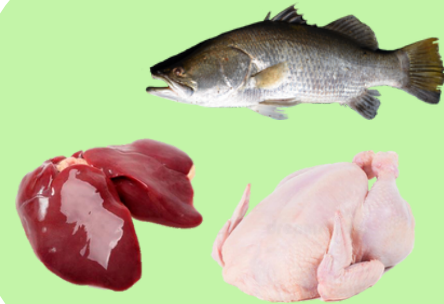

Liver, spleen,  
beef, fish,  
chicken.

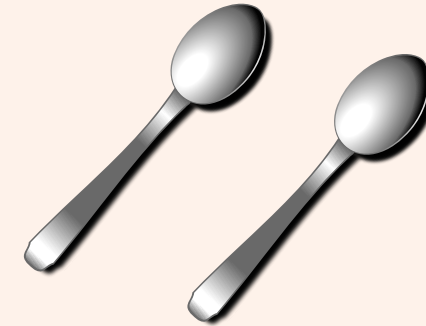

Fats

Cereals and  
tubers

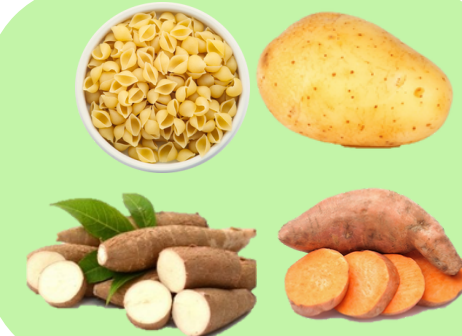

Cassava, sweet  
potato, potato,  
noodles,  
semolina.

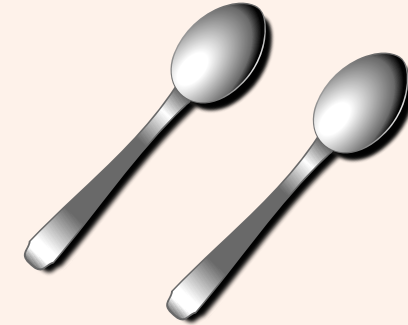

Stews

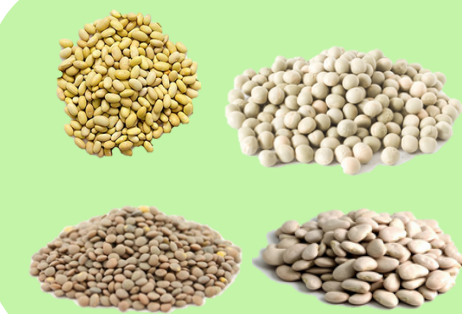

Beans,  
lentils,  
shelled  
palars.

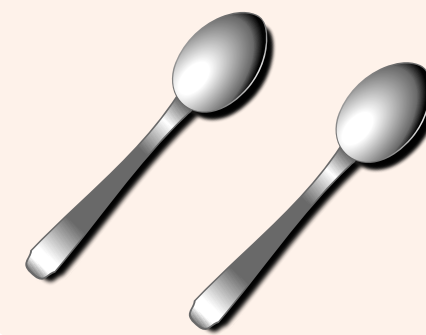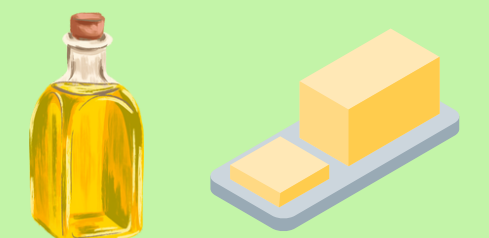

Oil or butter  
in the main  
meal.

Vegetables

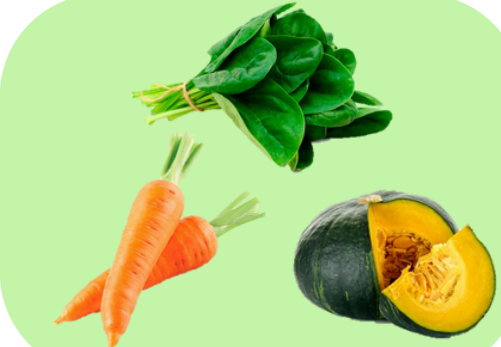

Pumpkin,  
carrot,  
spinach, etc.

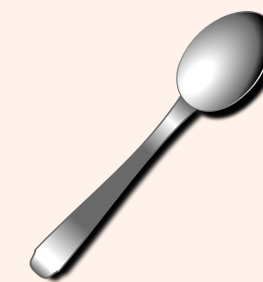

Fruit

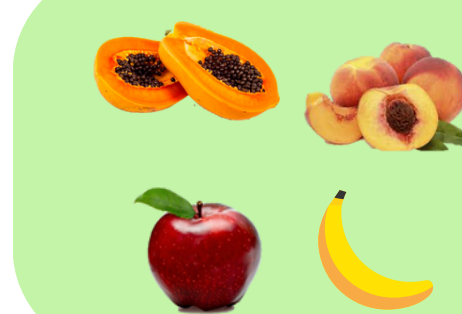

Banana,  
papaya,  
peach, etc.

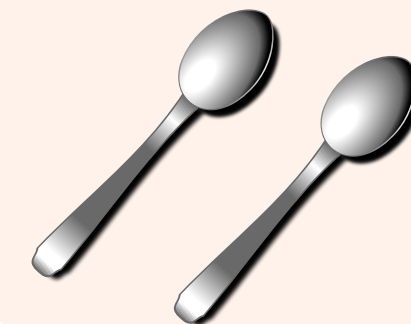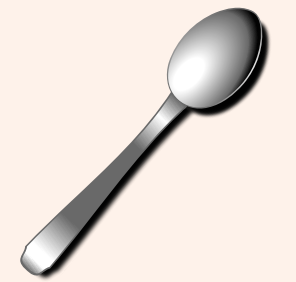

# 12-24 MESES

Foods of  
animal  
origin

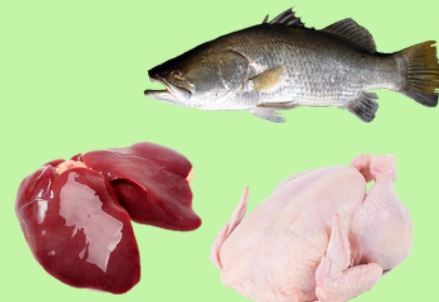

Liver, spleen,  
beef, fish,  
chicken.

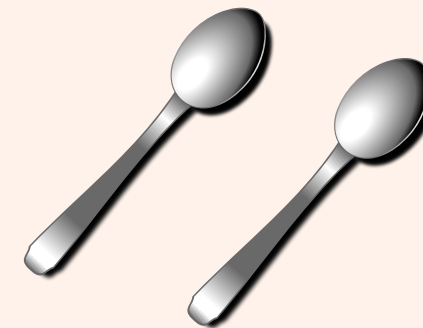

Fats

Cereals and  
tubers

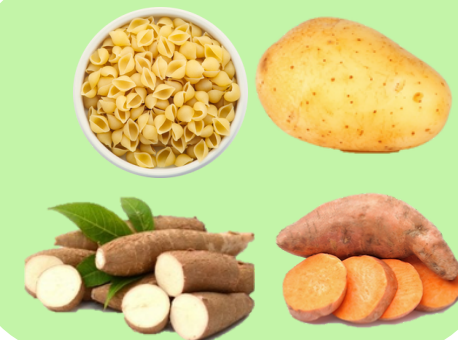

Cassava, sweet  
potato, potato,  
noodles,  
semolina.

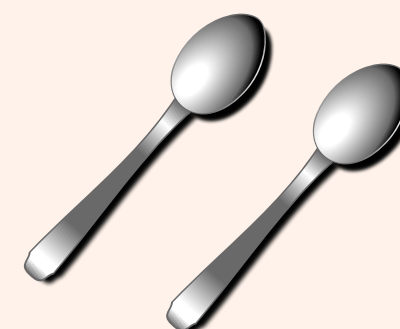

Stews

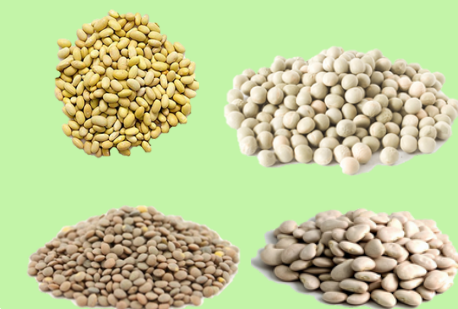

Beans,  
lentils,  
palaras.

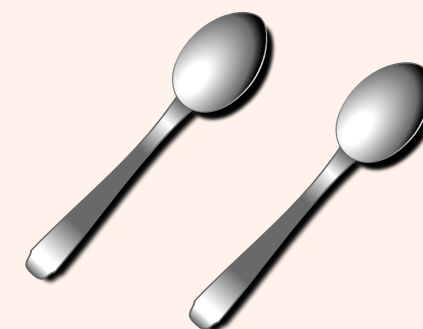

Oil or butter  
in the main  
meal.

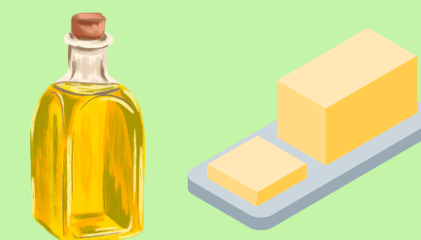

Vegetables

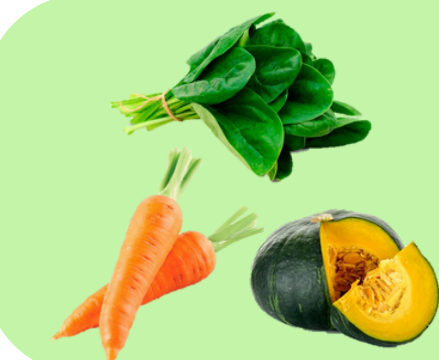

Pumpkin,  
carrot,  
spinach, etc.

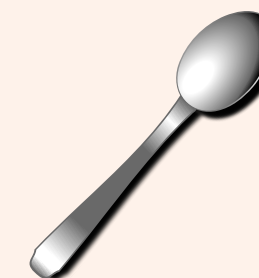

Fruit

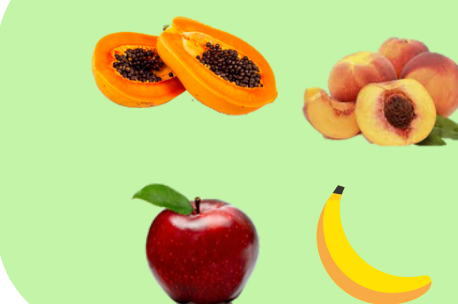

Banana,  
papaya,  
peach, etc.

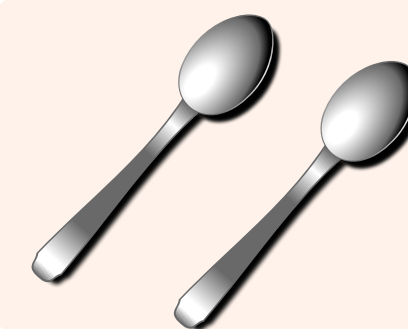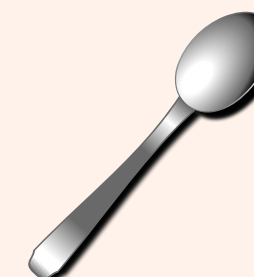

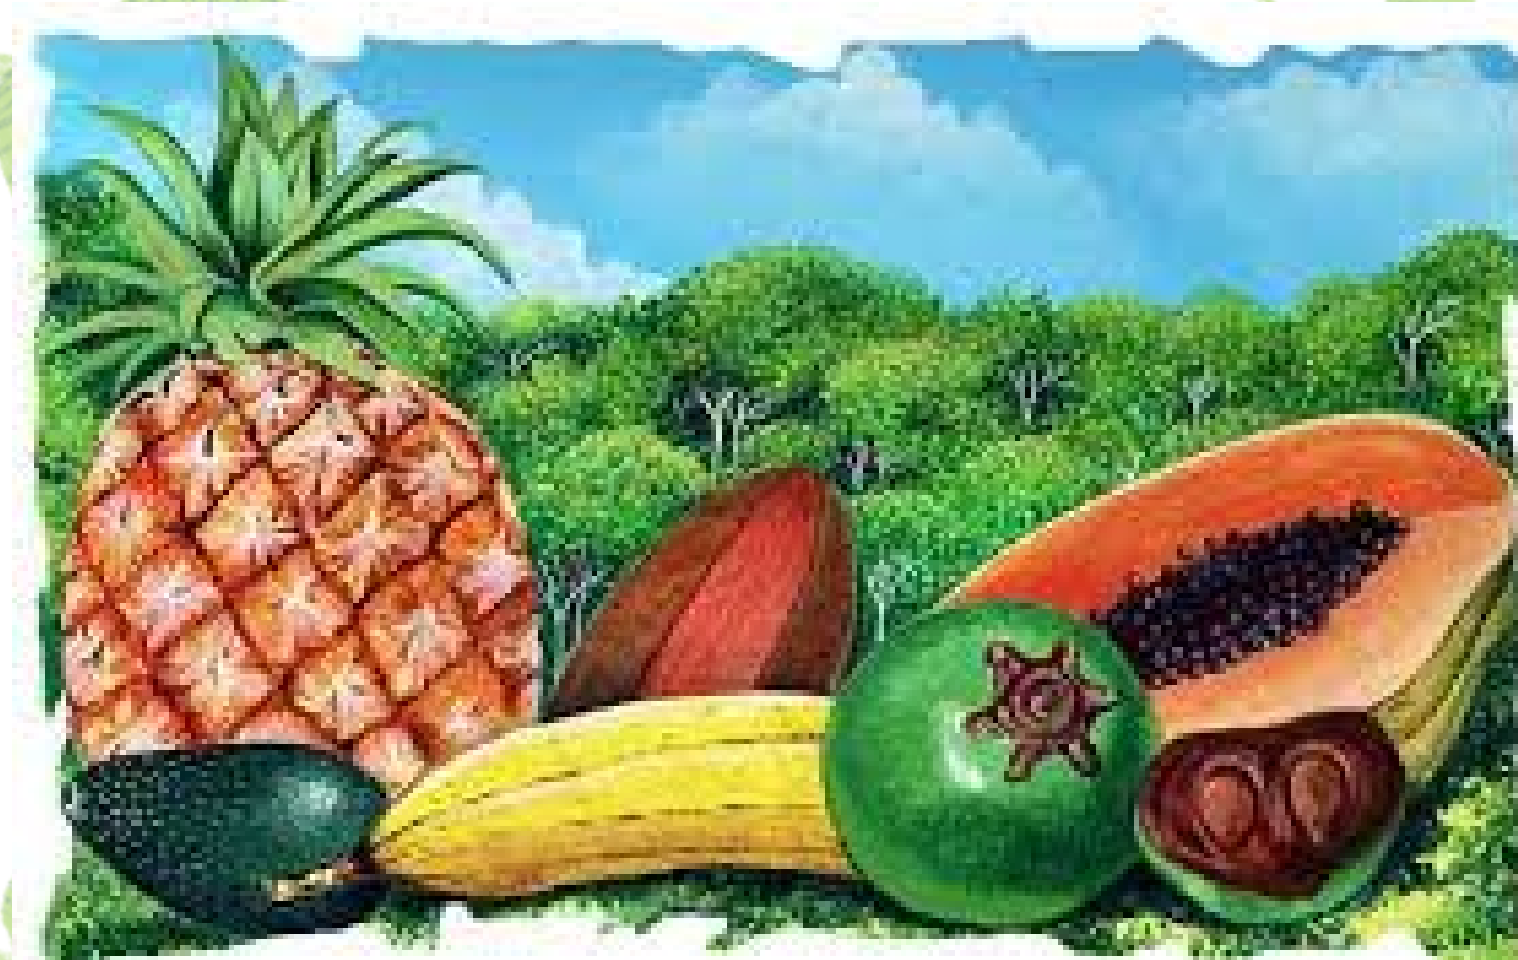

# HEALTHY NUTRITION

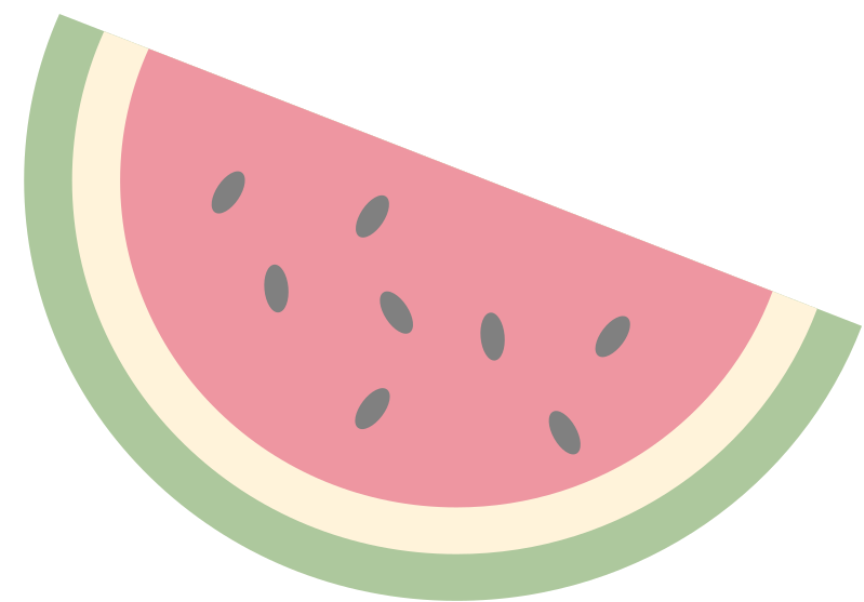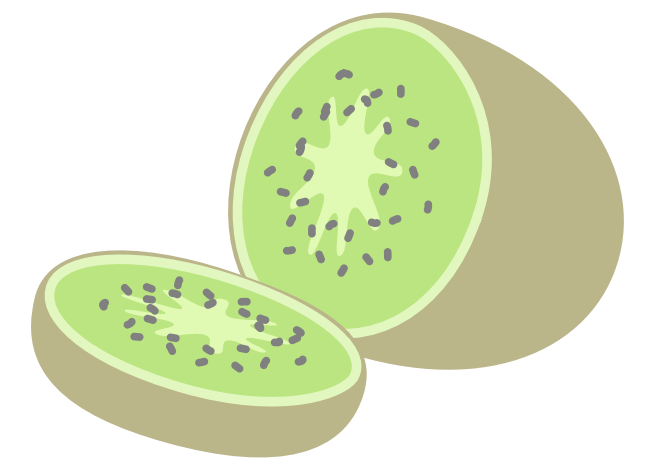

## WHAT IS HEALTHY EATING?

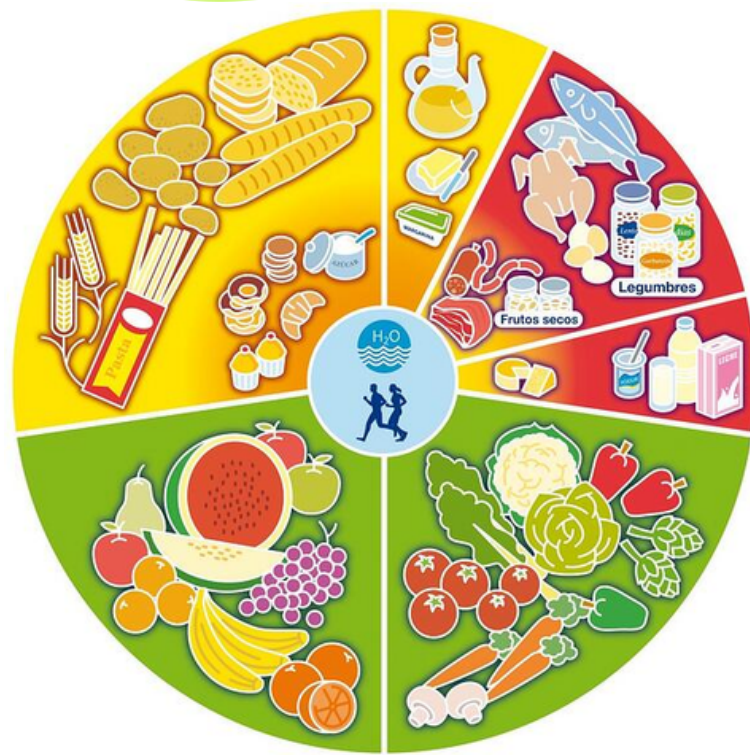

It is one that provides each individual with all the food necessary to meet their nutritional needs.

The best way to achieve an adequate nutritional status is to incorporate a wide variety of mainly fresh, seasonal and local foods into our daily and weekly diet.

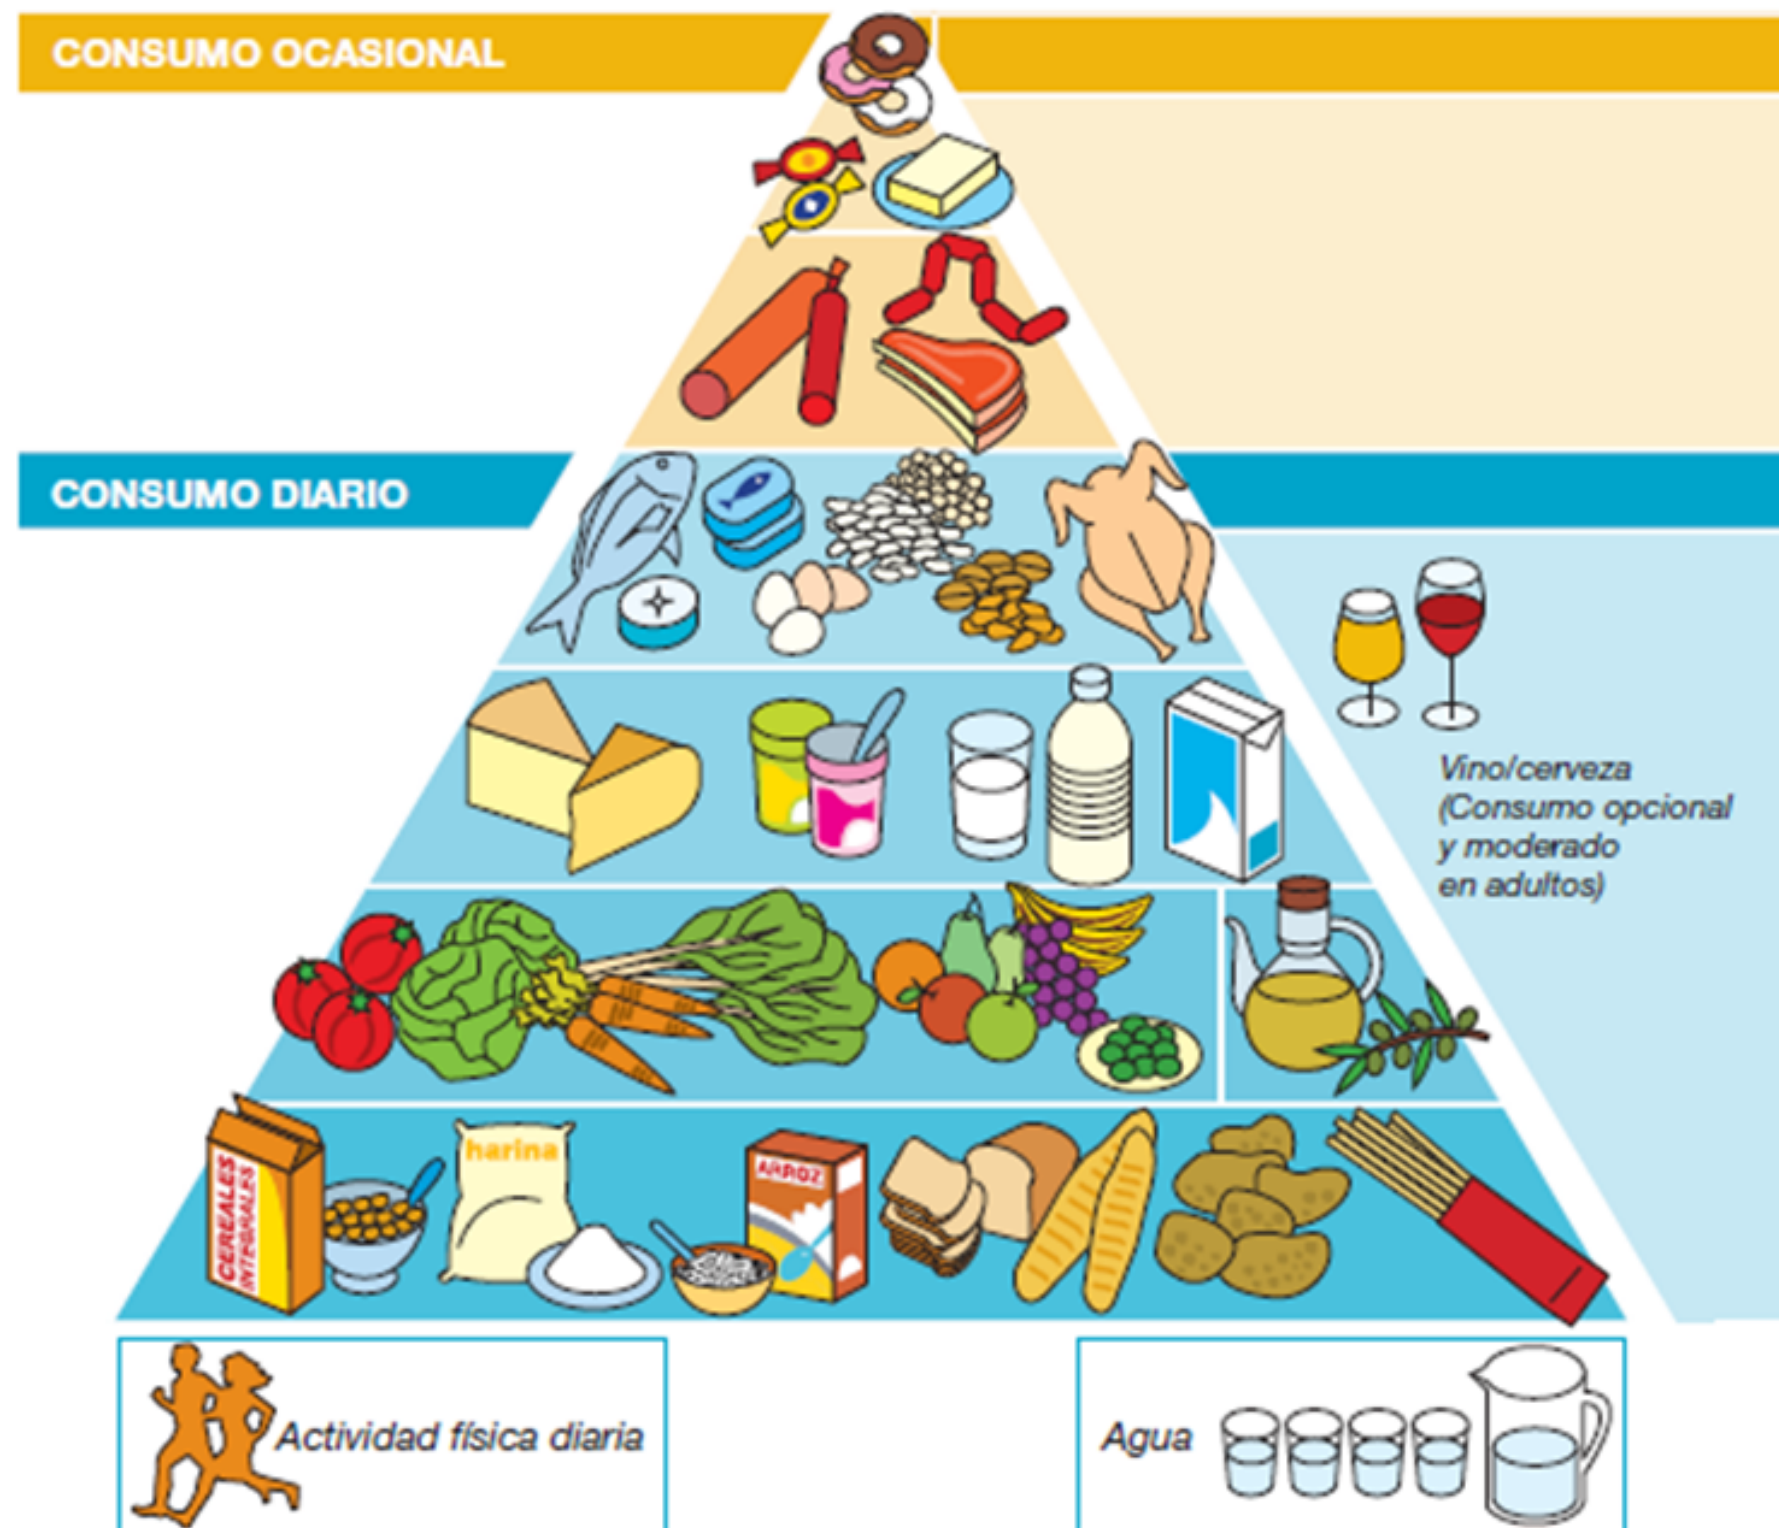

# HOW TO HAVE A HEALTHY DIET?

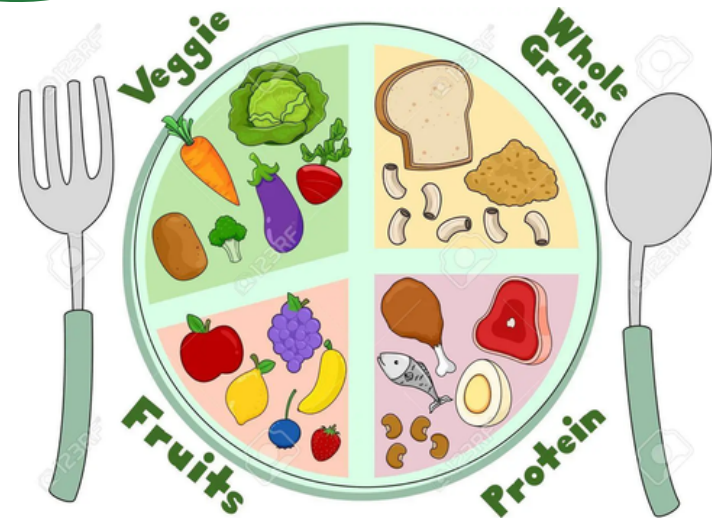

**Incorporate foods from all groups daily**

**Consume legumes, preferably whole grains**

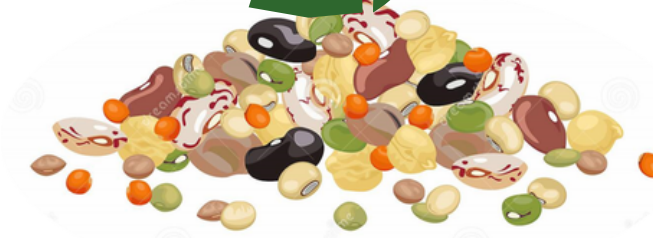

**Set your feeding schedules**

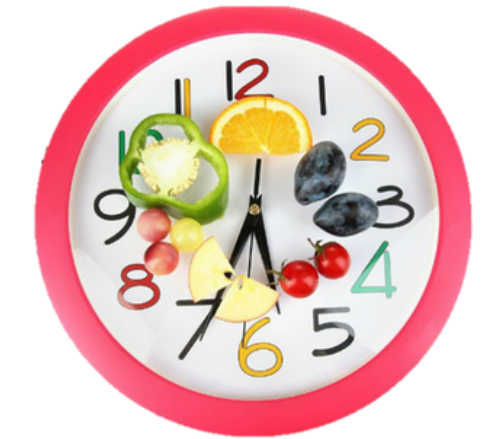

**Consume 5 servings of fruits and vegetables daily in a variety of types and colors**

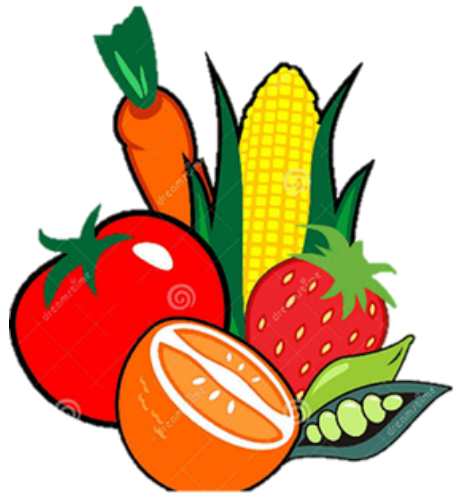

**Get physical activity**

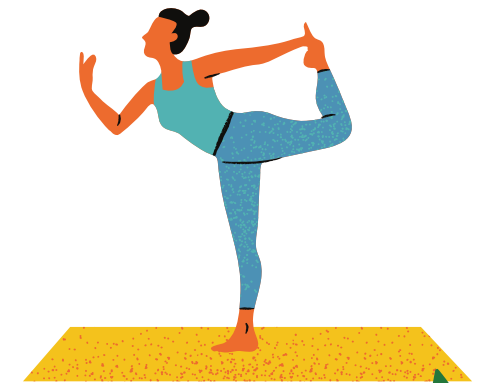

**Moderate meat consumption fats, red and processed, pastries, pastries, sugars, as well as products and drinks with added sugars.**

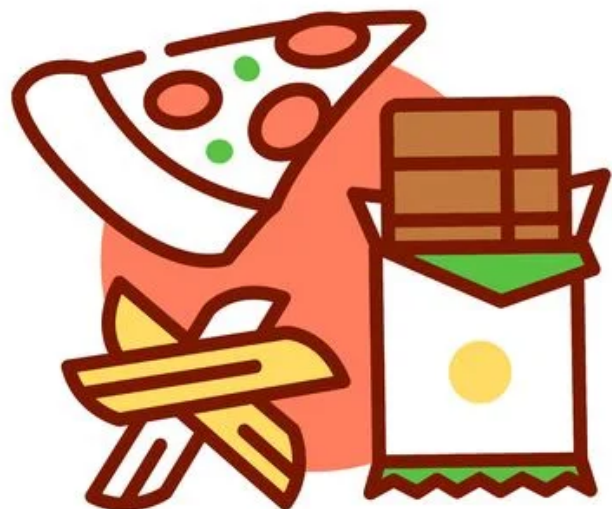

**Drink 8 glasses of water**

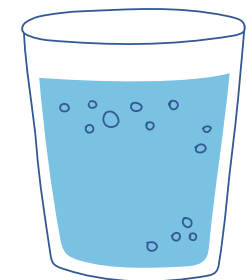

## HEALTHY DISH

25%

### Proteins:

Meat, fish,  
eggs/legumes  
(vegetable protection)

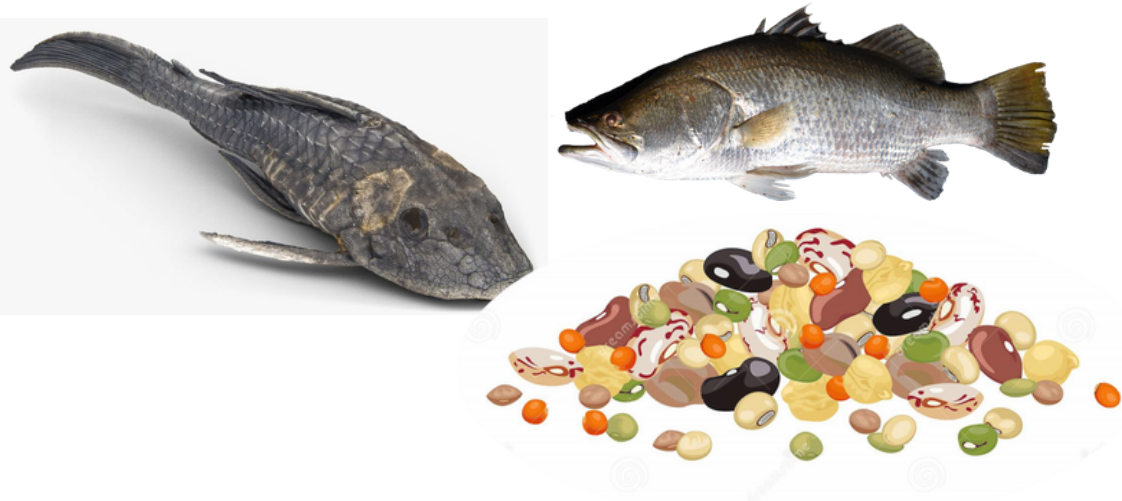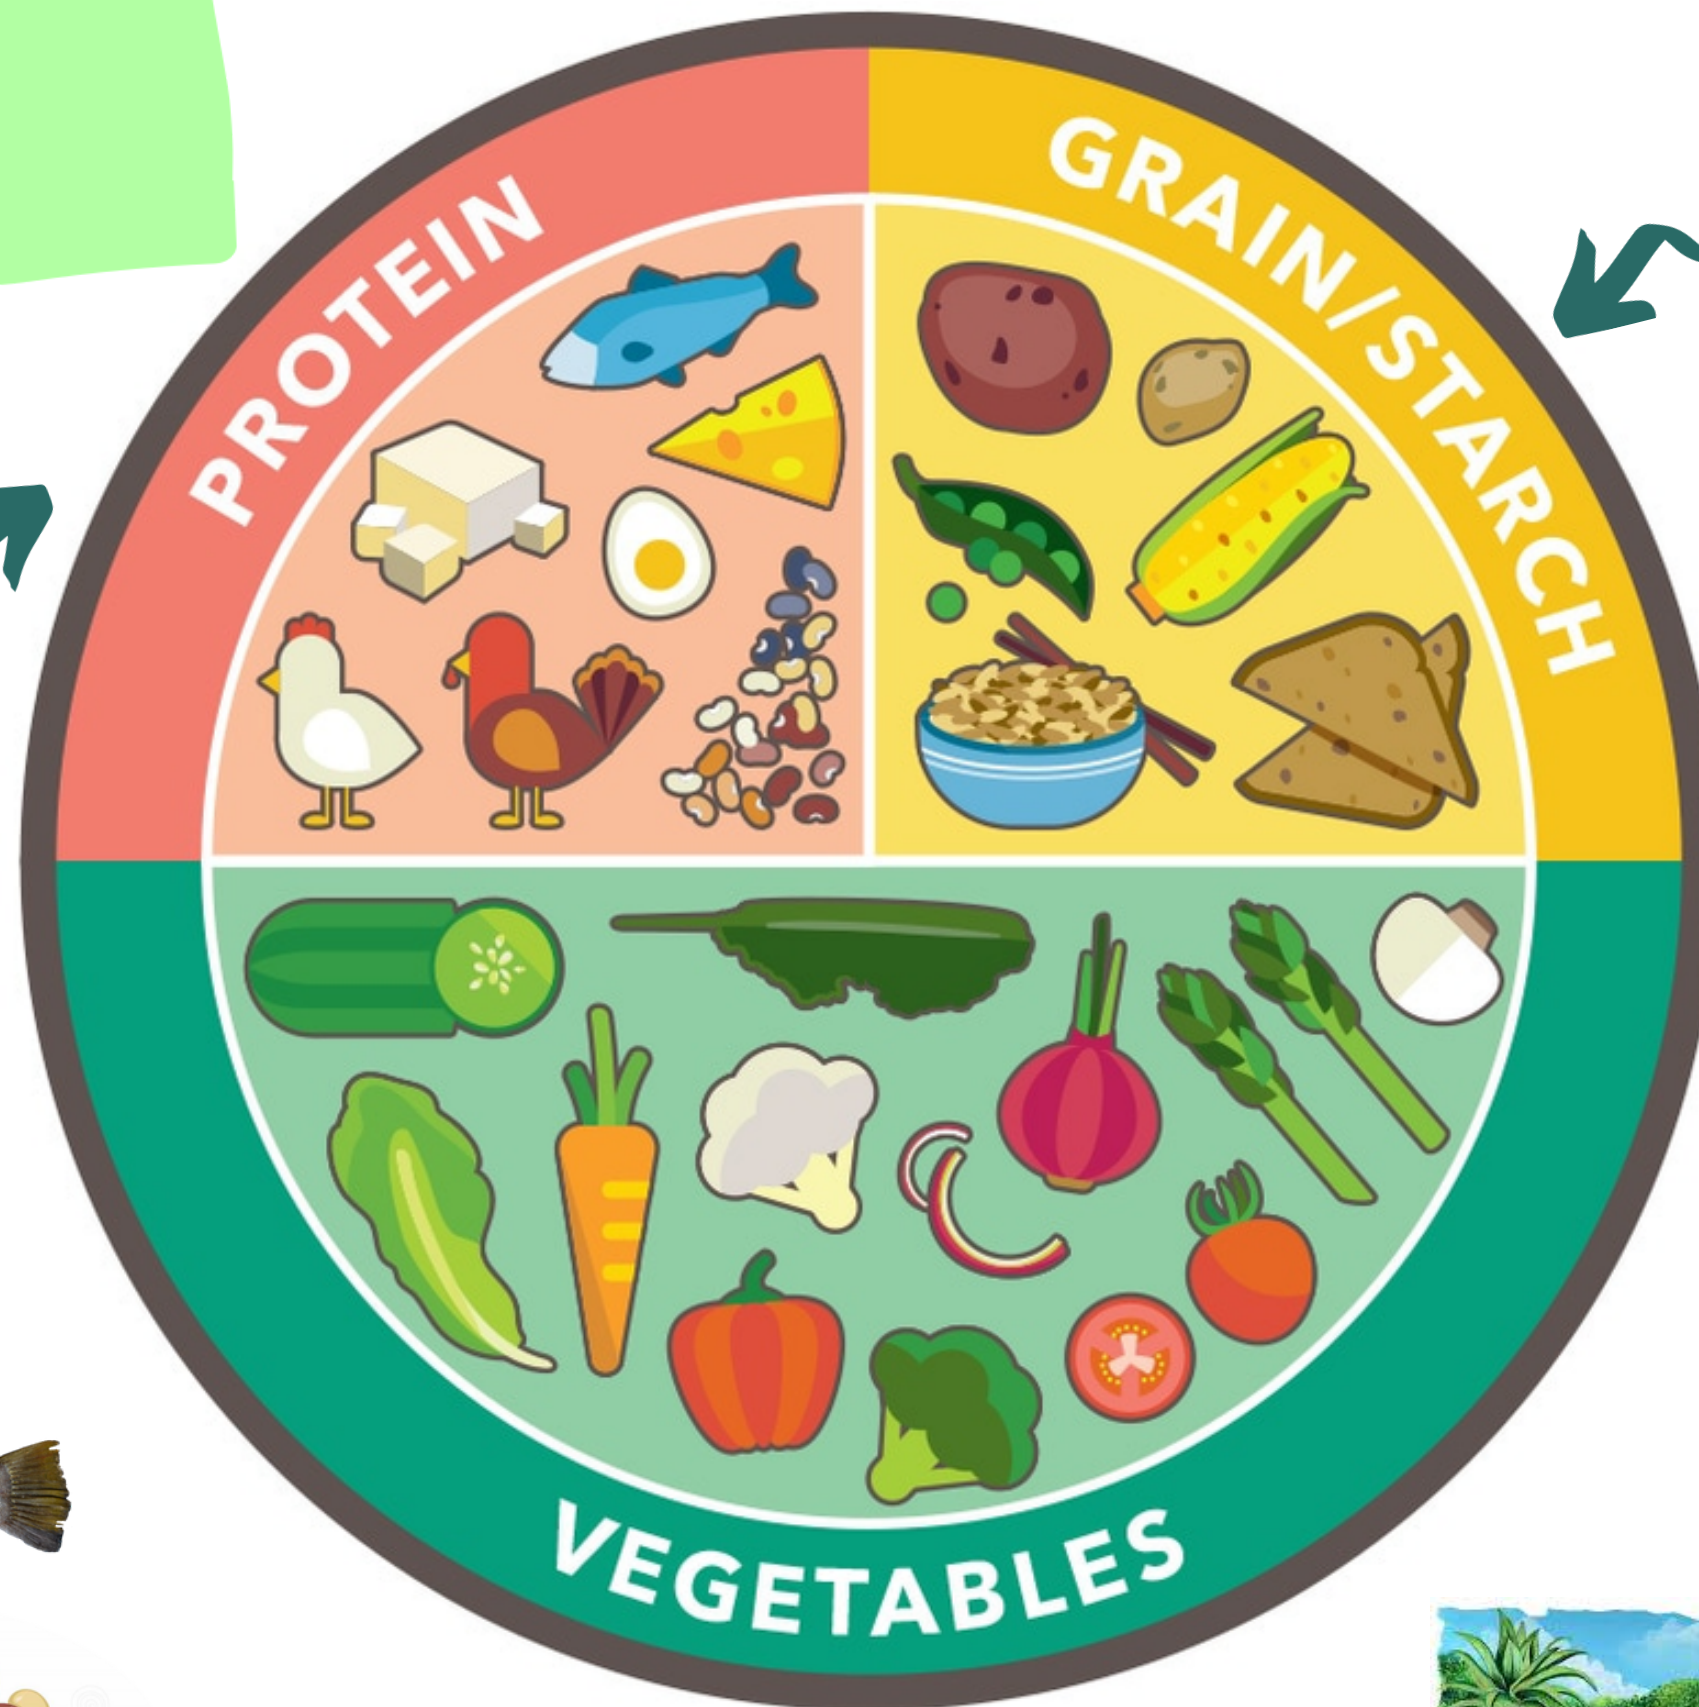

25%

**Carbohydrates:**  
Whole grains and  
tubers

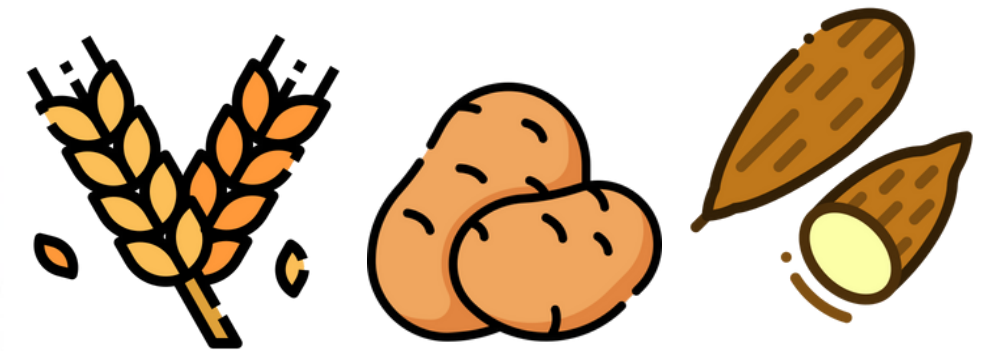

50%

**Vegetables:**  
Fruits and vegetables  
of various colors

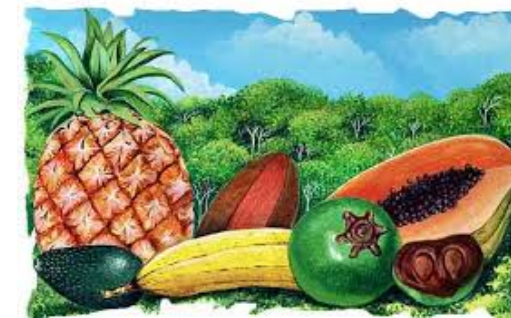

# ANEMIA

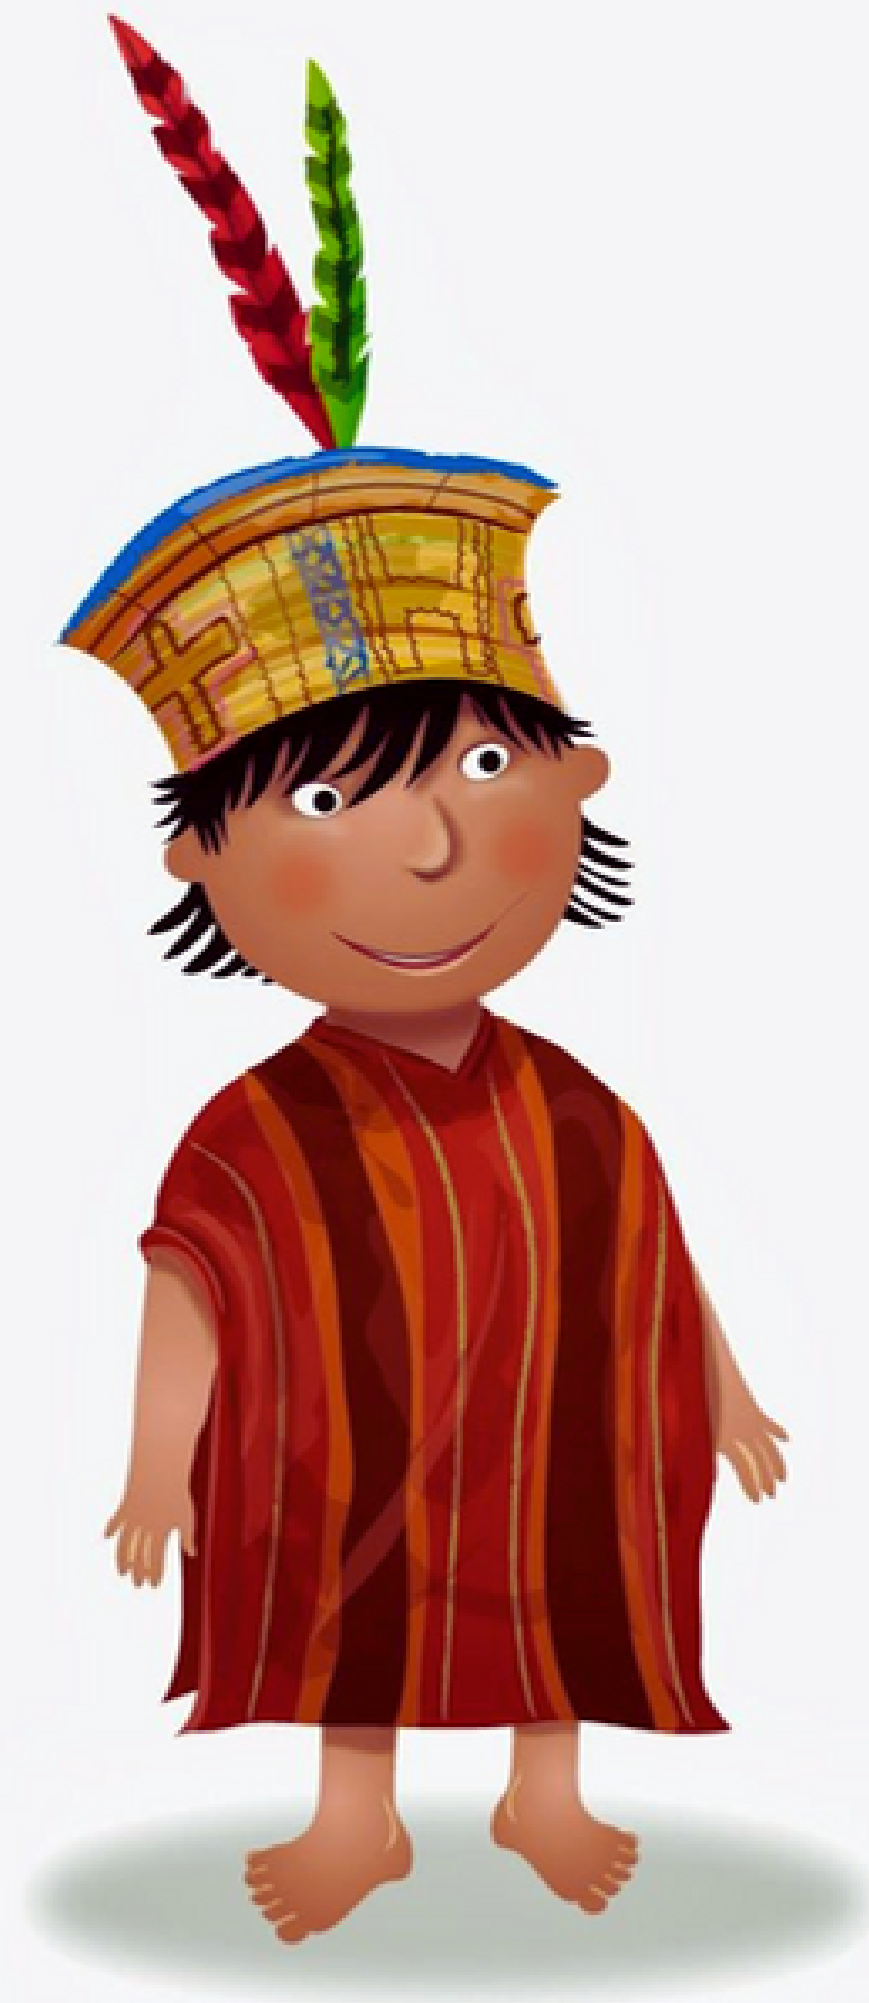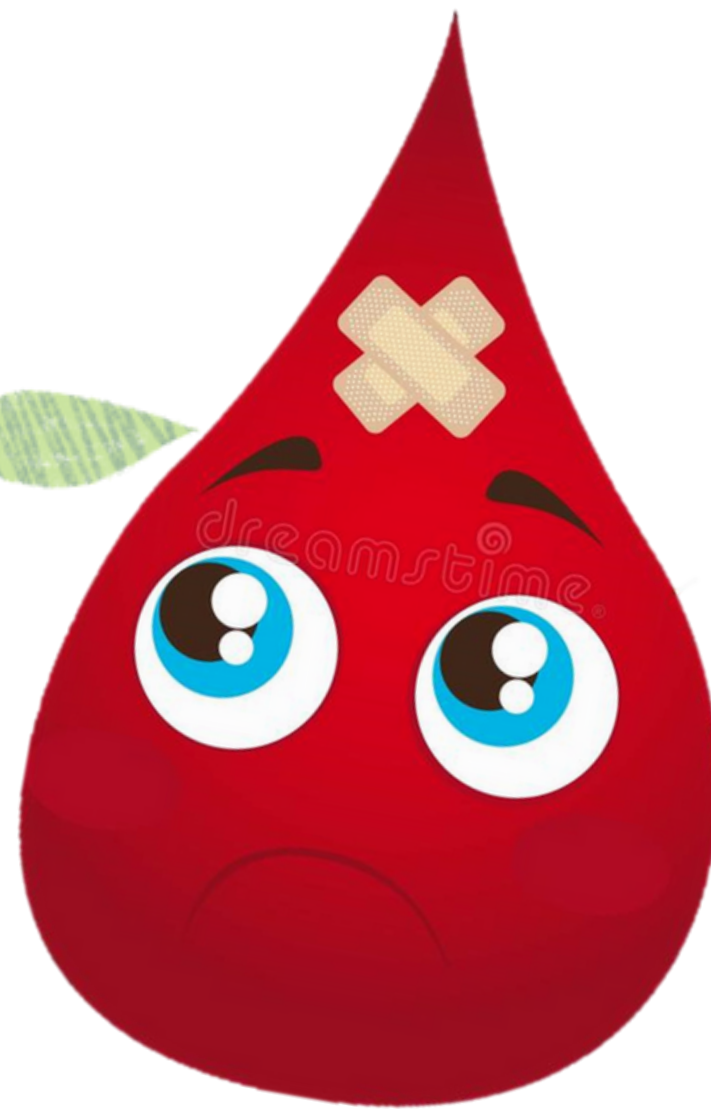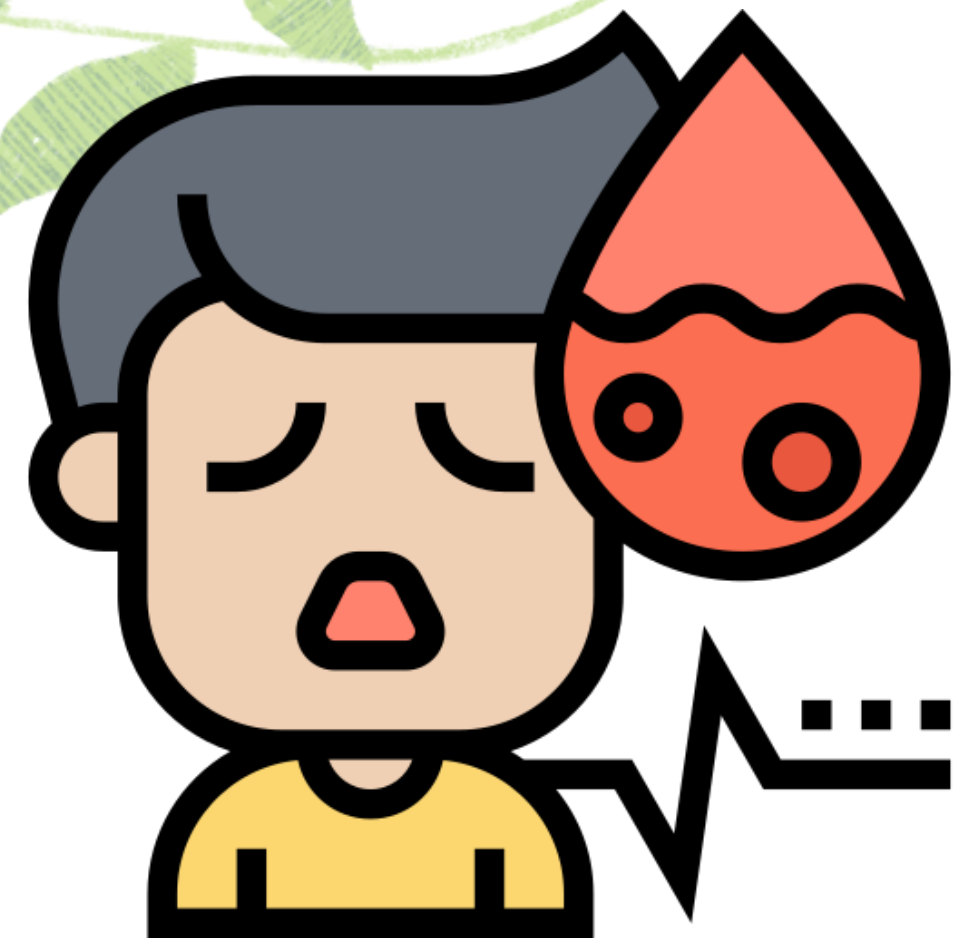

## WHAT IS ANEMIA?

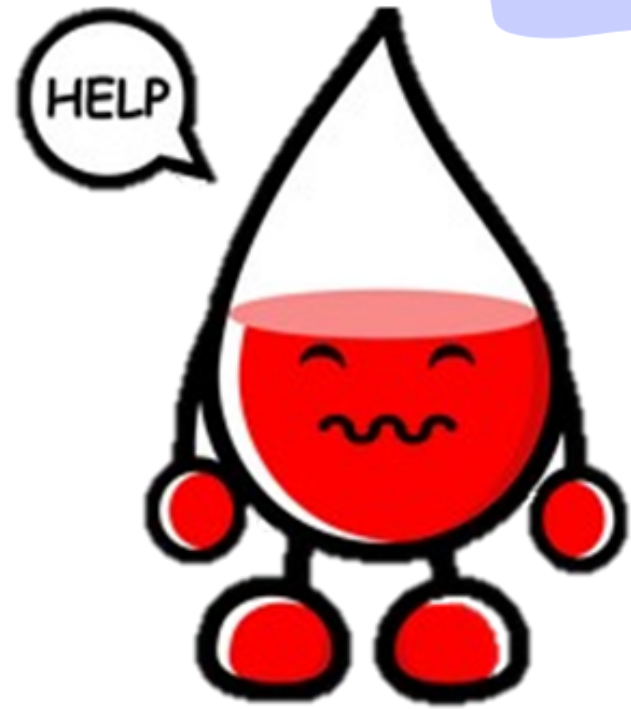

A disorder in which the number of erythrocytes (and, consequently, the oxygen-carrying capacity of the blood) is insufficient to meet the body's needs. Iron deficiency is the most common cause of anemia, but other deficiencies can cause it.

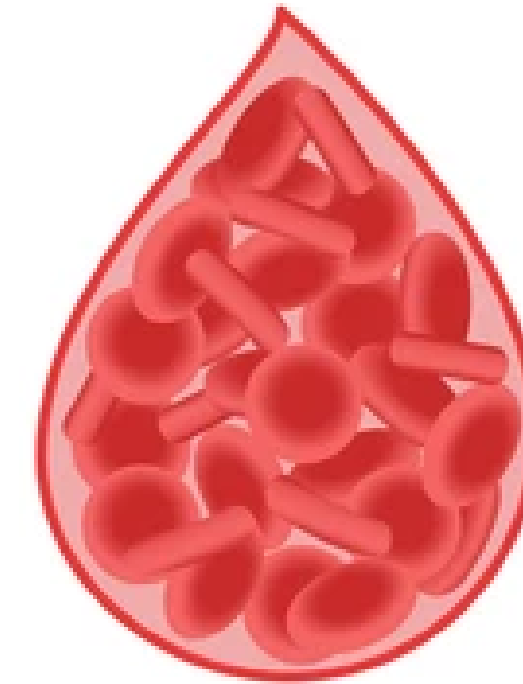

NORMAL

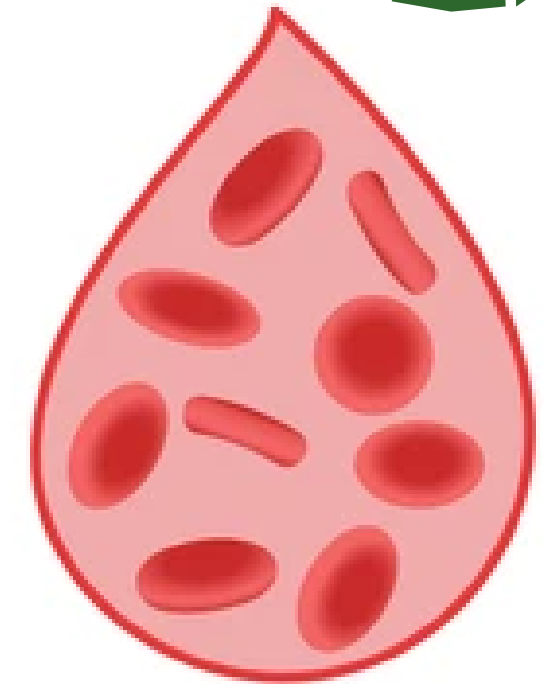

ANEMIA

### IRON DEFICIENCY ANEMIA

Caused by iron deficiency

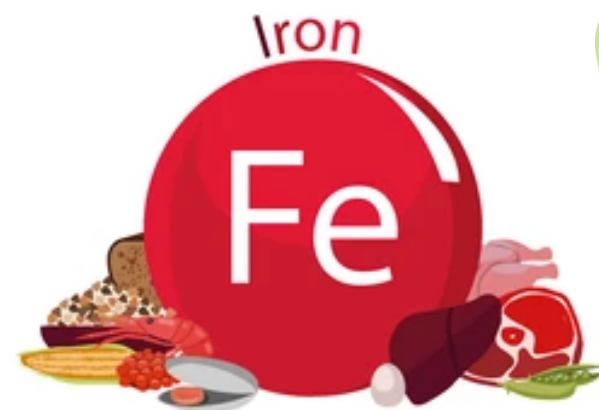

### BIOCHEMICAL VALUES:

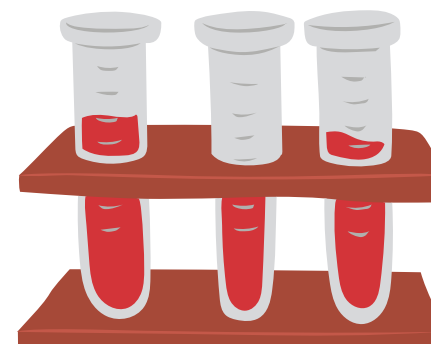

| Criterion  | Men          | Women        |
|------------|--------------|--------------|
| Hemoglobin | 12 a 18 g/dl | 12 a 16 g/dl |
| Hematocrit | 42 a 47%     | 37 a 47%     |

## **SIGNS AND SYMPTOMS**

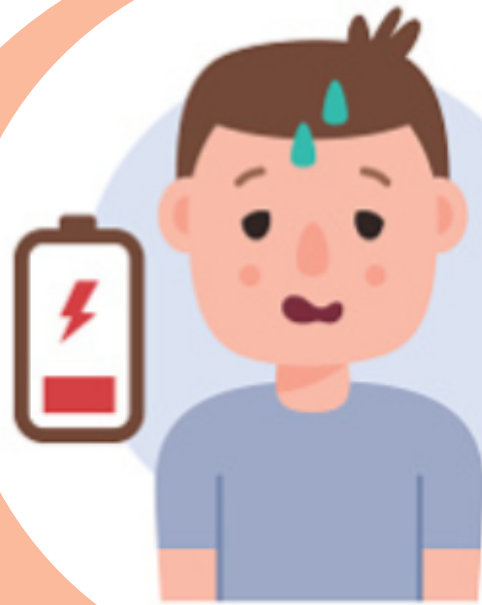

**Fatigue -  
Weakness**

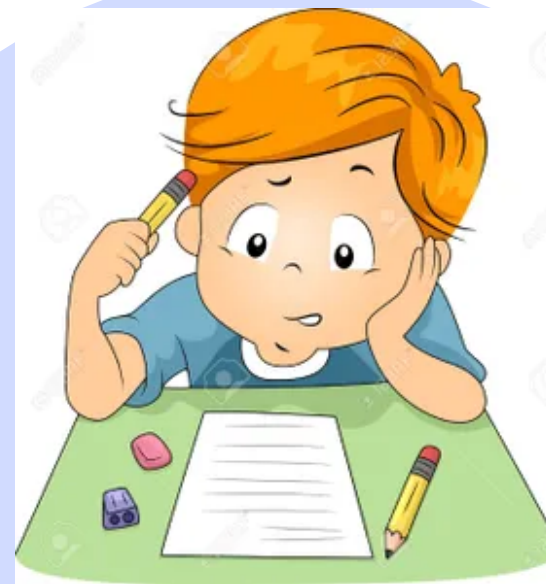

**Poor academic  
performance**

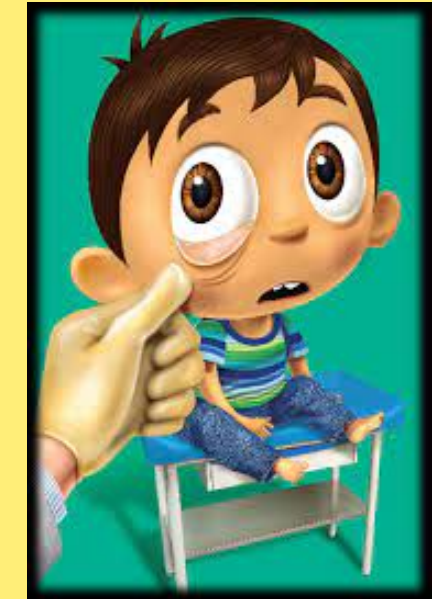

**Pale or  
yellowish  
skin**

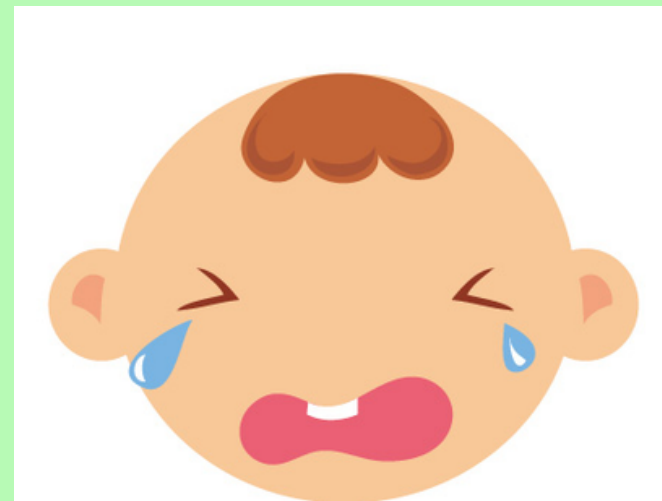

**Irritability**

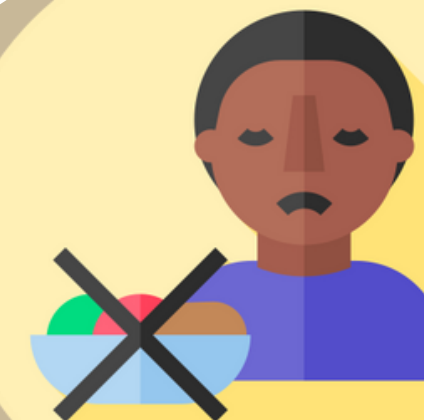

**Loss of  
appetite**

## COMPLICATIONS

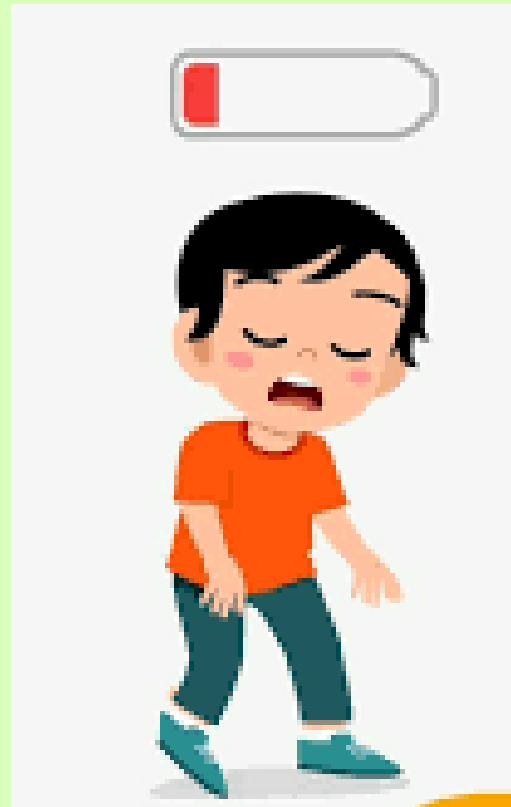

**Decreased physical performance**

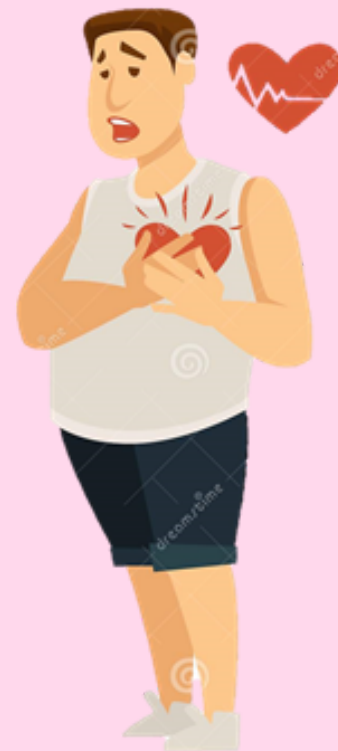

**Heart failure**

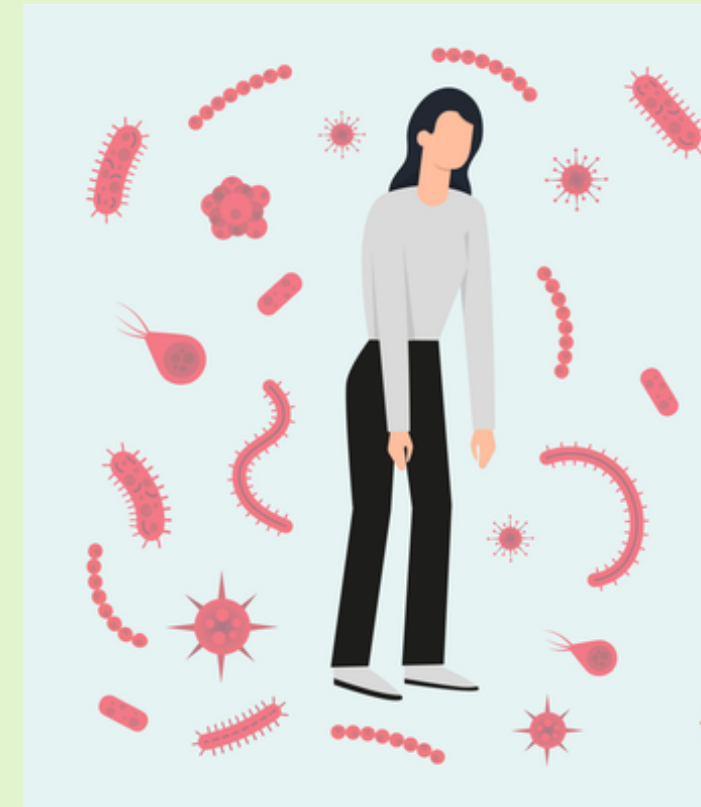

**Alterations of the immune system.**

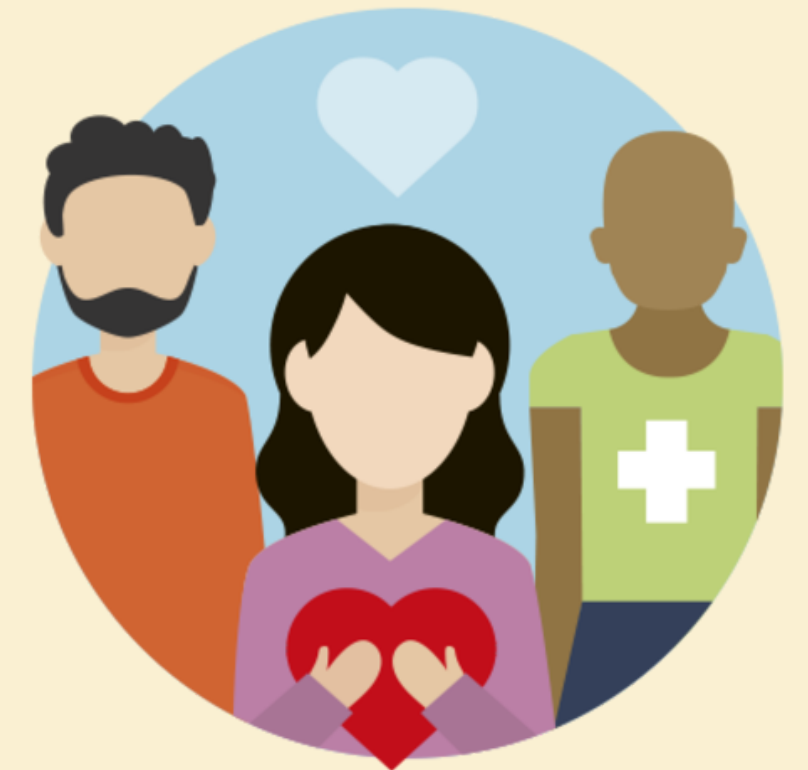

**Affects quality of life**

# HOW TO CONTROL ANEMIA?

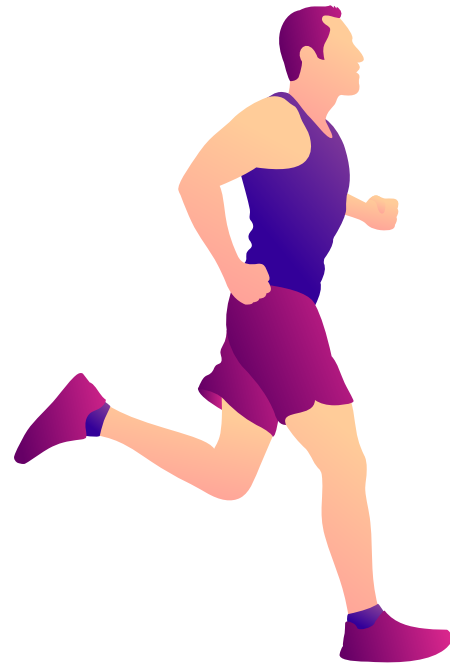

**Get physical activity**

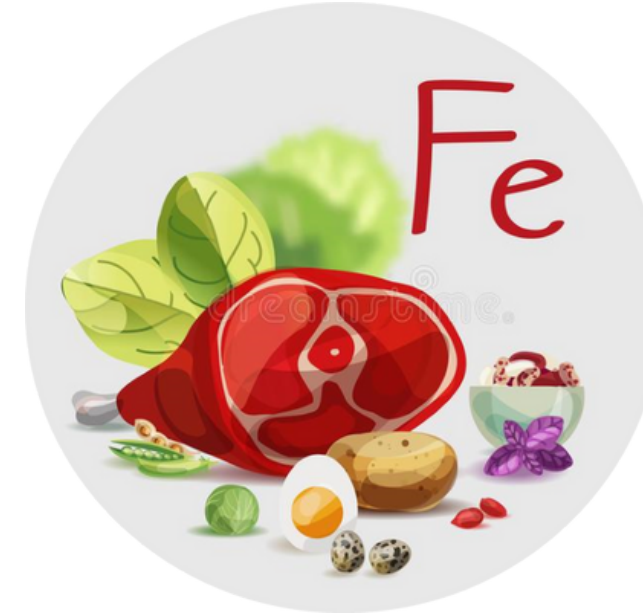

**Eat foods that are sources of iron**

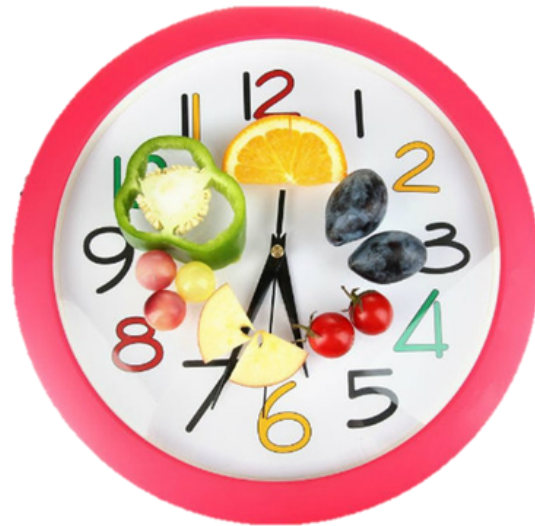

**Set your feeding schedules**

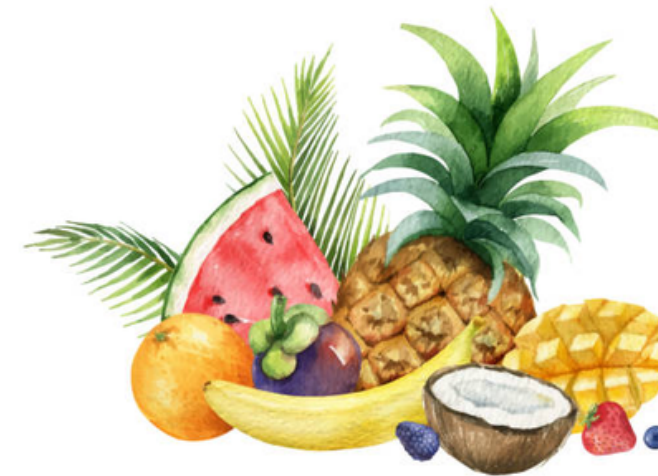

**Eat foods rich in vitamin C**

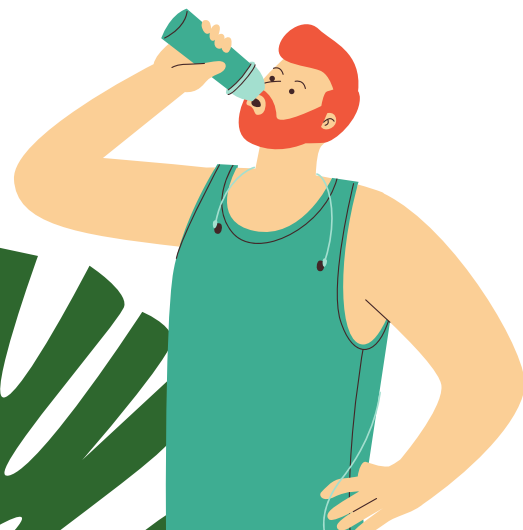

**Drink 8 glasses of water**

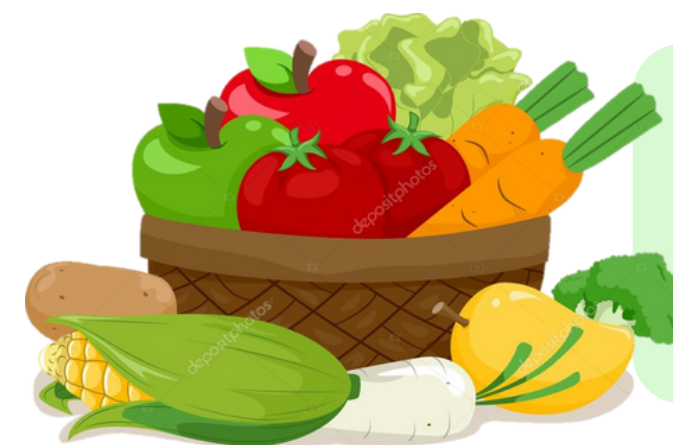

**Maintain a healthy diet**

## FOOD SOURCE IRON

**Animal source: Iron content in 2  
tablespoons (30 g)**

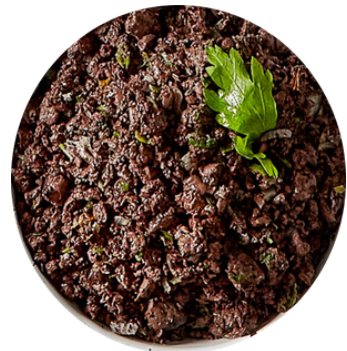

**Beef blood**  
**18.4 g**

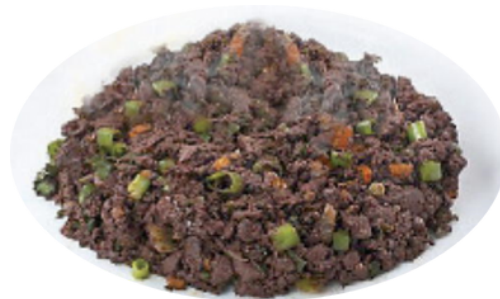

**Ram's blood**  
**17.8 g**

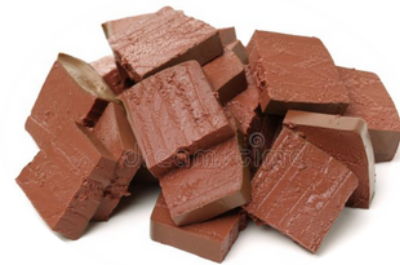

**Chicken blood**  
**8.9 g**

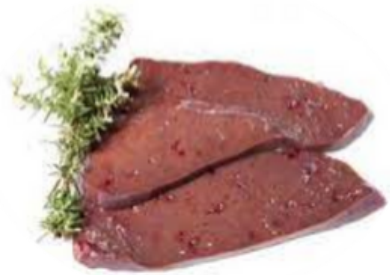

**Beef spleen**  
**8.6 g**

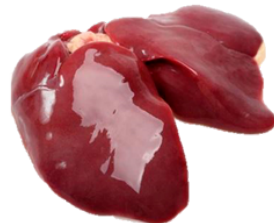

**Chicken's liver**  
**2.6 g**

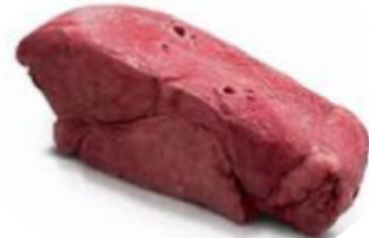

**Beef lung**  
**2 g**

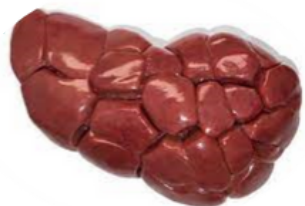

**Beef kidney**  
**2 g**

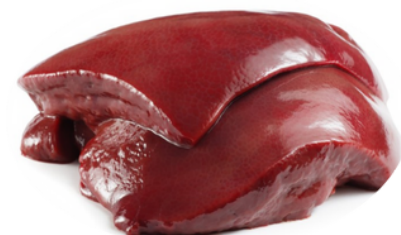

**Cow liver**  
**1.6 g**

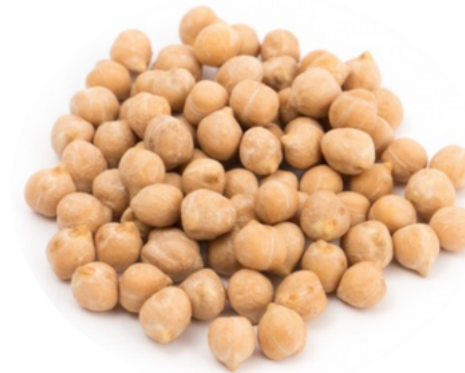

**Chickpea**  
**6.26 g**

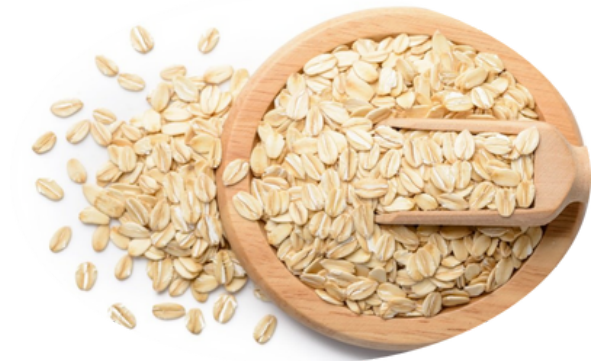

**Oat**  
**4.20 g**

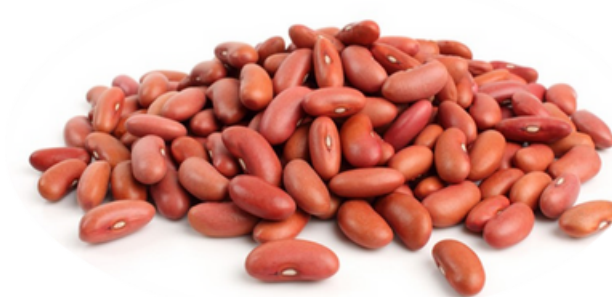

**Bean**  
**3.69 g**

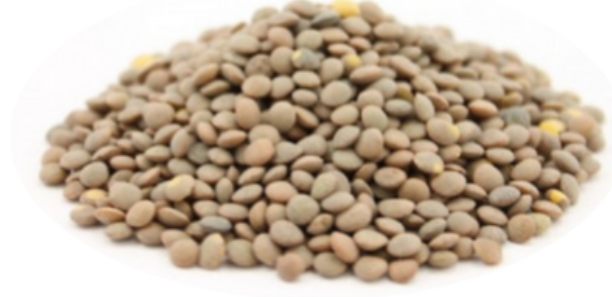

**Lentil**  
**3.33 g**

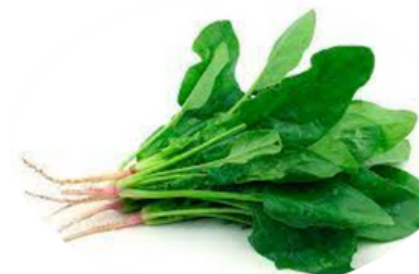

**Spinach**  
**3.57 g**

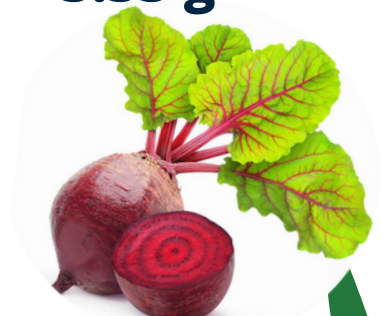

**Beet**  
**3.30 g**

## IMPROVE IRON ABSORPTION

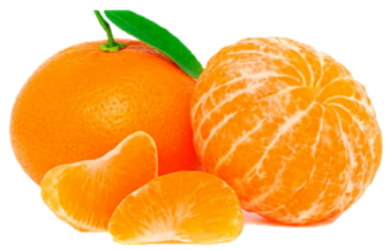

Tangerine

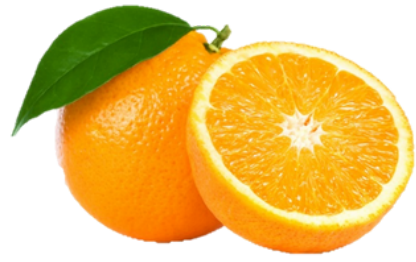

Orange

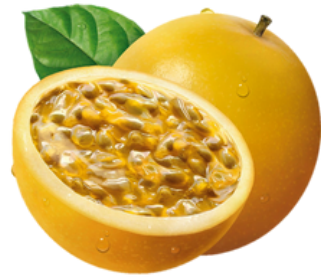

Passion fruit

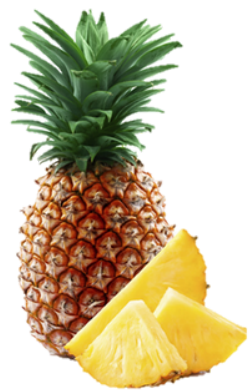

Pineapple

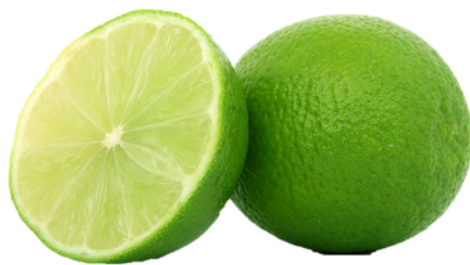

Lemon

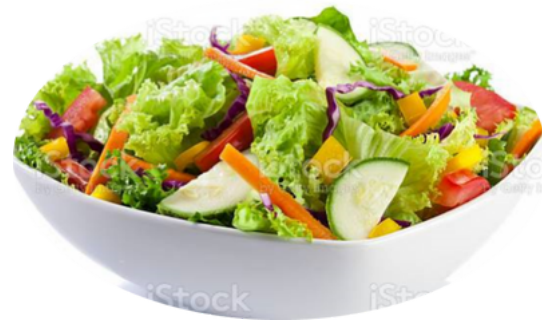

Salad

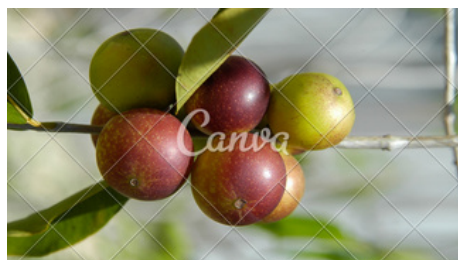

Camú Camú

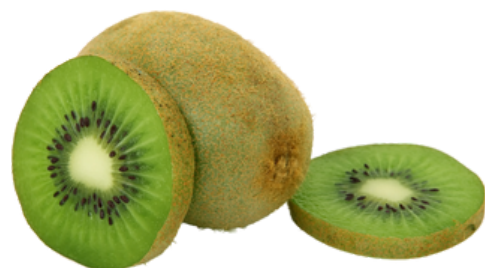

Kiwi

## RESTRICT INHIBITORS

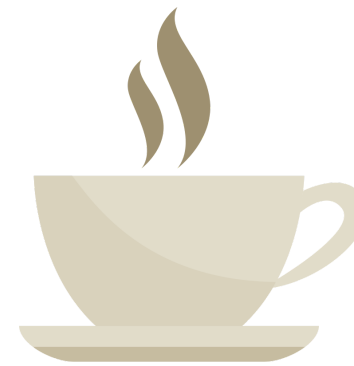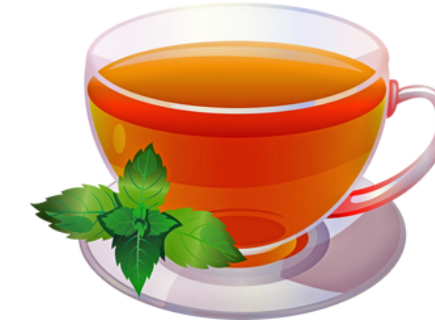

Polyphenols (Tea, coffee)

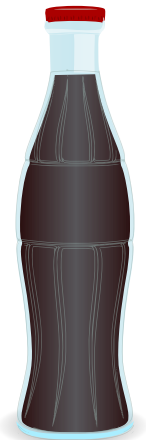

Soda

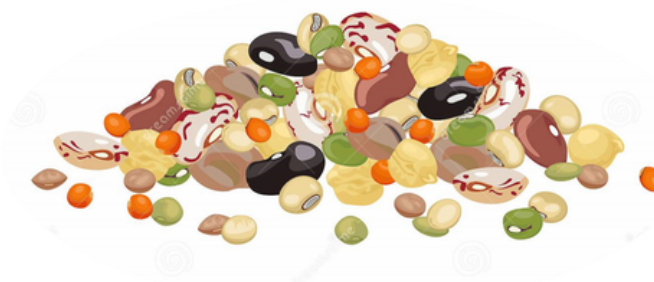

Phytates (whole grains and legumes)

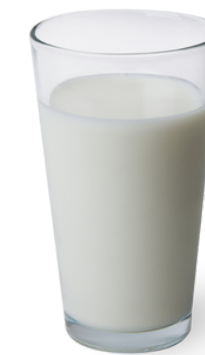

Calcium

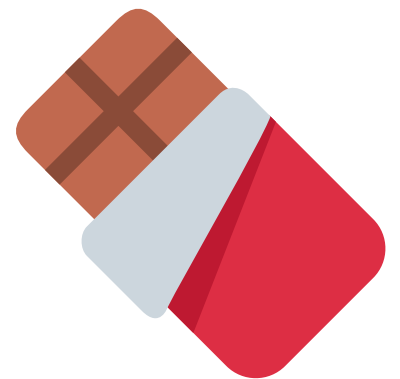

Chocolates

**DON'T CONSUME THEM WITH FOOD**

# SUPPLEMENTATION

## MICRONUTRIENT SUPPLEMENTATION

**Vitamin A**

**Zinc**

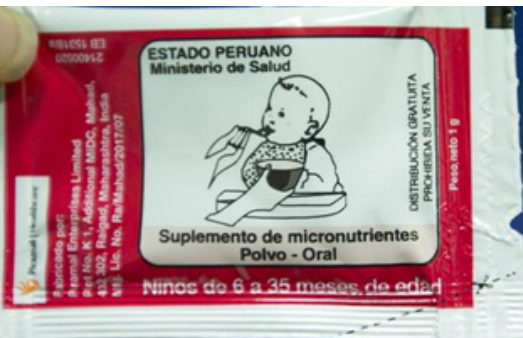

**Folic acid**

**Vitamin C**

**Iron**

Contributes to the prevention and recovery of iron deficiency anemia in boys and girls.

### IMPORTANCE

**El micronutriente llega a cubrir la brecha de requerimiento de hierro en un niño**

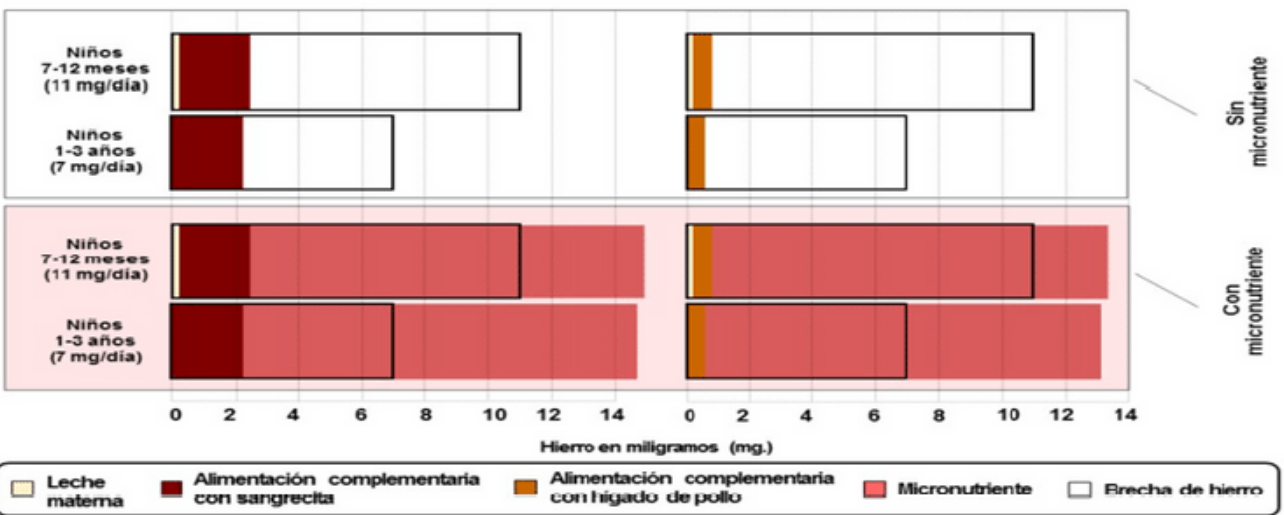

## FUNCTION IN ANEMIA

**Vitamin A**

Vitamin A deficiency impairs iron utilization as it contributes to its availability.

**Vitamin C**

Increases iron absorption from the entire meal

**Zinc**

Helps in the metabolism of vitamin A.

**Iron**

Helps in the production of red blood cells, thus preventing anemia.

**Folic acid**

It helps the formation of red blood cells, thus contributing to the prevention of anemia.

## WHO ARE THEY FOR?

For boys and girls from 04 to 35 months

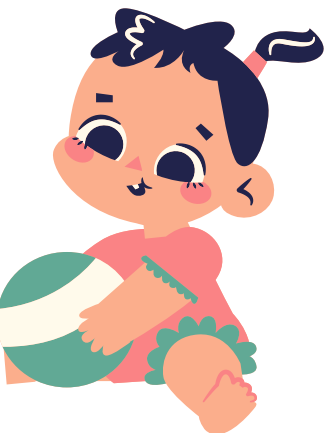

## DOES IT HAVE SIDE EFFECTS?

Micronutrients can cause dark stools or loose stools. These discomforts are mild and disappear in two weeks.

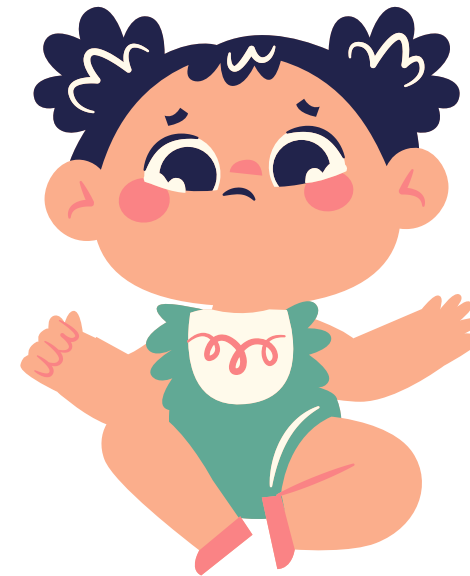

## CONSUMPTION TIME

The girl or boy has to consume one sachet every day for 12 months in a row. If micronutrient supplementation was not started at 4 months, it can be done in the following months until the child is three years old.

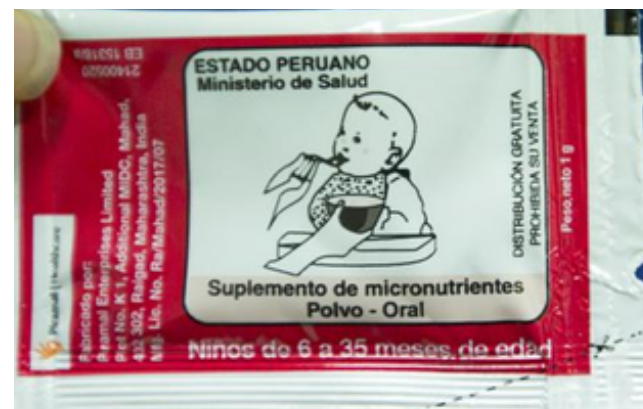

## PREPARATION MODE

The way micronutrients are prepared is very important, since whether the child accepts the food given depends on this.

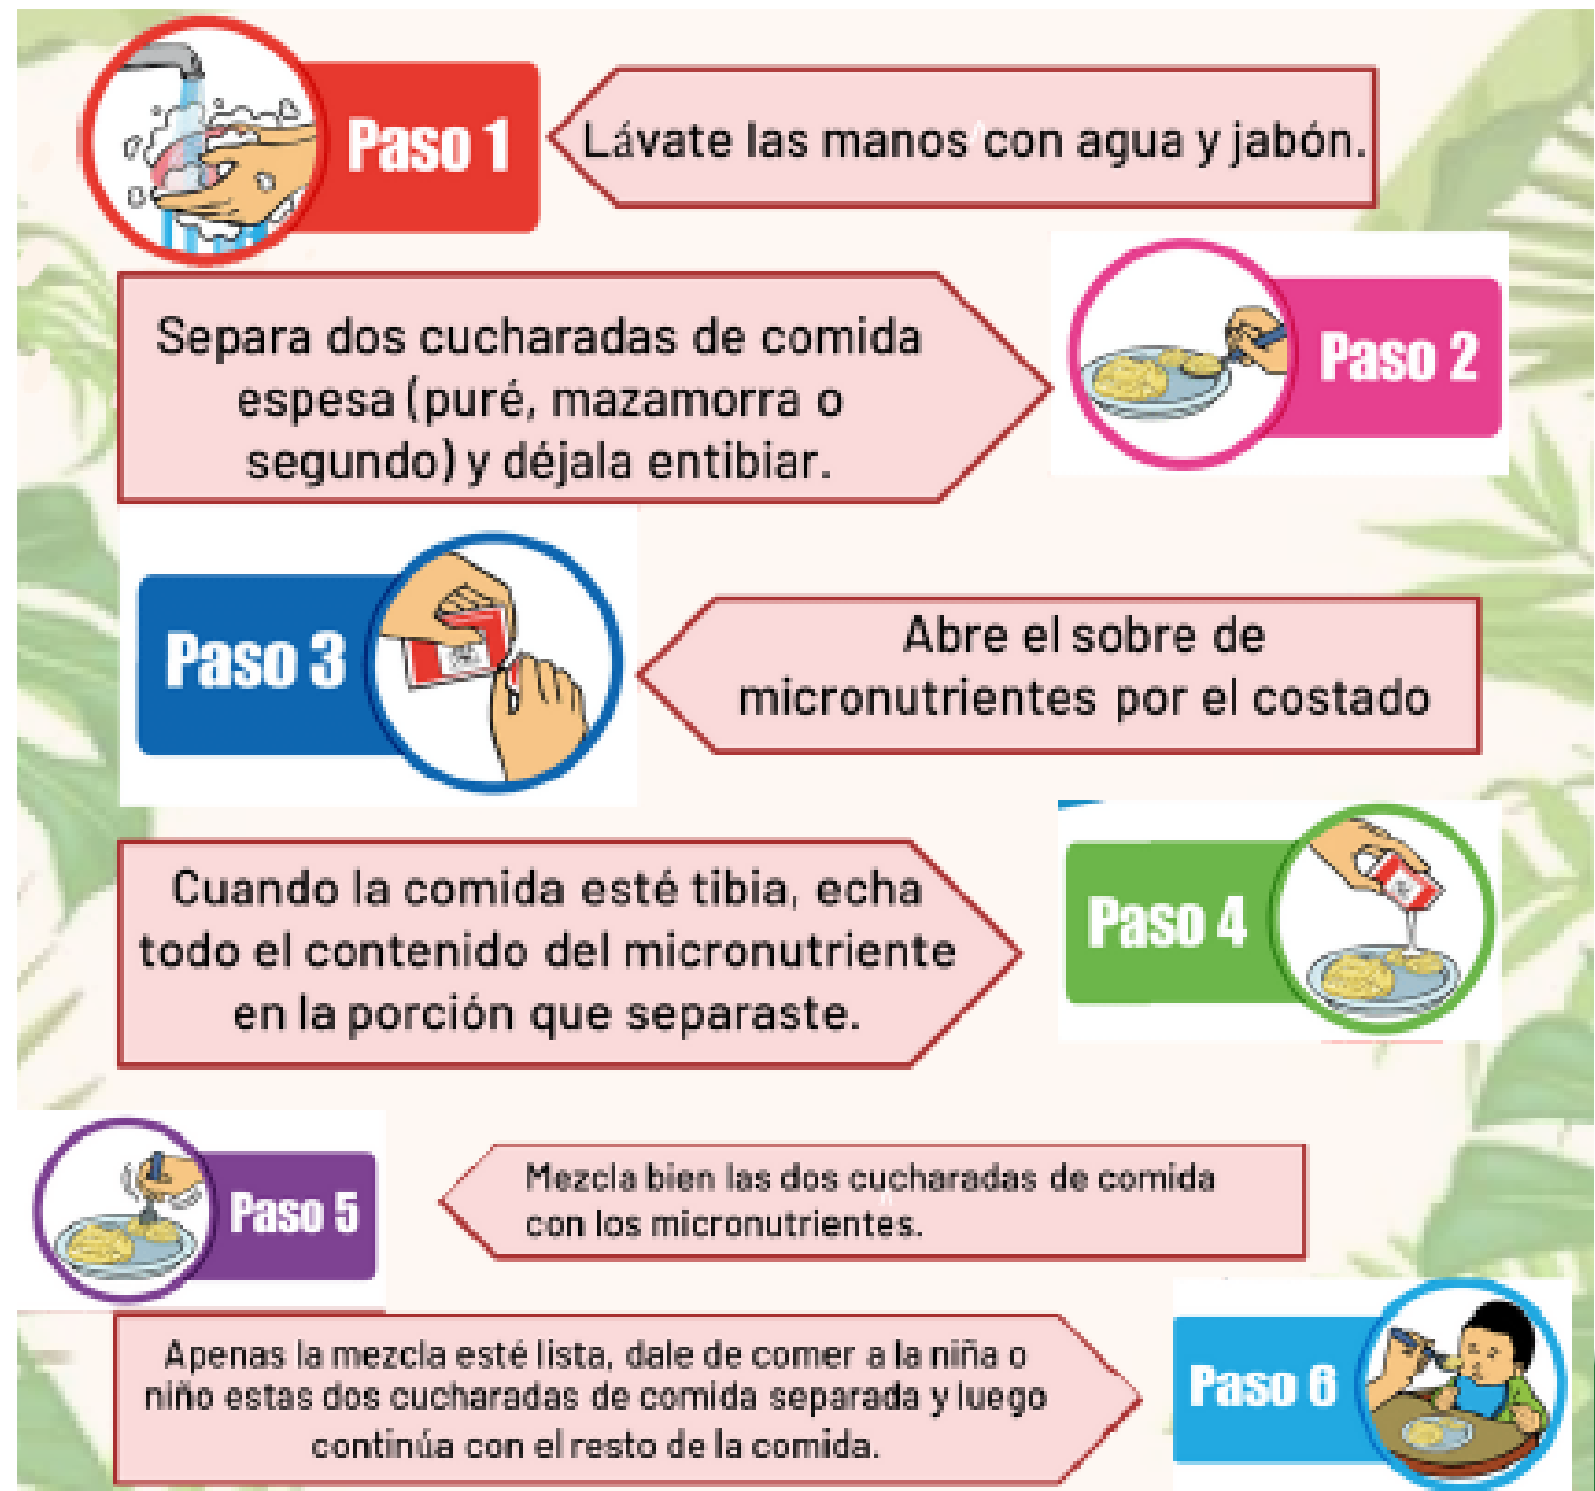

# FERROUS SULFATE SUPPLEMENTATION

There are various presentations for the therapeutic and preventive management of anemia.

| PRESENTACION | PRODUCTO                       | CONTENIDO DE HIERRO ELEMENTAL                                                                                                              |
|--------------|--------------------------------|--------------------------------------------------------------------------------------------------------------------------------------------|
| GOTAS        | Sulfato Ferroso                | 1 gota = 1,25 mg Hierro elemental                                                                                                          |
|              | Complejo Polimaltosado Férrico | 1 gota = 2,5 mg Hierro elemental                                                                                                           |
| JARABE       | Sulfato Ferroso                | 1 ml = 3 mg de Hierro elemental.                                                                                                           |
|              | Complejo Polimaltosado Férrico | 1 ml= 10 mg de Hierro elemental.                                                                                                           |
| TABLETAS     | Sulfato Ferroso                | 60 mg de Hierro elemental                                                                                                                  |
|              | Polimaltosado                  | 100 mg de Hierro elemental                                                                                                                 |
| POLVO        | Micronutrientes                | Hierro (12,5 mg Hierro elemental)<br>Zinc (5 mg)<br>Ácido fólico (160 ug)<br>Vitamina A (300 ug Retinol Equivalente)<br>Vitamina C (30 mg) |

- The supplement is given only once a day. In adverse effects
- Divide the doses up to 2 doses.
- It must be done for six months.
- Consumption away from meals, preferably 1 to 2 hours later.
- In case of constipation, it will pass with adequate consumption of fruits, water, vegetables.
- Anemia is ruled out from 4 months of age

# PREVENTIVE SUPPLEMENTATION

- Preventive supplementation will begin with drops at 4 months of age (ferrous sulfate or ferric polymaltose complex in drops).
- Preventive supplementation will be administered at a dose of 2 mg/kg/day until six months are reached.
- Then, preventive supplementation will continue by delivering drops or syrup according to their weight from 6 months of age to one year of age.
- The child who did not receive iron supplementation at 6 months can start it at any age, within the range of 6 months to 3 years.
- If the consumption of the supplement is suspended, the scheme must be continued until the 6 months are completed. Avoid prolonged withdrawal times; In case of suspension of more than one month, the scheme is restarted.

| CONDICIÓN DEL NIÑO                                  | EDAD DE ADMINISTRACIÓN                      | DOSIS <sup>1</sup><br>(Via oral) | PRODUCTO A UTILIZAR                                                | DURACIÓN                                          |
|-----------------------------------------------------|---------------------------------------------|----------------------------------|--------------------------------------------------------------------|---------------------------------------------------|
| Niños con bajo peso al nacer y/o prematuros         | Desde los 30 días hasta los 6 meses         | 2 mg/kg/día                      | Gotas Sulfato Ferroso<br>o<br>Gotas Complejo Polimaltosado Férrico | Suplementación diaria hasta los 6 meses cumplidos |
|                                                     | Desde los 6 meses de edad                   | 1 sobre diario                   | Micronutrientes:<br>Sobre de 1 gramo en polvo                      | Hasta que complete el consumo de 360 sobres       |
| Niños nacidos a término, con adecuado peso al nacer | Desde los 4 meses de edad hasta los 6 meses | 2 mg/kg/día                      | Gotas Sulfato Ferroso<br>o<br>Gotas Complejo Polimaltosado Férrico | Suplementación diaria hasta los 6 meses cumplidos |
|                                                     | Desde los 6 meses de edad                   | 1 sobre diario                   | Micronutrientes*:<br>Sobre de 1 gramo en polvo                     | Hasta que complete el consumo de 360 sobres       |

\* Si el EESS no cuenta con Micronutrientes podrá seguir usando las gotas o jarabe según el peso corporal

TREATMENT IN CHILDREN UNDER 6 MONTHS OF AGE WITH LOW WEIGHT

| CONDICIÓN                                 | EDAD DE ADMINISTRACIÓN | DOSIS <sup>2</sup><br>(Vía oral) | PRODUCTO                                                                 | DURACIÓN                   | CONTROL DE HEMOGLOBINA                             |
|-------------------------------------------|------------------------|----------------------------------|--------------------------------------------------------------------------|----------------------------|----------------------------------------------------|
| Niño prematuro y/o con bajo peso al nacer | Desde 30 días de edad  | 4 mg/Kg/día                      | Gotas de Sulfato Ferroso<br>o<br>Gotas de Complejo Polimaltosado Férrico | Durante 6 meses continuos. | A los 3 meses y 6 meses de iniciado el tratamiento |

TREATMENT IN CHILDREN UNDER 6 MONTHS OF AGE WITH GOOD WEIGHT

| CONDICIÓN                                   | EDAD DE ADMINISTRACIÓN                                           | DOSIS <sup>3</sup><br>(Vía oral)          | PRODUCTO                                                                 | DURACIÓN                   | CONTROL DE HEMOGLOBINA                                      |
|---------------------------------------------|------------------------------------------------------------------|-------------------------------------------|--------------------------------------------------------------------------|----------------------------|-------------------------------------------------------------|
| Niño a término y con adecuado peso al nacer | Cuando se diagnostique anemia<br>(a los 4 meses o en el control) | 3 mg/Kg/día<br><br>Máxima dosis 40 mg/día | Gotas de Sulfato Ferroso<br>o<br>Gotas de Complejo Polimaltosado Férrico | Durante 6 meses continuos. | Al mes, a los 3 meses y 6 meses de iniciado el tratamiento. |

TREATMENT IN CHILDREN FROM 6 MONTHS TO 11 YEARS WITH MILD OR MODERATE ANEMIA

| EDAD DE ADMINISTRACIÓN        | DOSIS <sup>4</sup><br>(Vía oral)                | PRODUCTO                                                                                                                                                    | DURACIÓN                  | CONTROL DE HEMOGLOBINA                                     |
|-------------------------------|-------------------------------------------------|-------------------------------------------------------------------------------------------------------------------------------------------------------------|---------------------------|------------------------------------------------------------|
| Niños de 6 a 35 meses de edad | 3 mg/Kg/día<br><br>Máxima dosis: 70 mg/día (2)  | Jarabe de Sulfato Ferroso<br>o<br>Jarabe de Complejo Polimaltosado Férrico<br>o<br>Gotas de Sulfato Ferroso<br>o<br>Gotas de Complejo Polimaltosado Férrico | Durante 6 meses continuos | Al mes, a los 3 meses y 6 meses de iniciado el tratamiento |
| Niños de 3 a 5 años de edad   | 3 mg/Kg/día<br><br>Máxima dosis: 90 mg/día (3)  | Jarabe de Sulfato Ferroso<br>o<br>Jarabe de Complejo Polimaltosado Férrico                                                                                  |                           |                                                            |
| Niños de 5 a 11 años          | 3 mg/Kg/día<br><br>Máxima dosis: 120 mg/día (4) | Jarabe de Sulfato Ferroso<br>o<br>Jarabe de Complejo Polimaltosado Férrico<br>o<br>1 tableta de Sulfato ferroso<br>o<br>1 tableta de Polimaltosado          |                           |                                                            |

TREATMENT IN ADOLESCENTS AGED 12 TO 17 YEARS WITH MILD AND MODERATE ANEMIA

| EDAD DE ADMINISTRACIÓN                           | DOSIS                                           | PRODUCTO                      | DURACIÓN                  | CONTROL DE HEMOGLOBINA                                            |
|--------------------------------------------------|-------------------------------------------------|-------------------------------|---------------------------|-------------------------------------------------------------------|
| Adolescentes (Hombres y Mujeres) de 12 a 17 años | 2 tabletas diarias (120 mg de hierro elemental) | 2 tabletas de Sulfato Ferroso | Durante 6 meses continuos | Al mes, a los 3 meses y a los 6 meses de iniciado el tratamiento. |

PREVENTIVE SUPPLEMENTATION WITH IRON AND FOLIC ACID IN PREGNANT AND POSTPARTUM WOMEN

| INICIO ADMINISTRACIÓN                                           | DOSIS                                                      | PRODUCTO                                                                                                     | DURACIÓN                                        |
|-----------------------------------------------------------------|------------------------------------------------------------|--------------------------------------------------------------------------------------------------------------|-------------------------------------------------|
| Gestantes a partir de la semana 14 de gestación                 | 60 mg de hierro elemental<br>+<br>400 ug. de Ácido Fólico  | Tableta de Sulfato Ferroso<br>+<br>Ácido Fólico<br>o<br>Tableta de Hierro Polimaltosado<br>+<br>Ácido Fólico | 1 tableta al día hasta los 30 días post parto   |
| Gestantes que inician atención prenatal después de la semana 32 | 120 mg de hierro elemental<br>+<br>800 ug. de Ácido Fólico |                                                                                                              | 2 tabletas al día hasta los 30 días post parto. |
| Puérperas                                                       | 60 mg de hierro elemental<br>+<br>400 ug. de Ácido Fólico  |                                                                                                              | 1 tableta al día hasta los 30 días post parto   |

TREATMENT OF ANEMIA WITH IRON AND FOLIC ACID IN PREGNANT AND POSTPARTUM WOMEN

| CONDICION DE ANEMIA | DOSIS                                                                                                                                                         | PRODUCTO                                                             | DURACION        | CONTROL DE HEMOGLOBINA                                                                                        |
|---------------------|---------------------------------------------------------------------------------------------------------------------------------------------------------------|----------------------------------------------------------------------|-----------------|---------------------------------------------------------------------------------------------------------------|
| Anemia Leve         | 120 mg de hierro elemental + 800 µg de Ácido Fólico Diario (2 tabletas diarias)                                                                               | Sulfato Ferroso + Ácido Fólico o Hierro Polimaltosado + Ácido Fólico | Durante 6 meses | Cada 4 semanas hasta que la hemoglobina alcance valores de 11 g/dl o más (valores ajustados a los 1000 msnm). |
| Anemia Moderada     |                                                                                                                                                               | Hierro Polimaltosado + Ácido Fólico                                  |                 |                                                                                                               |
| Anemia Severa       | Tratar inmediatamente como caso de anemia y referir a un establecimiento de mayor complejidad que brinde atención especializada (hematología y/o ginecología) |                                                                      |                 |                                                                                                               |

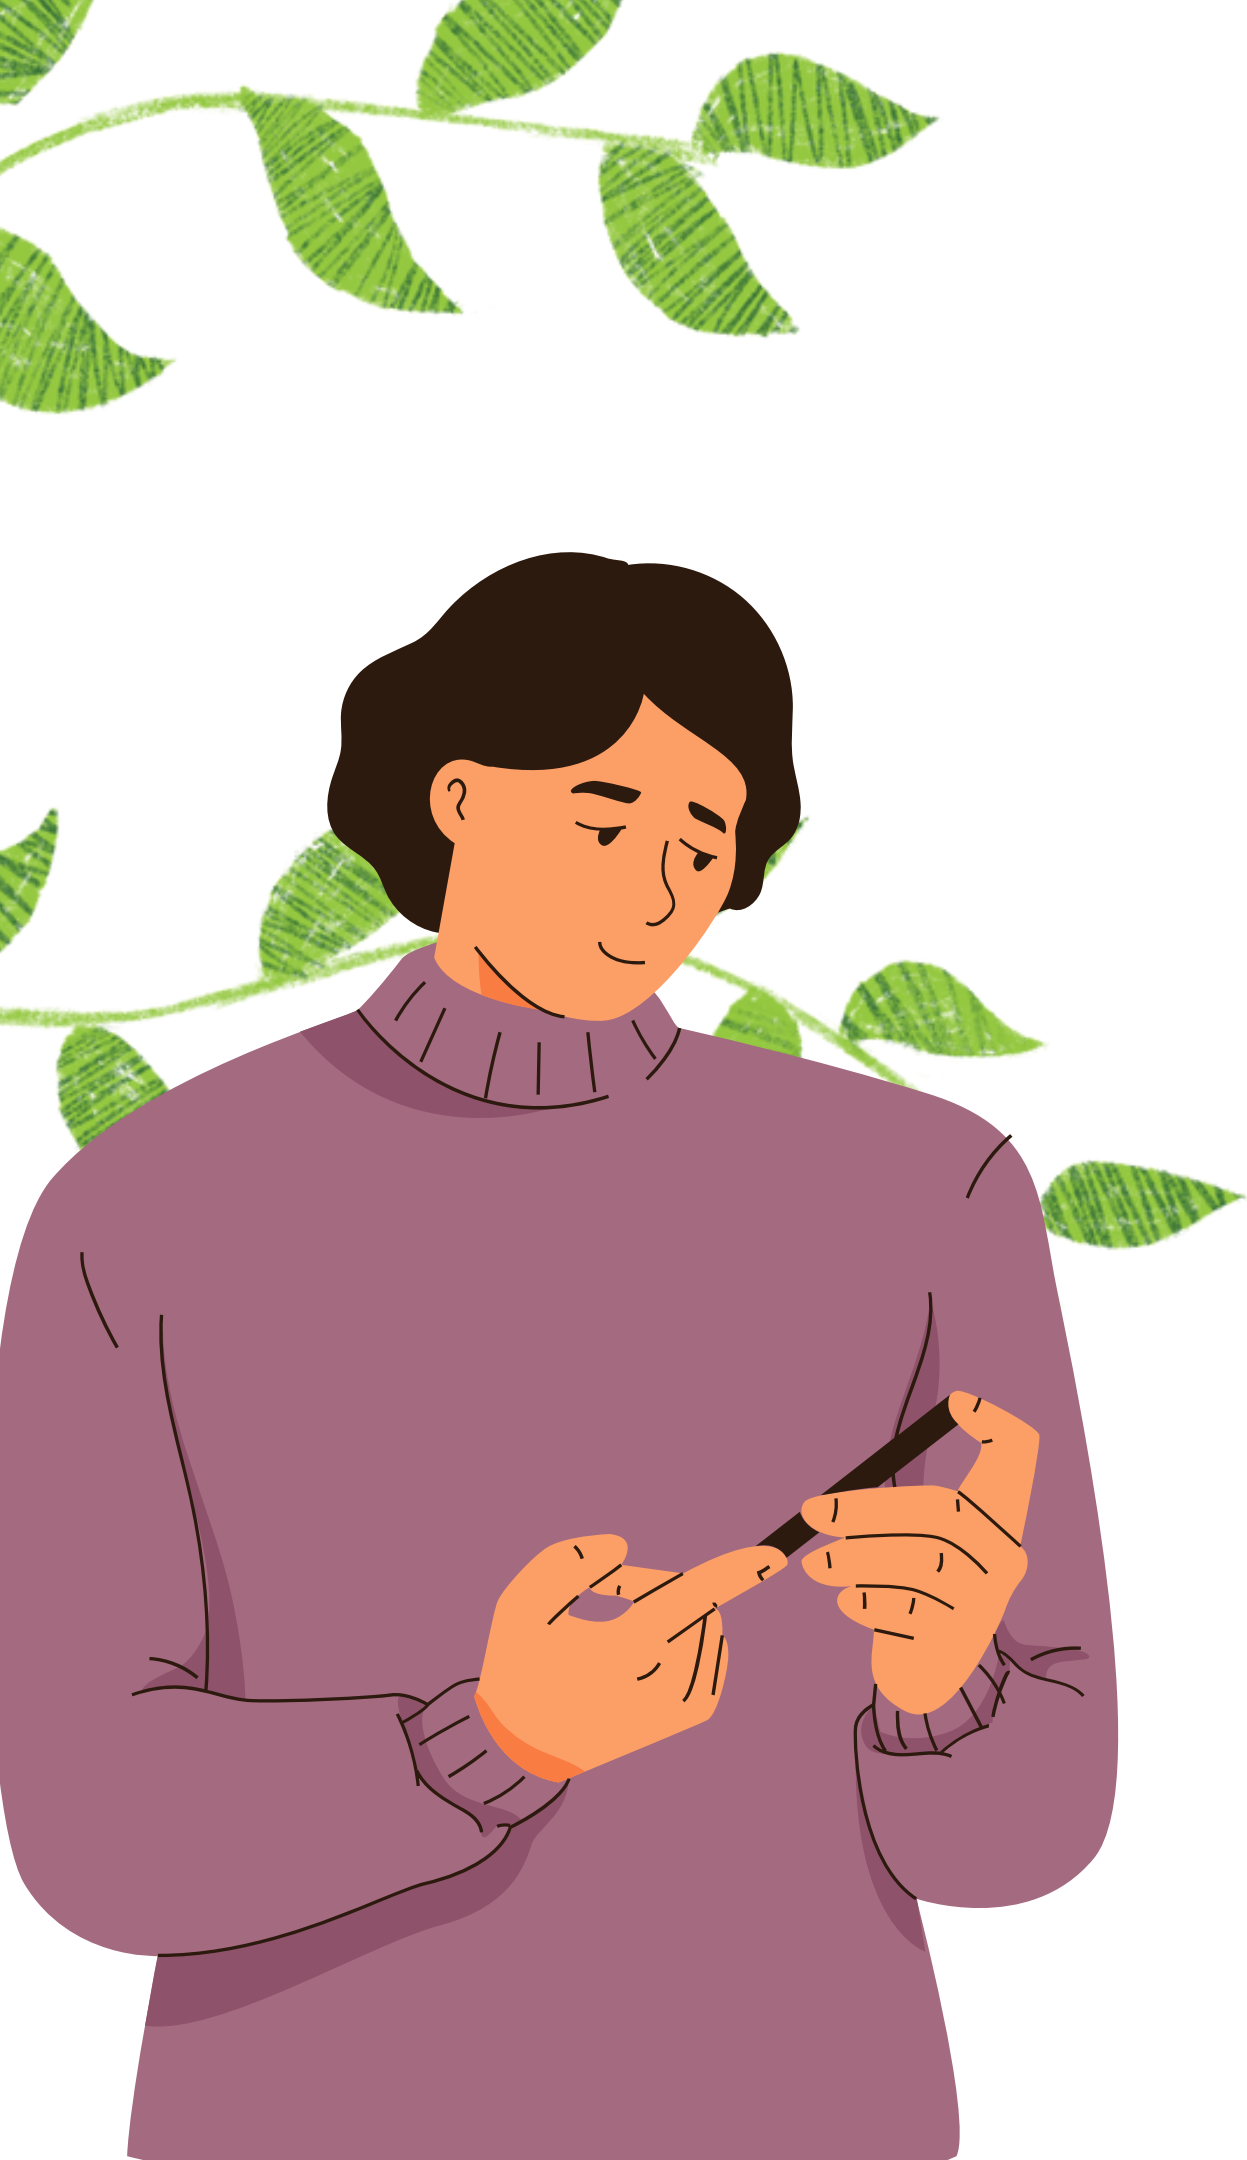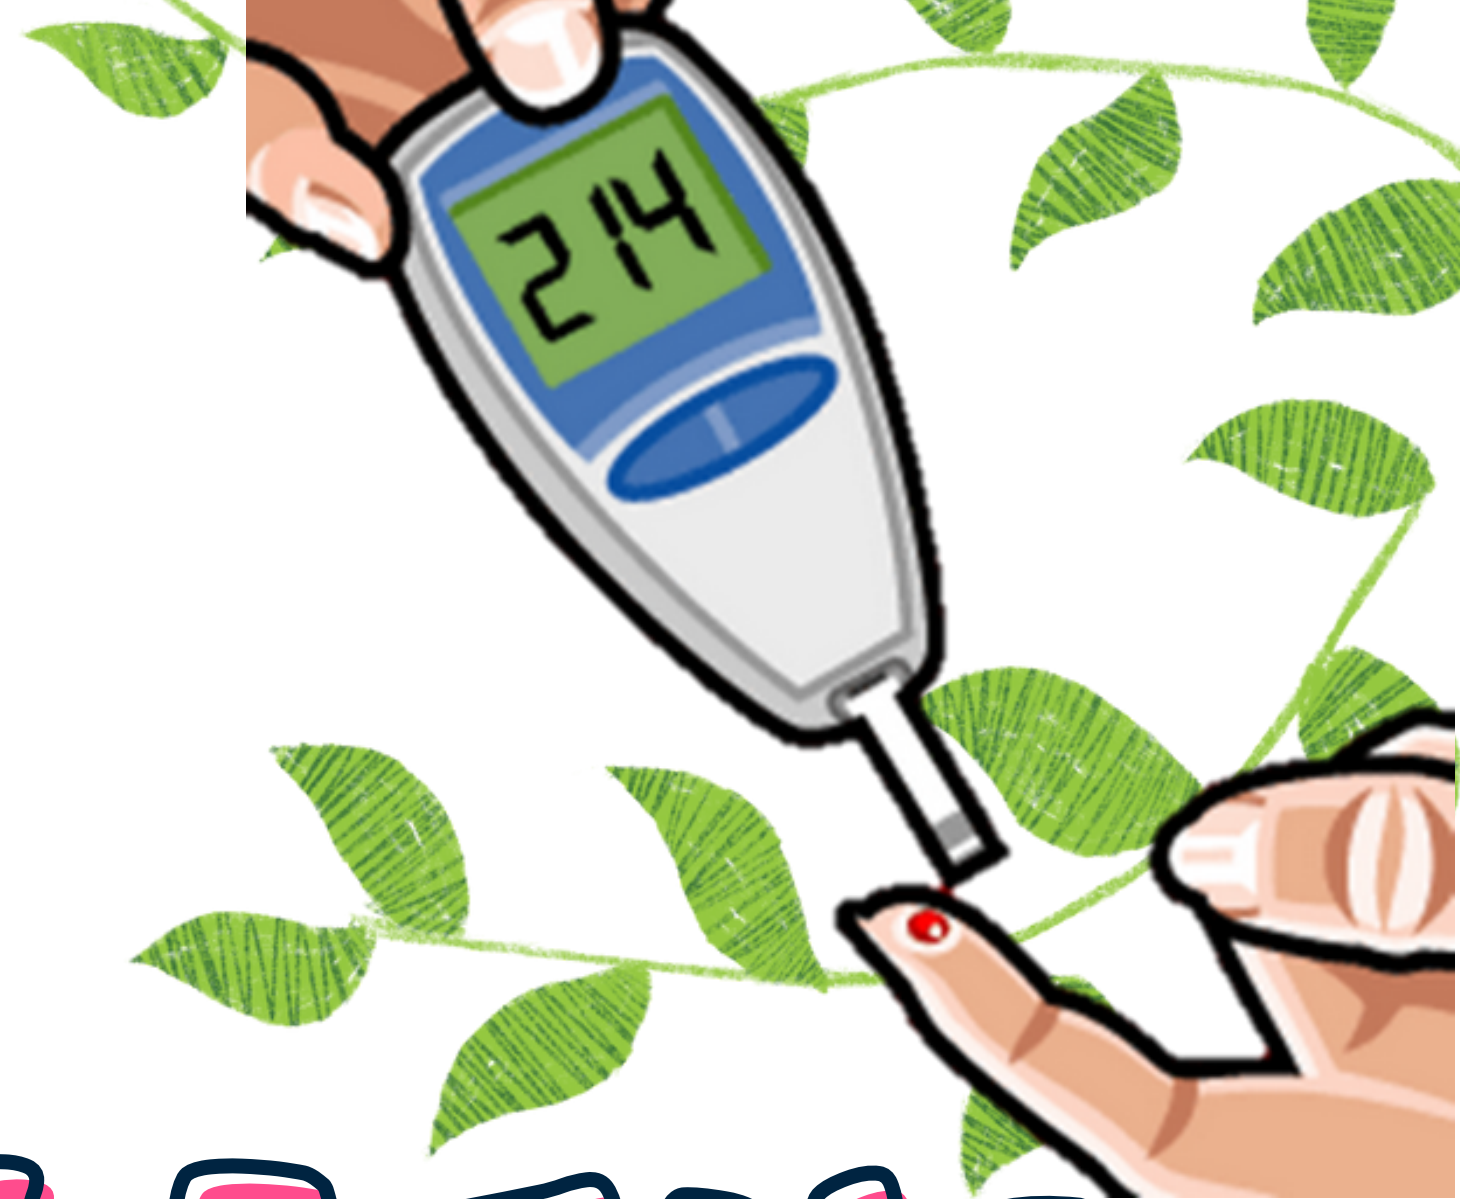

# MELLITUS DIABETES

# WHAT IS THE DIABETES?

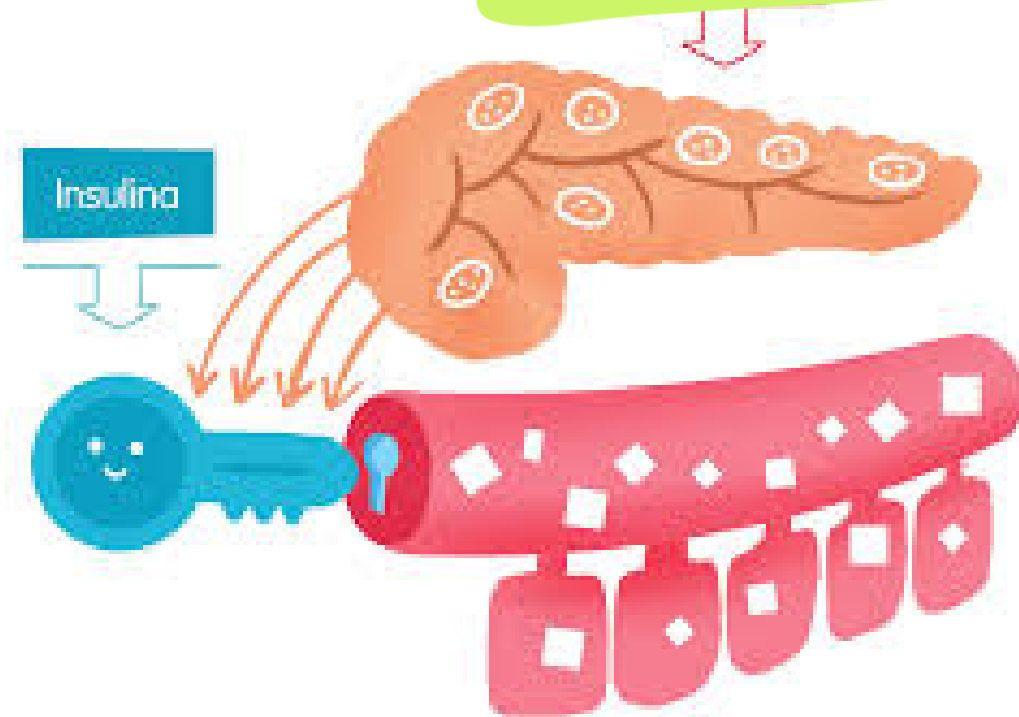

It is a group of diseases characterized by elevated blood glucose concentrations resulting from a defect in insulin secretion, insulin action, or both.

## GUYS

### DIABETES GUY 1:

Chronic condition in which the pancreas produces little or no insulin.

### DIABETES GUY 2:

Insulin resistance and beta cell dysfunction (insulin deficiency)

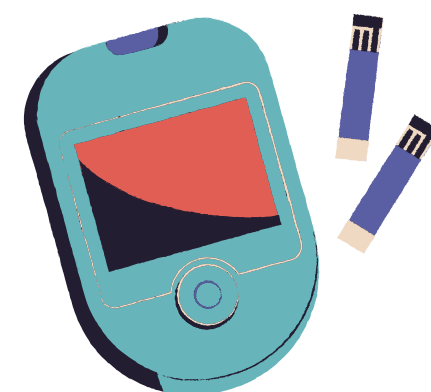

## BIOCHEMICAL VALUES

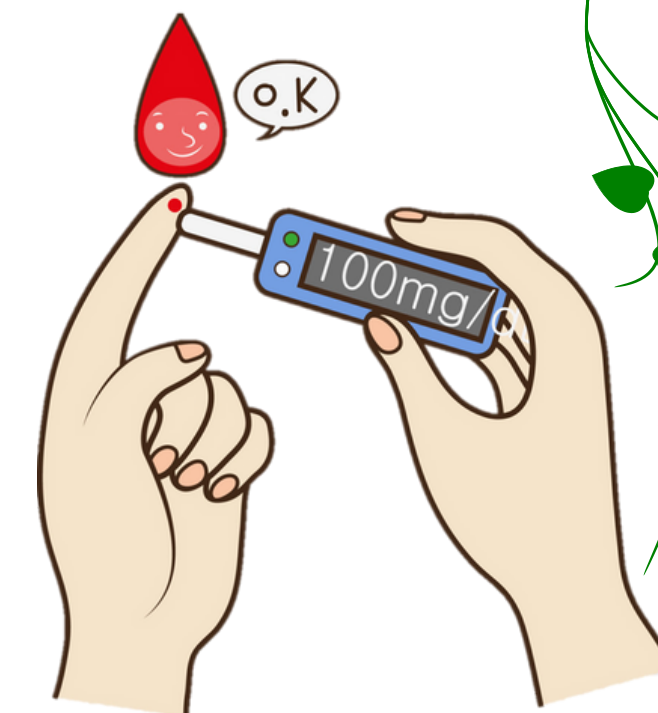

| Criterion                     | Normal range   |
|-------------------------------|----------------|
| Fasting plasma glucose        | 70 a 100 mg/dl |
| Glucosa a 2 h                 | < 140 gg/dl    |
| Glycosylated hemoglobin (A1C) | 4 a 5.6%       |

## SIGNS AND SYMPTOMS

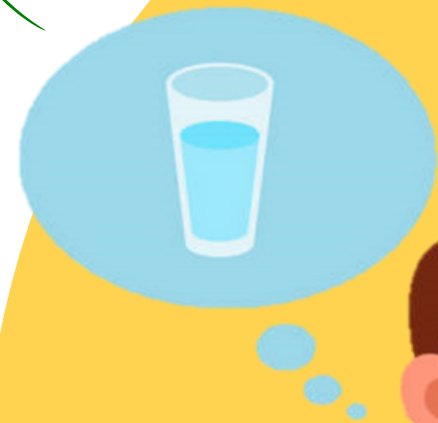

**Polydipsia  
(very thirsty)**

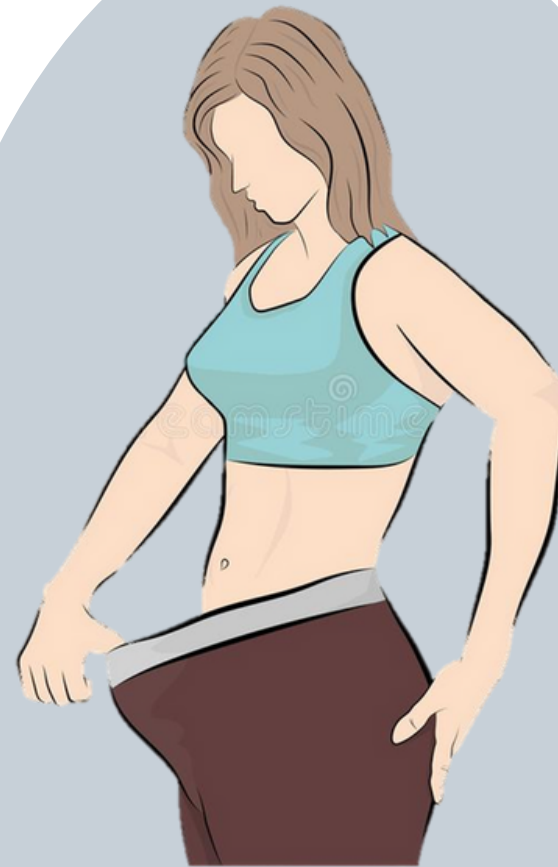

**Weightloss**

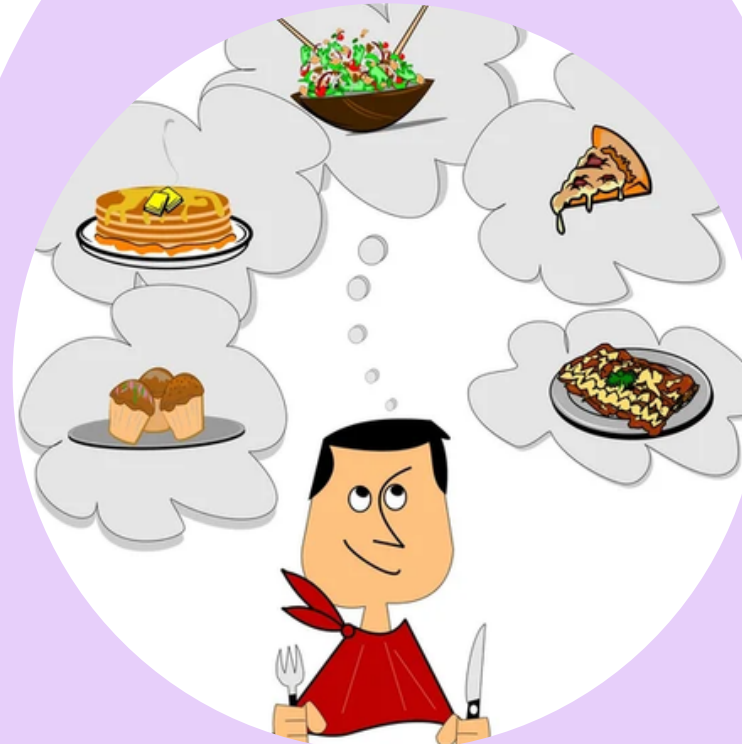

**Polyphagia (Very  
hungry)**

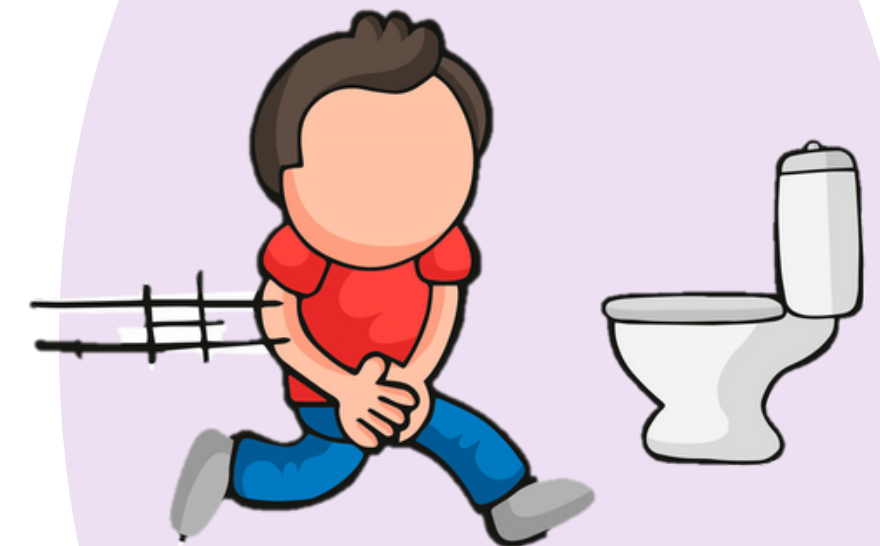

**Polyuria  
(Urinating a lot)**

## COMPLICATIONS

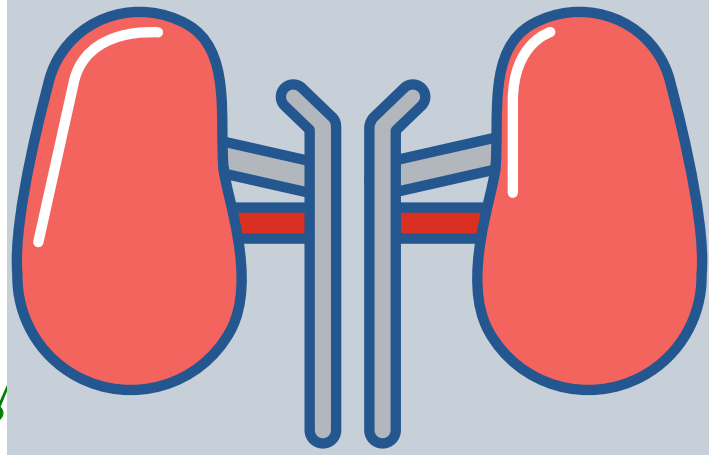

**Nephropathy or  
kidney damage**

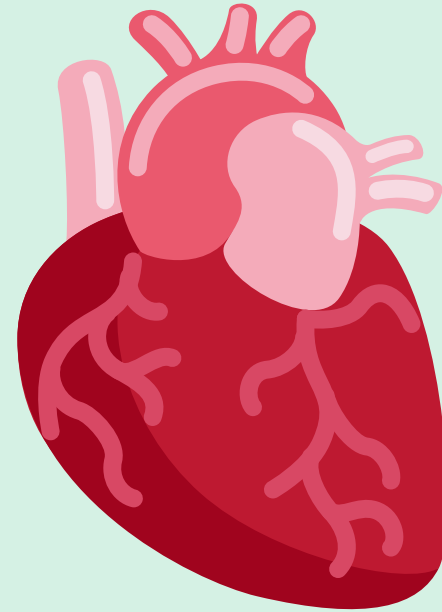

**Vesicular  
and cardiac**

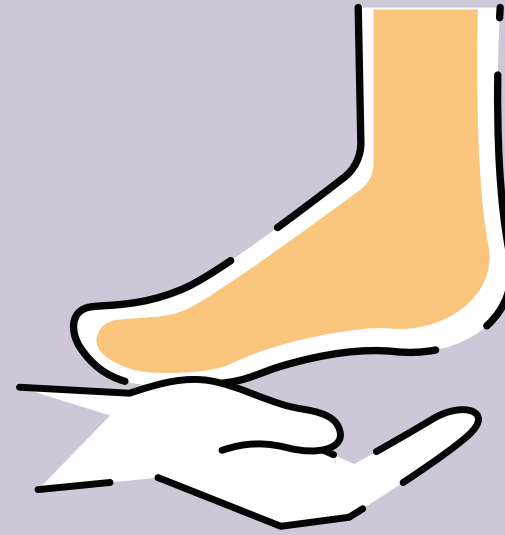

**Diabetic  
foot**

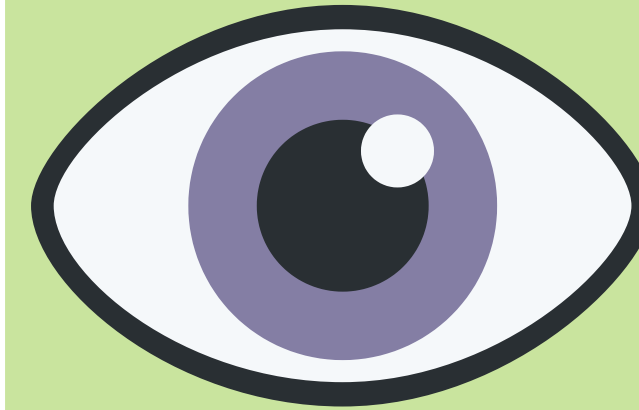

**Diabetic  
retinopathies or  
damage to the  
retina of the eye**

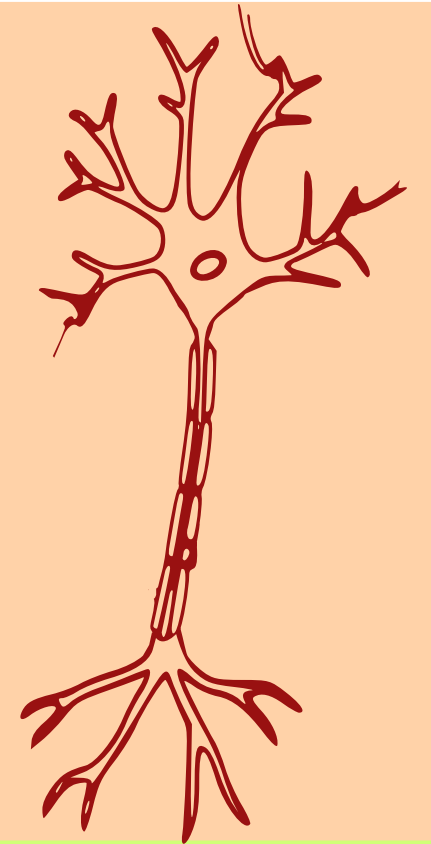

**Diabetic  
neuropathy or  
nerve damage**

# HOW TO CONTROL DIABETES MELLITUS?

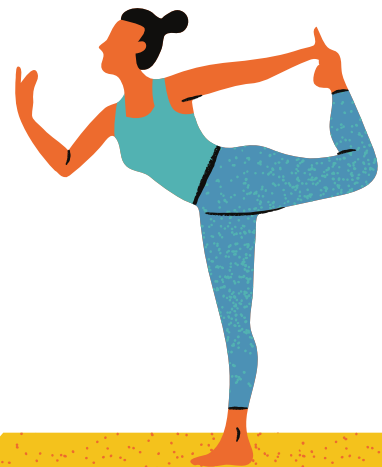

**Get physical activity**

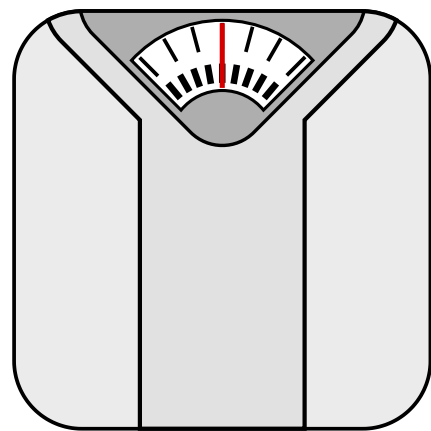

**Control your weight**

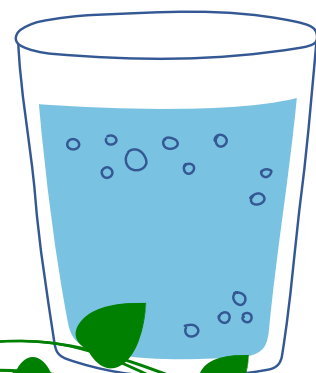

**Drink 8 glasses of water**

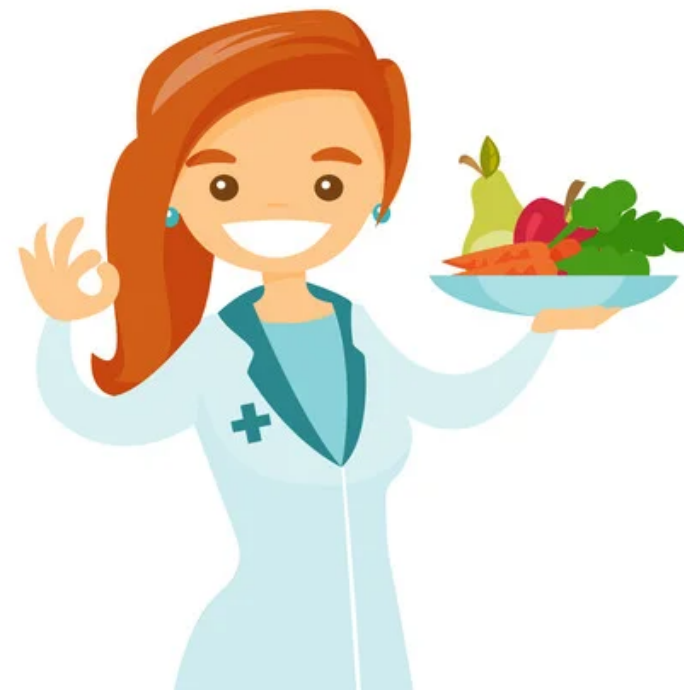

**Go to the nutritionist**

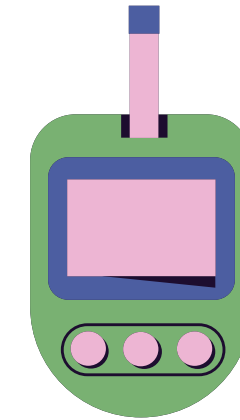

**Check your blood glucose frequently**

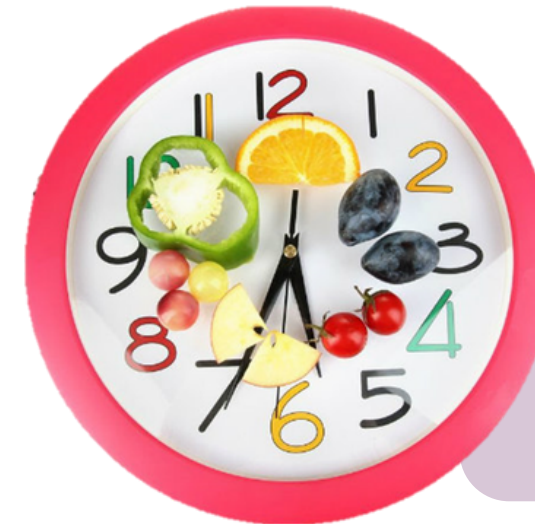

**Set your feeding schedules**

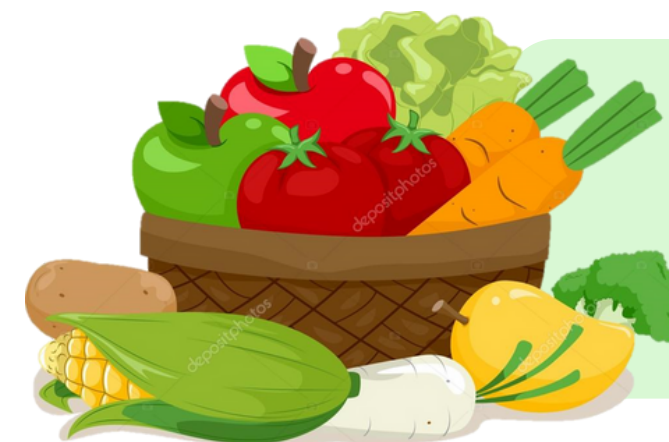

**Eat low-carb vegetables and fruits**

## **ACCIONES NO PERMITIDOS**

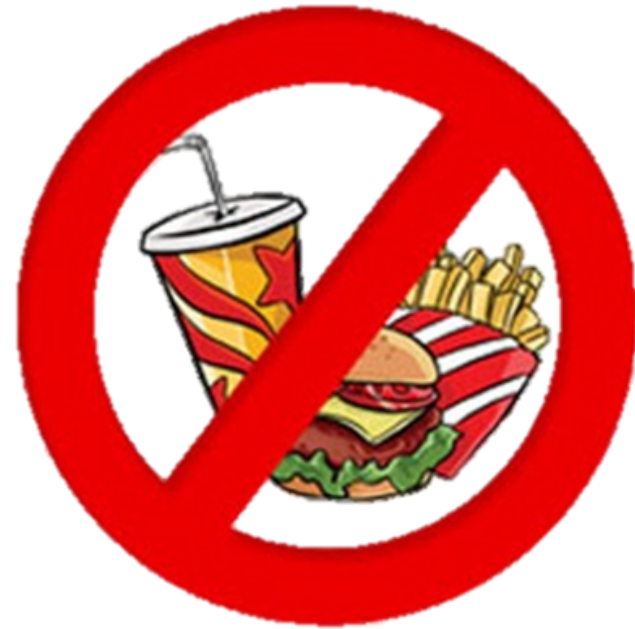

**Don't eat fried foods  
or fats**

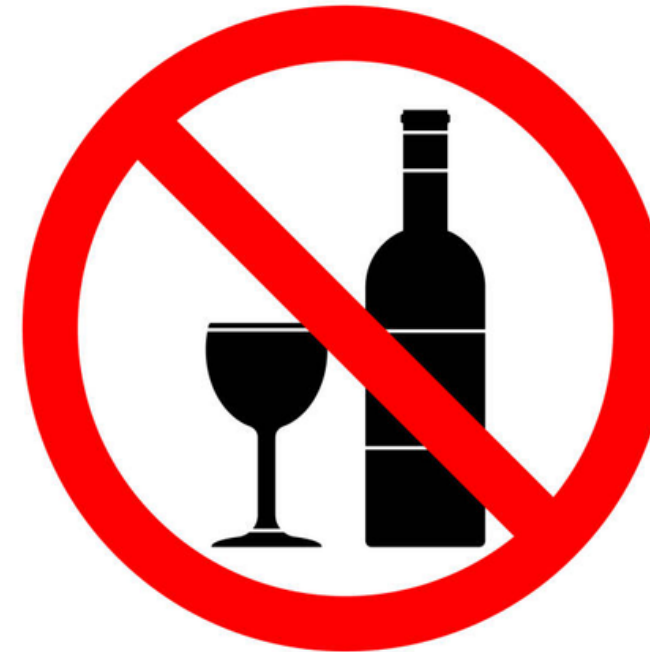

**Don't drink alcohol**

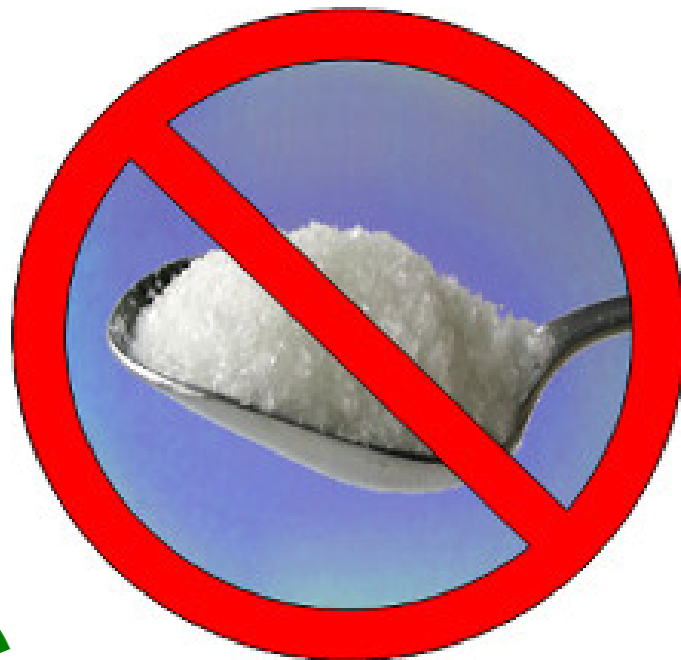

**Avoid consuming  
sugar and sugary  
products**

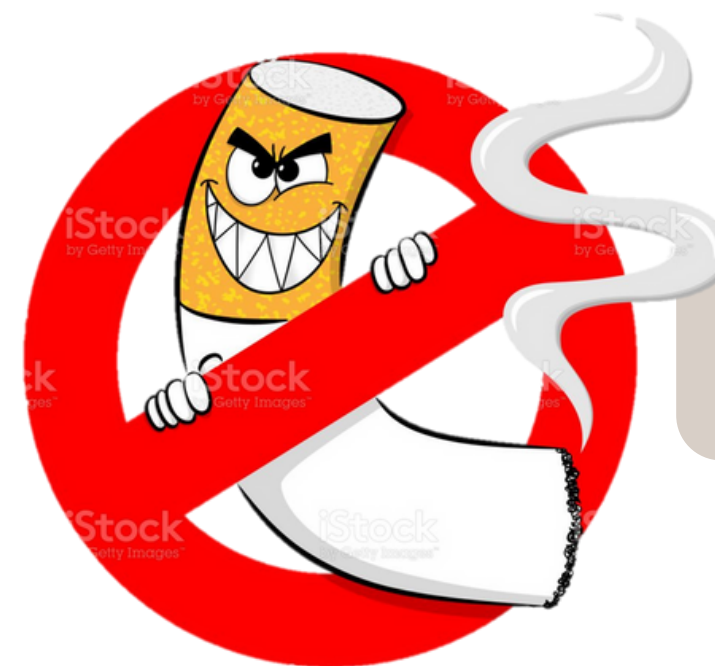

**Don't smoke**

# ARTERIAL HYPERTENSION

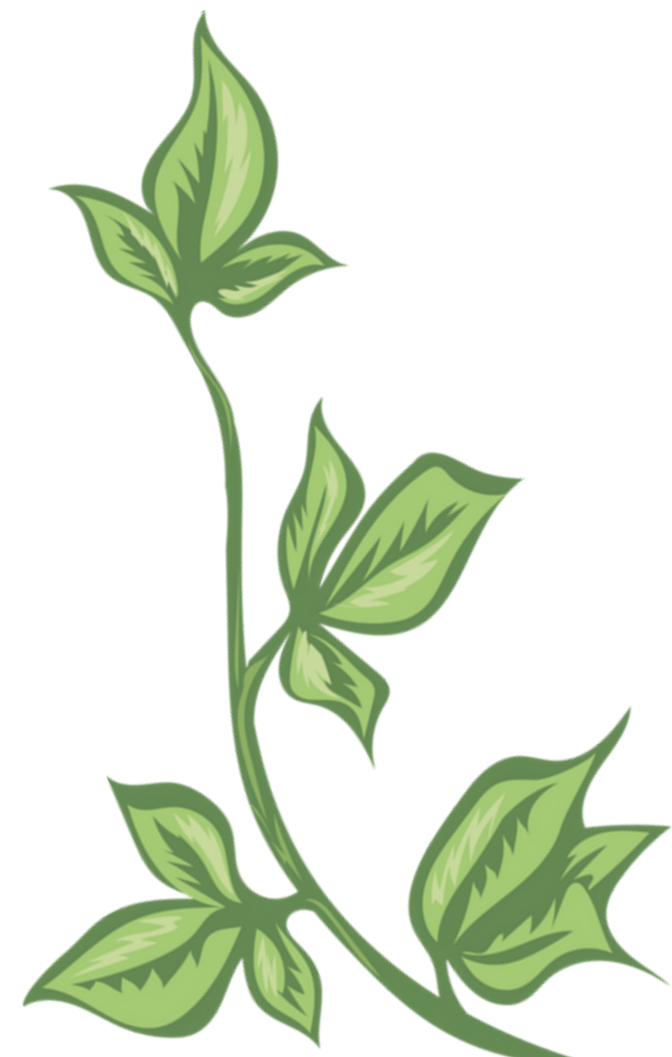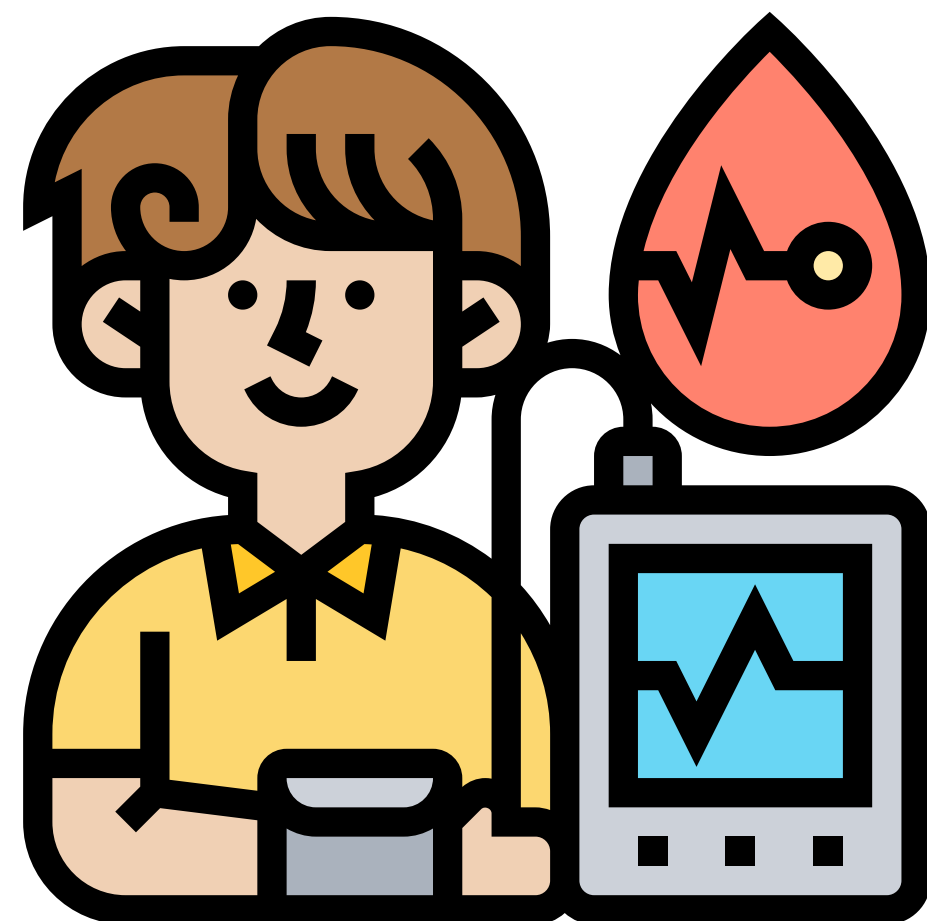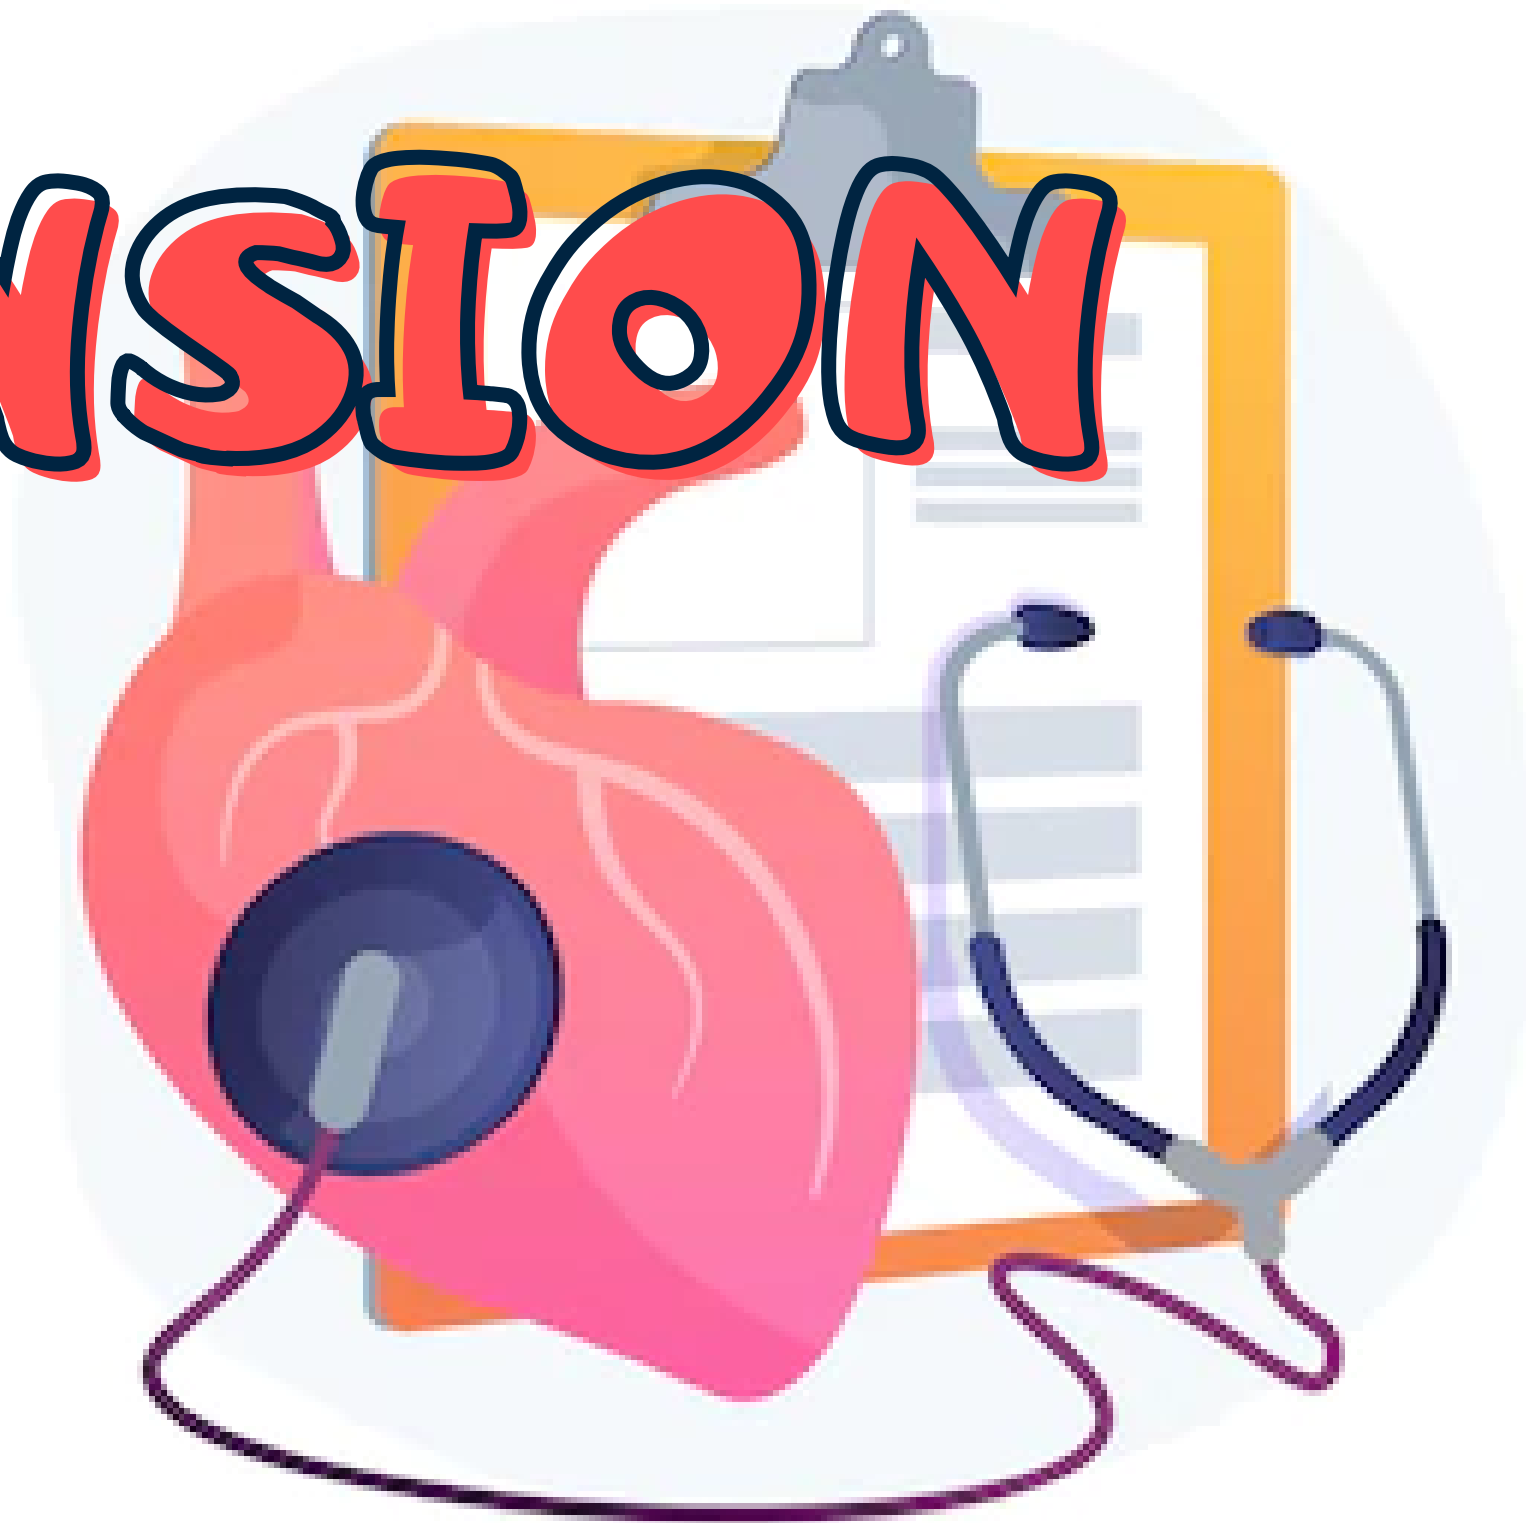

WHAT IS  
HYPERTENSION?

It is the persistent increase in blood pressure, the force exerted per unit area on the walls of the arteries.

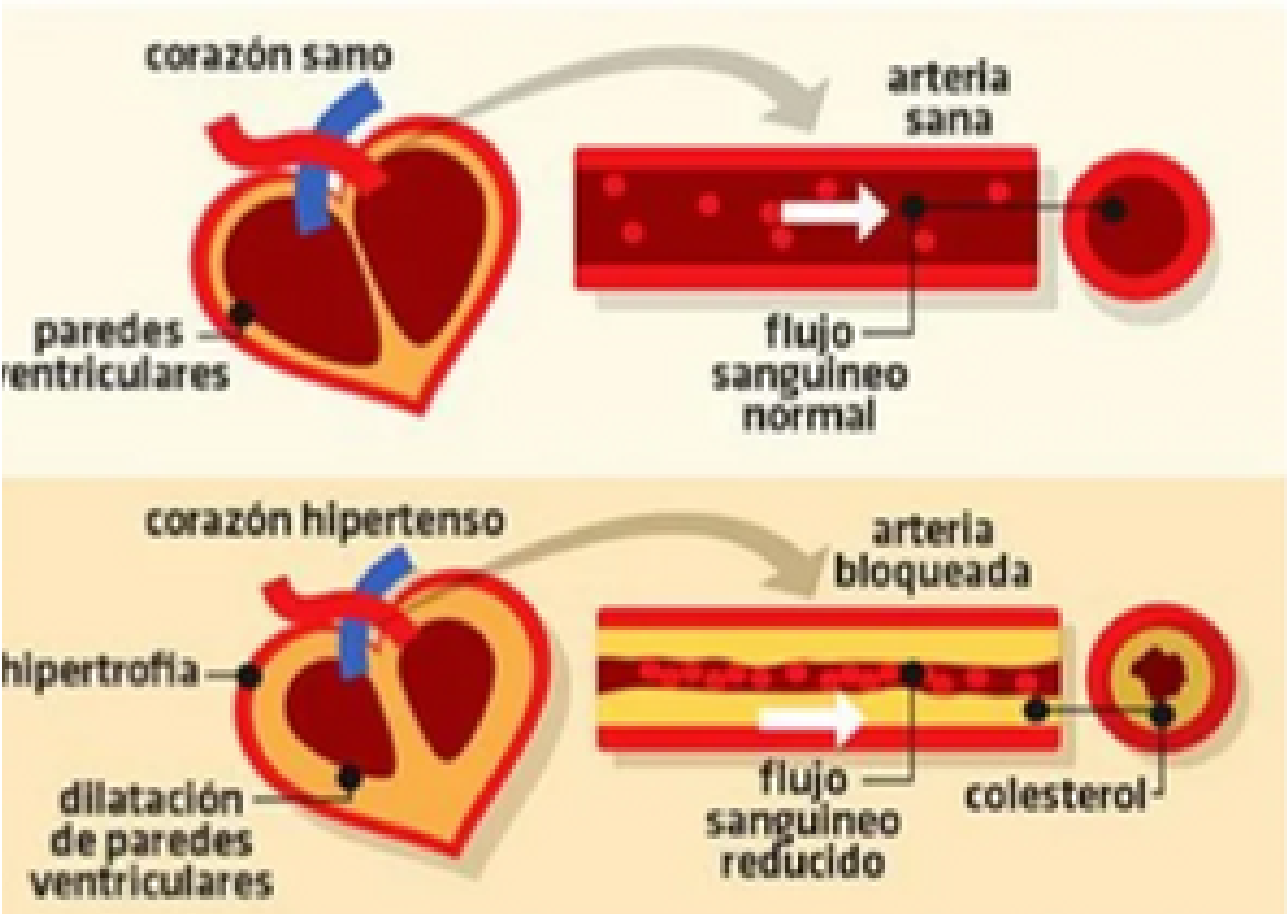

BLOOD PRESSURE

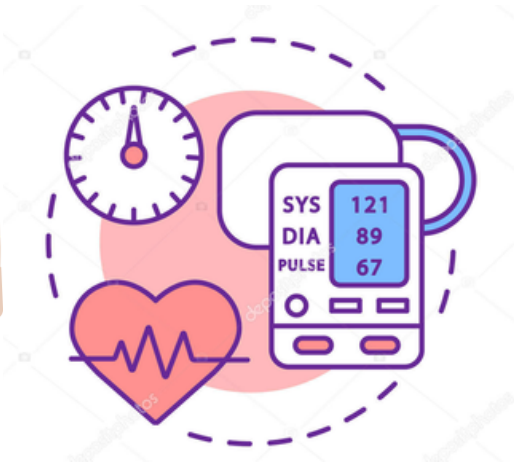

| Category        | SBP            | DBP          |
|-----------------|----------------|--------------|
| Optimum level   | <120 mmHg      | <80 mmHg     |
| Normal          | 120 a 129 mmHg | 80 a 84 mmHg |
| Prehypertensive | 130 a 139 mmHg | 85 a 89 mmHg |
| Prehypertensive | 130 a 139 mmHg | >=90 mmHg    |

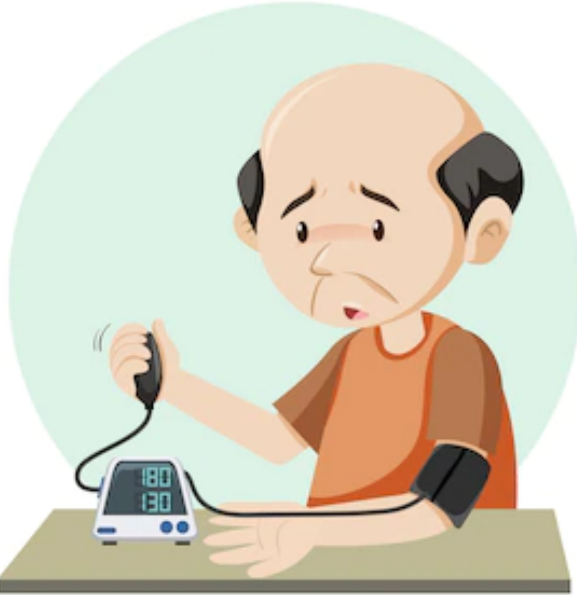

**SYSTOLIC BLOOD PRESSURE (SBP):**  
It is the force exerted on the walls of blood vessels as the heart contracts and propels blood through its chambers.

**DIASTOLIC BLOOD PRESSURE (DBP):**  
It measures the force as the heart relaxes between contractions.

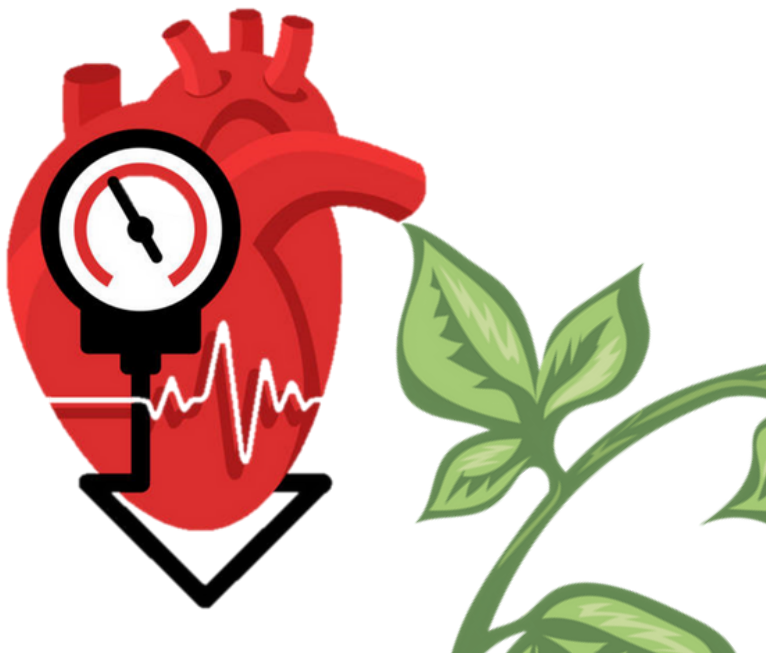

## SIGNS AND SYMPTOMS

**Headache**

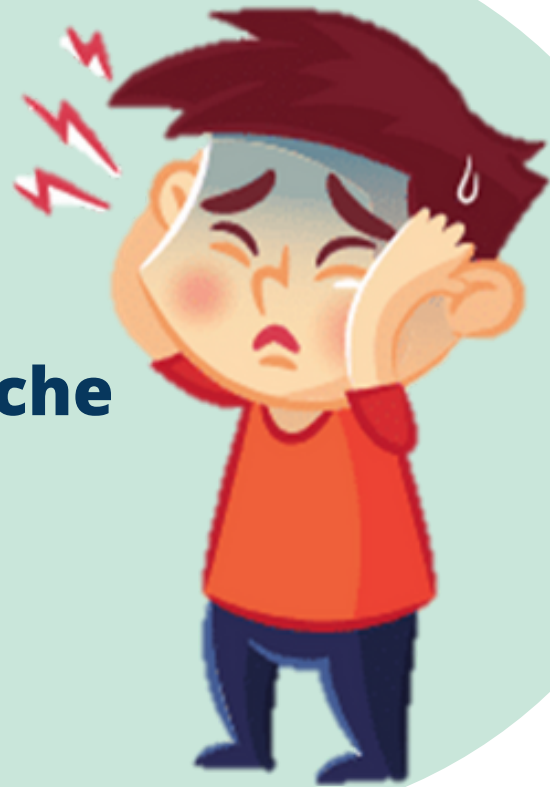

**Confusion**

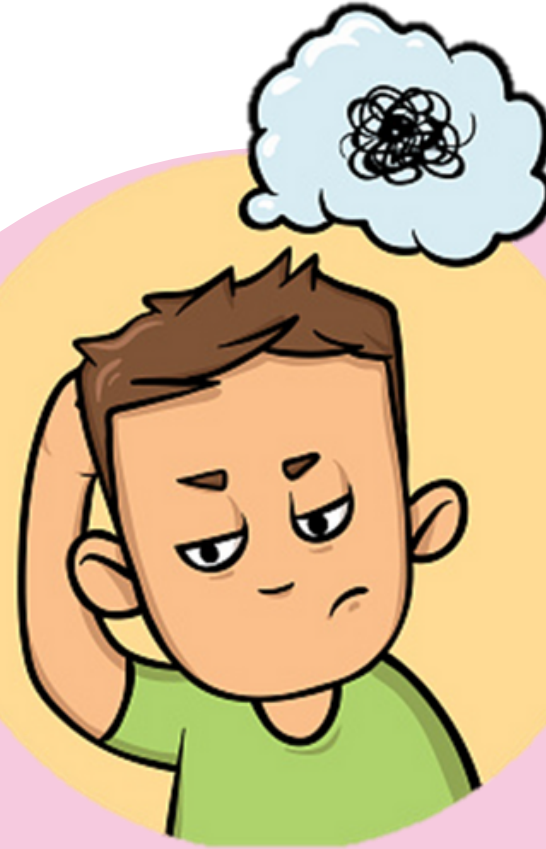

**Nausea or  
vomiting**

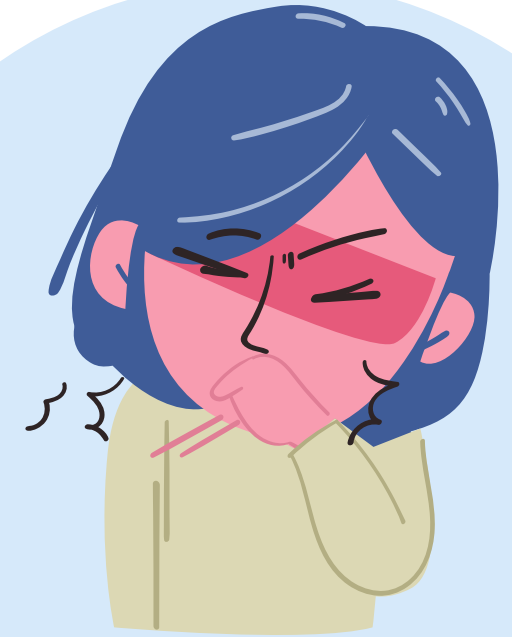

**Ringing or noise  
in the ear**

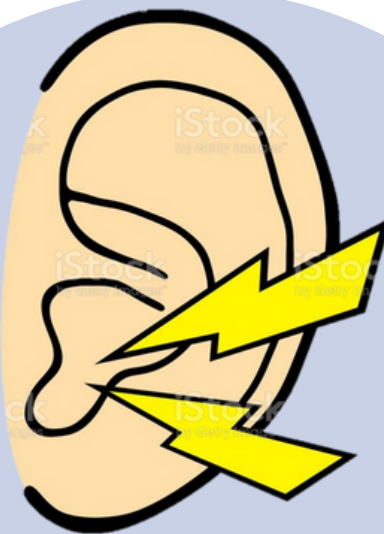

**Fatigue or  
tiredness**

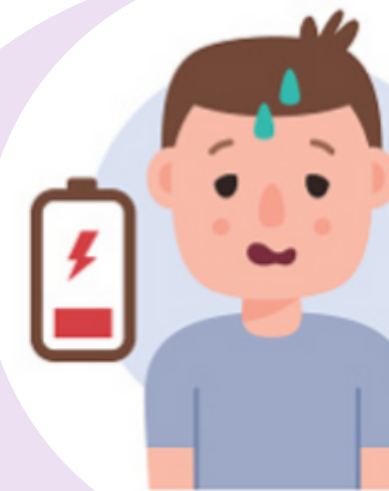

## COMPLICATIONS

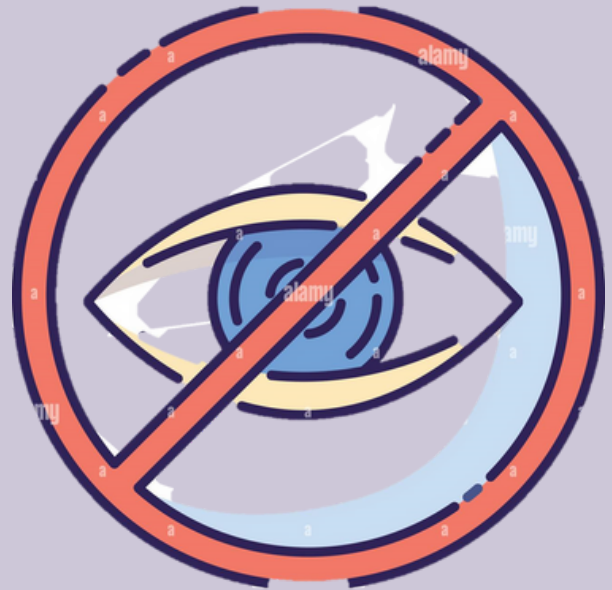

**Vision loss**

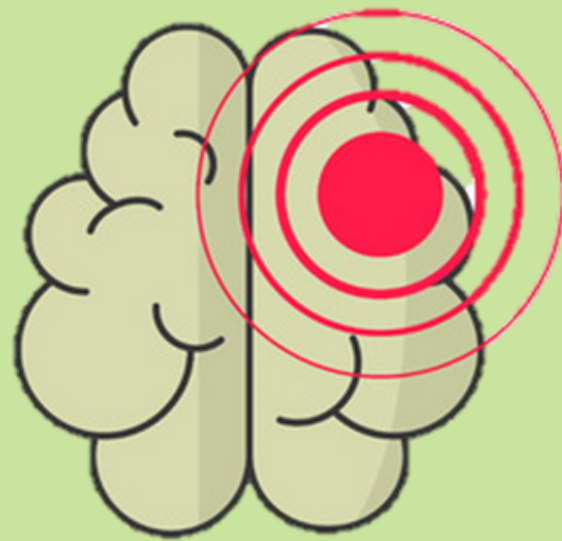

**Stroke**

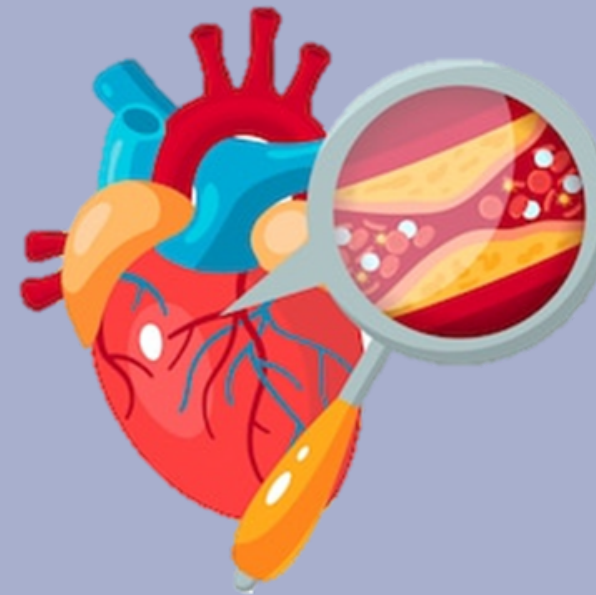

**Atherosclerosis**

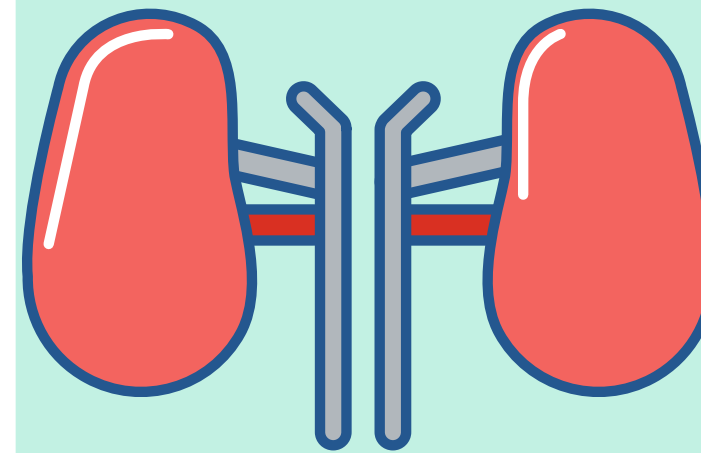

**Renal  
insufficiency**

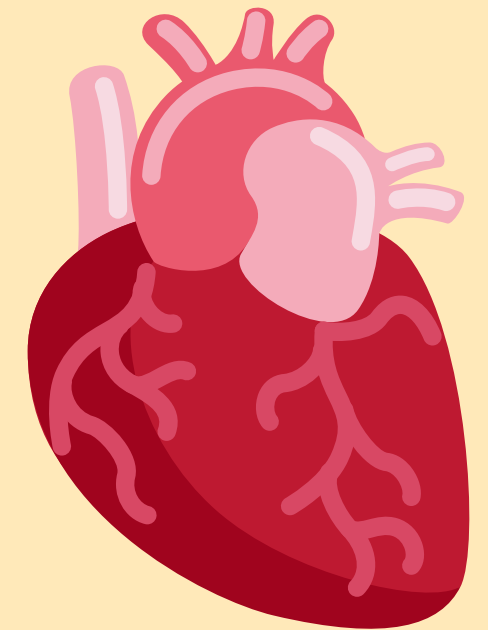

**Myocardial  
infarction**

# HOW TO CONTROL ARTERIAL HYPERTENSION?



**Get physical activity**



**Perform blood pressure checks**

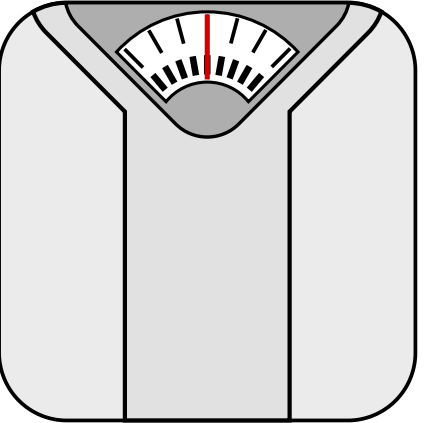

**Control your weight**



**Set your feeding schedules**



**Go to the nutritionist**



**Drink 8 glasses of water**



**Maintain a healthy diet, consume between 5 fruits and vegetables**

## **ACTIONS NOT ALLOWED**

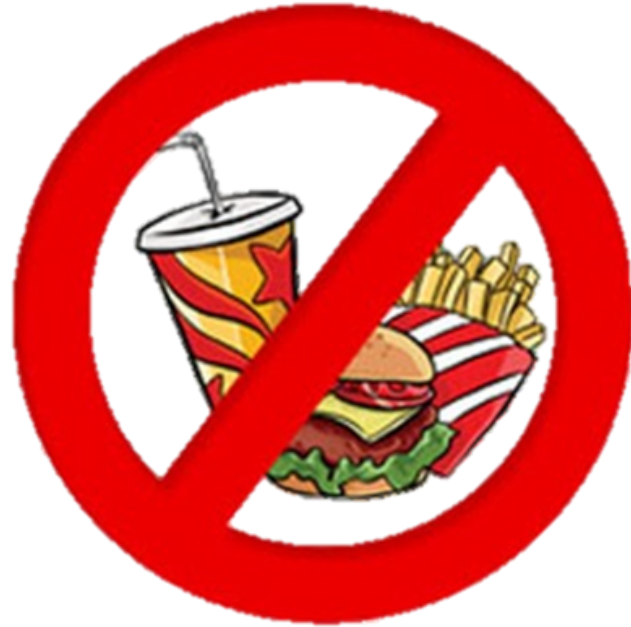

**Don't eat fried foods  
or fats**

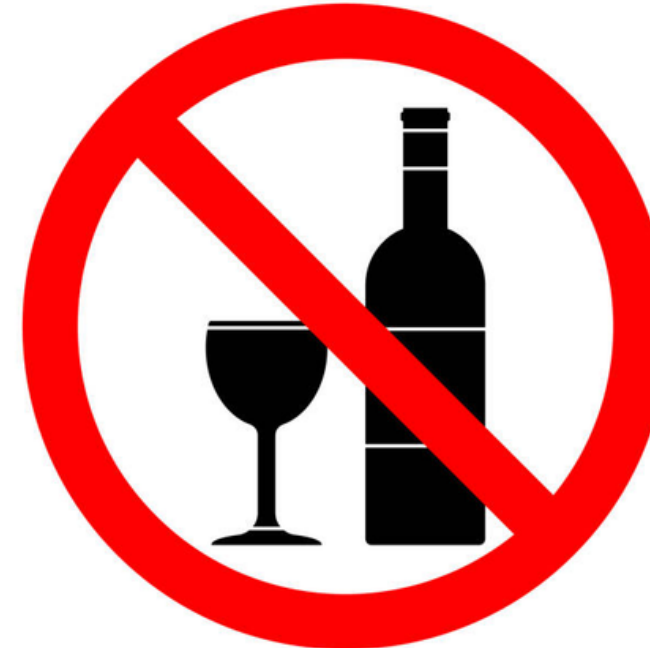

**Don't drink alcoholl**

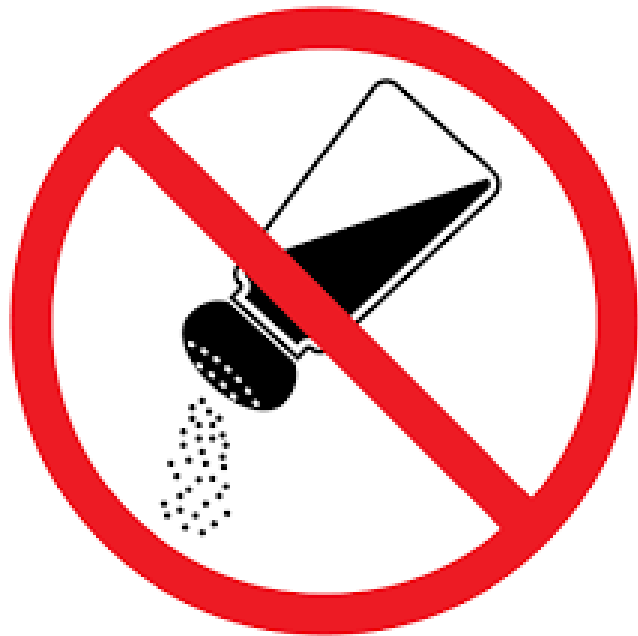

**Don't add salt to  
foods**

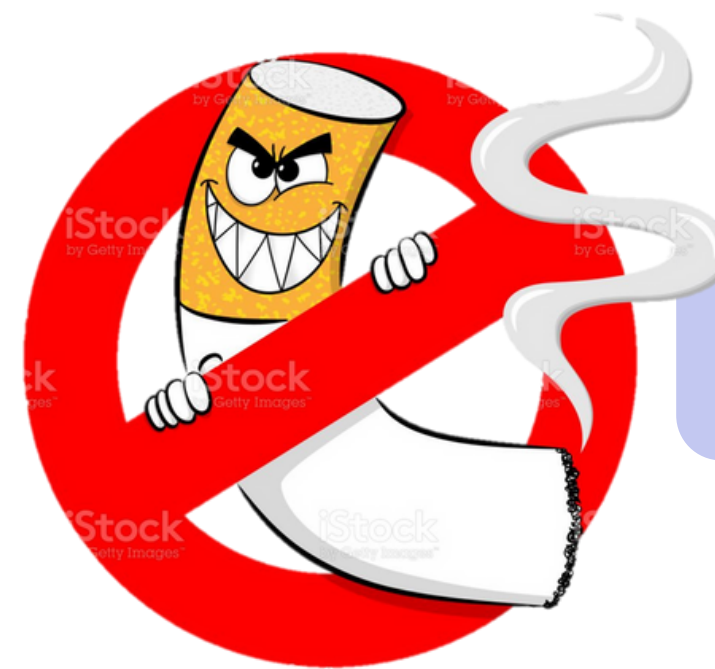

**Don't smoke**

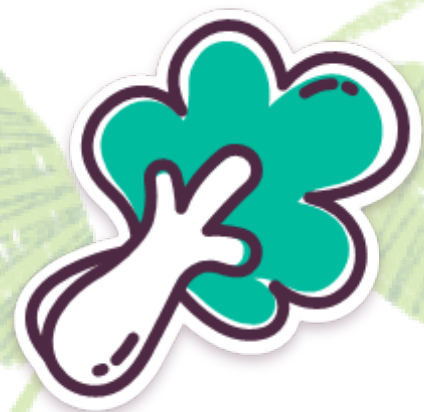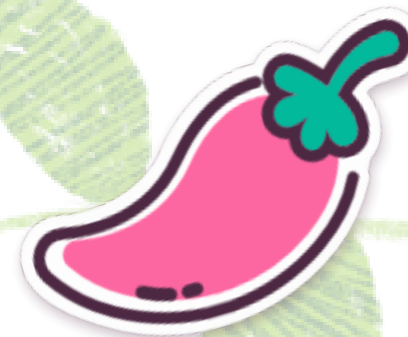

# Good Handling Practices

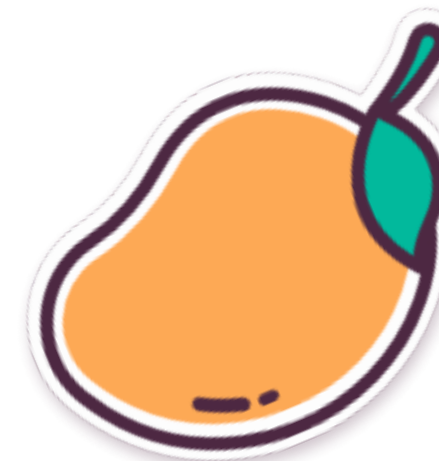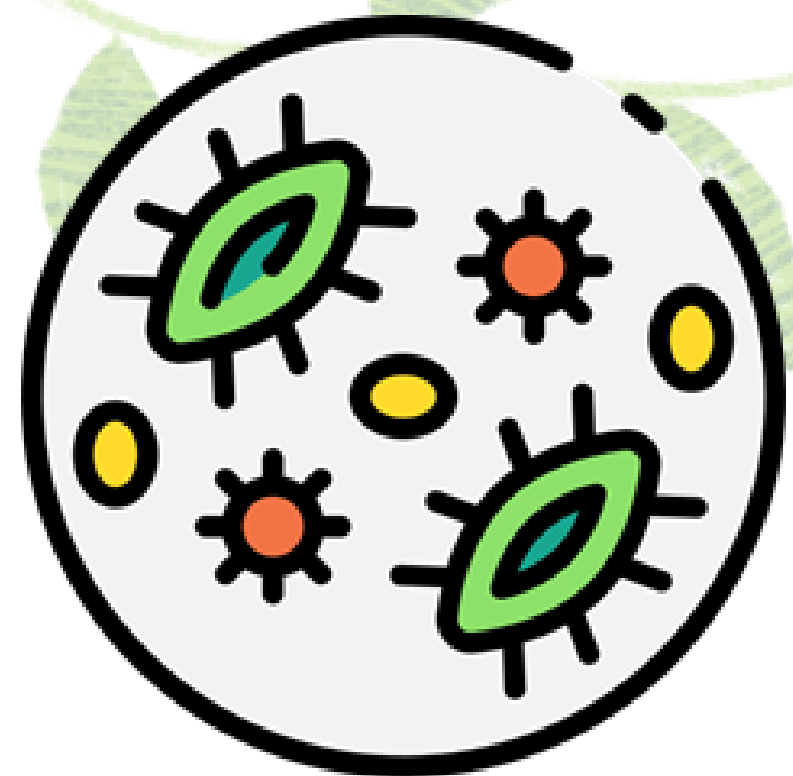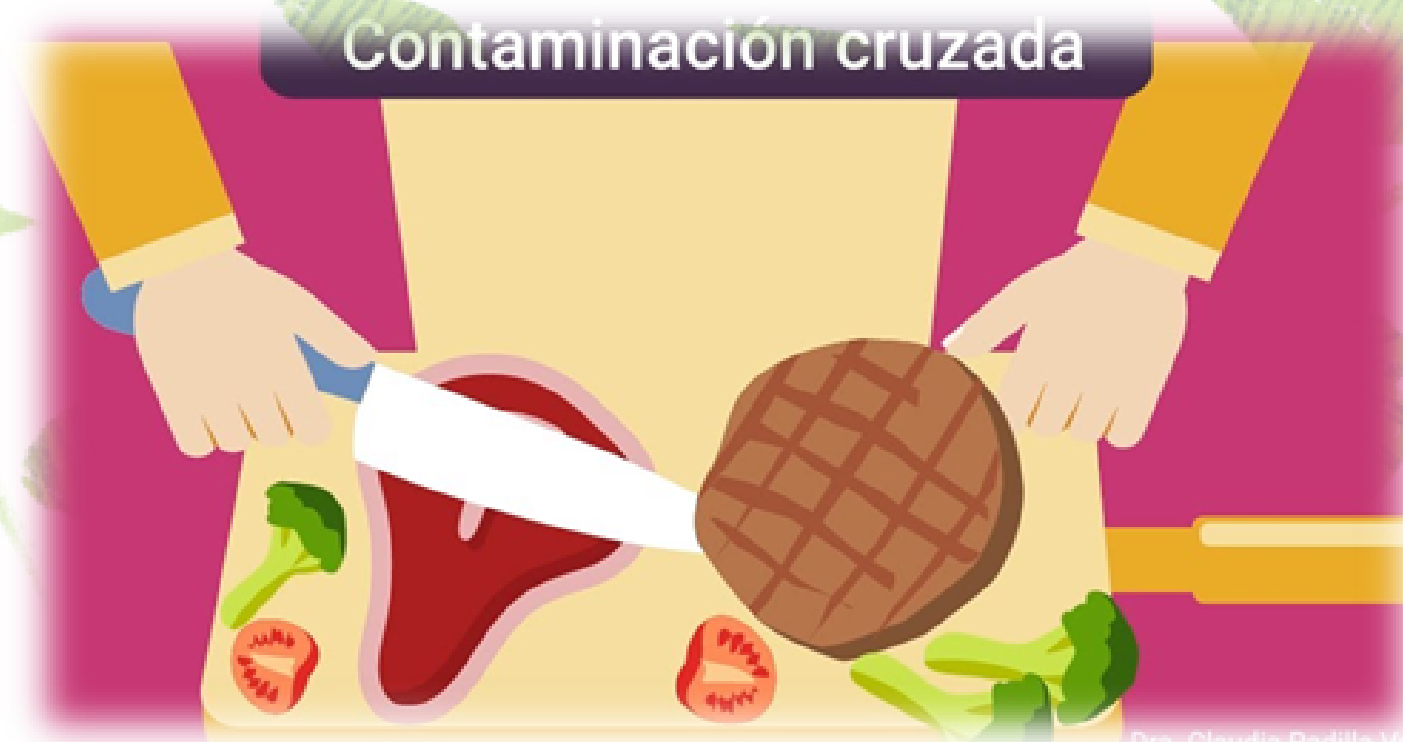

## WHAT IS FOOD HYGIENE?

It is the set of practices before, during and after food preparation that help us prevent diseases

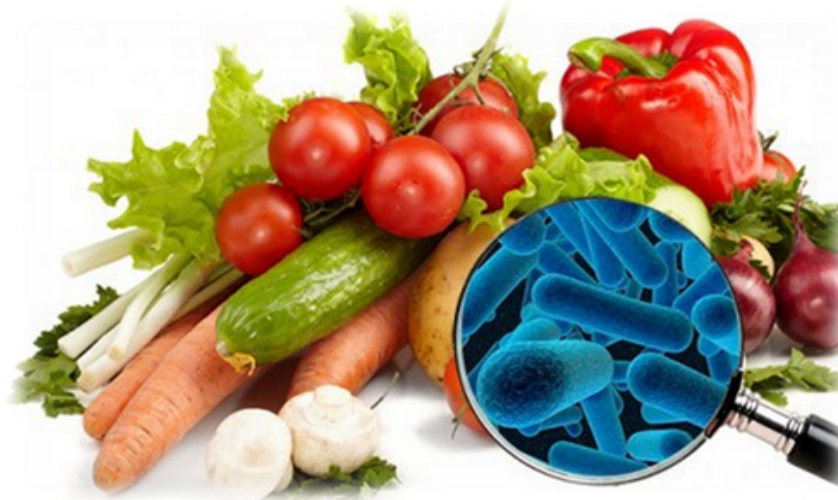

## What is cross contamination?

It is the transfer of a danger present in one food to another that was safe, using as a vehicle surfaces or utensils that have been in contact with both foods without the proper cleaning and disinfection required.

## What are the symptoms of foodborne illnesses?

The symptomatology of a disease varies by incorporating different variables

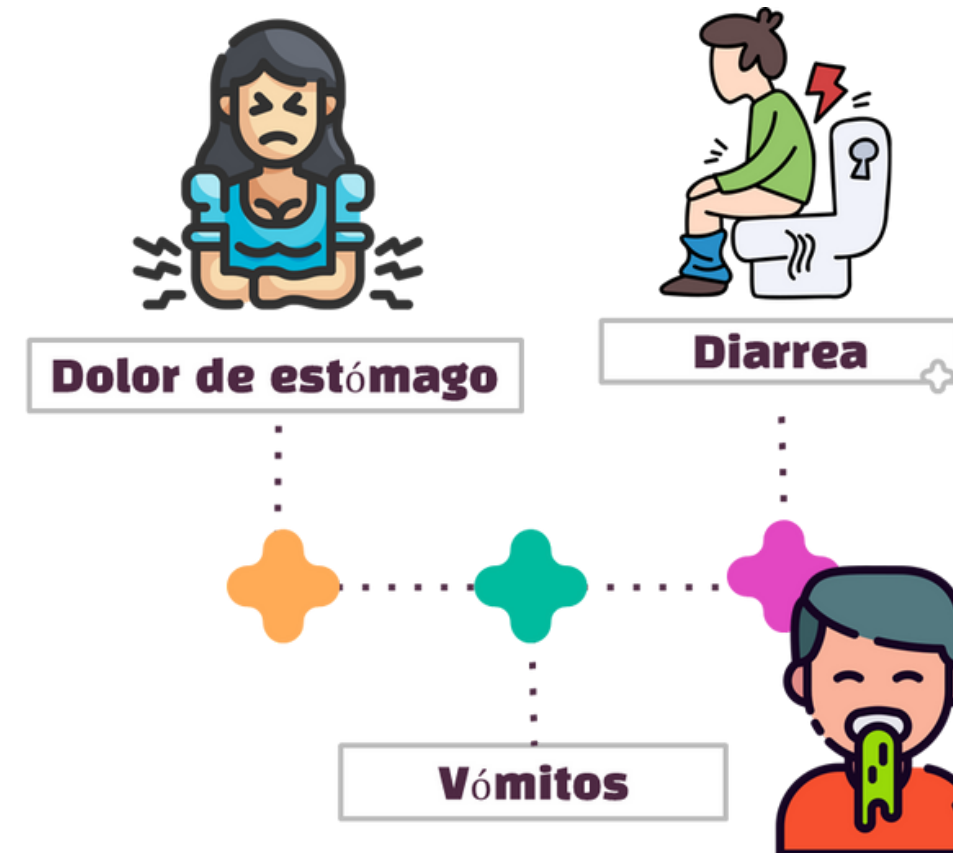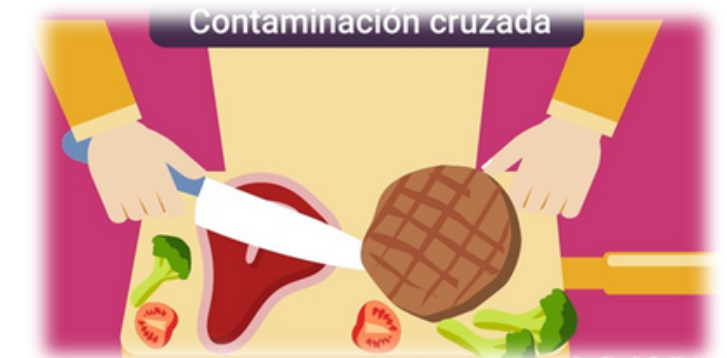

# Types of cross feeding

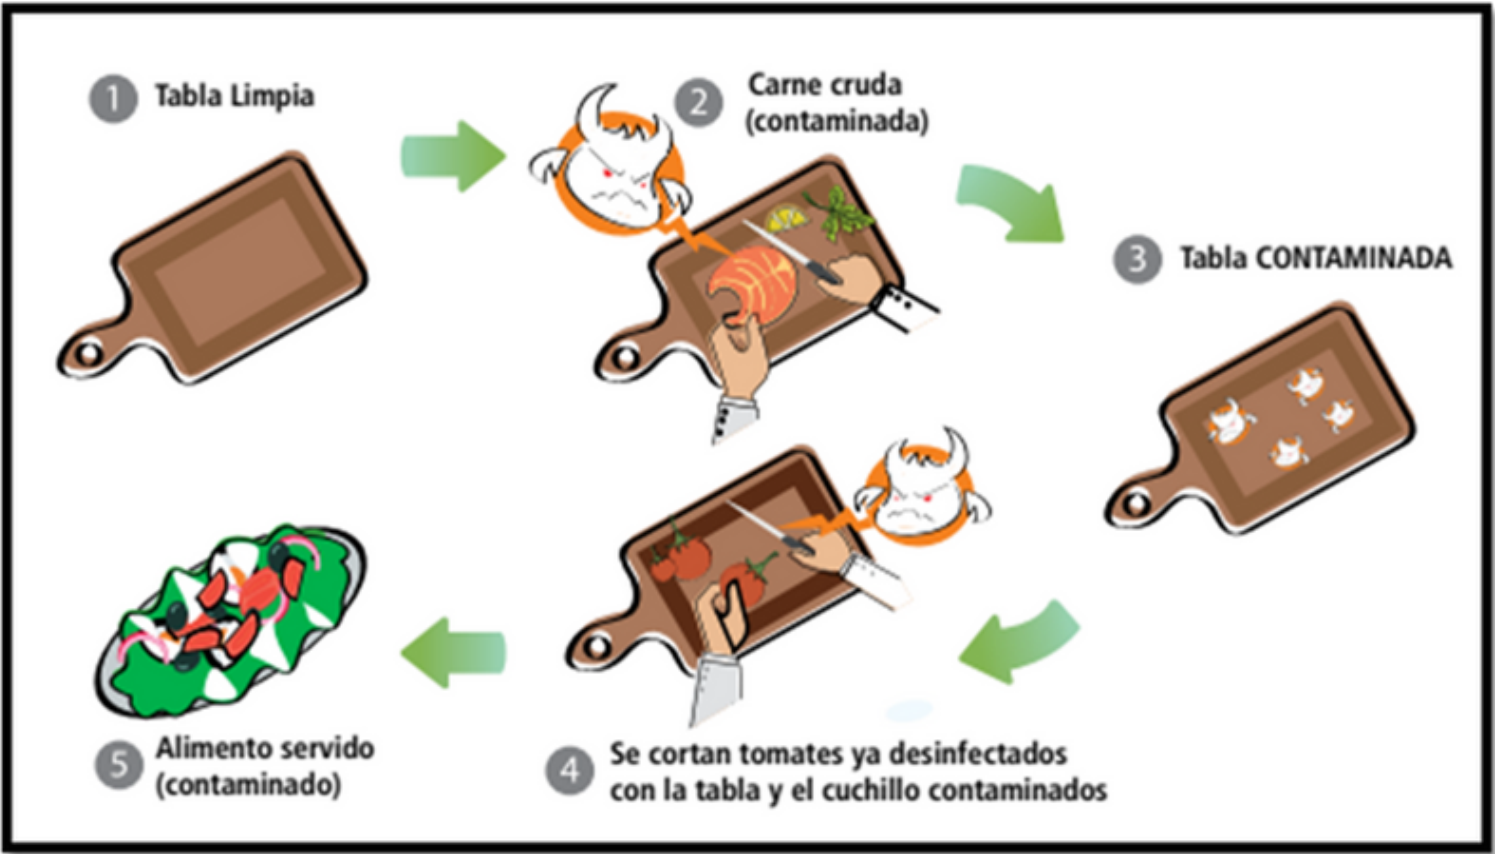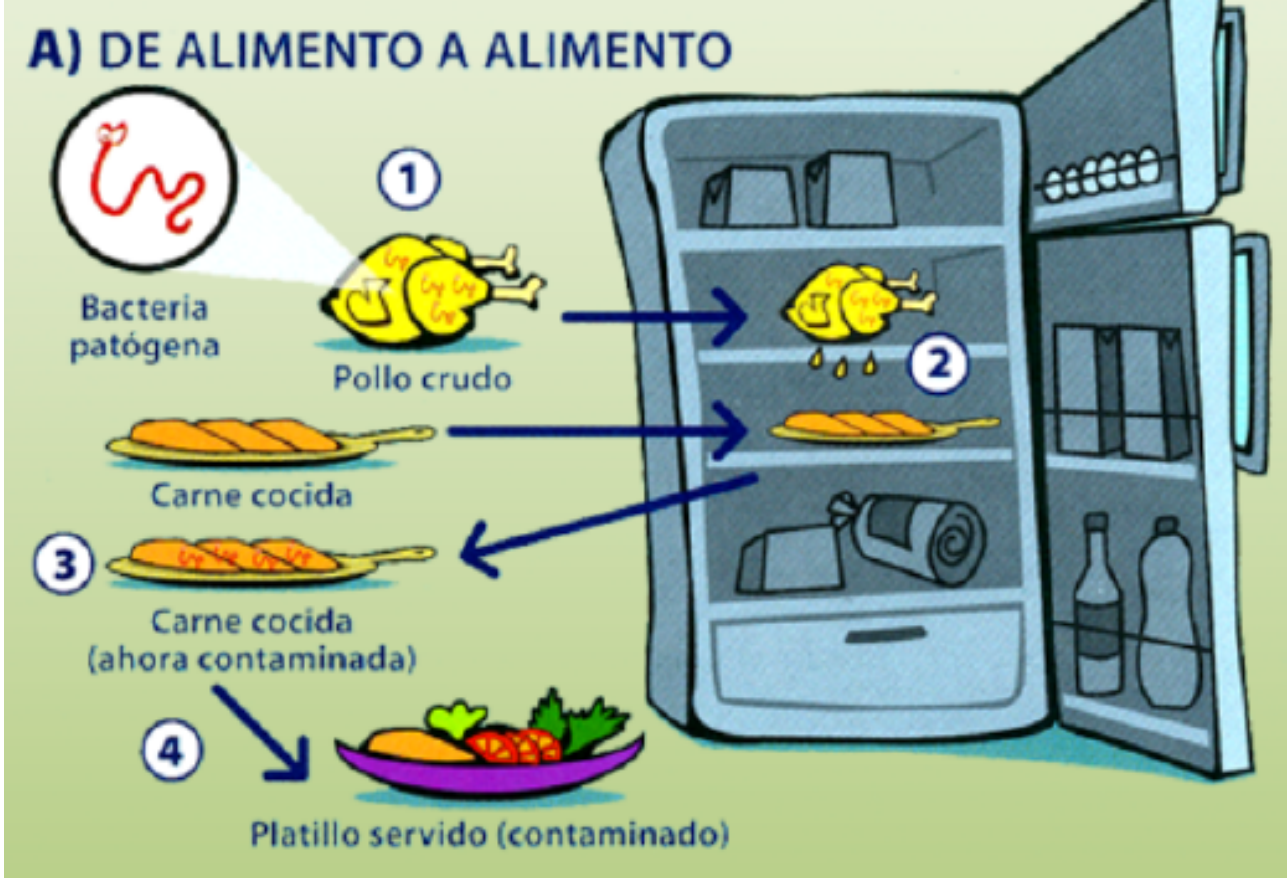

**INDIRECT**

Alimento

Superficie

Alimento

**DIRECT**

Alimento

Alimento

**What are ETAS?**

Foodborne diseases (ETA) are those diseases of an infectious or toxic nature.

Caused by:

- Biological agent
- Chemical agent
- Physical agent

# PREVENT MICROGANISM FROM INFECTING YOU BY COMPLYING WITH THE 5 KEYS TO FOOD HYGIENE:

## CLUE N°1

### KEEP CLEAN

- Wash your hands before preparing food and frequently during preparation.
- Wash your hands after using the bathroom.
- Wash surfaces and equipment used in food preparation.
- Protect food and kitchen areas from insects, pets and other animals.

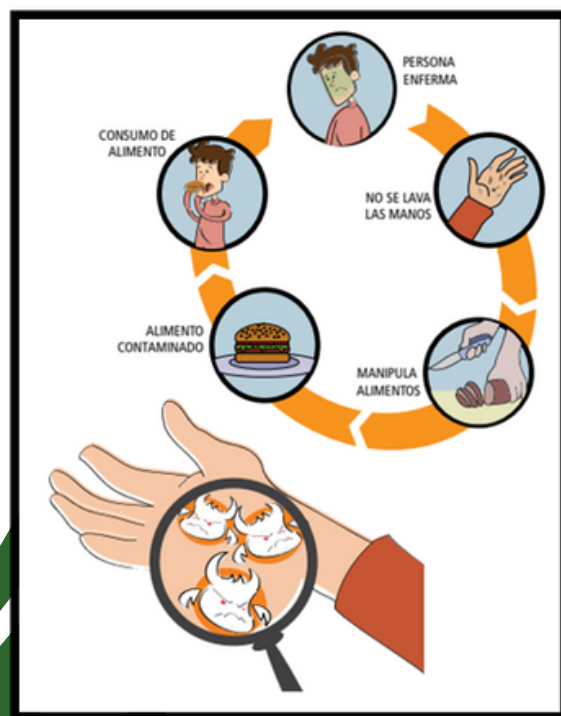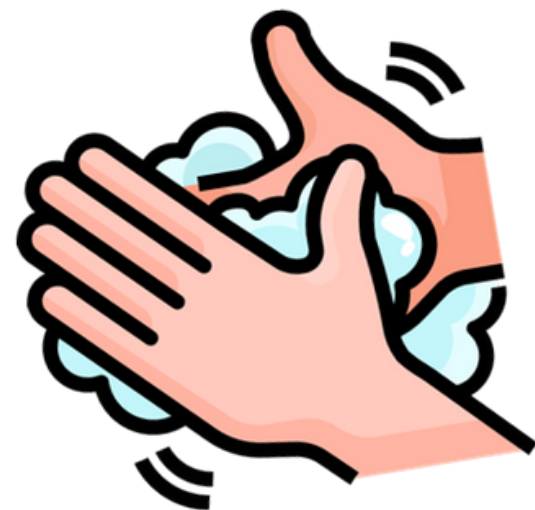

## CLUE N°2

### SEPARATE RAW FOODS FROM COOKED

Always separate raw foods from cooked foods  
and ready-to-eat foods.

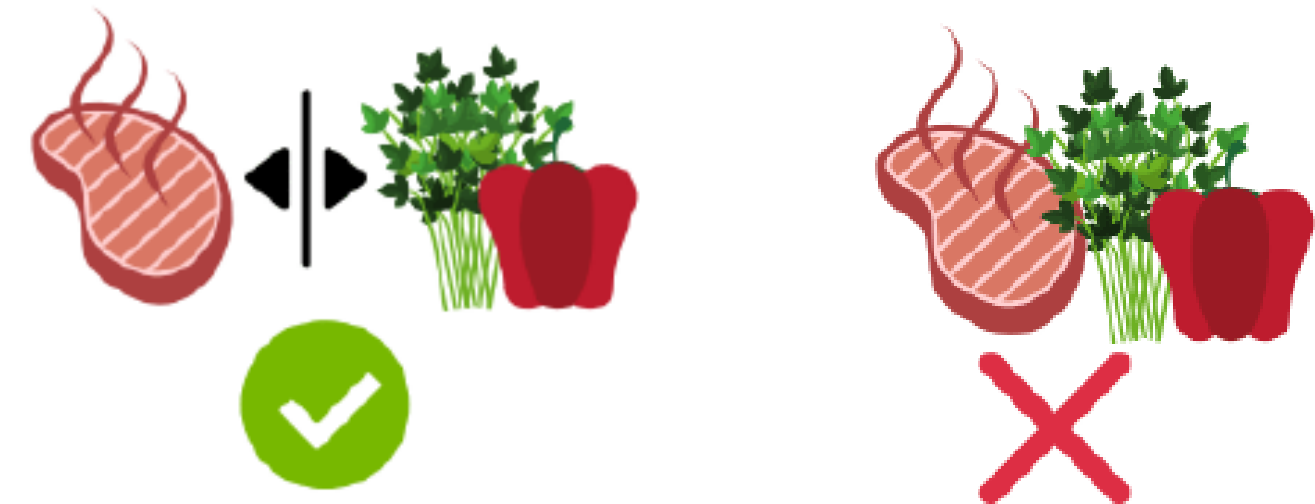

USE DIFFERENT EQUIPMENT AND UTENSILS.  
LIKE KNIVES AND CHOPING BOARDS FOR  
HANDLING MEAT, CHICKEN, FISH AND OTHER  
RAW FOODS.

### CLUE N°3

### COOK COMPLETELY

Cook foods thoroughly, especially meat, poultry, eggs, and fish.

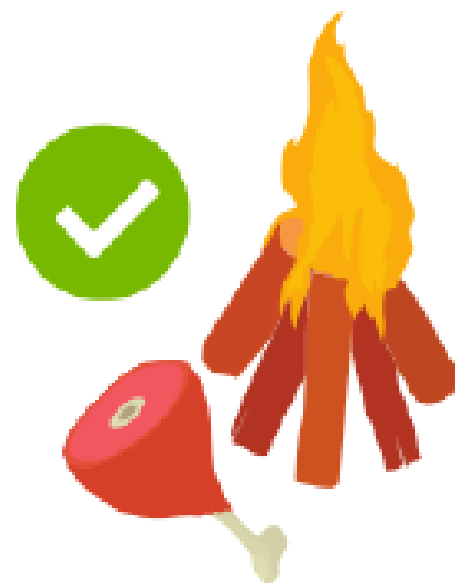

### CLUE N°5

### USE AGUA Y MATERIAS PRIMAS SEGURAS

Untreated water from rivers and canals is not safe, therefore it is necessary:

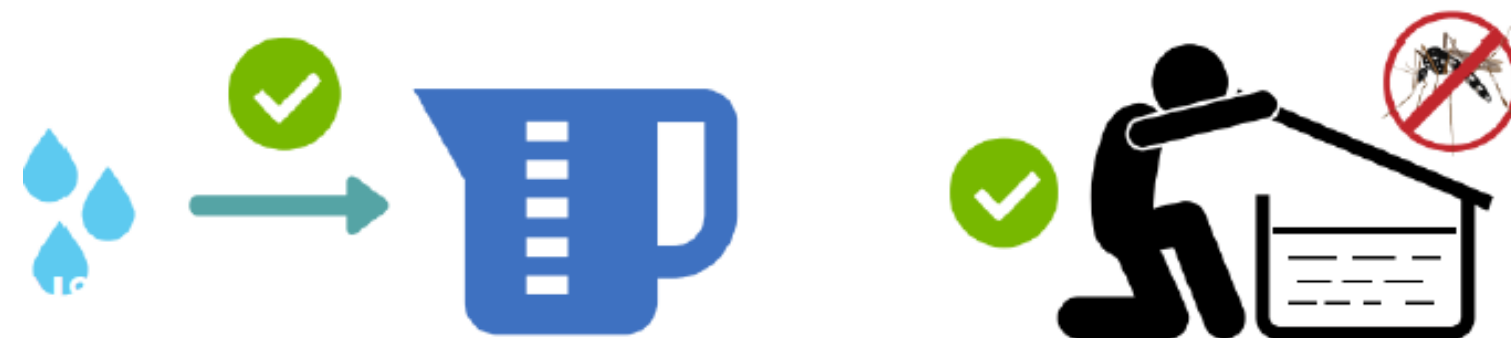

### CLUE N°4

### KEEP FOOD AT SAFE TEMPERATURES

- Protect food and kitchen areas from insects, pets and other animals.
- Prepare foods in small quantities to reduce leftovers.

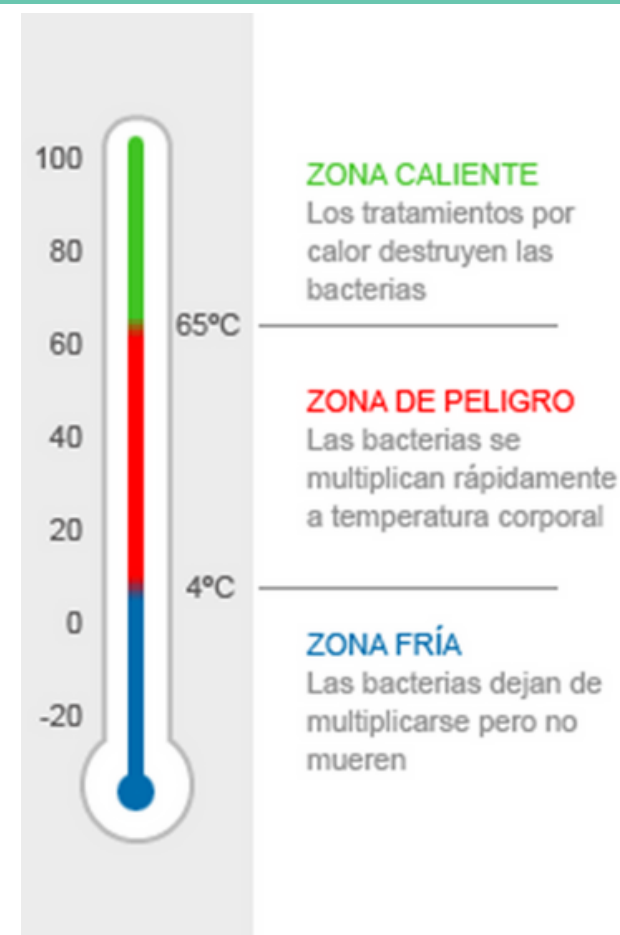

- Heat the water until it boils. Then add 3 to 5 drops of chlorine to 1 liter of water or physically eliminate the pathogens with an appropriate filter.
- Covering tanks and other receptacles or with mesh prevents the reproduction of dengue vector mosquitoes.

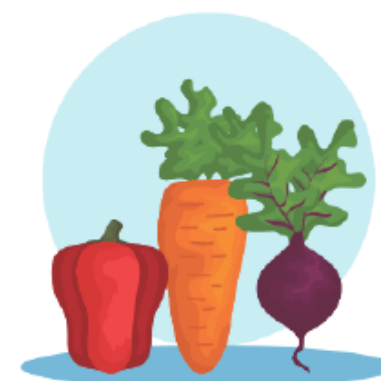

**WASH FRUITS AND VEGETABLES, ESPECIALLY IF THEY ARE EATEN RAW.**
