# Supplementary material
Source: publisher site journal article supplement (https://www.dovepress.com/article/440195)
Supplement: Supplementary file 4 [file 440195-revised-supplementary-material-S2-Spanish.pdf › 440195-revised-supplementary-material-S2-Spanish.pdf]



***ROTAFOLIO***

***de Nutrición***



***SALUD TOTAL -***

***SINCHICUY***

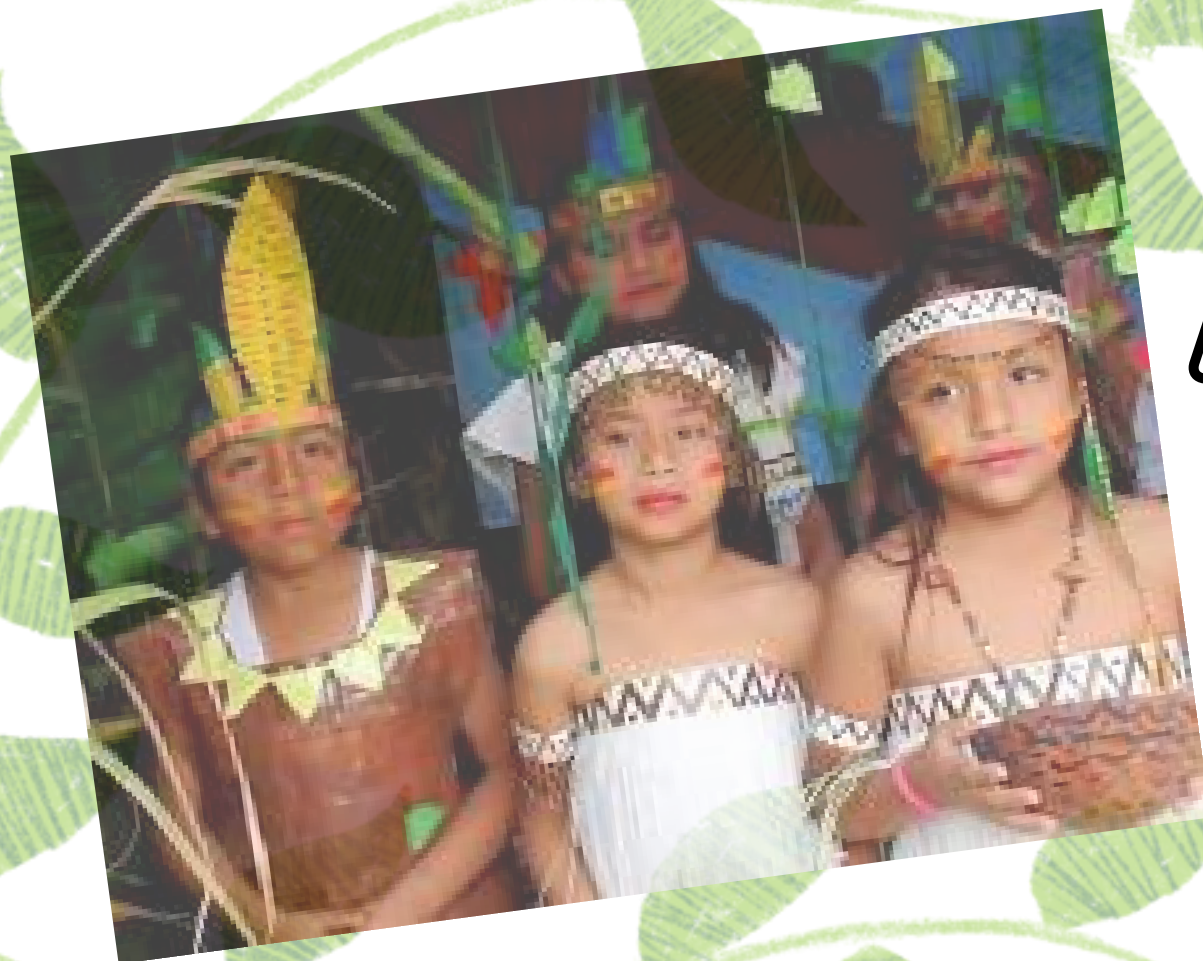

# **Elaboración:**

- **Cesia Isabel Toledo Garrido**
- **Yessica Cusquisibán Alcantara**

**2022**

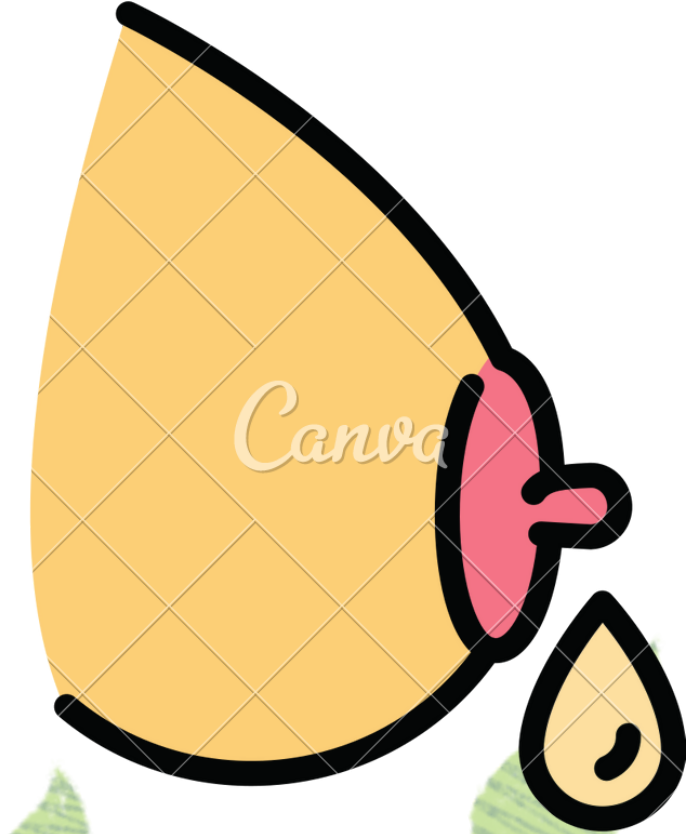

# Lactancia materna

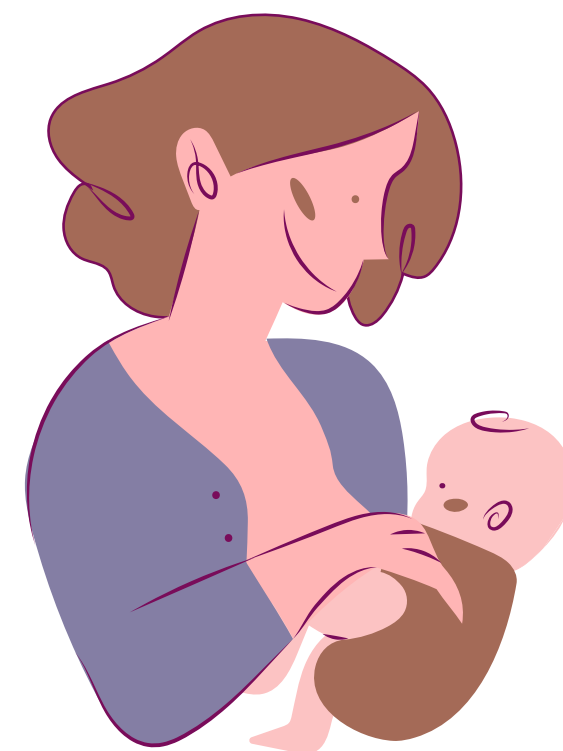

## ¿QUÉ ES LA LACTANCIA MATERNA?

Es un acto natural y la forma ideal de alimentar y aportar los nutrientes que necesitan los niños desde que nacen, para asegurar un crecimiento y desarrollo saludable.

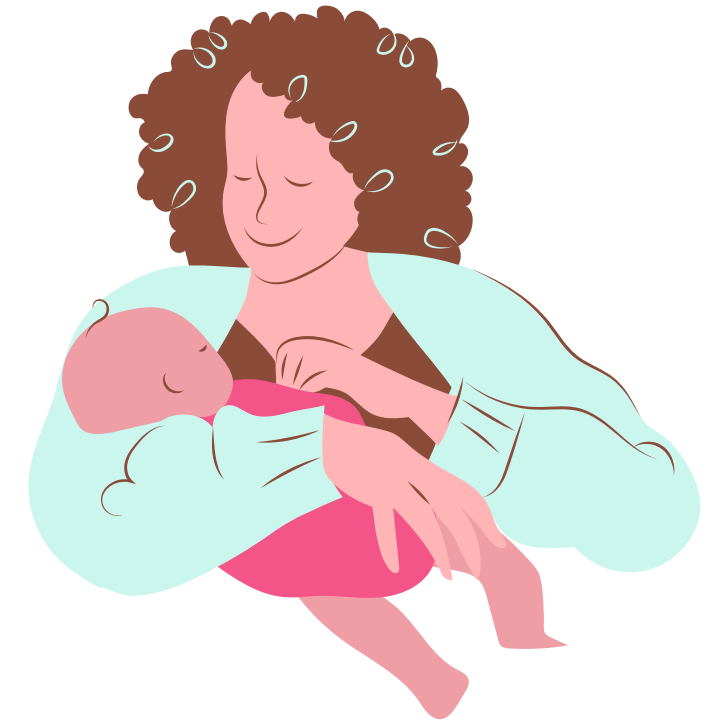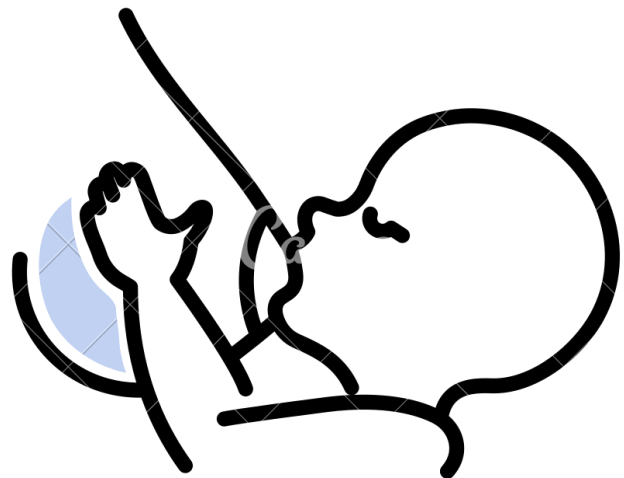

Es el mejor alimento que puedes ofrecer a tu hijo. Debes dársela inmediatamente después del parto y de manera exclusiva los 6 primeros meses de vida.

## ¿QUÉ ES LA LECHE MATERNA?

**RECUERDA  
QUE:**

La primera leche materna se llama calostro, el cual previene de muchas enfermedades a tu hijo.

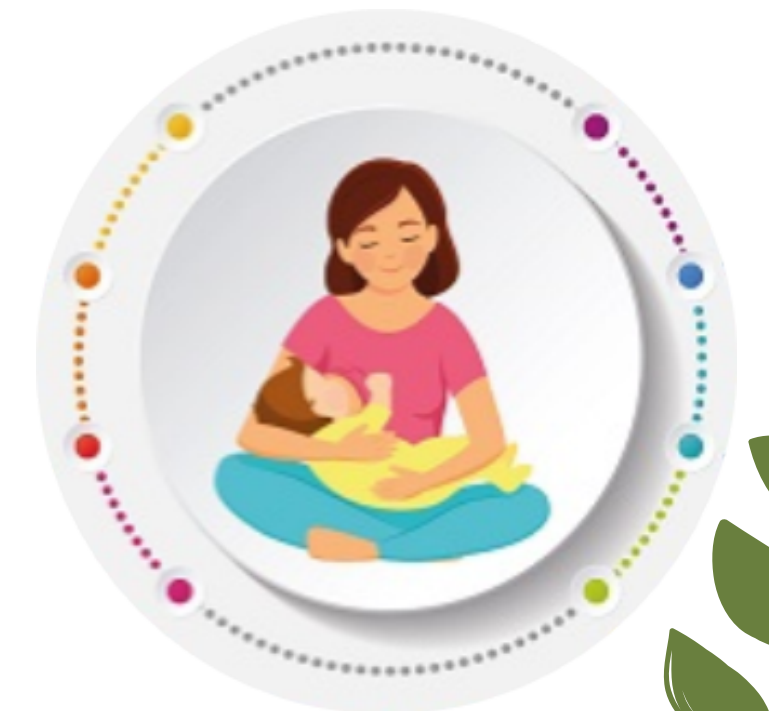

# BENEFICIOS DE LA LACTANCIA MATERNA

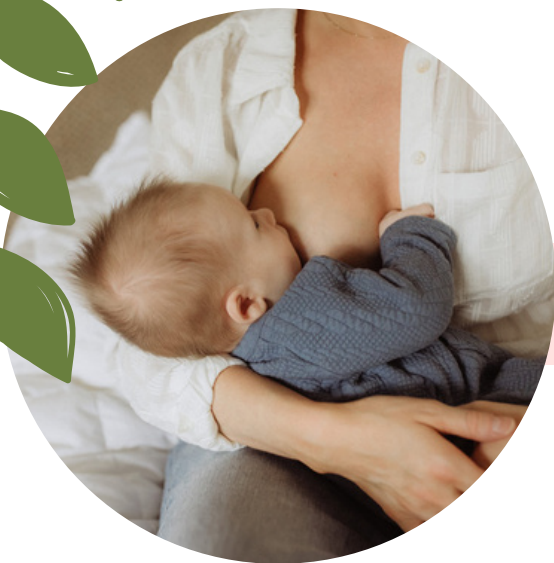

Es de fácil digestión y gratuita.

Aporta los nutrientes y componentes bioactivos necesarios que aseguren el crecimiento y desarrollo óptimo del niño (a).

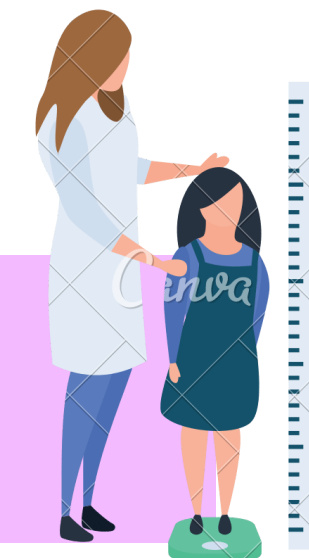

Aporta a la formación de tejidos y membranas celulares.

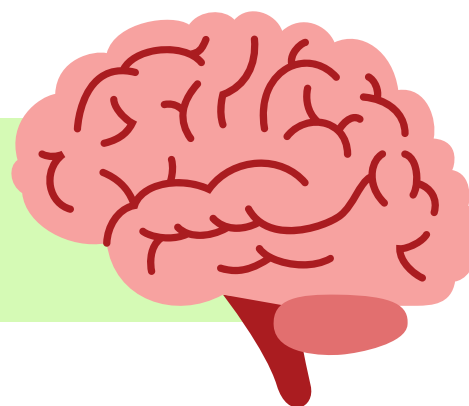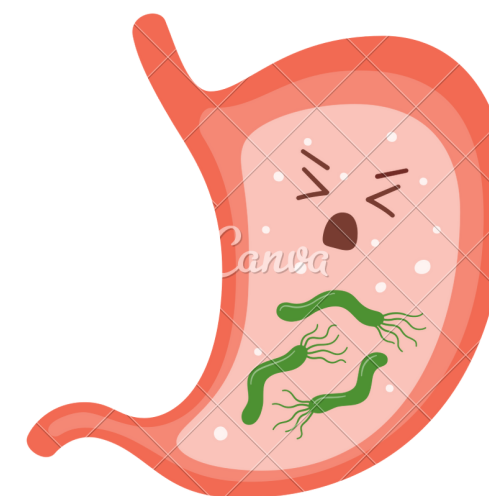

Protege al bebé contra las infecciones.

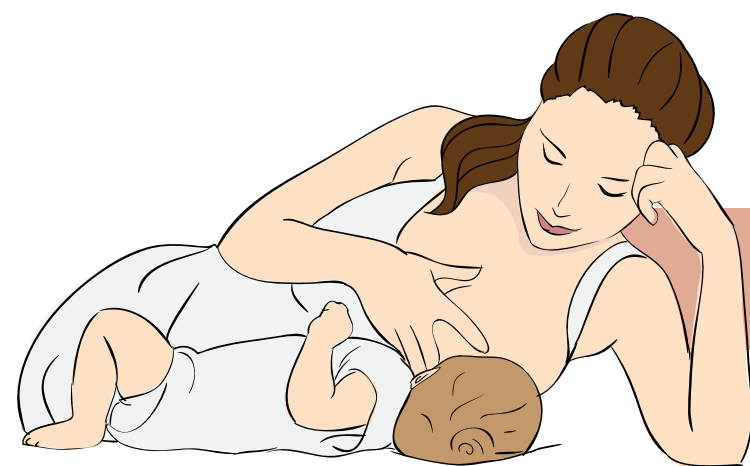

Protege la salud de la madre.

Disminuye el riesgo de cáncer de mama en las mujeres y previene alergias en los niños (as).

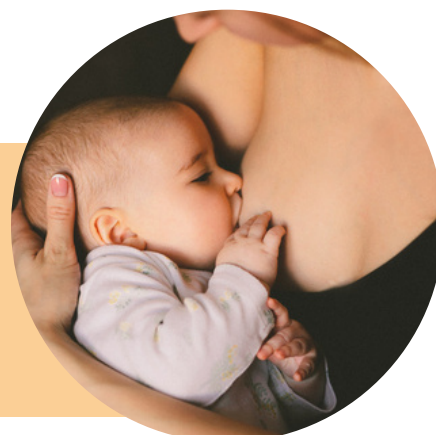

Favorece el vínculo afectivo y desarrollo emocional.

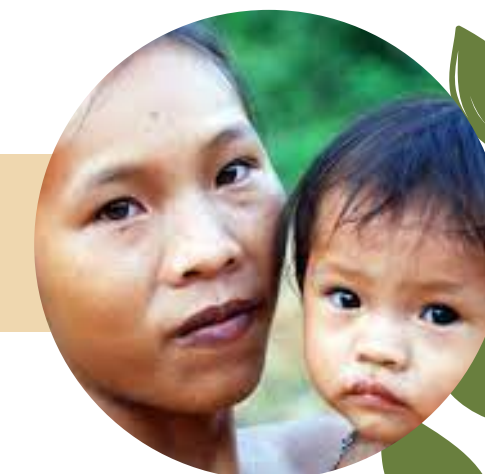

## PROPIEDADES NUTRICIONALES DE LA LACTANCIA MATERNA

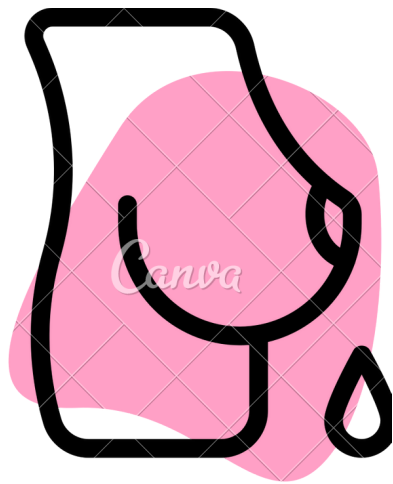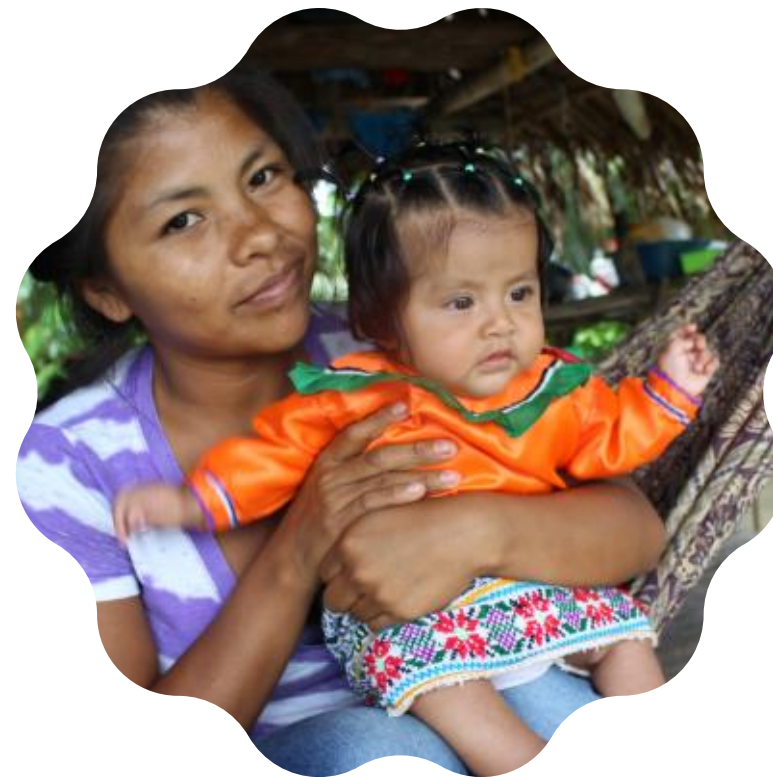

La producción de la leche será adecuada siempre que el niño succione con frecuencia.

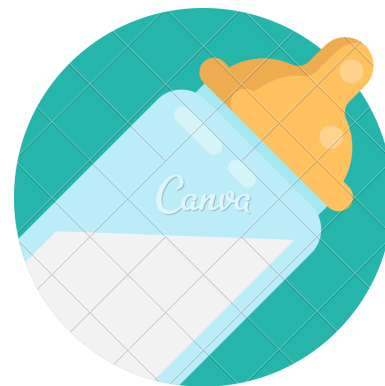

### Propiedades

Agua

Aporta la cantidad que tu niño necesita

Proteínas

De fácil digestión, contribuye a la formación, crecimiento y desarrollo del bebé.

Grasas

Gran fuente de ácidos grasos esenciales (DHA, EPA, ARA) para el desarrollo del sistema nervioso central y agudeza visual de tu niño.

**Aporta la energía necesaria para tu bebé**

Vitaminas y minerales

Contiene calcio, fósforo, magnesio, cobre, zinc y vitaminas como A, D, E, K, complejo B y vitamina C.

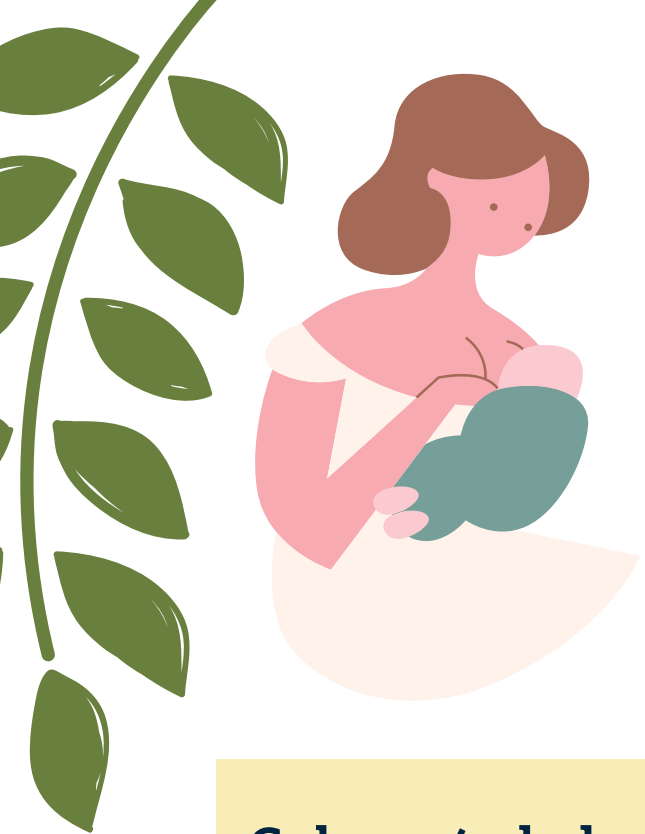

## TÉCNICA DEL AMAMANTAMIENTO

**Sigue estos 4 sencillos pasos y  
alimenta a tu bebé con amor**

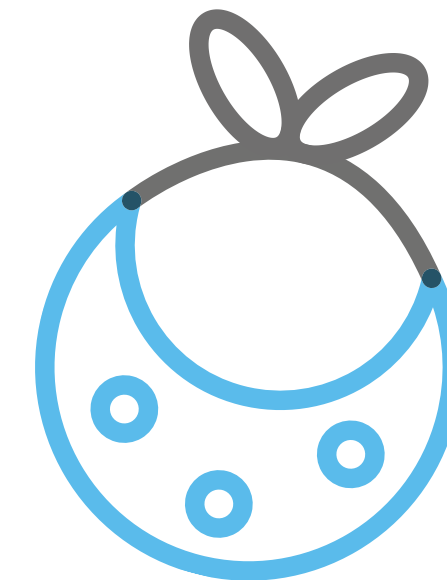

Coloca 4 dedos debajo de la mama y el pulgar arriba, detrás de la areola. Con el pezón toca el labio inferior del bebé, hasta que abra bien la boca.

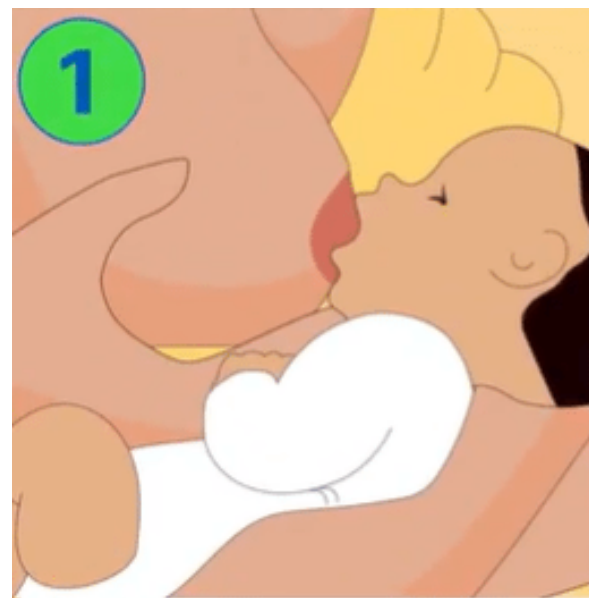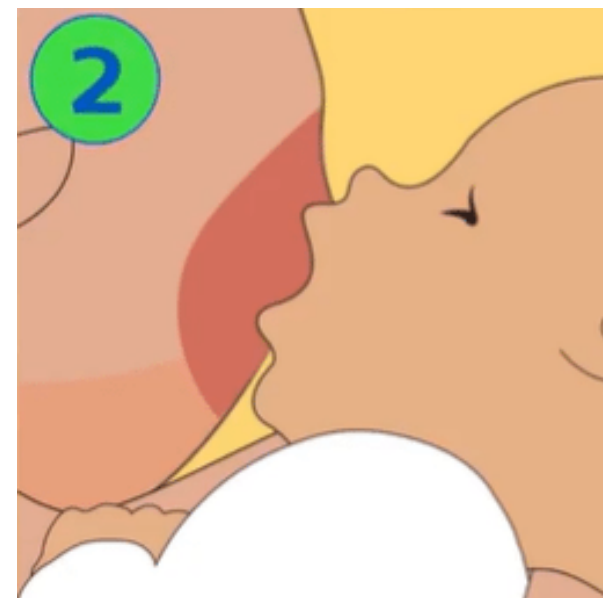

Acerca la cabeza del bebé hacia tu pecho, para que la boca cubra la areola. La nariz y el mentón debe estar en contacto con el pecho.

El pezón debe quedar dentro de la boca, para que el niño o niña succione

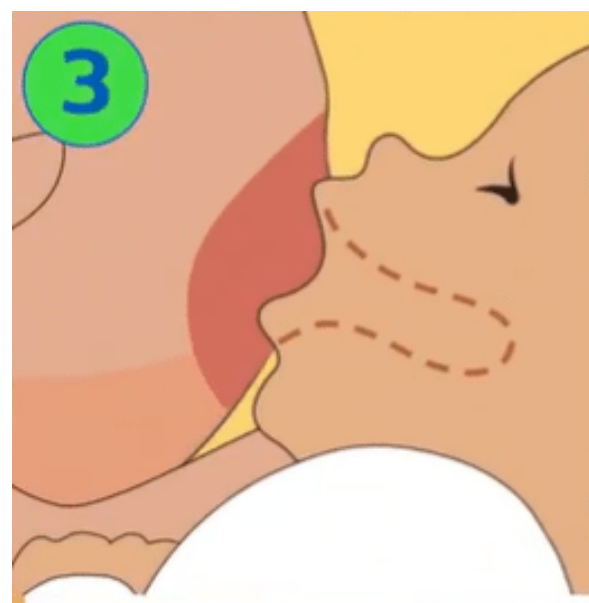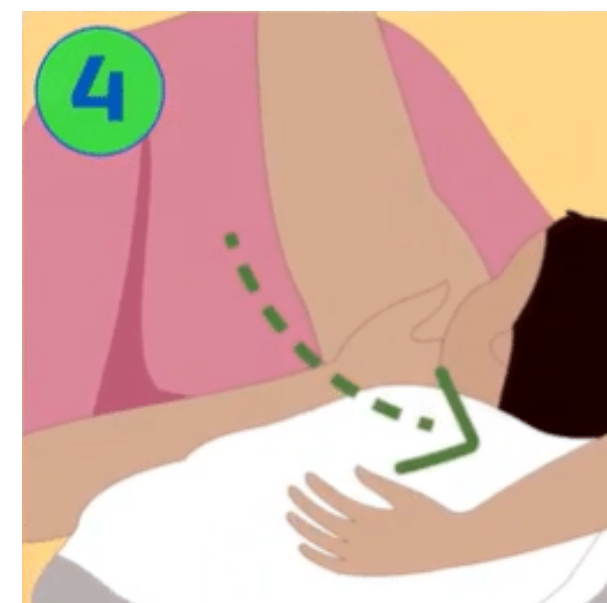

No retires a tu bebé de tu seno hasta que haya terminado de lactar.

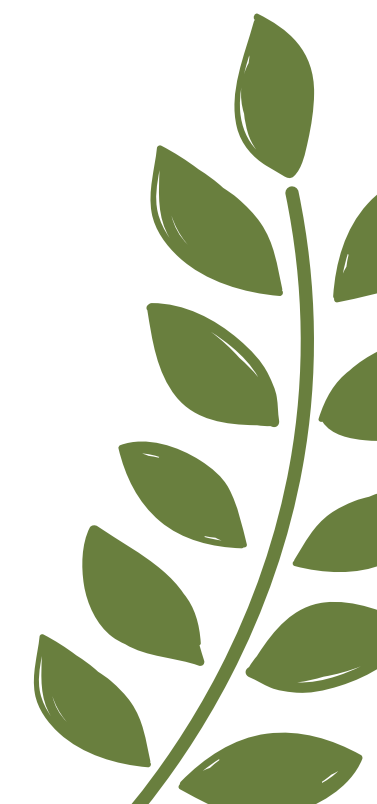

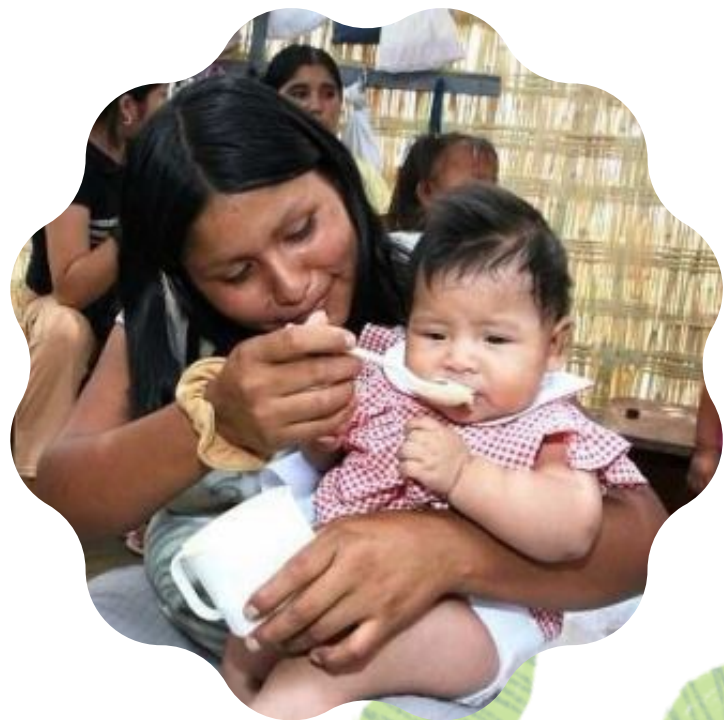

# Alimentación complementaria

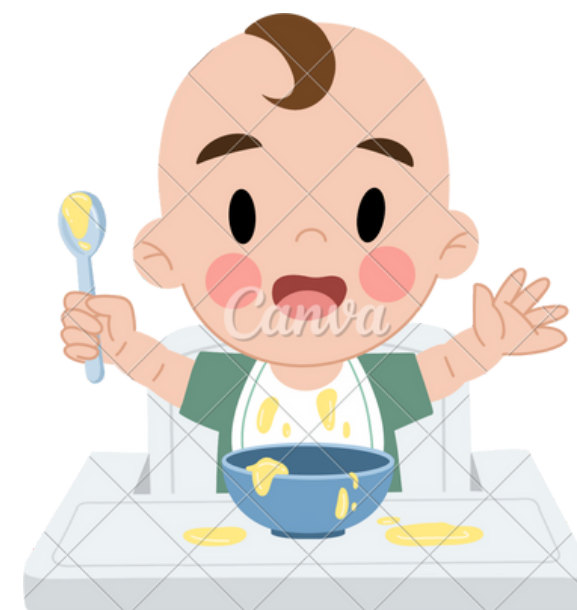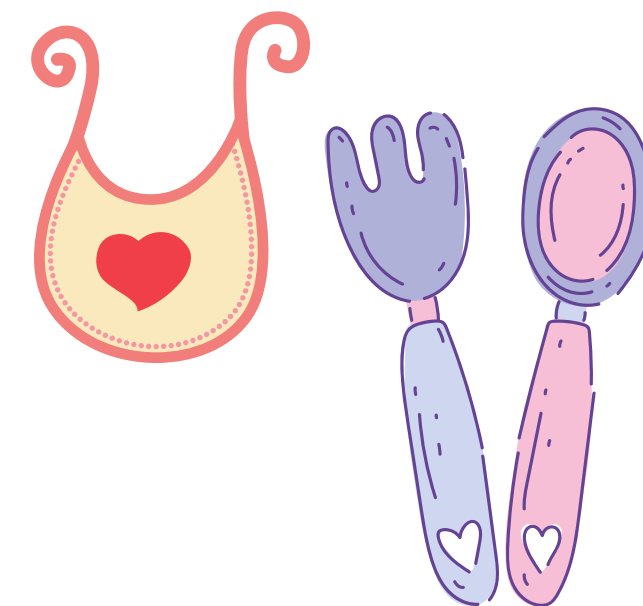

# ¿QUÉ ES LA ALIMENTACIÓN COMPLEMENTARIA?

Es el proceso que comienza cuando la leche materna por sí sola ya no es suficiente para satisfacer las necesidades nutricionales del lactante, y por tanto se necesitan otros alimentos y líquidos, además de la leche materna.

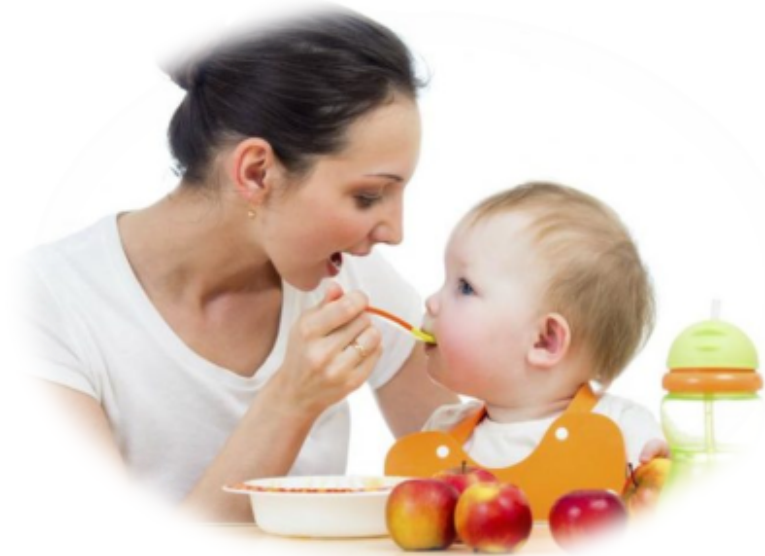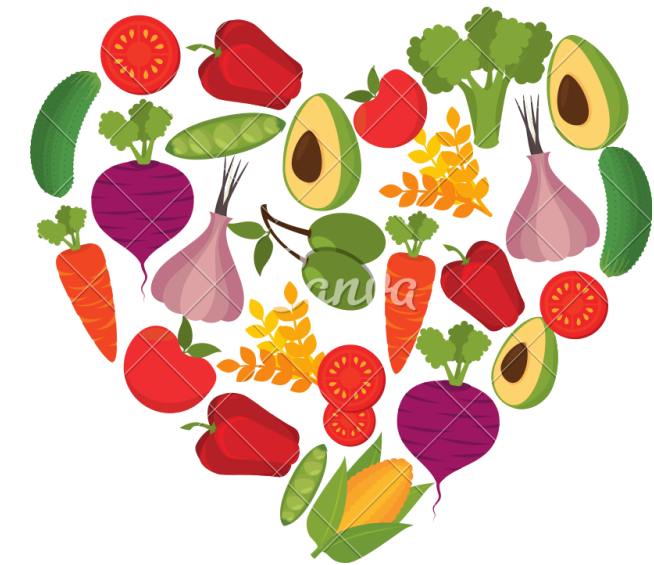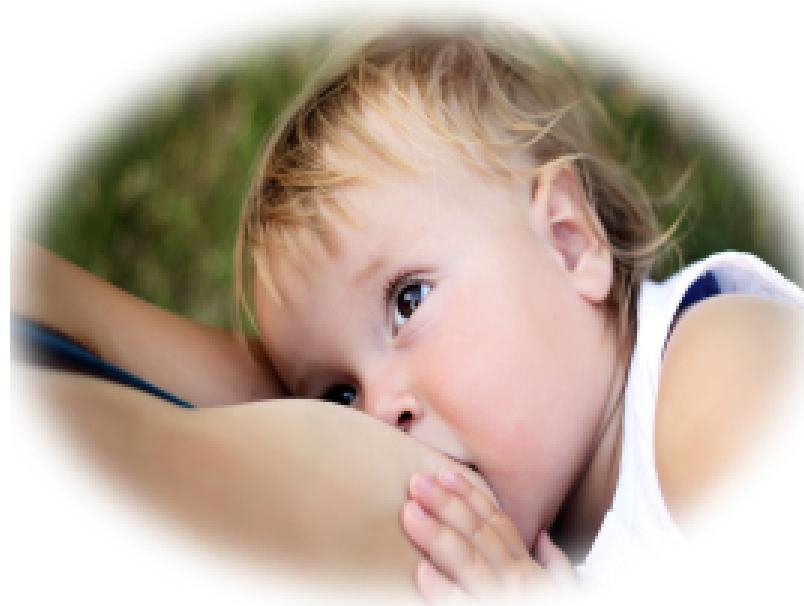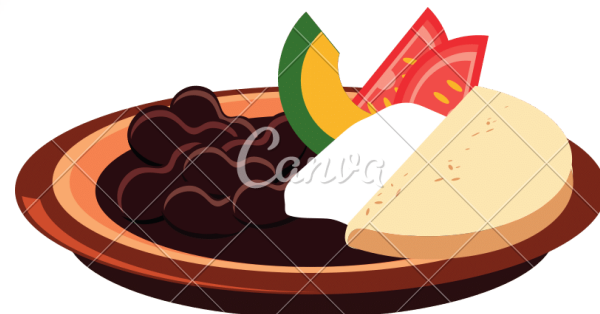

La transición de la lactancia exclusivamente materna a la alimentación complementaria abarca generalmente el periodo que va de los 6 a los 18 a 24 meses de edad, y es una fase de gran vulnerabilidad, cuando para muchos niños empieza la malnutrición, y de las que más contribuye a la alta prevalencia de la malnutrición en los menores de 5 años de todo el mundo.

## ¿POR QUÉ INICIAR A LOS 6 MESES?

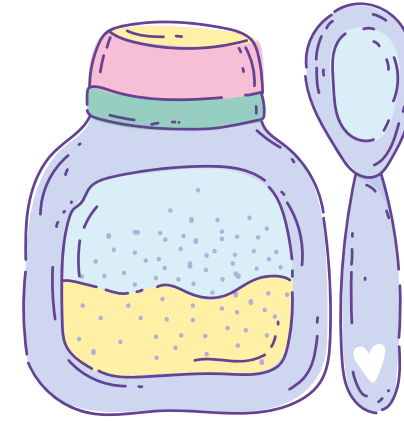

Aspectos que facilitan la alimentación a partir de los 6 meses:

- Es la edad en que su sistema digestivo está suficientemente maduro para digerir una variedad de alimentos (Su intestino empieza a actuar como “barrera” para evitar posibles infecciones. Existe la cantidad de enzimas suficientes que facilitan la digestión y absorción).
- Pueden hacer movimientos de masticación de arriba hacia abajo.
- Pueden controlar mejor su lengua.
- Gustan de poner objetos en su boca.
- Están interesados en nuevos sabores.

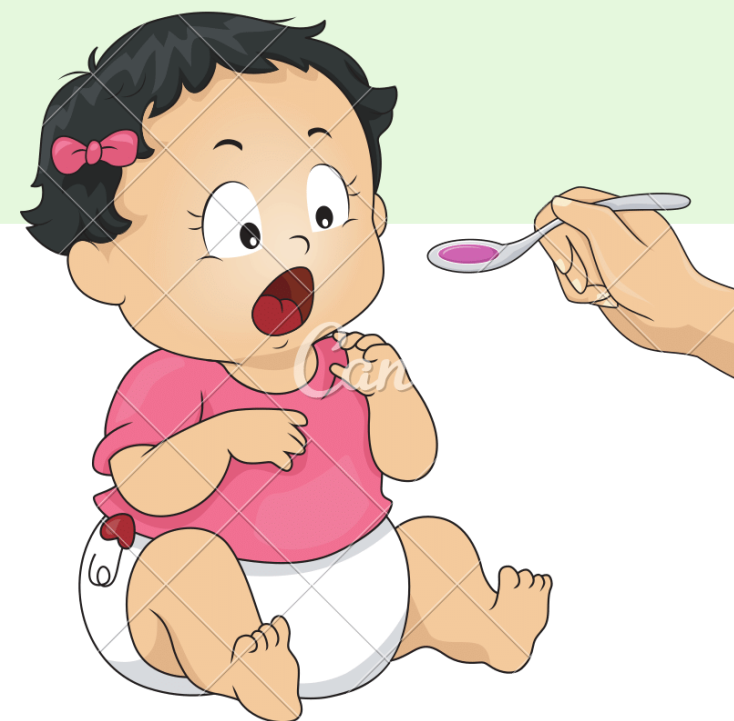

## **RIESGOS DE LA INTRODUCCIÓN TEMPRANA**

A corto plazo:

- ❖ Posibilidad de atragantamiento.
- ❖ Aumento de gastroenteritis agudas e infecciones del tracto respiratorio superior.
- ❖ Interferencia con la biodisponibilidad de hierro y zinc de la leche materna.
- ❖ Sustitución de tomas de leche por otros alimentos menos nutritivos.

A largo plazo:

- ❖ Mayor riesgo de obesidad.
- ❖ Mayor riesgo de eccema atópico.
- ❖ Mayor riesgo de diabetes mellitus tipo 1.
- ❖ Mayor tasa de destete precoz, con los riesgos añadidos que esto conlleva.

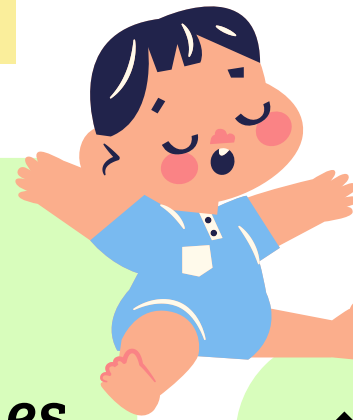

## **RIESGOS DE LA INTRODUCCIÓN TARDÍA**

- ❖ Carencias nutricionales, sobre todo de hierro y zinc.
- ❖ Aumento del riesgo de alergias e intolerancias alimentarias.
- ❖ Peor aceptación de nuevas texturas y sabores.
- ❖ Mayor posibilidad de alteración de las habilidades motoras orales.

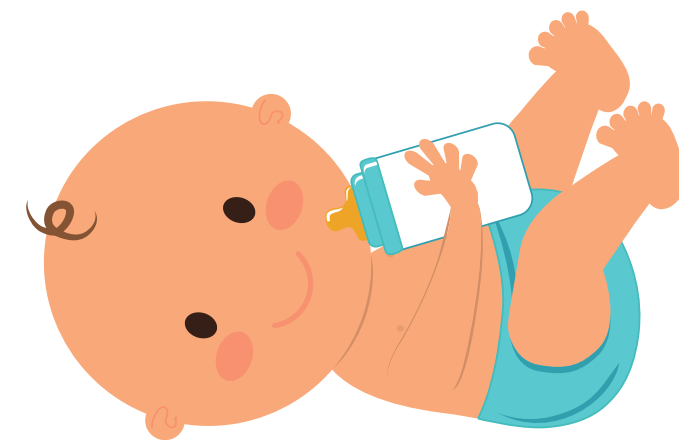

# ¿CÓMO DEBE SER LA ALIMENTACIÓN COMPLEMENTARIA?

| Edad        | Veces por día                                                                 | Consistencia                   | Cantidad                                                                                                   |              |
|-------------|-------------------------------------------------------------------------------|--------------------------------|------------------------------------------------------------------------------------------------------------|--------------|
| 6 meses     | 2 comiditas por día.<br>Media mañana, Medio día                               | Papillas, purés,<br>mazamorras | 2 a 3<br>cucharadas     | = 1/4 taza   |
| 7-8 meses   | 3 comiditas por día.<br>Media mañana, Medio día, Media tarde                  | Comida triturada               | 3 a 5<br>cucharadas    | = 1/2 taza   |
| 9-11 meses  | 4 comiditas por día.<br>Temprano, Media mañana, Medio día, Media tarde        | Comida picadita                | 5 a 7<br>cucharadas   | = 1 taza     |
| 12-24 meses | 5 comiditas por día.<br>Temprano, Media mañana, Medio día, Media tarde, Noche | De la olla familiar            | 7 a 10<br>cucharadas  | = 1 1/2 taza |

**6-8**  
**MESES**

**Alimentos  
de origen  
animal**

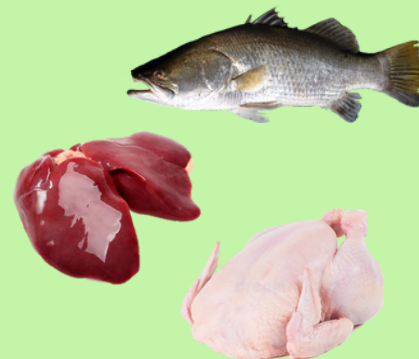

**Hígado,  
bazo,  
pescado,  
pollo.**

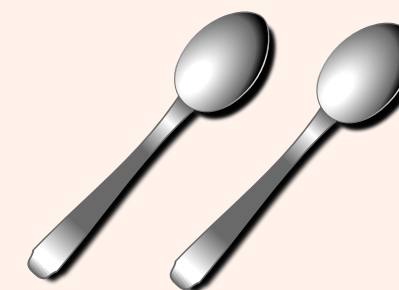

**Cereales y  
tubérculos**

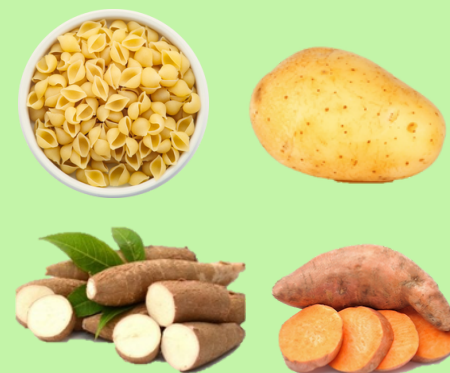

**Yuca, pituca,  
papa, fideos,  
sémola.**

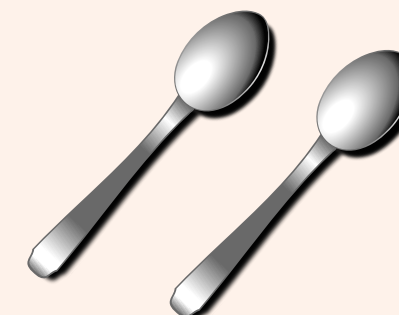

**Vegetales**

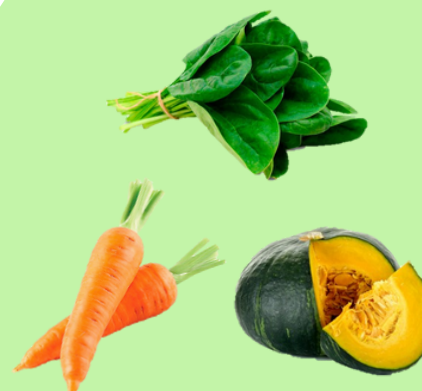

**Zapallo,  
zanahoria,  
espinaca,  
etc.**

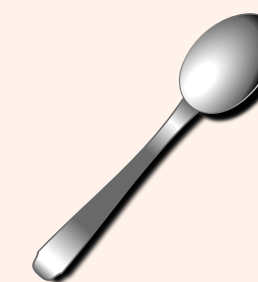

9-11  
MESES

Alimentos  
de origen  
animal

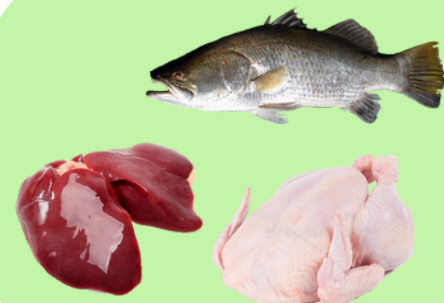

Hígado, bazo,  
bofe, pescado,  
pollo.

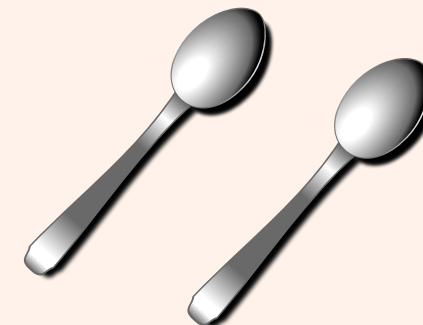

Grasas

Cereales y  
tubérculos

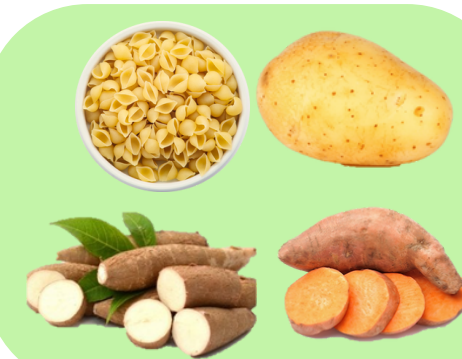

Yuca,  
camote,  
papa, fideo,  
sémola.

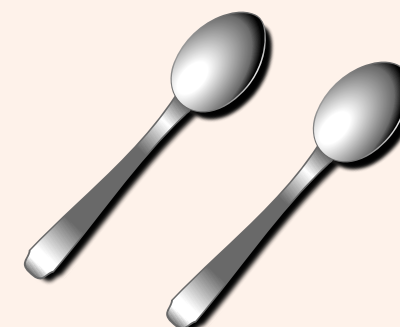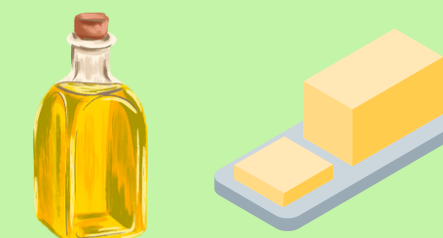

Menestras

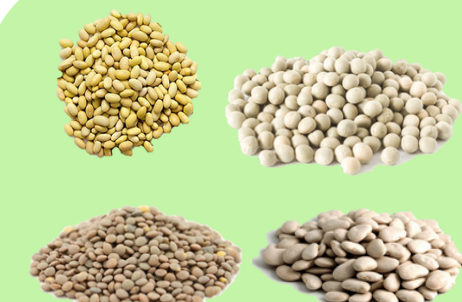

Frejoles,  
lentejas,  
pallares sin  
cáscara.

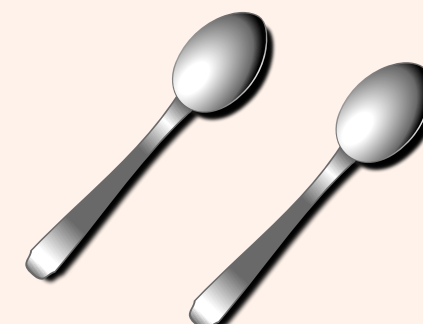

Aceite o  
mantequilla  
en la comida  
principal.

Vegetales

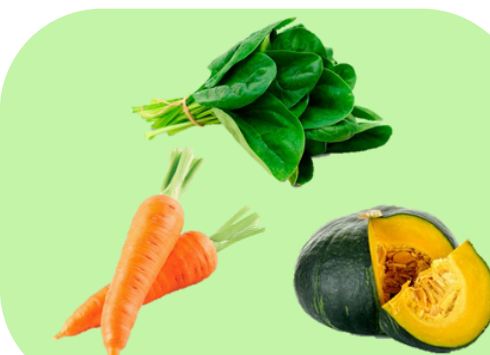

Zapallo,  
zanahoria,  
espinaca, etc.

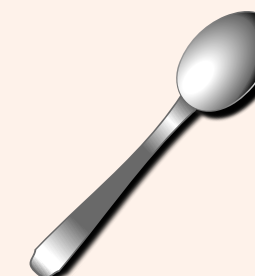

Frutas

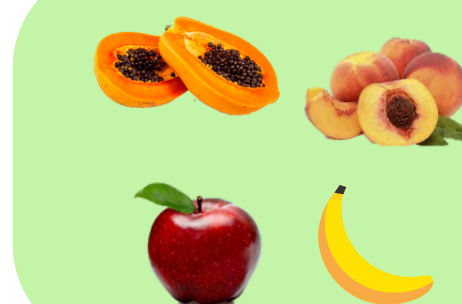

Plátano,  
papaya,  
durazno, etc.

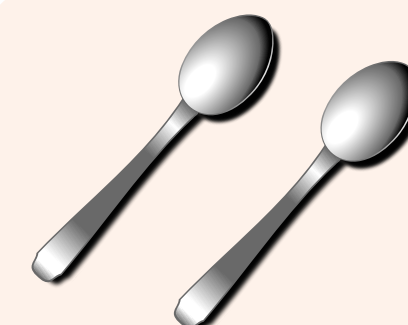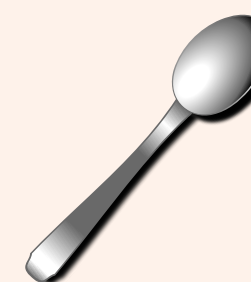

**12-24  
MESES**

**Alimentos  
de origen  
animal**

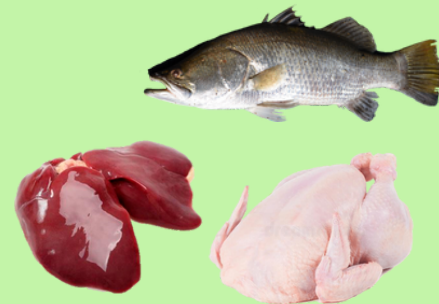

**Hígado, bazo,  
bofe, pescado,  
pollo, carne.**

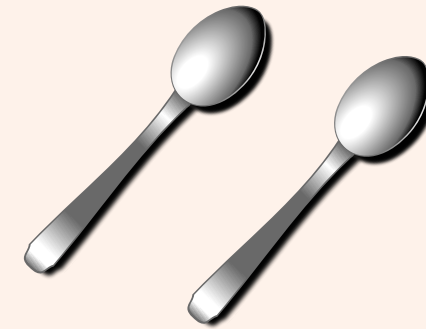

**Cereales y  
tubérculos**

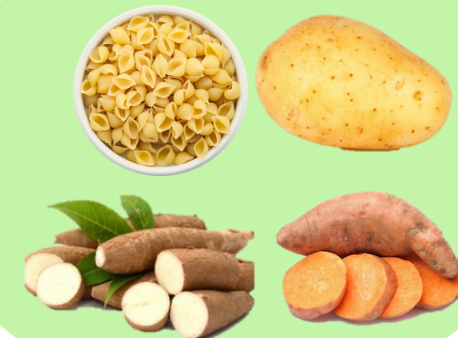

**Yuca, camote,  
papa, fideo,  
arroz,  
sémola.**

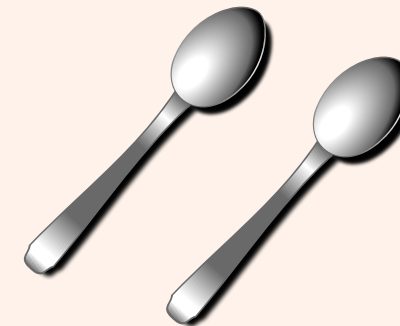

**Menestras**

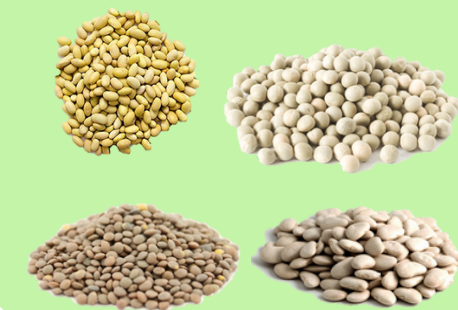

**Frejoles,  
lentejas,  
pallares sin  
cáscara.**

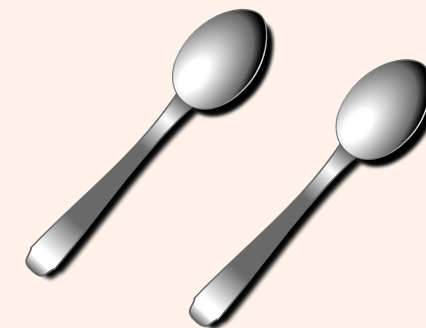

**Vegetales**

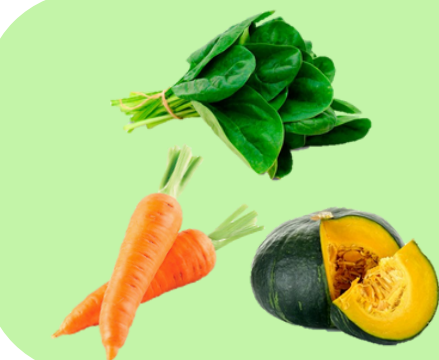

**Zapallo,  
zanahoria,  
espinaca, etc.**

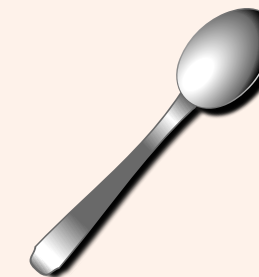

**Frutas**

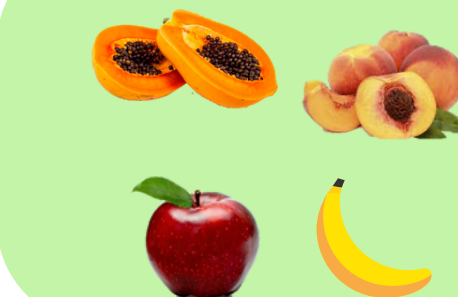

**Plátano,  
papaya,  
durazno, etc.**

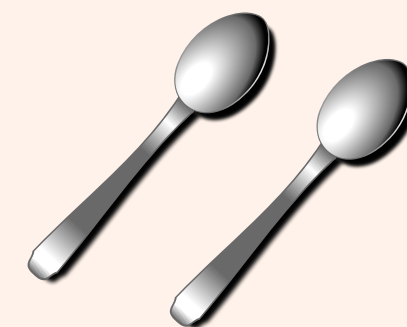

**Grasas**

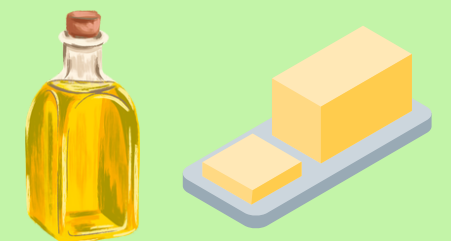

**Aceite o  
mantequilla  
en la comida  
principal.**

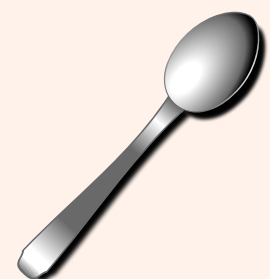

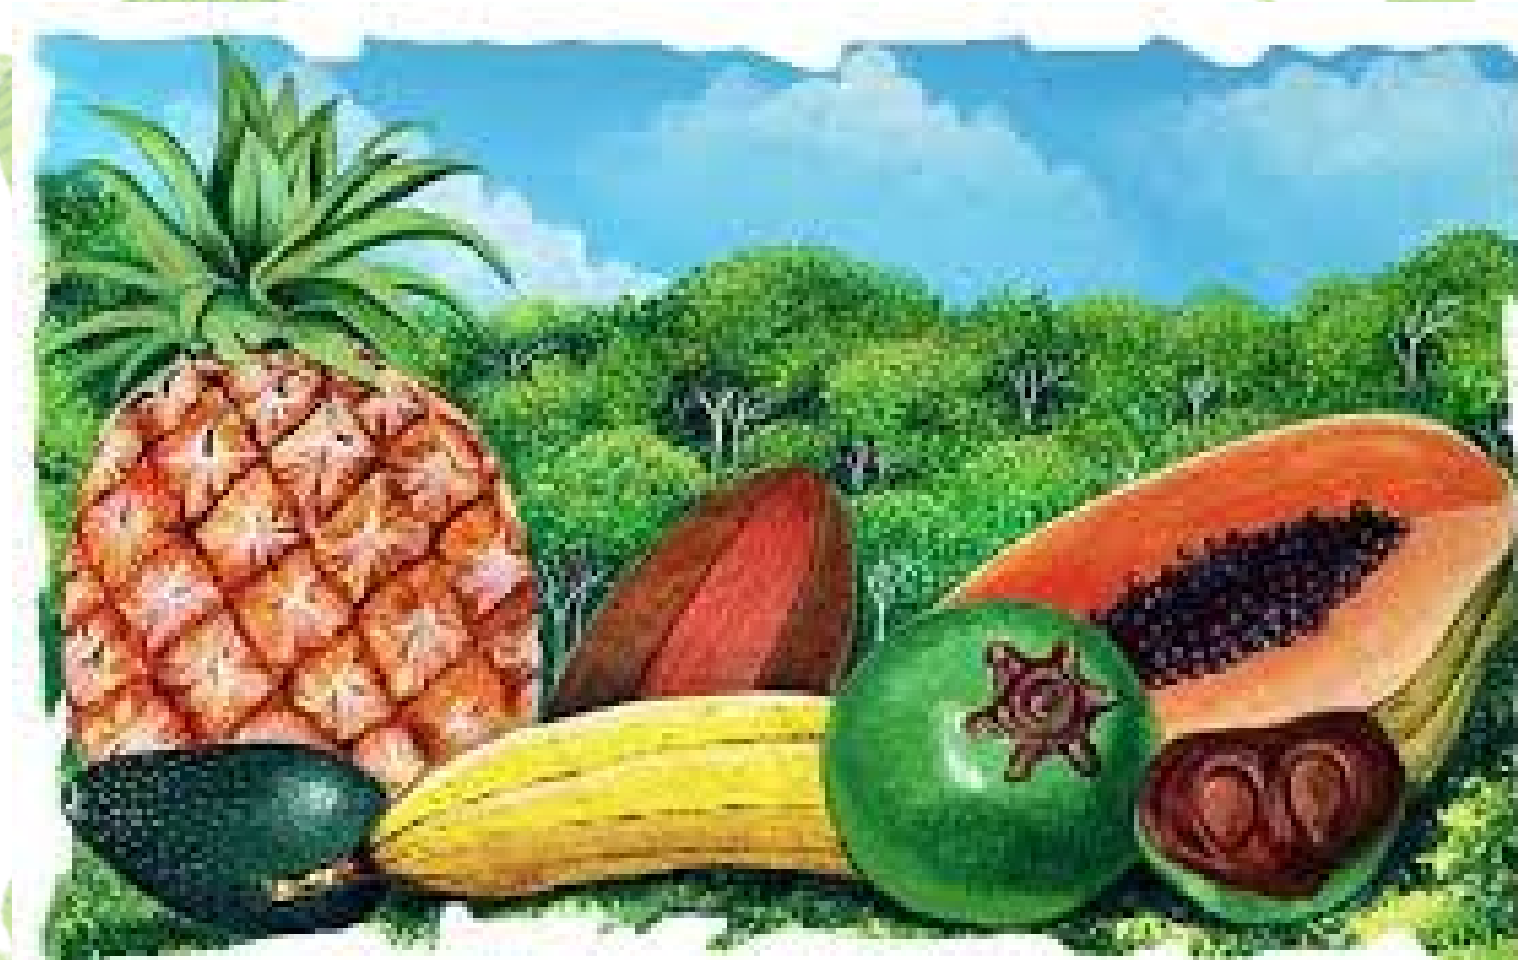

**ALIMENTACIÓN**

**SALUDABLE**

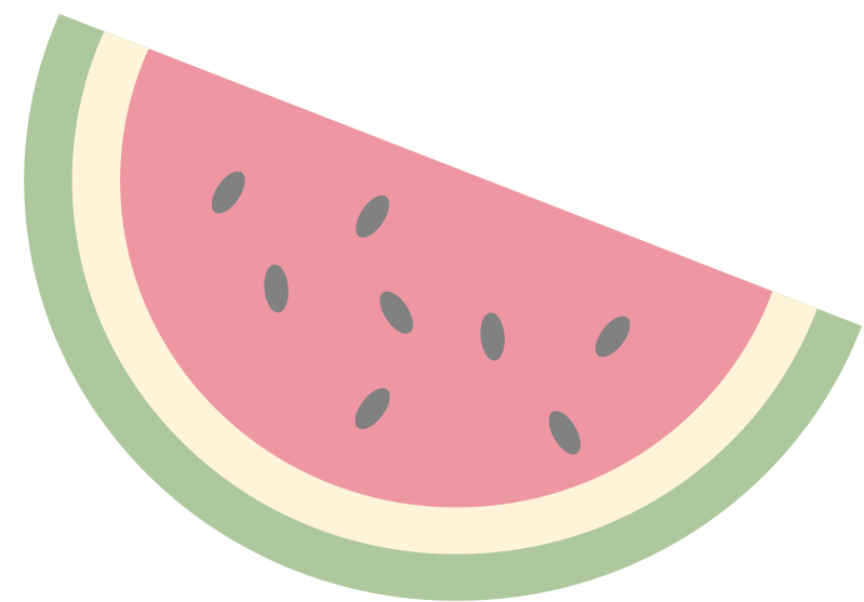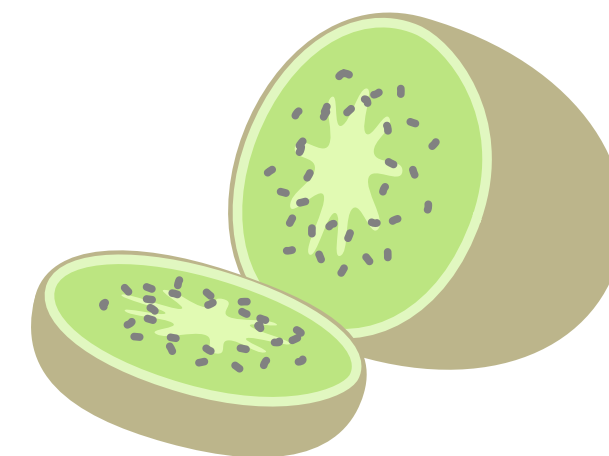

## ¿QUÉ ES UNA ALIMENTACIÓN SALUDABLE?

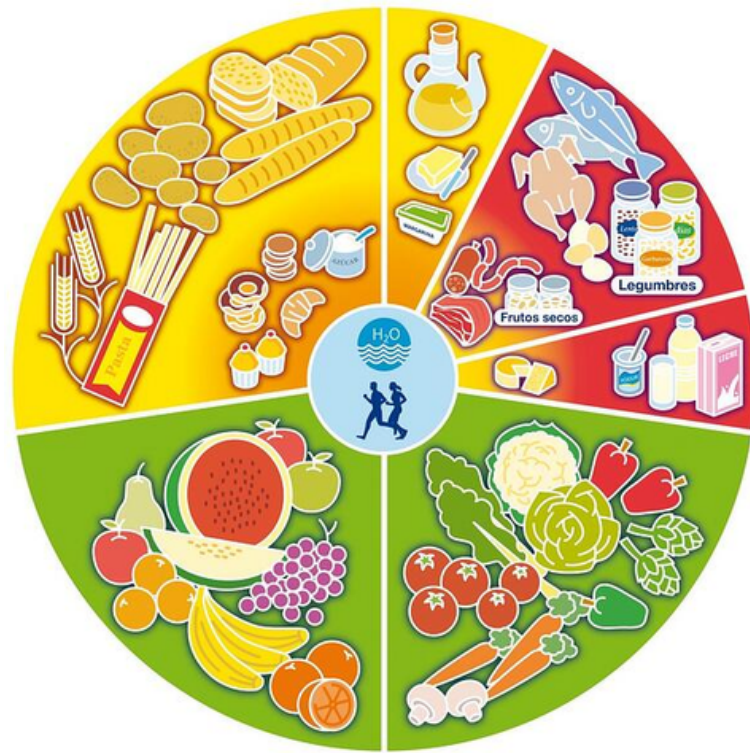

Es aquella que aporta a cada individuo todos los alimentos necesarios para cubrir sus necesidades nutricionales

La mejor manera de alcanzar un estado nutricional adecuado es incorporar una amplia variedad de alimentos principalmente frescos, de temporada y de proximidad, a nuestra alimentación diaria y semanal.

CONSUMO OCASIONAL

CONSUMO DIARIO

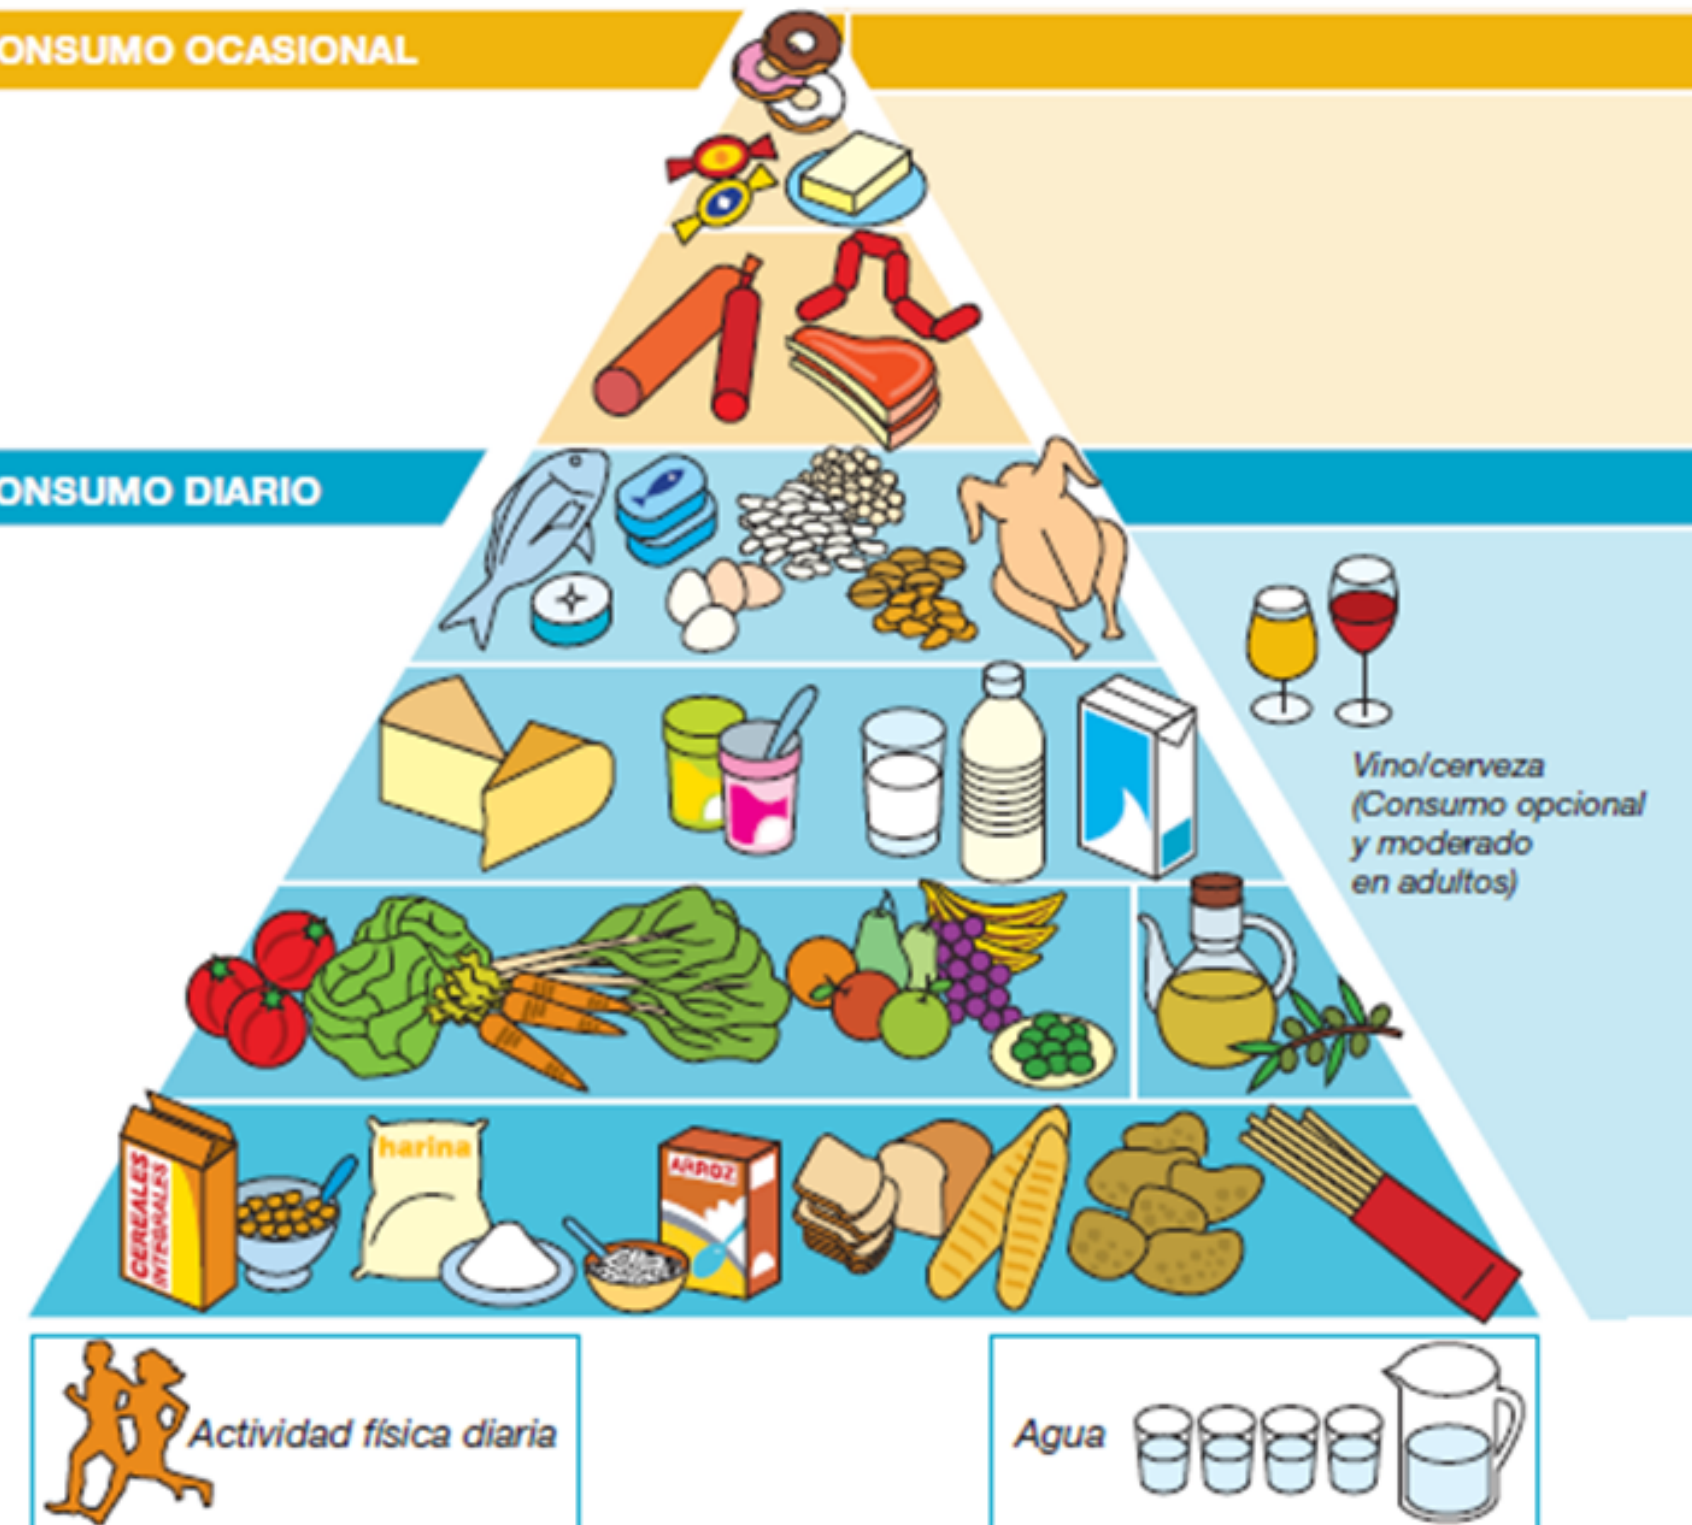

# ¿CÓMO TENER UNA ALIMENTACIÓN SALUDABLE?

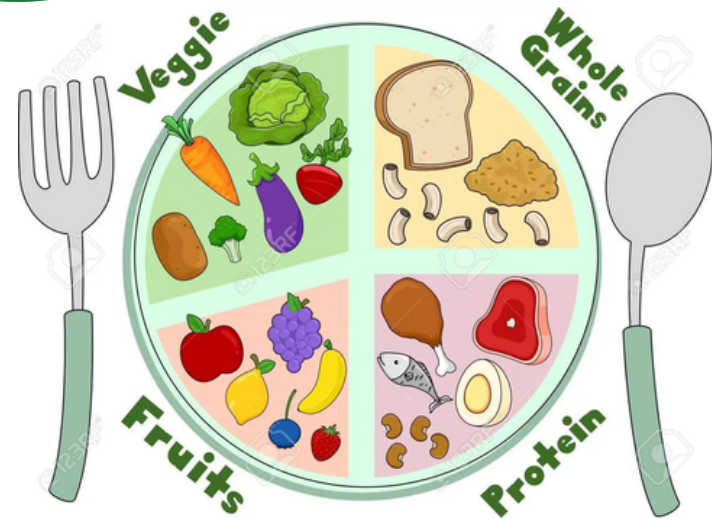

**Incorporar a diario alimentos de todos los grupos**

**Consumir legumbres, cereales preferentemente integrales**

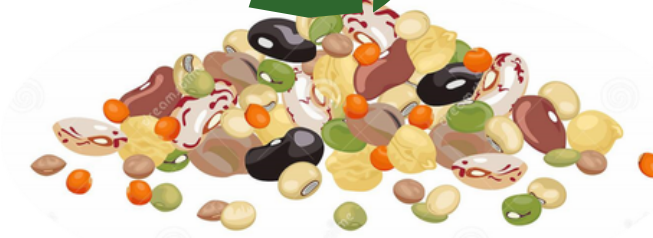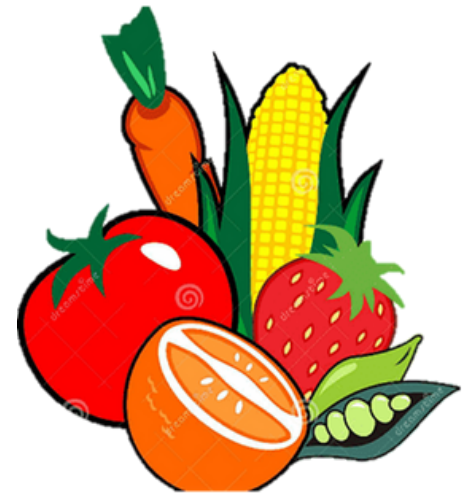

**Consumir a diario 5 porciones de frutas y verduras en variedad de tipos y colores**

**Establece tus horarios al alimentarte**

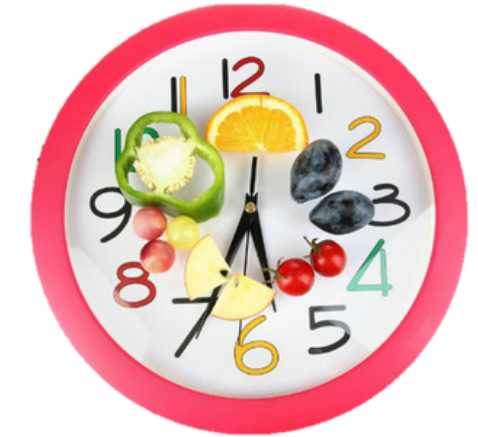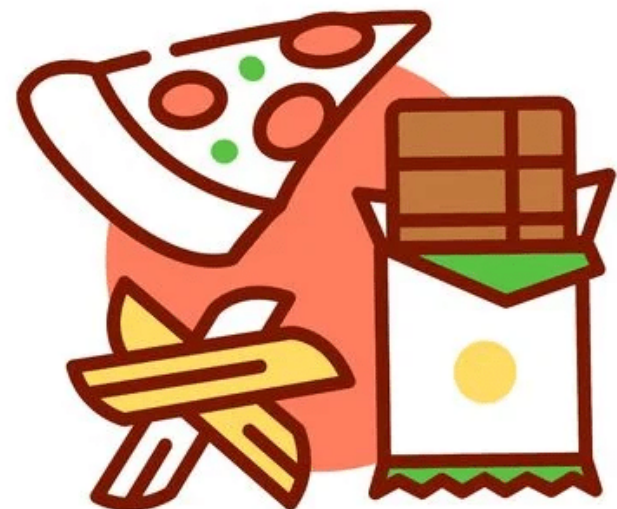

**Moderar el consumo de carnes grasas, rojas y procesadas, pastelería, bollería, azúcares, así como productos y bebidas con azúcares añadidos.**

**Realice actividad física**

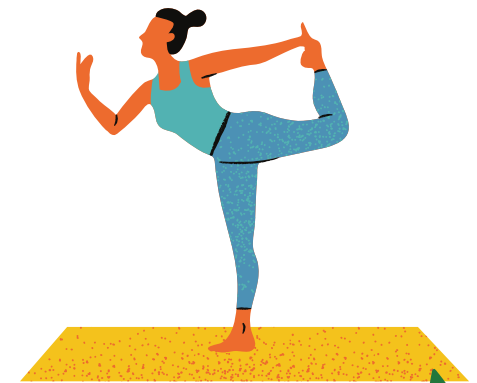

**Beba 8 vasos de agua**

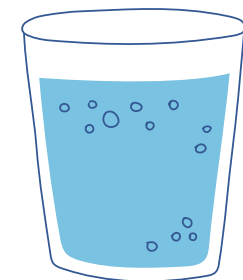

## PLATO SALUDABLE

25%

### Proteínas:

Carne, pescado,  
huevo/ legumbres  
(Prot. vegetal)

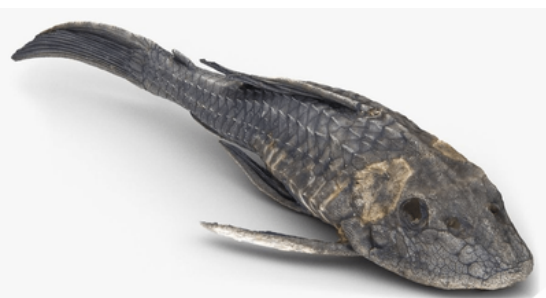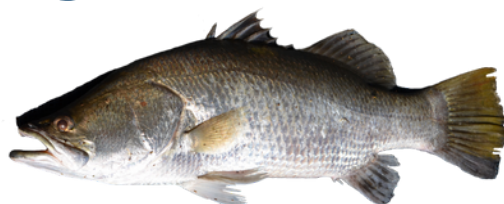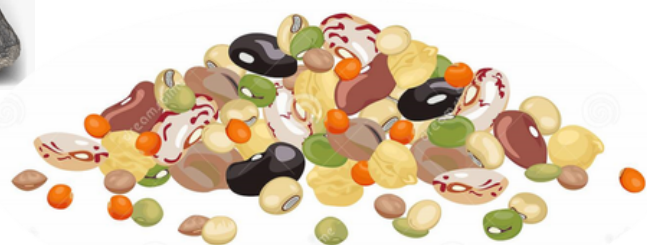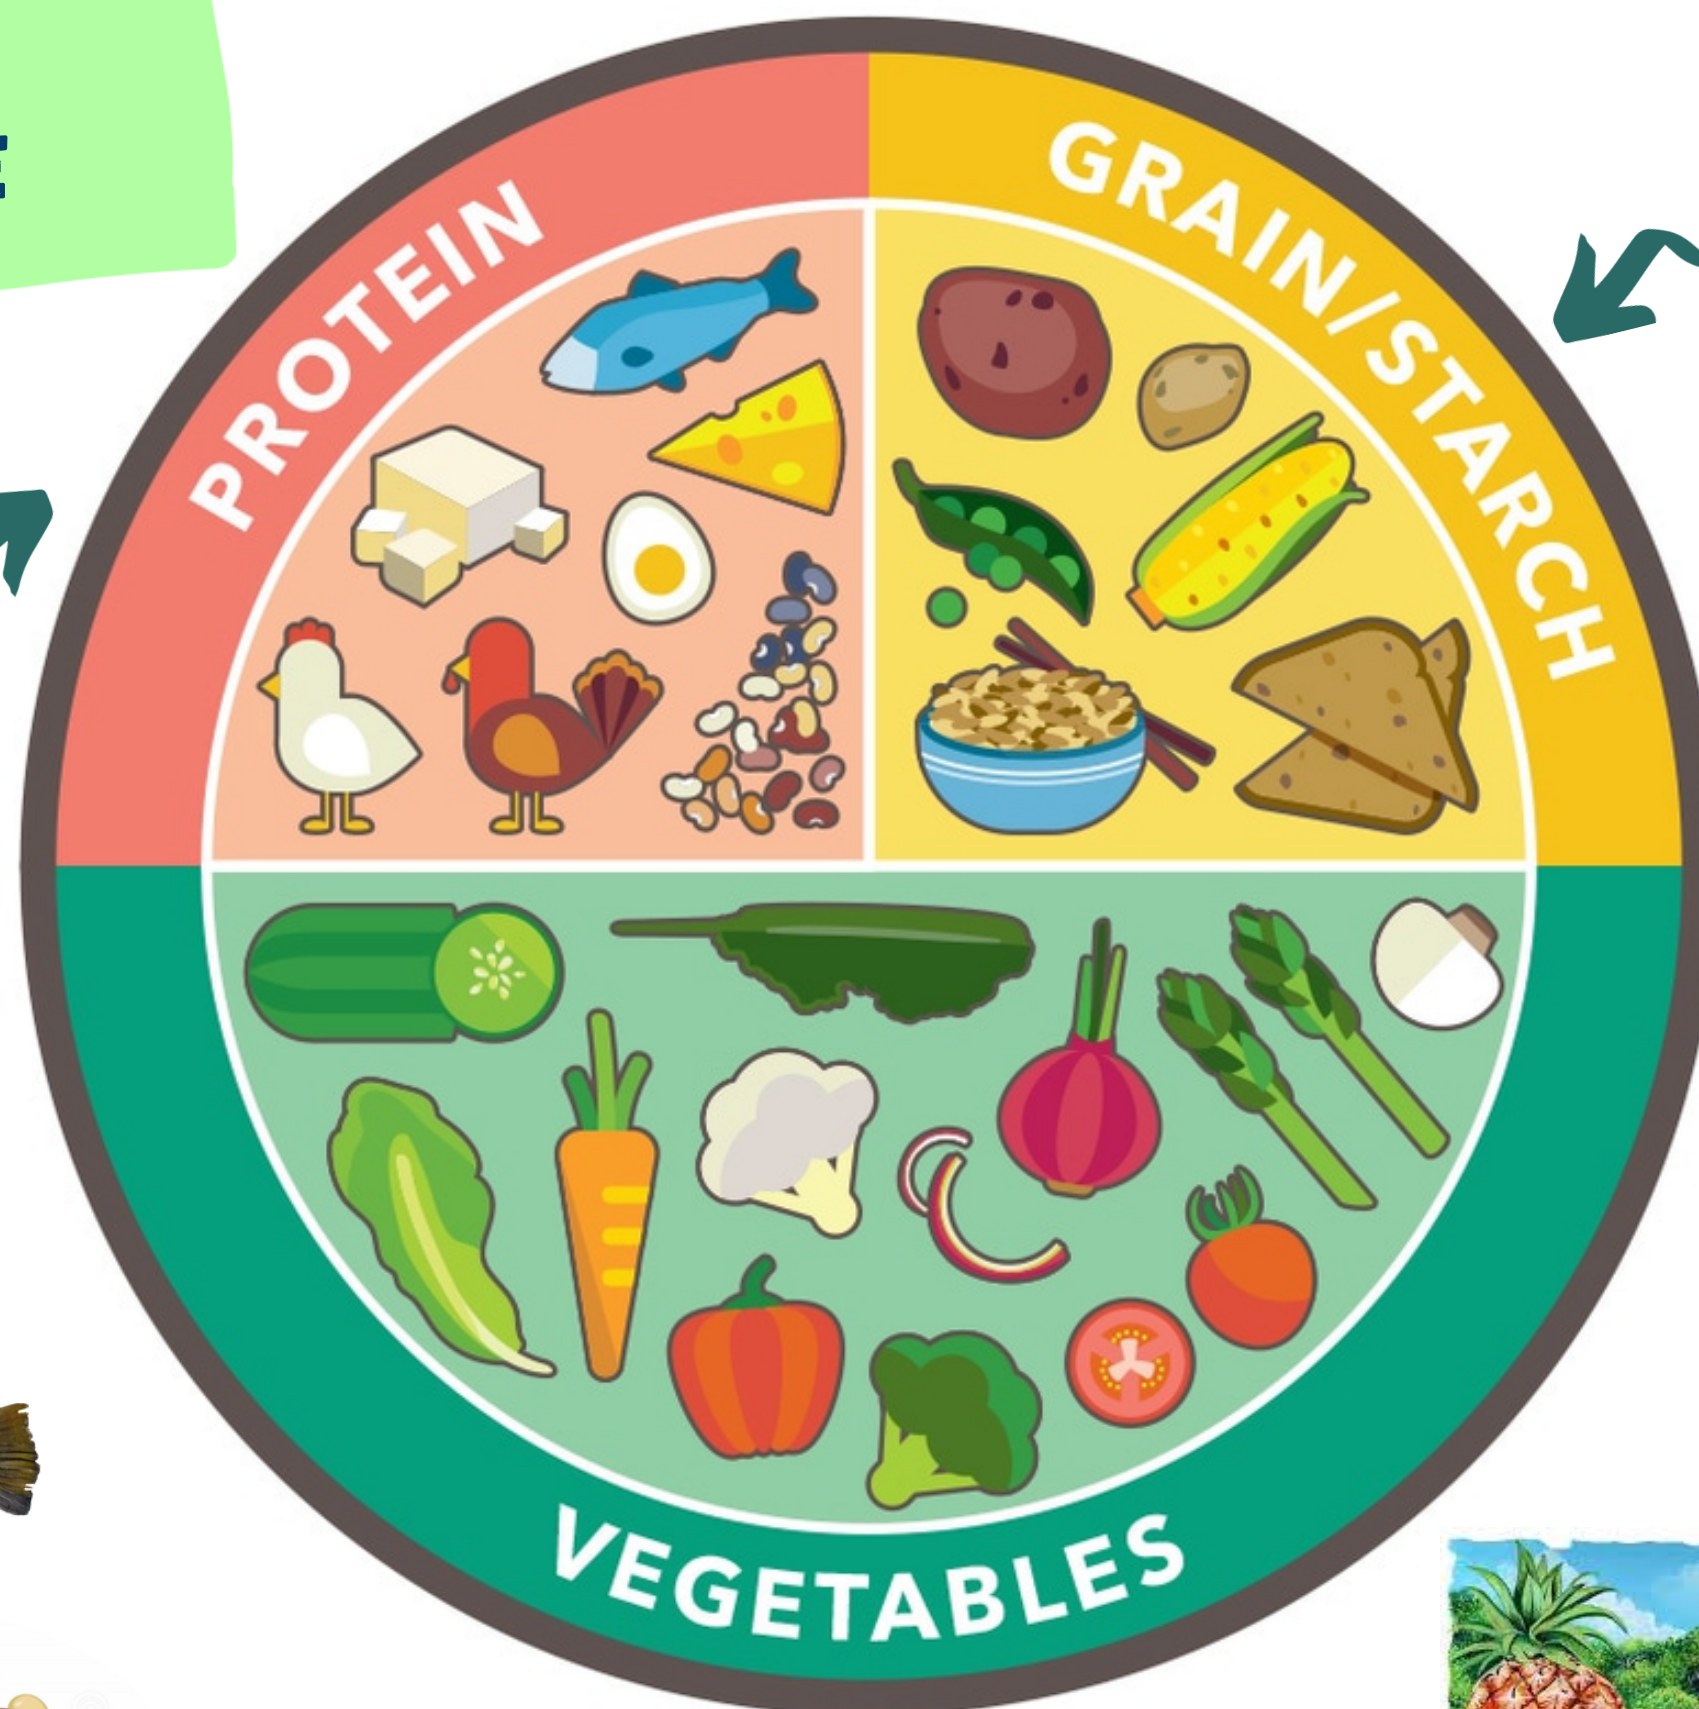

25%

**Carbohidratos:**  
Granos integrales  
y tubérculos

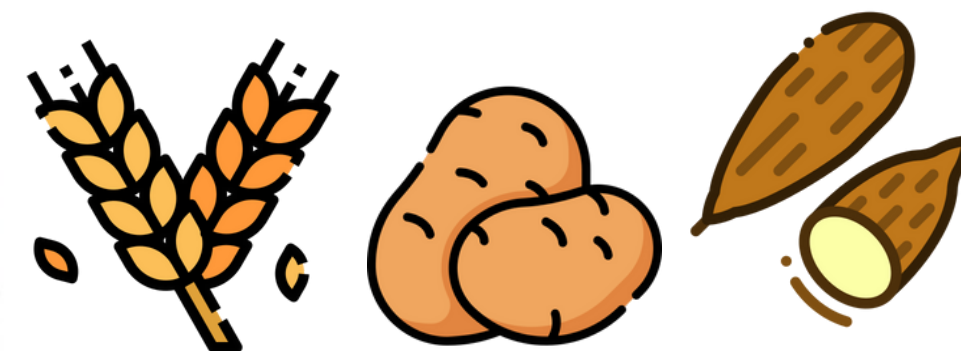

50%

### Vegetales:

Frutas y  
verduras de  
varios colores

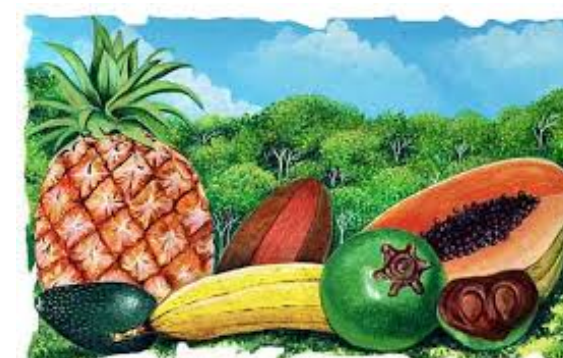

# ANEMIA

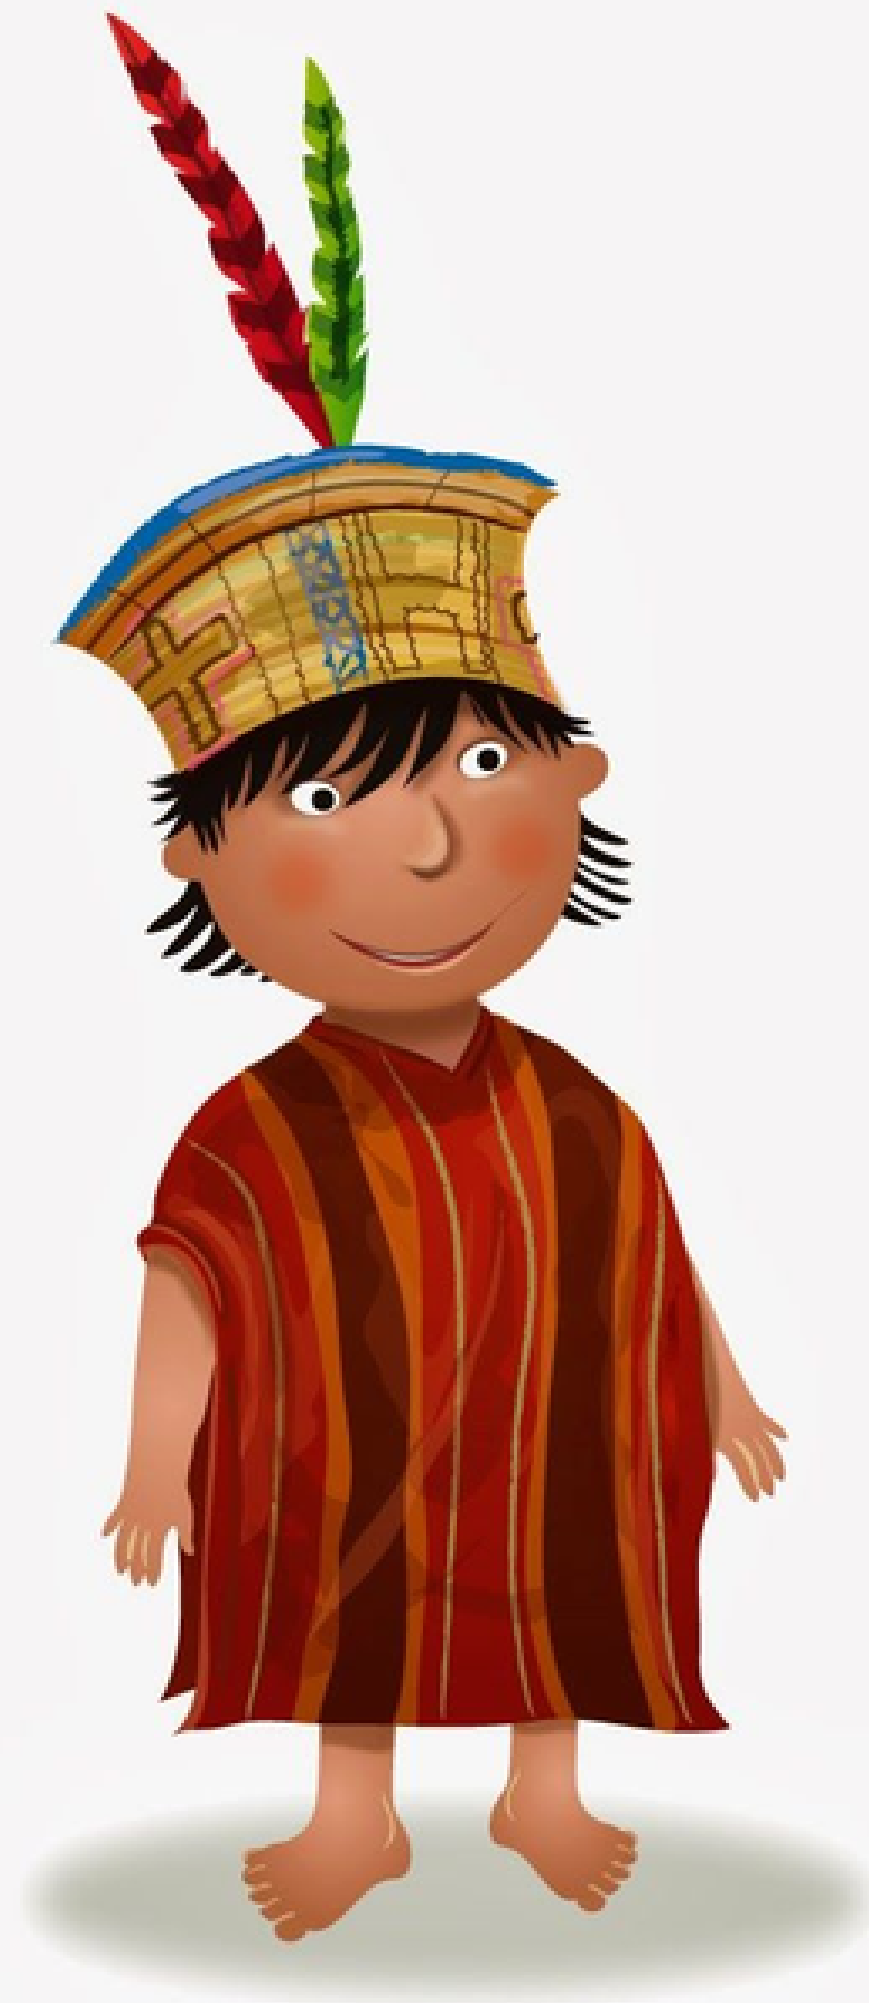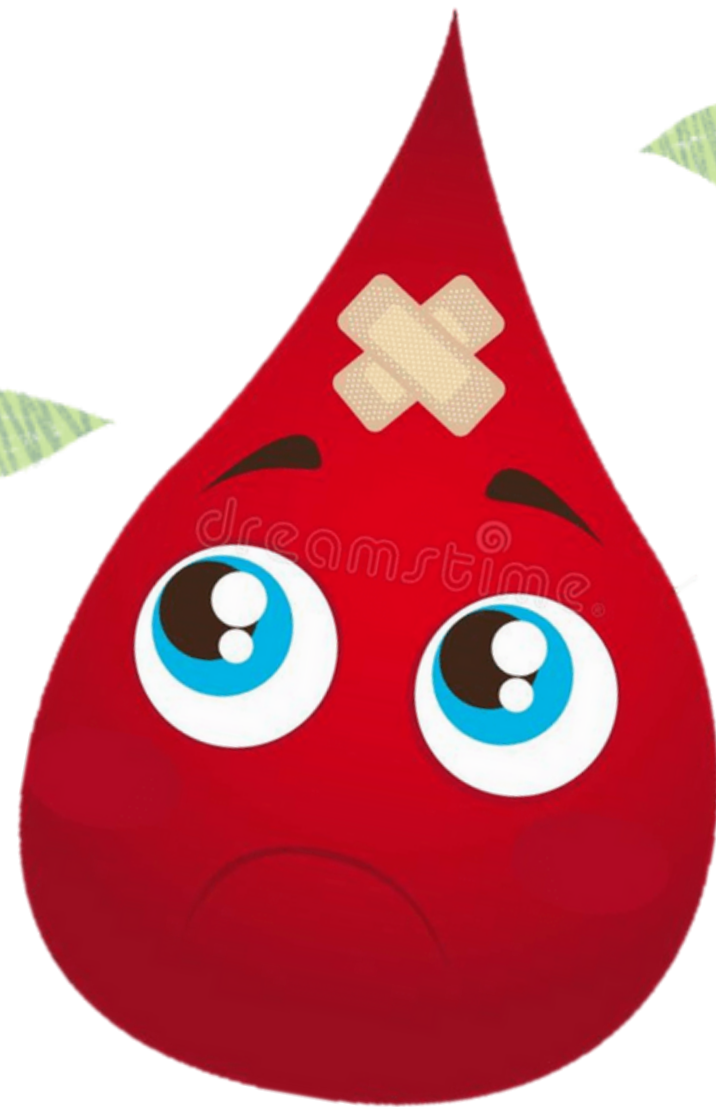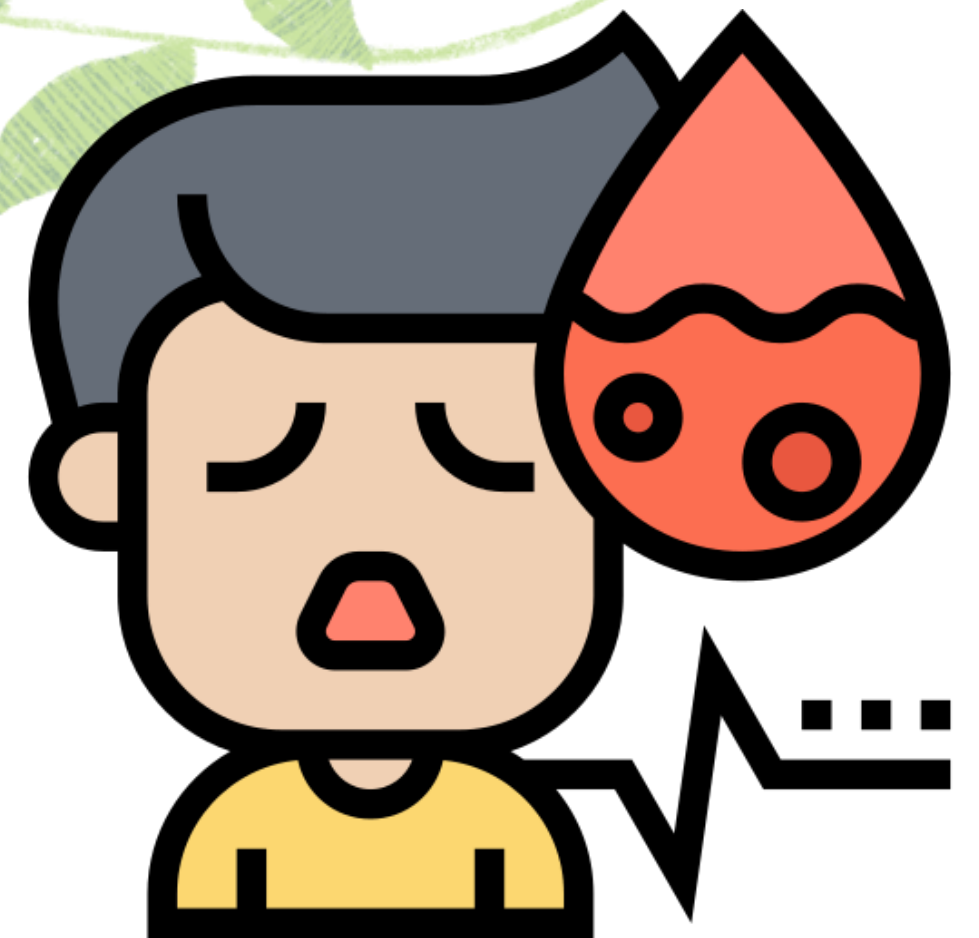

## ¿QUÉ ES LA ANEMIA?

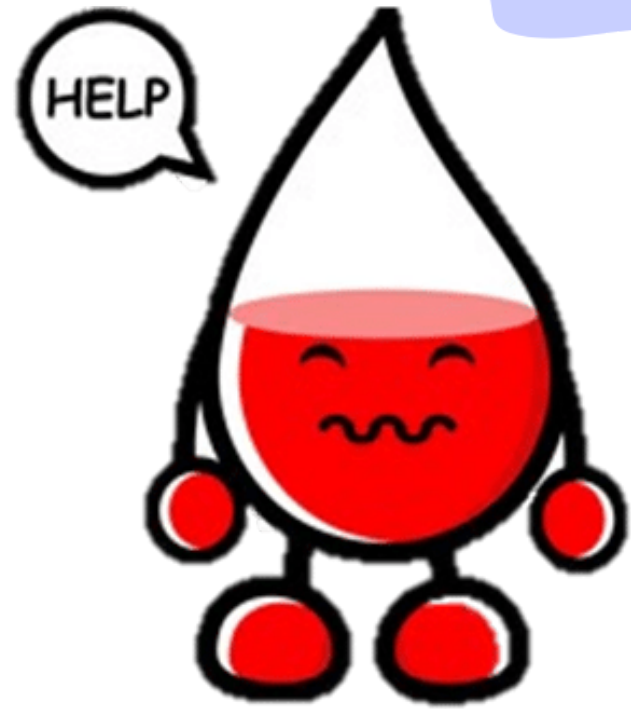

Trastorno en el cual el número de eritrocitos (y, por consiguiente, la capacidad de transporte de oxígeno del sangre) es insuficiente para satisfacer las necesidades del organismo. La carencia de hierro es la causa más común de anemia, pero pueden causarle otras carencias

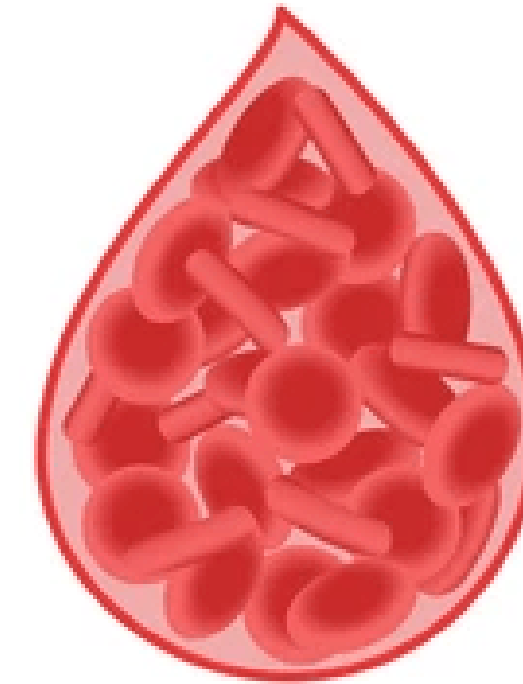

NORMAL

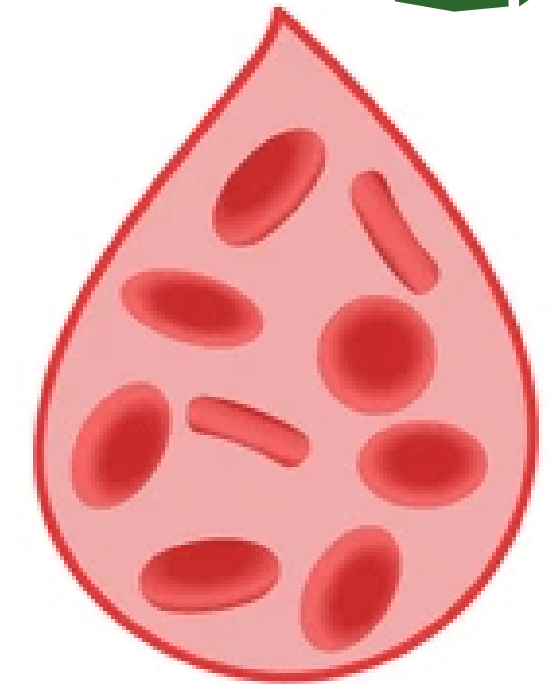

ANEMIA

### ANEMIA FERROPÉNICA

Causada por deficiencia de hierro

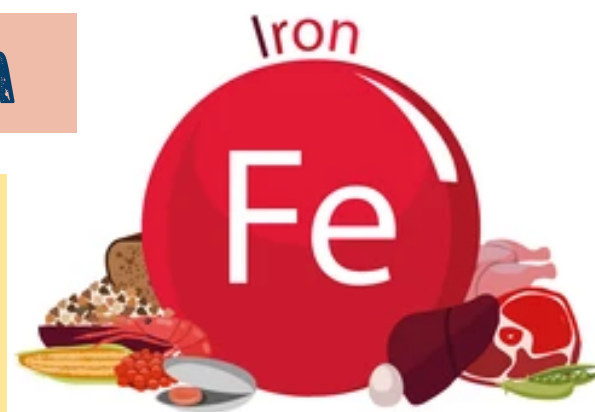

### VALORES BIOQUÍMICOS:

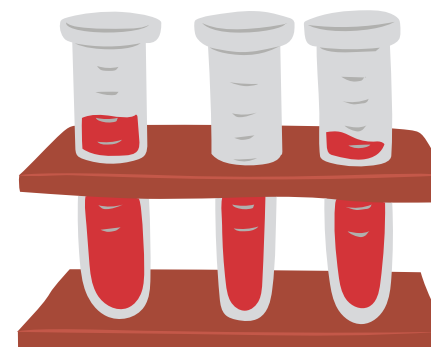

| Criterio    | Varones      | Mujeres      |
|-------------|--------------|--------------|
| Hemoglobina | 12 a 18 g/dl | 12 a 16 g/dl |
| Hematocrito | 42 a 47%     | 37 a 47%     |

## **SIGNOS Y SÍNTOMAS**

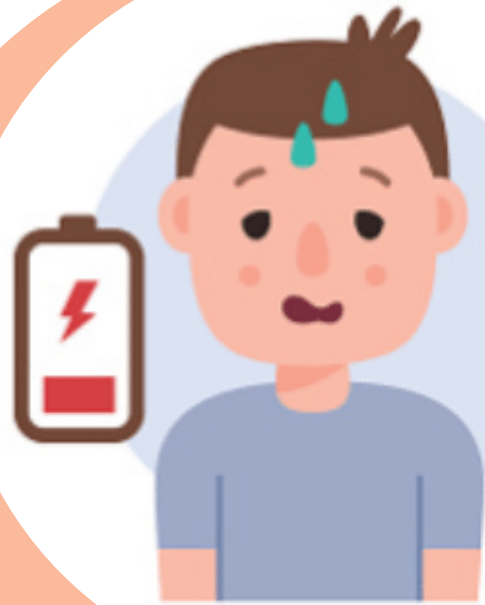

**Fatiga - Debilidad**

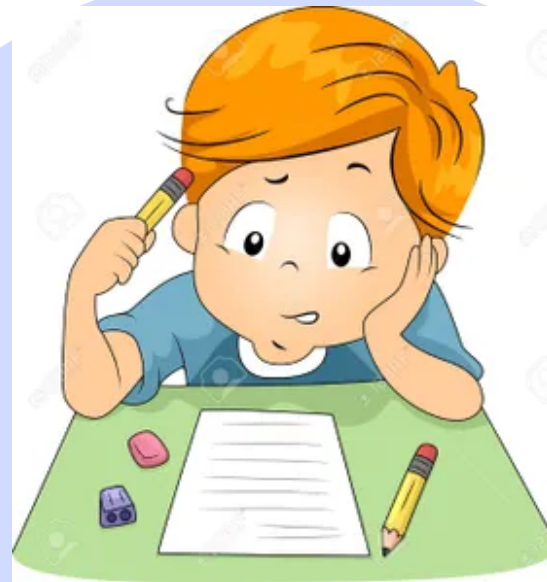

**Bajo rendimiento académico**

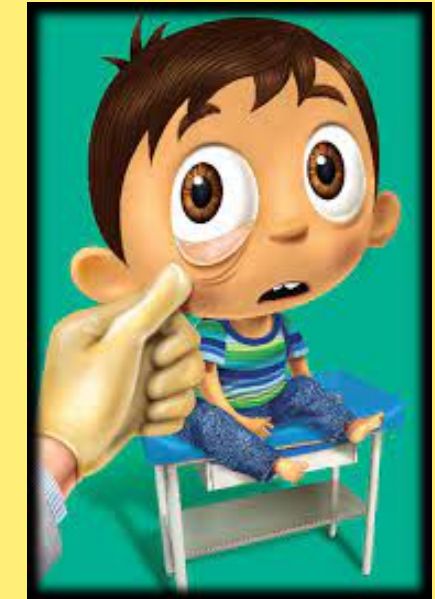

**Piel pálida o amarillenta**

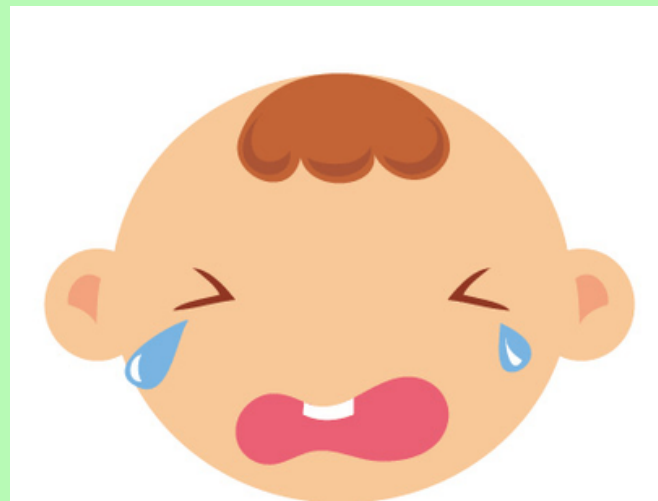

**Irritabilidad**

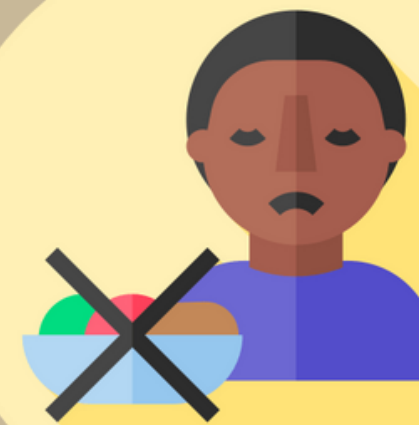

**Pérdida de  
apetito**

## COMPLICACIONES

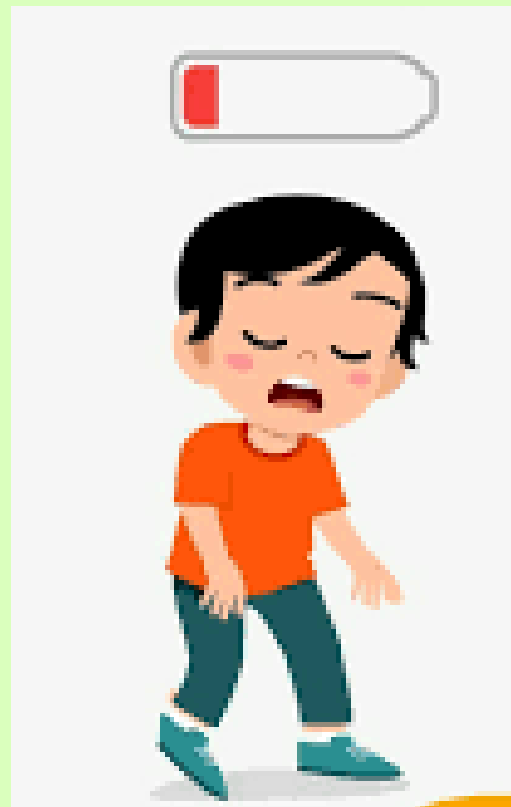

**Disminución del  
rendimiento físico**

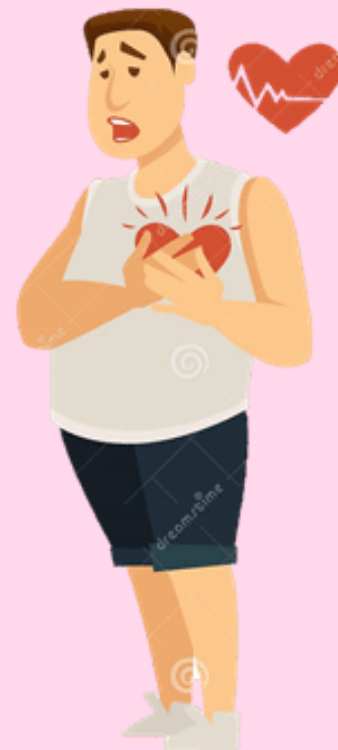

**insuficiencia  
cardíaca**

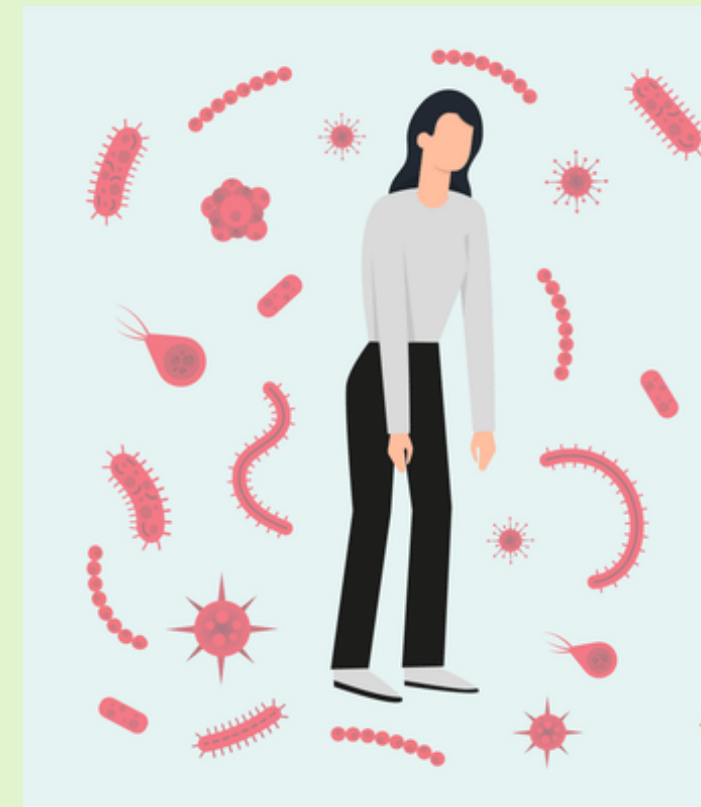

**Alteraciones del  
sistema inmunitario.**

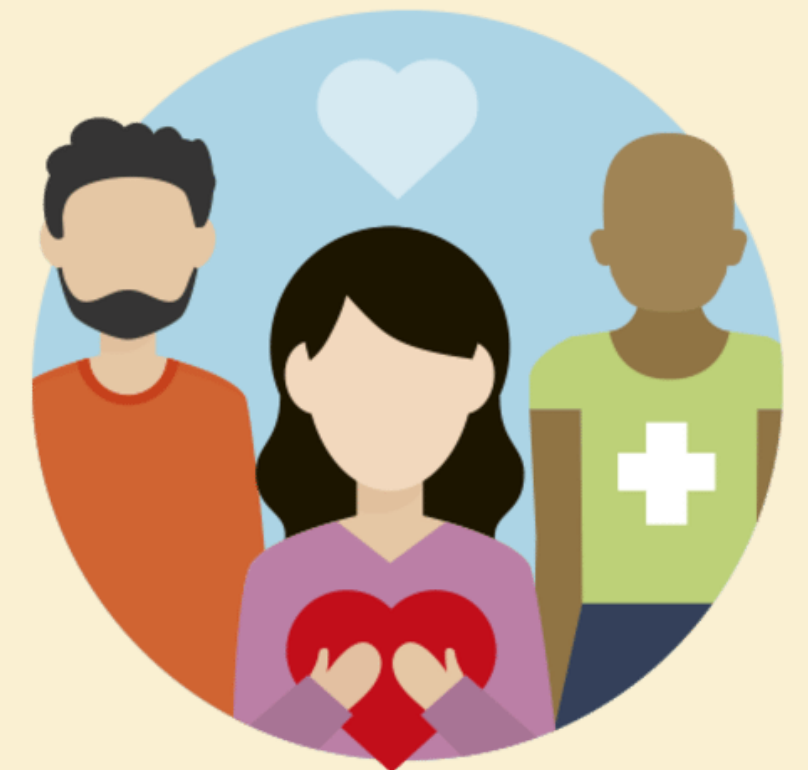

**Afecta la calidad de  
vida**

# ¿CÓMO CONTROLAR LA ANEMIA?

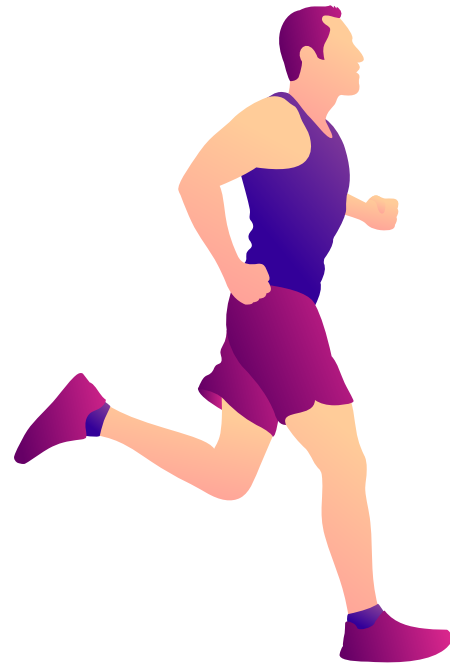

**Realice  
actividad física**

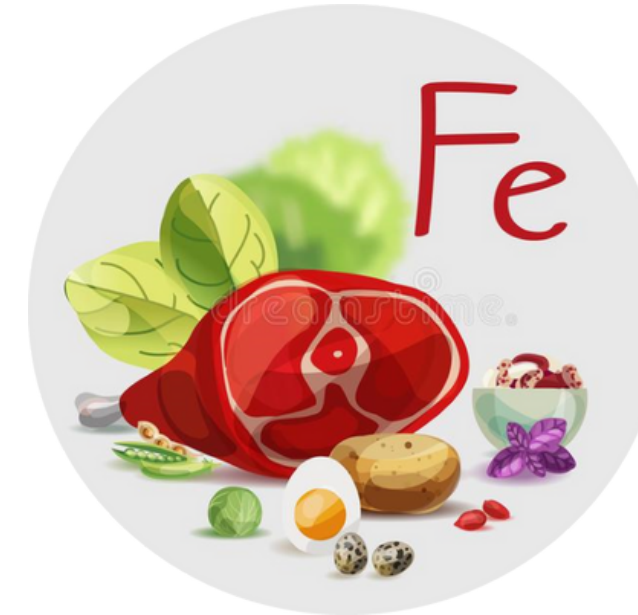

**Consuma alimentos fuente  
de hierro**

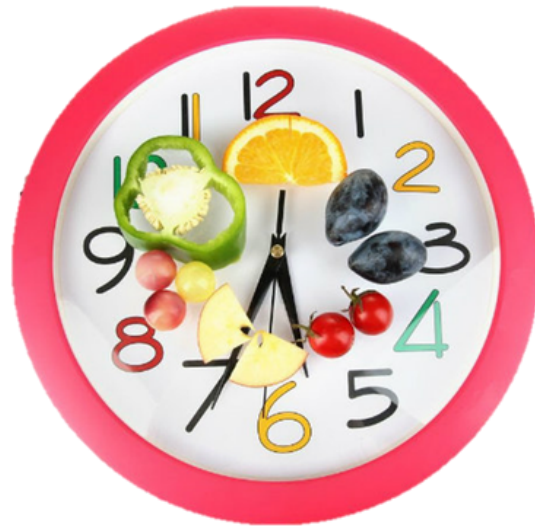

**Establece tus  
horarios al  
alimentarte**

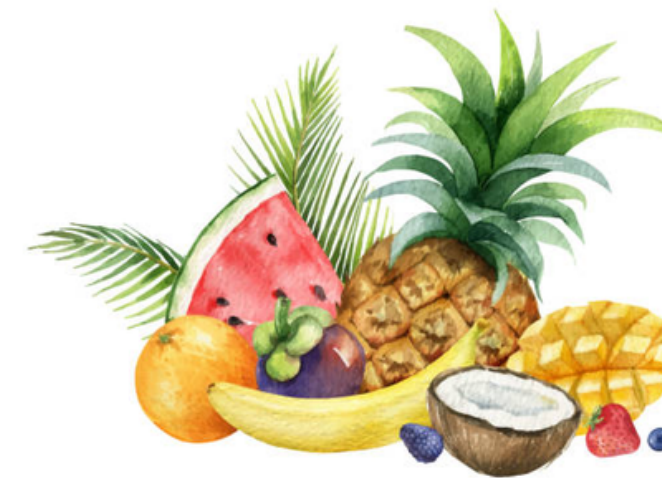

**Consuma alimentos ricos  
en vitamina C**

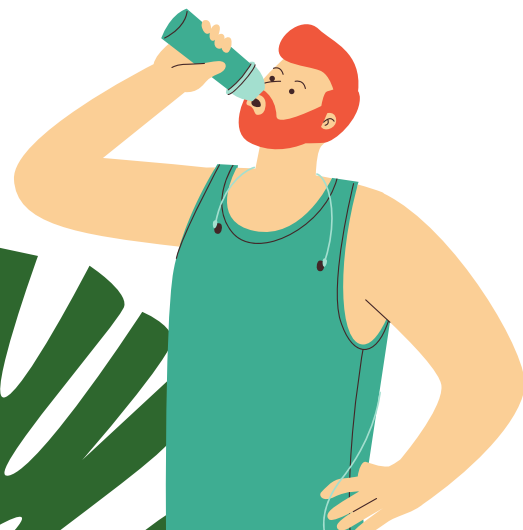

**Beba 8 vasos  
de agua**

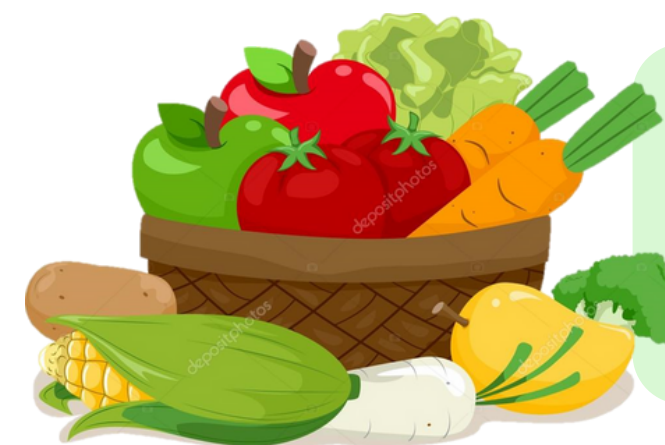

**Mantenga una alimentación  
saludable**

# ALIMENTOS FUENTE DE HIERRO

**Fuente animal: Contenido de hierro en 2  
cucharadas (30 g)**

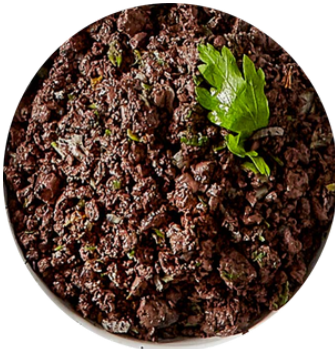

**Sangrecita de res**  
**18.4 g**

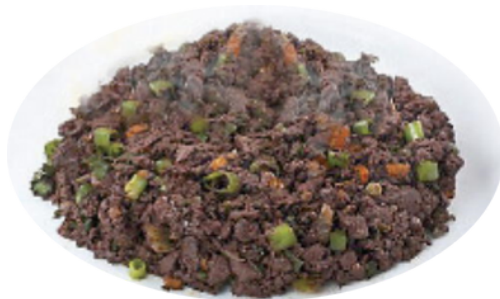

**Sangrecita de carnero**  
**17.8 g**

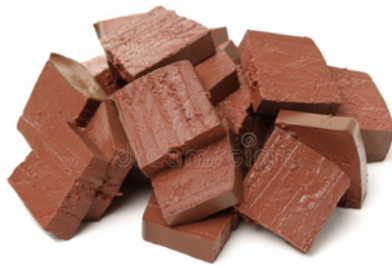

**Sangrecita de pollo**  
**8.9 g**

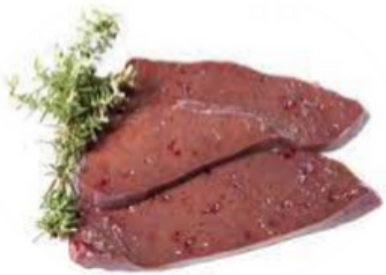

**Bazo de res**  
**8.6 g**

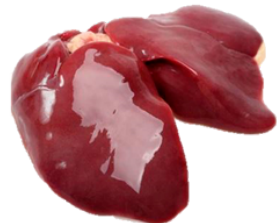

**Hígado de pollo**  
**2.6 g**

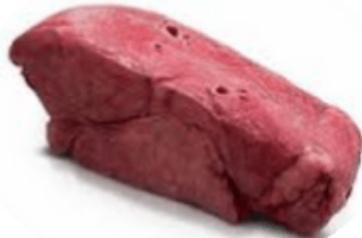

**Pulmón de res**  
**2 g**

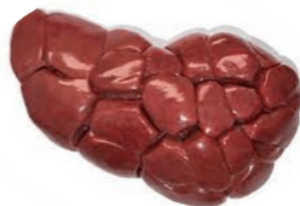

**Riñón de res**  
**2 g**

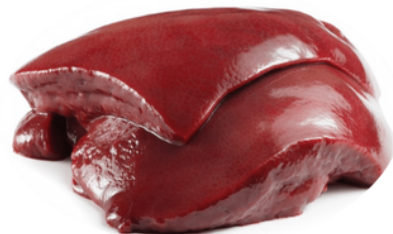

**Hígado de res**  
**1.6 g**

**Fuente vegetal: Contenido  
de hierro en 100 gr**

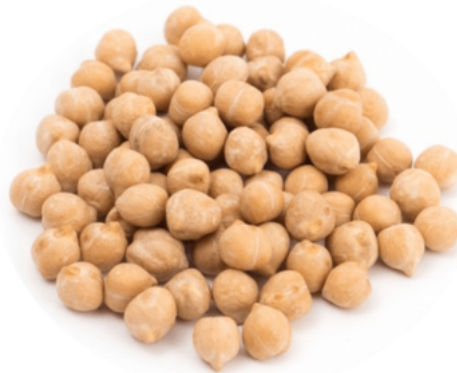

**Garbanzo**  
**6.26 g**

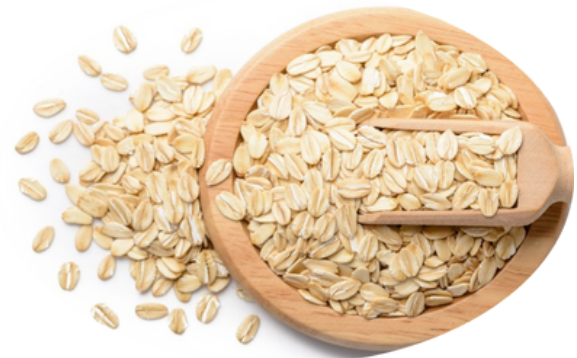

**Avena**  
**4.20 g**

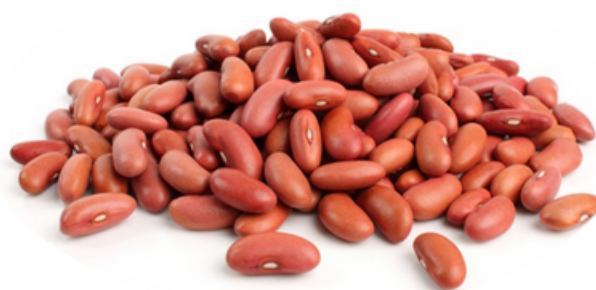

**Frijol**  
**3.69 g**

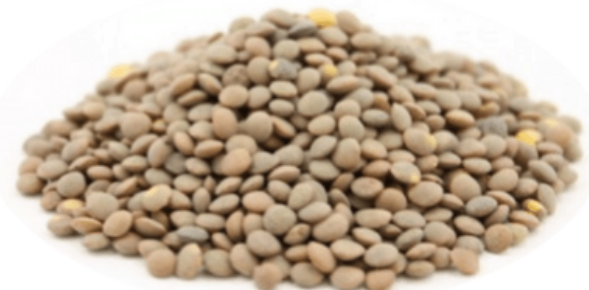

**Lenteja**  
**3.33 g**

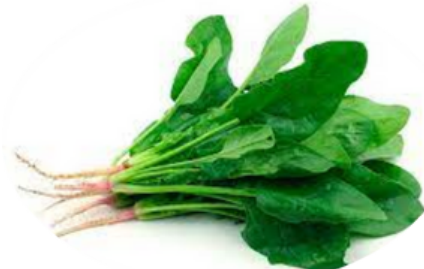

**Espinaca**  
**3.57 g**

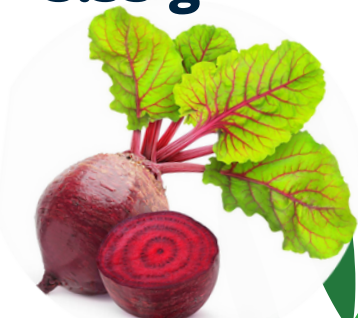

**Betarraga**  
**3.30 g**

## MEJORAN LA ABSORCIÓN DE HIERRO

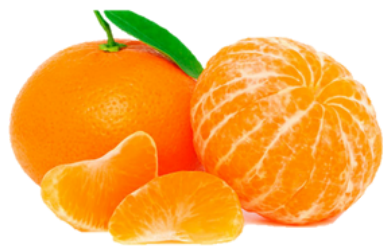

Mandarina

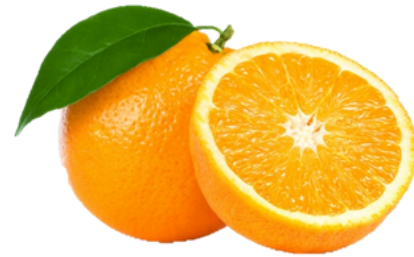

Naranja

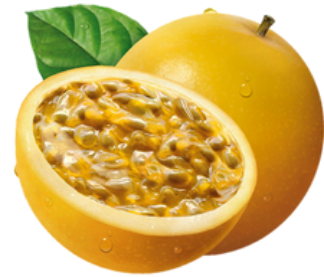

Maracuyá

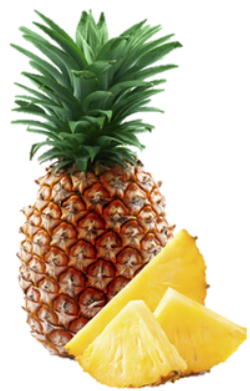

Piña

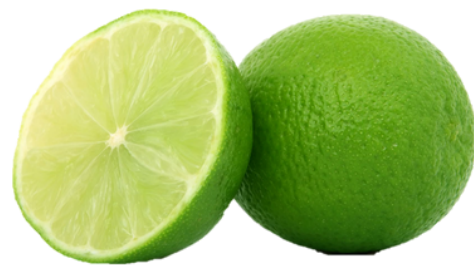

Limón

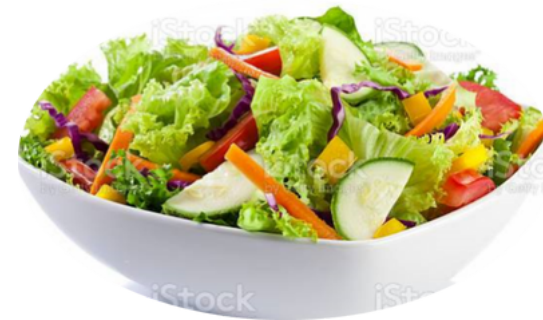

Ensalada

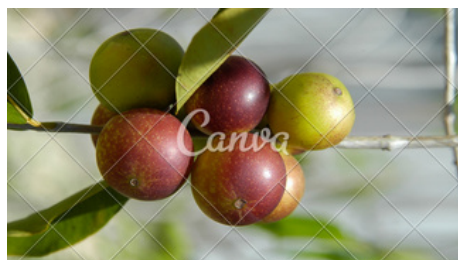

Camú Camú

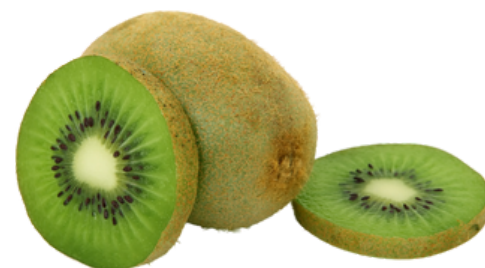

Kiwi

## RESTRINGIR LOS INHIBIDORES

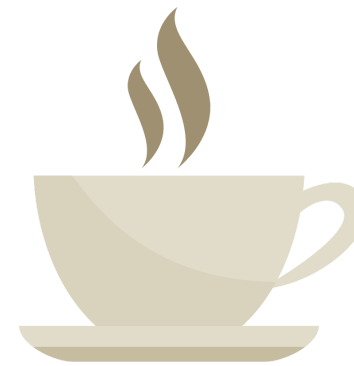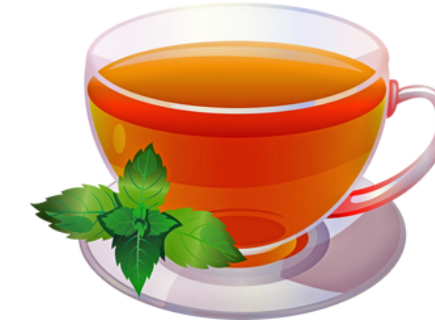

Polifenoles (Té, café)

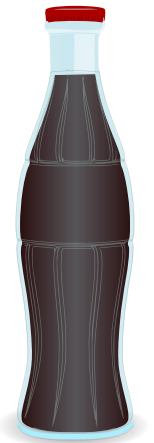

Gaseosa

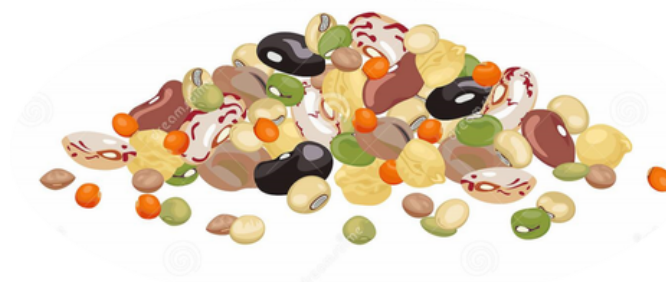

Fitatos (cereales  
integrales y  
legumbres)

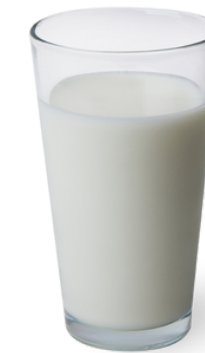

Calcio

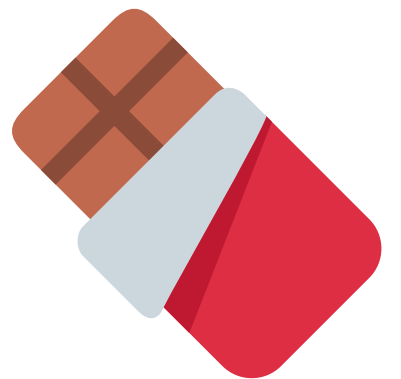

Chocolates

**NO LOS CONSUMAS JUNTO CON LAS  
COMIDAS**

# SUPLEMENTACIÓN

## SUPLEMENTACIÓN CON MICRONUTRIENTES

Vitamina A

Zinc

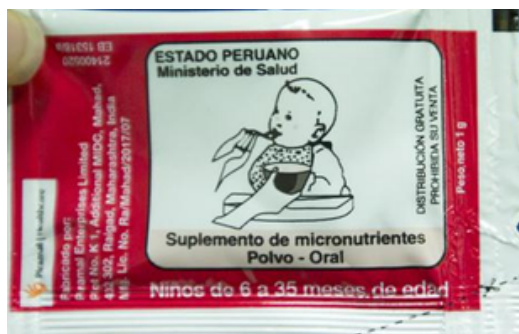

Vitamina C

Hierro

Ácido fólico

IMPORTANCIA

Contribuye a la prevención y recuperación de la anemia por deficiencia de hierro en niños y niñas

El micronutriente llega a cubrir la brecha de requerimiento de hierro en un niño

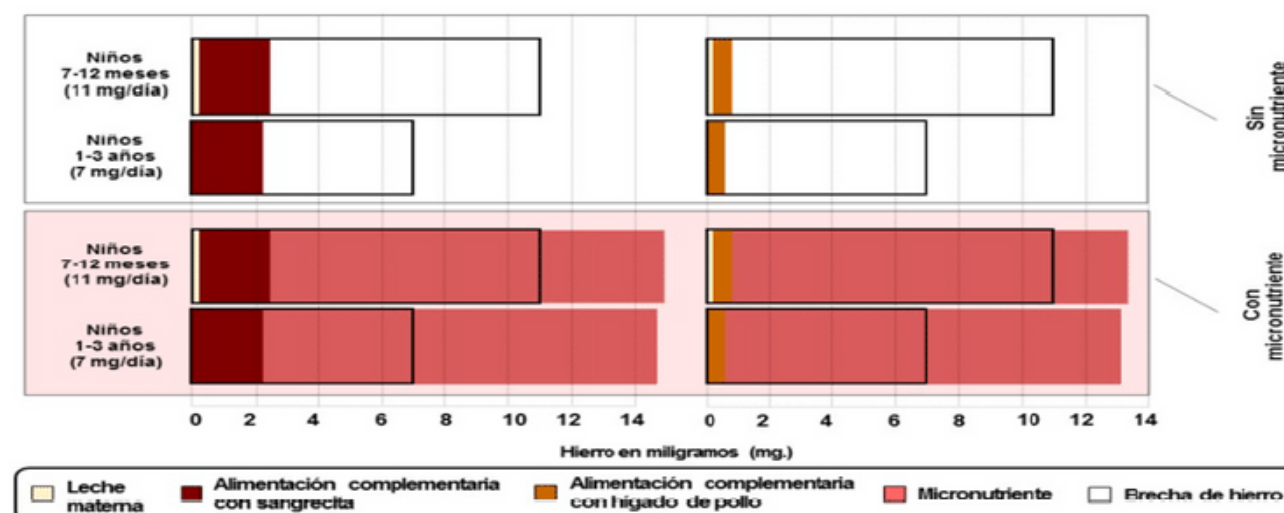

## FUNCIÓN EN LA ANEMIA

Vitamina A

La deficiencia de vitamina A perjudica la utilización del hierro, ya que ayuda a su disponibilidad.

Vitamina C

Aumenta la absorción de hierro a partir de la totalidad de la comida

Zinc

Ayuda en el metabolismo de la vitamina A.

Hierro

Ayuda en la producción de glóbulos rojos evitando así la anemia.

Ácido fólico

Ayuda a la formación de los glóbulos rojos, de manera que contribuye en la prevención de la anemia.

¿PARA QUIÉNES SON?

Para niños y niñas de 04 a 35 meses

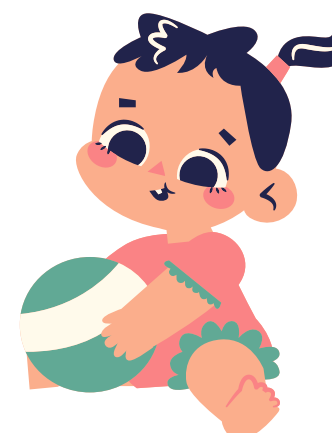

## ¿TIENE EFECTOS SECUNDARIOS?

Los micronutrientes pueden ocasionar deposiciones oscuras o deposiciones sueltas. Estas molestias son leves y desaparecen en dos semanas

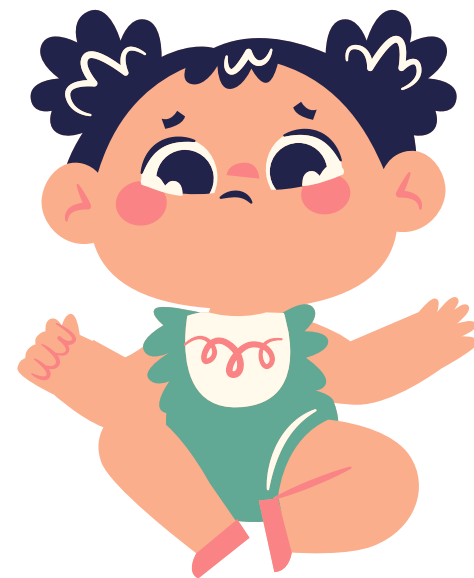

## TIEMPO DE CONSUMO

La niña o el niño tienen que consumir un sobrecito todos los días durante 12 meses seguidos. Si no se inició a los 4 meses la suplementación de micronutrientes, puede hacerlo en los meses siguientes hasta los tres años de edad de la niña o niño.

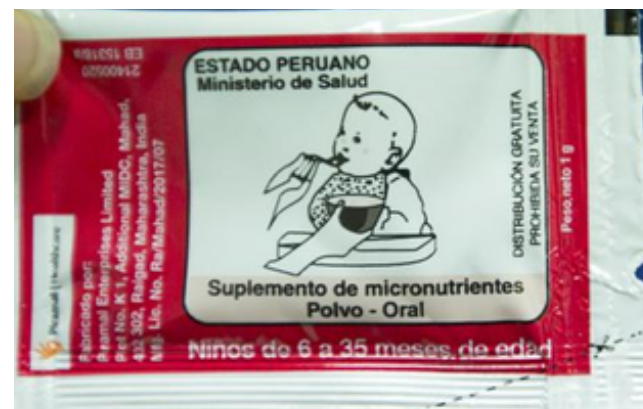

## ¿MODO DE PREPARACIÓN?

La forma como se preparan los micronutrientes es muy importante, ya que de esto depende que el niño acepte la comida que se le da.

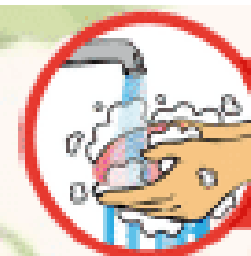

**Paso 1**

Lávate las manos con agua y jabón.

Separa dos cucharadas de comida espesa (puré, mazamorra o segundo) y déjala entibiar.

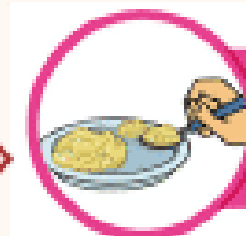

**Paso 2**

**Paso 3**

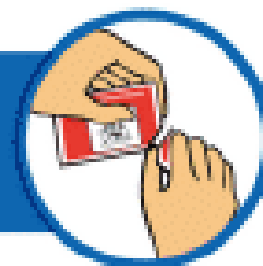

Abre el sobre de micronutrientes por el costado

Cuando la comida esté tibia, echa todo el contenido del micronutriente en la porción que separaste.

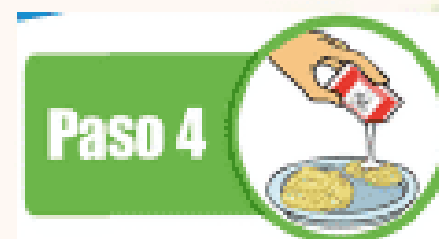

**Paso 4**

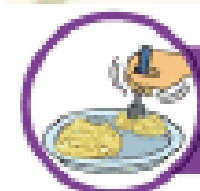

**Paso 5**

Mezcla bien las dos cucharadas de comida con los micronutrientes.

Apenas la mezcla esté lista, dale de comer a la niña o niño estas dos cucharadas de comida separada y luego continúa con el resto de la comida.

**Paso 6**

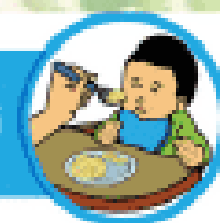

# SUPLEMENTACIÓN CON SULFATO FERROSO

Existe diversas presentaciones para el manejo terapéutico y preventivo de la anemia

| PRESENTACION | PRODUCTO                       | CONTENIDO DE HIERRO ELEMENTAL                                                                                                              |
|--------------|--------------------------------|--------------------------------------------------------------------------------------------------------------------------------------------|
| GOTAS        | Sulfato Ferroso                | 1 gota = 1,25 mg Hierro elemental                                                                                                          |
|              | Complejo Polimaltosado Férrico | 1 gota = 2,5 mg Hierro elemental                                                                                                           |
| JARABE       | Sulfato Ferroso                | 1 ml = 3 mg de Hierro elemental.                                                                                                           |
|              | Complejo Polimaltosado Férrico | 1 ml= 10 mg de Hierro elemental.                                                                                                           |
| TABLETAS     | Sulfato Ferroso                | 60 mg de Hierro elemental                                                                                                                  |
|              | Polimaltosado                  | 100 mg de Hierro elemental                                                                                                                 |
| POLVO        | Micronutrientes                | Hierro (12,5 mg Hierro elemental)<br>Zinc (5 mg)<br>Ácido fólico (160 ug)<br>Vitamina A (300 ug Retinol Equivalente)<br>Vitamina C (30 mg) |

- El suplemento se da una sola vez al día. En efectos adversos se
- fracciona las dosis hasta 2 tomas.
- Debe realizarse durante seis meses.
- Consumo alejado de las comidas, de preferencia 1 a 2 horas después.
- En caso de estreñimiento, pasara con el adecuado consumo de frutas,
- agua , verduras.
- La anemia se descarta desde los 4 meses de edad

## SUPLEMENTACIÓN PREVENTIVA

- La suplementación preventiva se iniciara con gotas a los 4 meses de vida(Sulfato ferroso o complejo polimaltosado férrico en gotas).
- Se administrara la suplementación preventiva en dosis de 2 mg/kg/dia hasta que se cumplan los seis meses.
- Luego se continuara con la suplementación preventiva mediante la entrega de las gotas o jarabe según su peso desde los 6 meses de edad hasta el año de edad.
- El niño que no recibió suplementación con hierro a los 6 meses, lo podrá iniciar en cualquier edad, dentro del rango de 6 meses a 3 años.
- En el caso de suspenderse el consumo del suplemento , se deberá continuar con el esquema hasta completar los 6 meses Evitar tiempos prolongados de deserción; en caso de suspension mayor a un mes se reinicia el esquema.

| CONDICIÓN DEL NIÑO                                  | EDAD DE ADMINISTRACIÓN                      | DOSIS <sup>1</sup> (Vía oral) | PRODUCTO A UTILIZAR                                                | DURACIÓN                                          |
|-----------------------------------------------------|---------------------------------------------|-------------------------------|--------------------------------------------------------------------|---------------------------------------------------|
| Niños con bajo peso al nacer y/o prematuros         | Desde los 30 días hasta los 6 meses         | 2 mg/kg/día                   | Gotas Sulfato Ferroso<br>o<br>Gotas Complejo Polimaltosado Férrico | Suplementación diaria hasta los 6 meses cumplidos |
|                                                     | Desde los 6 meses de edad                   | 1 sobre diario                | Micronutrientes: Sobre de 1 gramo en polvo                         | Hasta que complete el consumo de 360 sobres       |
| Niños nacidos a término, con adecuado peso al nacer | Desde los 4 meses de edad hasta los 6 meses | 2 mg/kg/día                   | Gotas Sulfato Ferroso<br>o<br>Gotas Complejo Polimaltosado Férrico | Suplementación diaria hasta los 6 meses cumplidos |
|                                                     | Desde los 6 meses de edad                   | 1 sobre diario                | Micronutrientes*: Sobre de 1 gramo en polvo                        | Hasta que complete el consumo de 360 sobres       |

\* Si el EESS no cuenta con Micronutrientes podrá seguir usando las gotas o jarabe según el peso corporal

TRATAMIENTO EN LOS NIÑOS MENORES DE 6 MESES CON BAJO PESO

| CONDICIÓN                                 | EDAD DE ADMINISTRACIÓN | DOSIS <sup>2</sup><br>(Vía oral) | PRODUCTO                                                                 | DURACIÓN                   | CONTROL DE HEMOGLOBINA                             |
|-------------------------------------------|------------------------|----------------------------------|--------------------------------------------------------------------------|----------------------------|----------------------------------------------------|
| Niño prematuro y/o con bajo peso al nacer | Desde 30 días de edad  | 4 mg/Kg/día                      | Gotas de Sulfato Ferroso<br>o<br>Gotas de Complejo Polimaltosado Férrico | Durante 6 meses continuos. | A los 3 meses y 6 meses de iniciado el tratamiento |

TRATAMIENTO EN LOS NIÑOS MENORES DE 6 MESES CON BUEN PESO

| CONDICIÓN                                   | EDAD DE ADMINISTRACIÓN                                        | DOSIS <sup>3</sup><br>(Vía oral)          | PRODUCTO                                                                 | DURACIÓN                   | CONTROL DE HEMOGLOBINA                                      |
|---------------------------------------------|---------------------------------------------------------------|-------------------------------------------|--------------------------------------------------------------------------|----------------------------|-------------------------------------------------------------|
| Niño a término y con adecuado peso al nacer | Cuando se diagnostique anemia (a los 4 meses o en el control) | 3 mg/Kg/día<br><br>Máxima dosis 40 mg/día | Gotas de Sulfato Ferroso<br>o<br>Gotas de Complejo Polimaltosado Férrico | Durante 6 meses continuos. | Al mes, a los 3 meses y 6 meses de iniciado el tratamiento. |

TRATAMIENTO EN NIÑOS DE 6 MESES A 11 AÑOS CON ANEMIA LEVE O MODERADA

| EDAD DE ADMINISTRACIÓN        | DOSIS <sup>4</sup><br>(Vía oral)                | PRODUCTO                                                                                                                                                    | DURACIÓN                  | CONTROL DE HEMOGLOBINA                                     |
|-------------------------------|-------------------------------------------------|-------------------------------------------------------------------------------------------------------------------------------------------------------------|---------------------------|------------------------------------------------------------|
| Niños de 6 a 35 meses de edad | 3 mg/Kg/día<br><br>Máxima dosis: 70 mg/día (2)  | Jarabe de Sulfato Ferroso<br>o<br>Jarabe de Complejo Polimaltosado Férrico<br>o<br>Gotas de Sulfato Ferroso<br>o<br>Gotas de Complejo Polimaltosado Férrico | Durante 6 meses continuos | Al mes, a los 3 meses y 6 meses de iniciado el tratamiento |
| Niños de 3 a 5 años de edad   | 3 mg/Kg/día<br><br>Máxima dosis: 90 mg/día (3)  | Jarabe de Sulfato Ferroso<br>o<br>Jarabe de Complejo Polimaltosado Férrico                                                                                  |                           |                                                            |
| Niños de 5 a 11 años          | 3 mg/Kg/día<br><br>Máxima dosis: 120 mg/día (4) | Jarabe de Sulfato Ferroso<br>o<br>Jarabe de Complejo Polimaltosado Férrico<br>o<br>1 tableta de Sulfato ferroso<br>o<br>1 tableta de Polimaltosado          |                           |                                                            |

TRATAMIENTO EN ADOLESCENTES DE 12 A 17 AÑOS CON ANEMIA LEVE Y MODERADA

| EDAD DE ADMINISTRACIÓN                           | DOSIS                                           | PRODUCTO                      | DURACIÓN                  | CONTROL DE HEMOGLOBINA                                            |
|--------------------------------------------------|-------------------------------------------------|-------------------------------|---------------------------|-------------------------------------------------------------------|
| Adolescentes (Hombres y Mujeres) de 12 a 17 años | 2 tabletas diarias (120 mg de hierro elemental) | 2 tabletas de Sulfato Ferroso | Durante 6 meses continuos | Al mes, a los 3 meses y a los 6 meses de iniciado el tratamiento. |

SUPLEMENTACIÓN PREVENTIVA CON HIERRO Y ÁCIDO FÓLICO EN LA MUJER GESTANTE Y PUÉRPERA

| INICIO ADMINISTRACIÓN                                           | DOSIS                                                      | PRODUCTO                                                                                                     | DURACIÓN                                        |
|-----------------------------------------------------------------|------------------------------------------------------------|--------------------------------------------------------------------------------------------------------------|-------------------------------------------------|
| Gestantes a partir de la semana 14 de gestación                 | 60 mg de hierro elemental<br>+<br>400 ug. de Ácido Fólico  | Tableta de Sulfato Ferroso<br>+<br>Ácido Fólico<br>o<br>Tableta de Hierro Polimaltosado<br>+<br>Ácido Fólico | 1 tableta al día hasta los 30 días post parto   |
| Gestantes que inician atención prenatal después de la semana 32 | 120 mg de hierro elemental<br>+<br>800 ug. de Ácido Fólico |                                                                                                              | 2 tabletas al día hasta los 30 días post parto. |
| Puérperas                                                       | 60 mg de hierro elemental<br>+<br>400 ug. de Ácido Fólico  |                                                                                                              | 1 tableta al día hasta los 30 días post parto   |

TRATAMIENTO DE ANEMIA CON HIERRO Y ÁCIDO FÓLICO EN GESTANTES Y PUÉRPERAS

| CONDICION DE ANEMIA | DOSIS                                                                                                                                                         | PRODUCTO                                                             | DURACION        | CONTROL DE HEMOGLOBINA                                                                                        |
|---------------------|---------------------------------------------------------------------------------------------------------------------------------------------------------------|----------------------------------------------------------------------|-----------------|---------------------------------------------------------------------------------------------------------------|
| Anemia Leve         | 120 mg de hierro elemental + 800 µg de Ácido Fólico Diario (2 tabletas diarias)                                                                               | Sulfato Ferroso + Ácido Fólico o Hierro Polimaltosado + Ácido Fólico | Durante 6 meses | Cada 4 semanas hasta que la hemoglobina alcance valores de 11 g/dl o más (valores ajustados a los 1000 msnm). |
| Anemia Moderada     |                                                                                                                                                               | Hierro Polimaltosado + Ácido Fólico                                  |                 |                                                                                                               |
| Anemia Severa       | Tratar inmediatamente como caso de anemia y referir a un establecimiento de mayor complejidad que brinde atención especializada (hematología y/o ginecología) |                                                                      |                 |                                                                                                               |

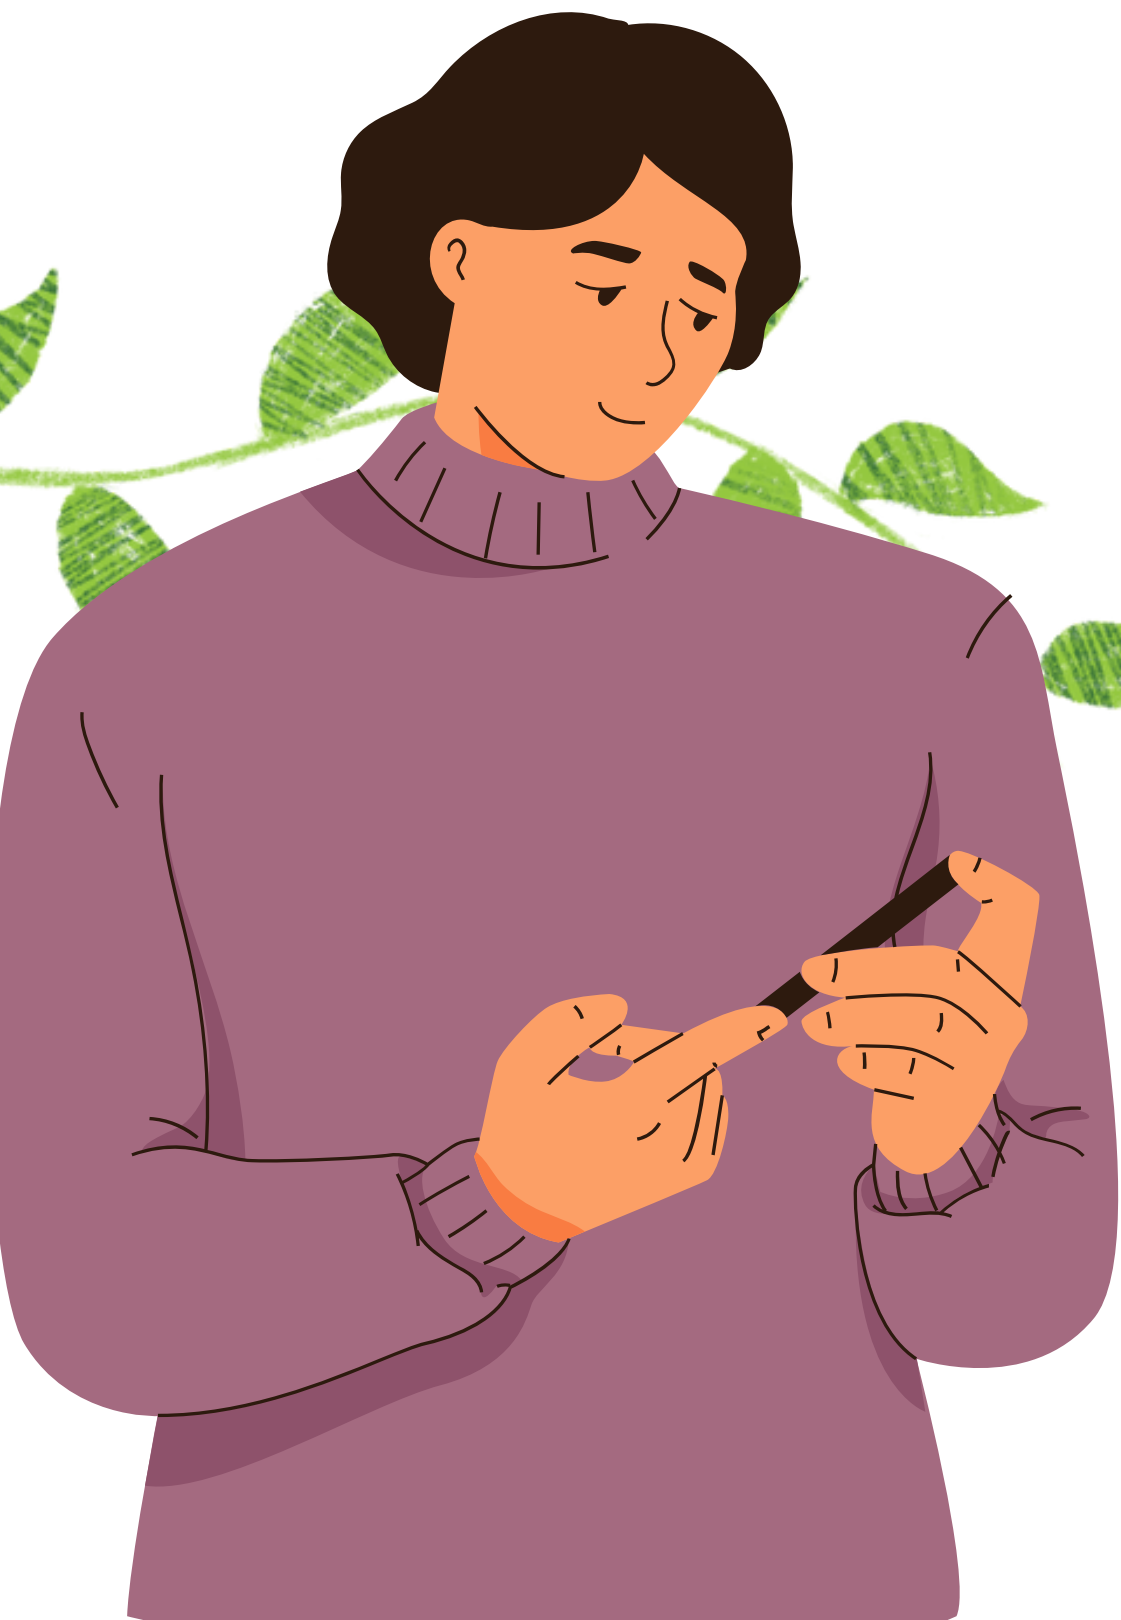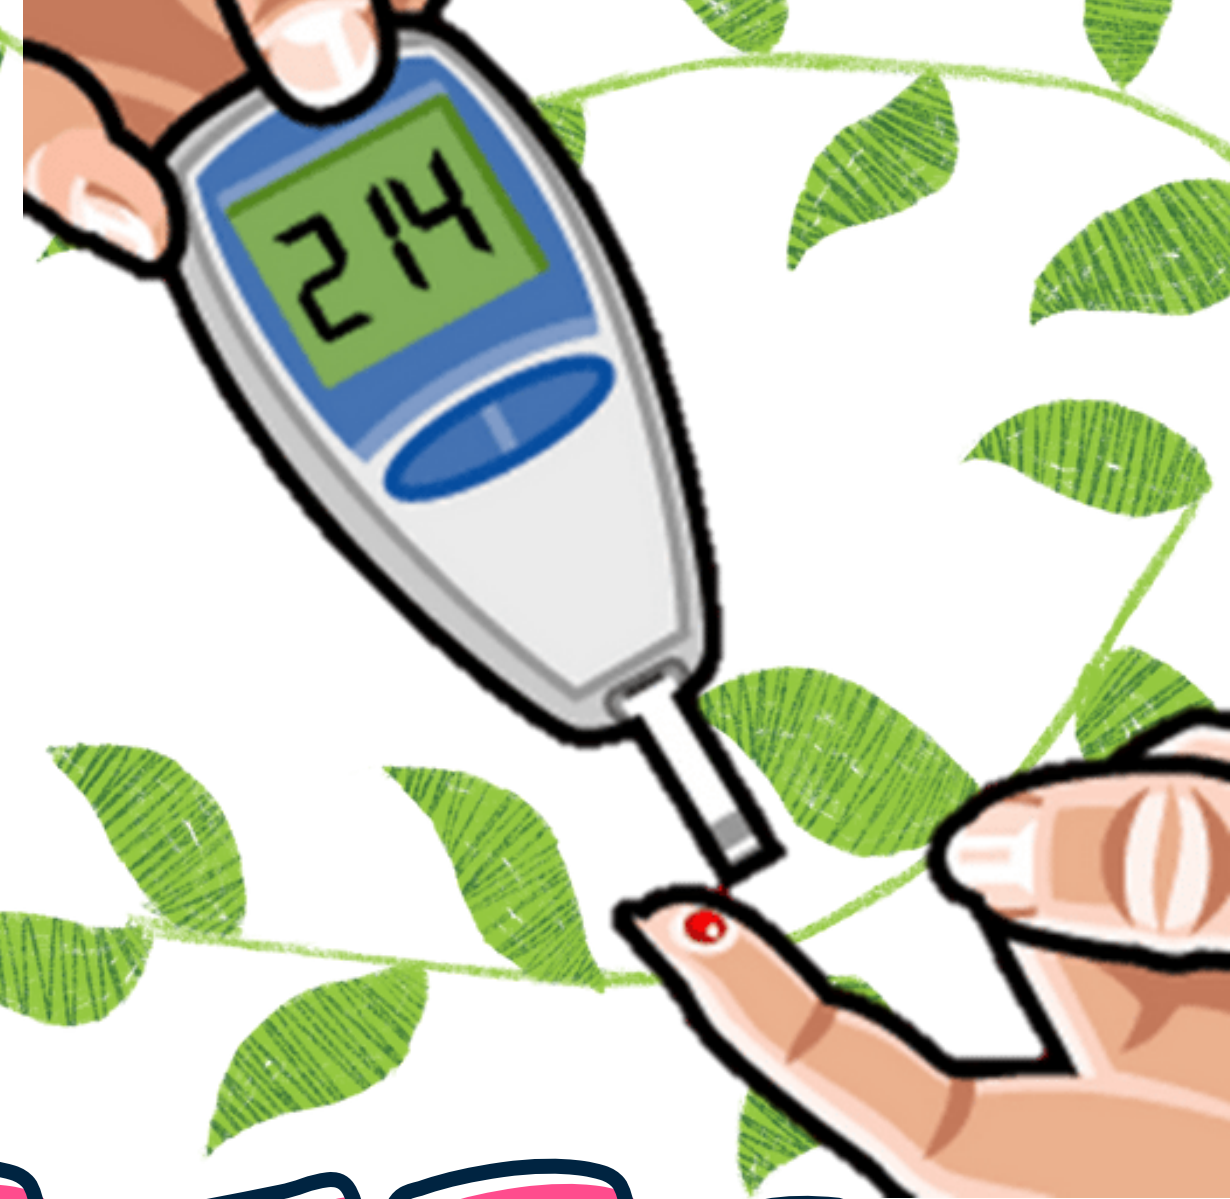

# DIABETES MELLITUS

## ¿QUÉ ES LA DIABETES?

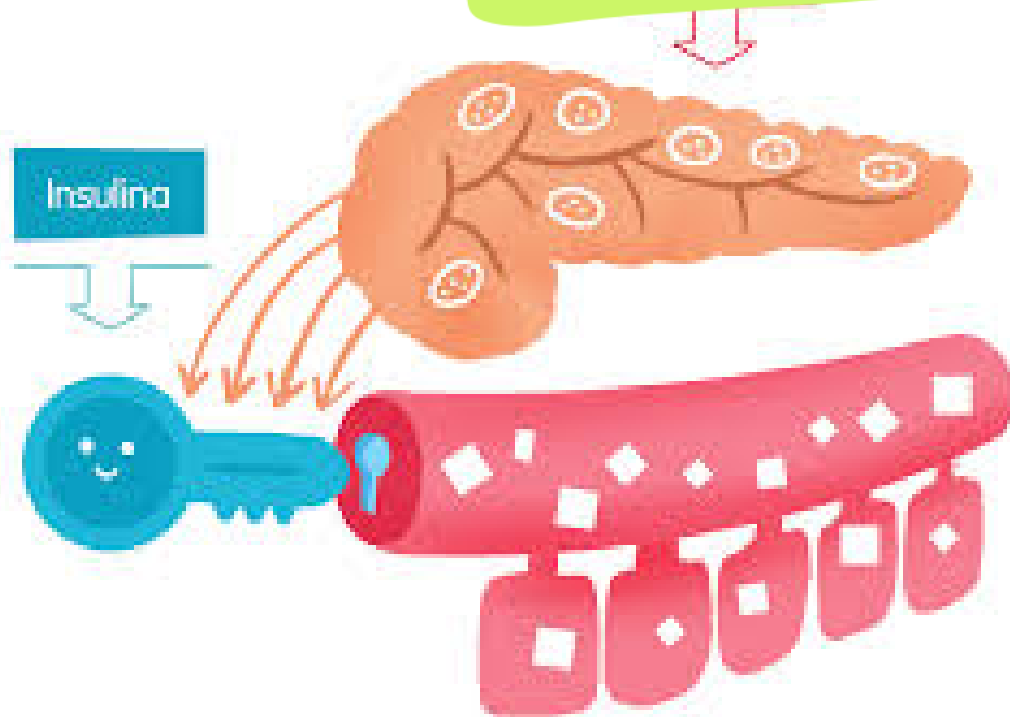

Es un grupo de enfermedades caracterizadas por concentraciones elevadas de glucosa en la sangre resultantes de un defecto en la secreción de insulina, en la acción de la insulina o de ambos.

### TIPOS

#### DIABETES TIPO 1:

Afección crónica en la que el páncreas produce poco o nada de insulina.

#### DIABETES TIPO 2:

Resistencia a la insulina y la disfunción de células beta (deficiencia de insulina)

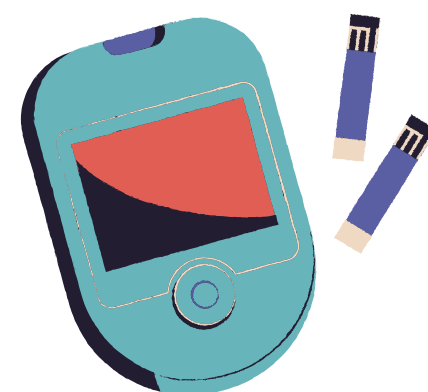

## VALORES BIOQUÍMICOS

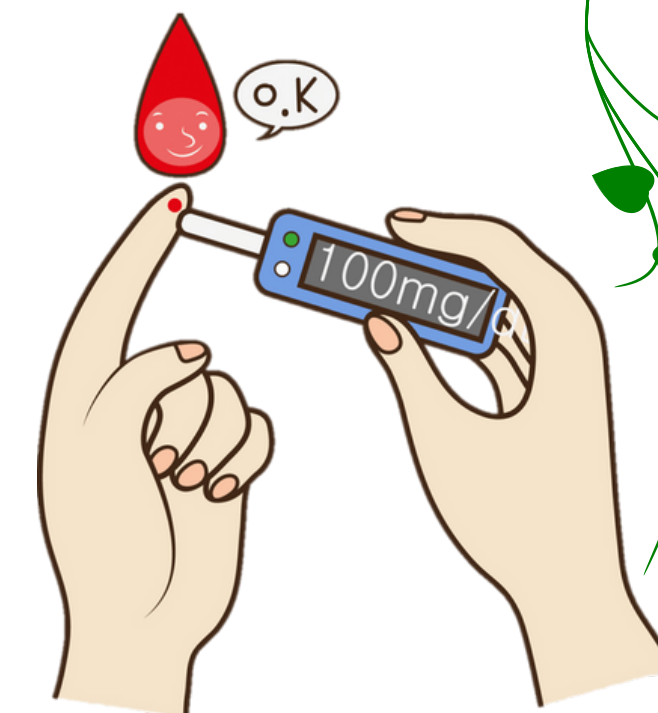

| Criterio                      | Rango normal   |
|-------------------------------|----------------|
| Glucosa plasmática en ayunas  | 70 a 100 mg/dl |
| Glucosa a 2 h                 | < 140 gg/dl    |
| Hemoglobina glucosilada (A1C) | 4 a 5.6%       |

## SIGNOS Y SÍNTOMAS

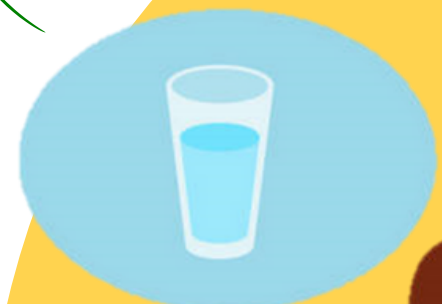

**Polidipsia  
(Mucha sed)**

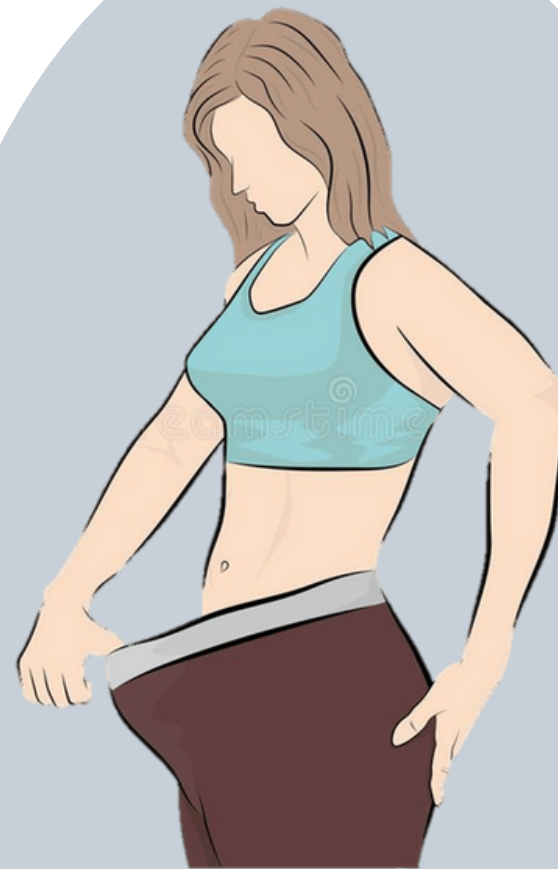

**Pérdida  
de peso**

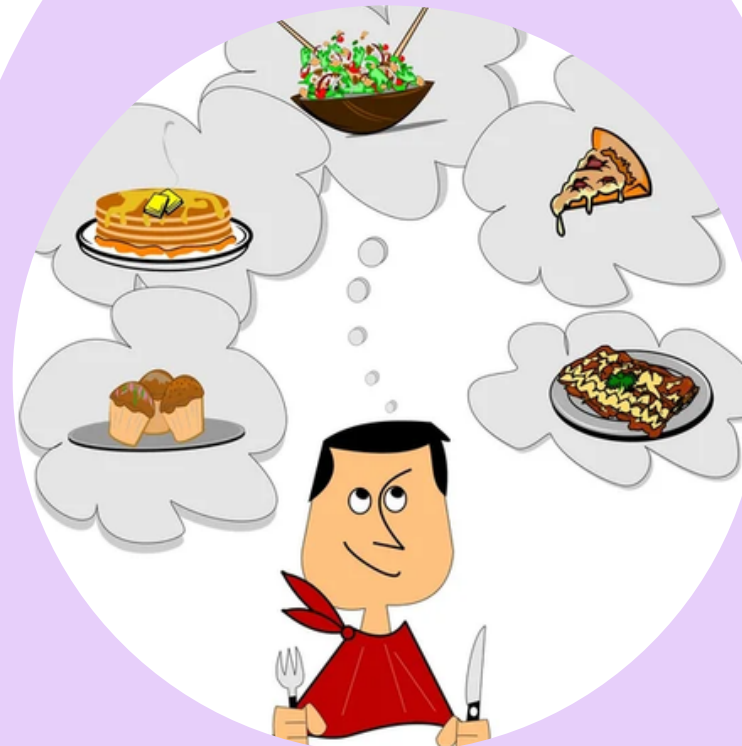

**Polifagia (Mucha  
hambre)**

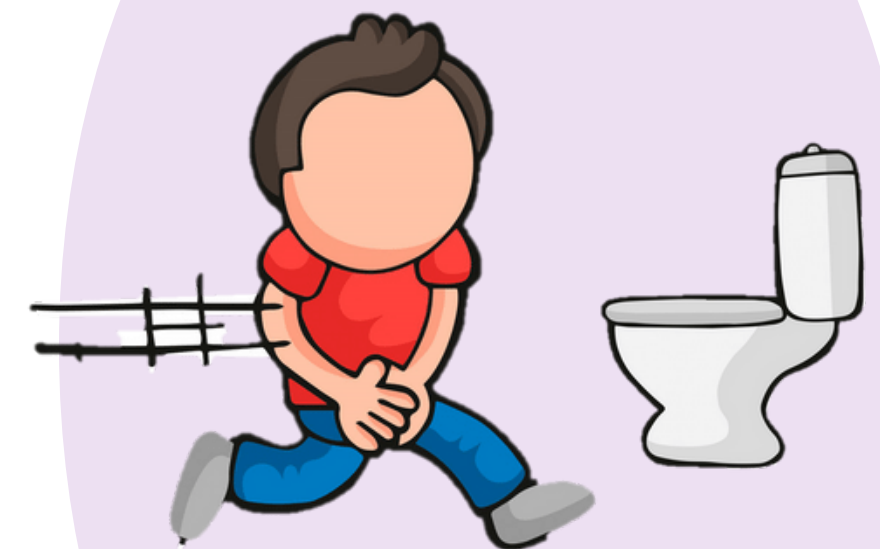

**Poliuria (Orina  
mucho)**

## COMPLICACIONES

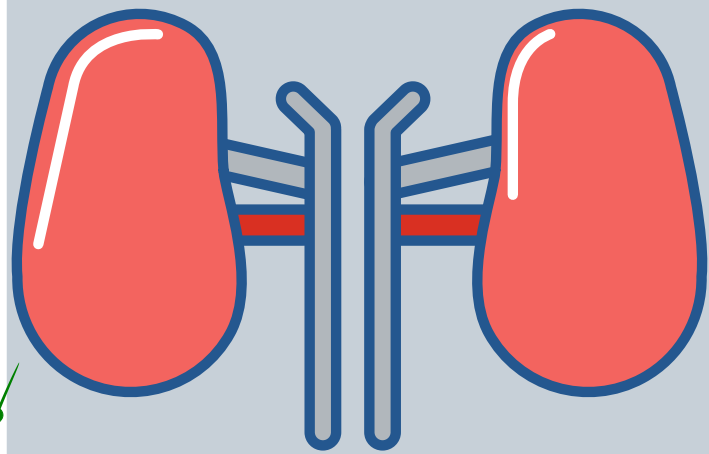

**Nefropatía o daño  
a los riñones**

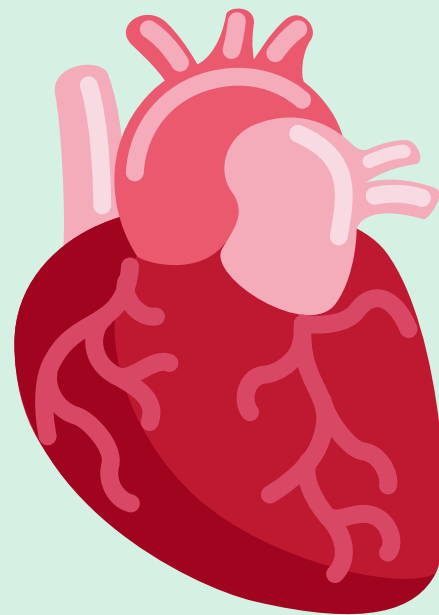

**Vesiculares  
y cardiacas**

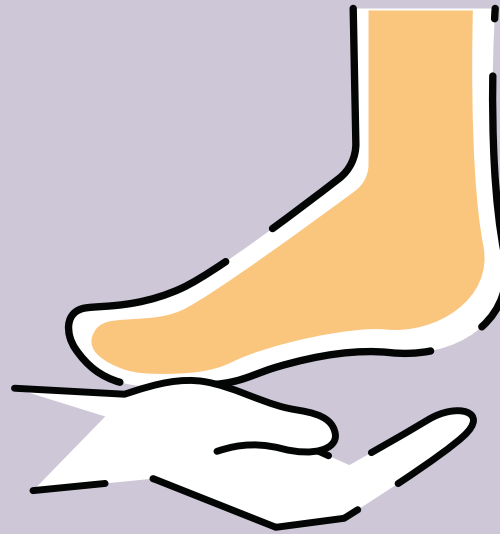

**Pie  
diabético**

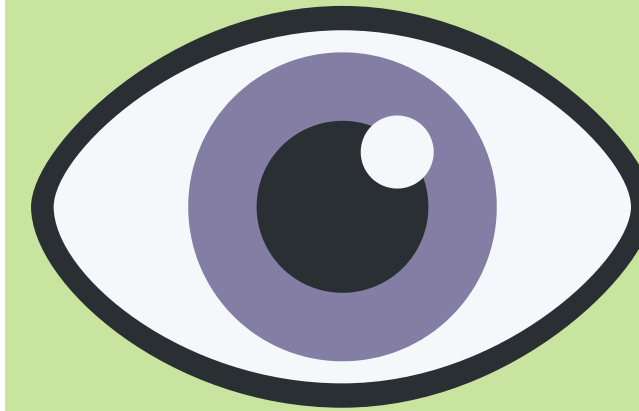

**Retinopatías  
diabéticas o daño  
a la retina del ojo**

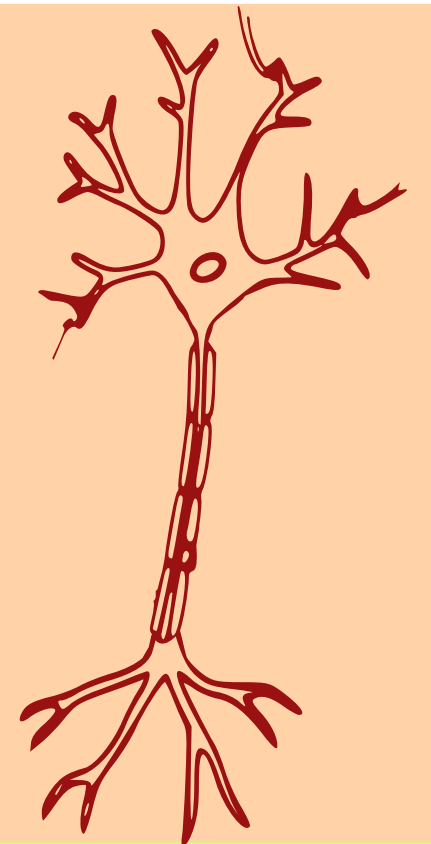

**Neuropatía  
diabética o daño  
a los nervios**

# ¿CÓMO CONTROLAR LA DIABETES MELLITUS?

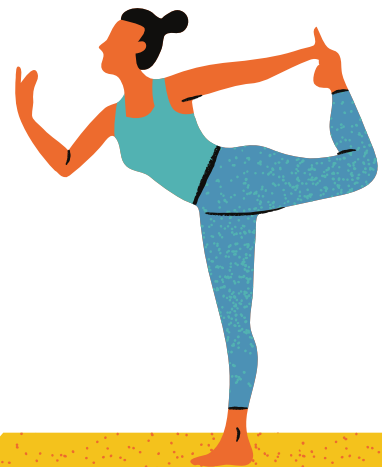

**Realice actividad física**

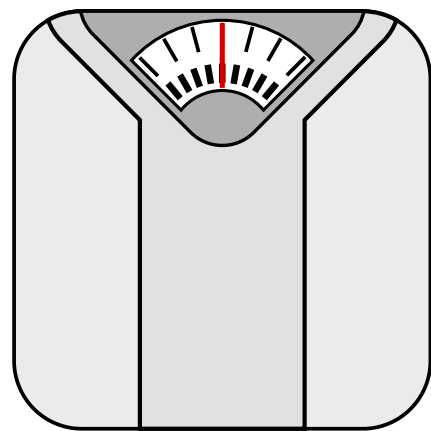

**Controle su peso**

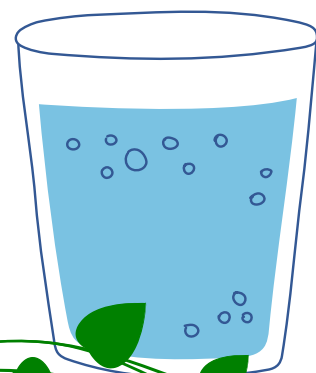

**Beba 8 vasos de agua**

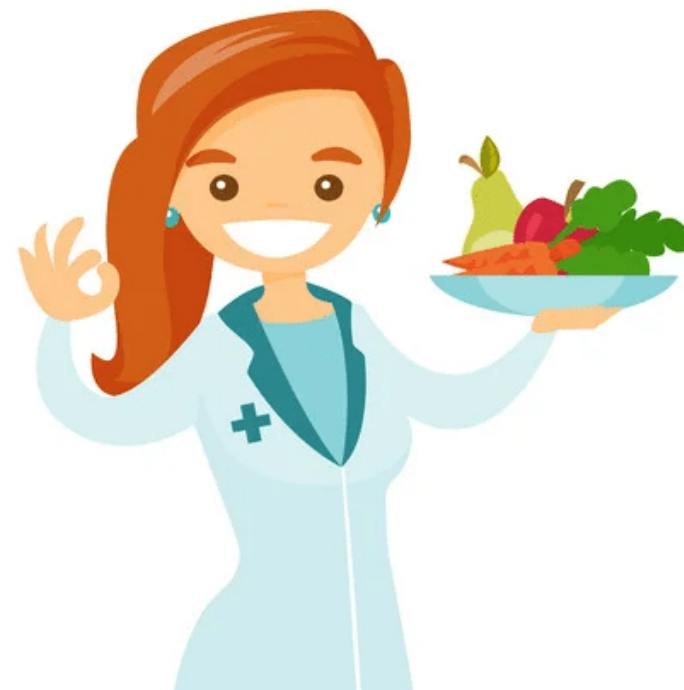

**Acuda al nutricionista**

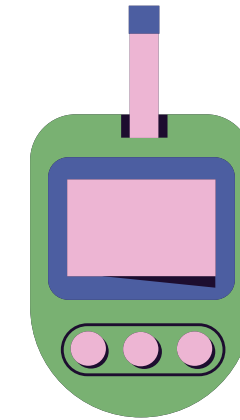

**Realice controles de glicemia frecuentemente**

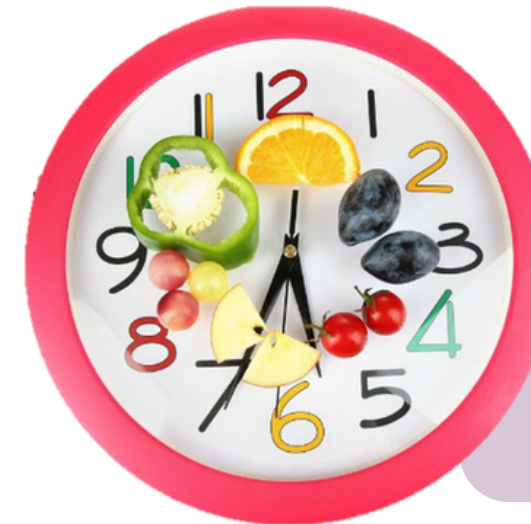

**Establezca sus horarios al alimentarse**

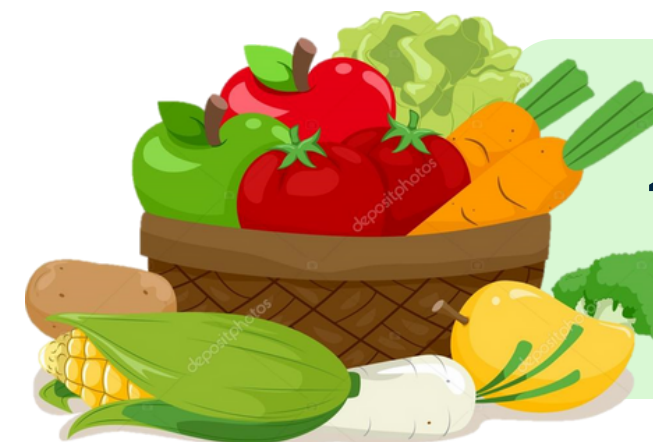

**Consuma verduras y frutas con bajo contenido de carbohidratos**

## **ACCIONES NO PERMITIDOS**

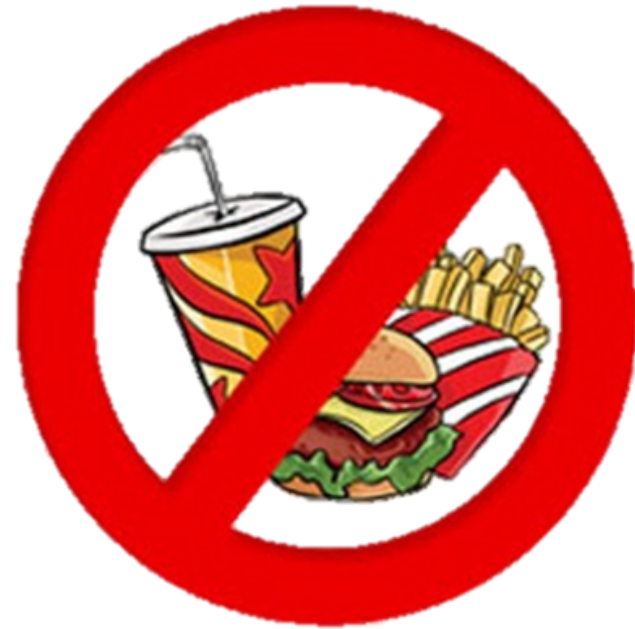

**No consuma frituras  
ni grasas**

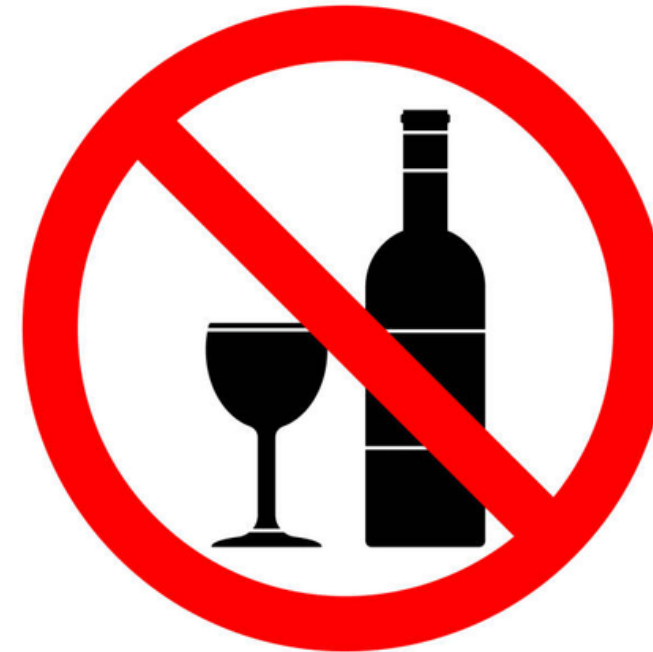

**No beba alcohol**

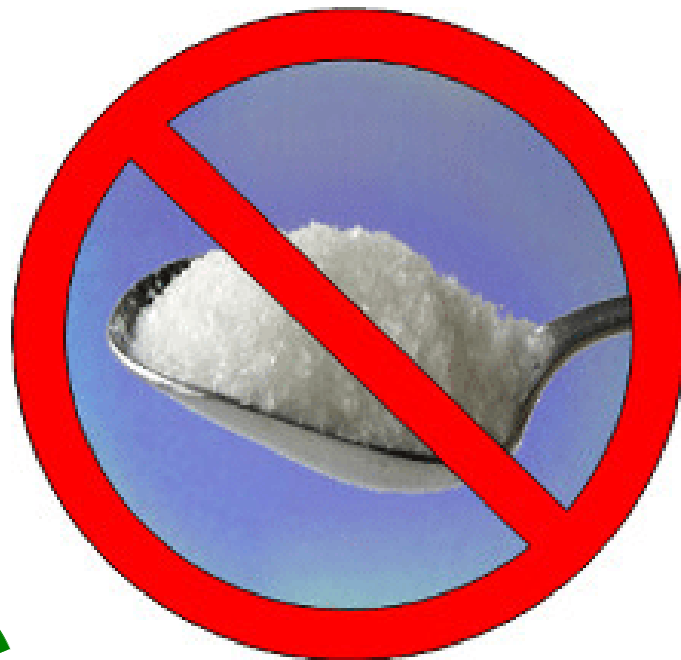

**Evite el consumo de  
azúcar y productos  
azucarados**

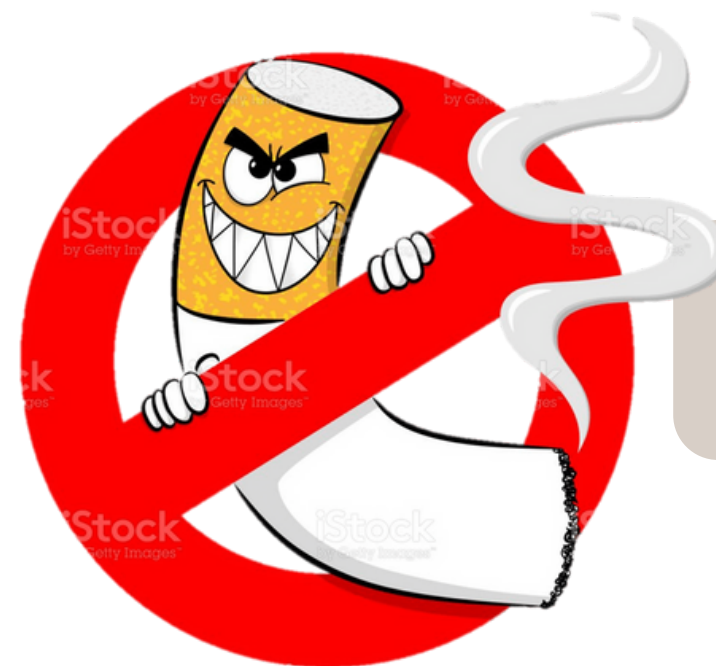

**No fume**

# HIPERTENSIÓN ARTERIAL

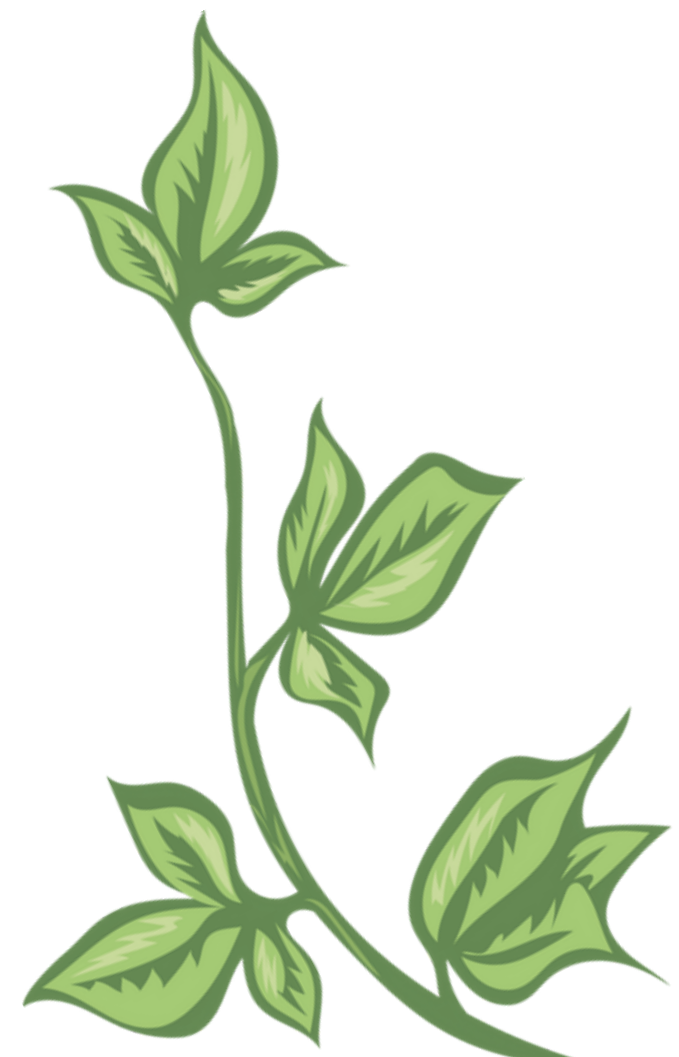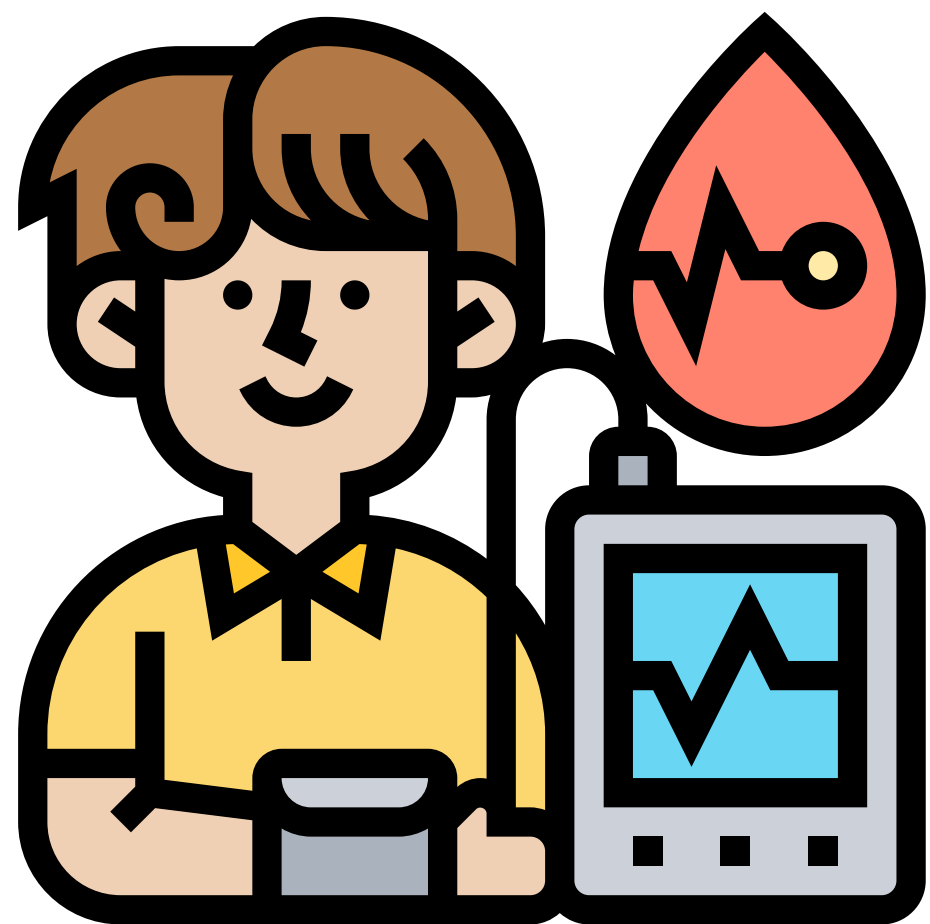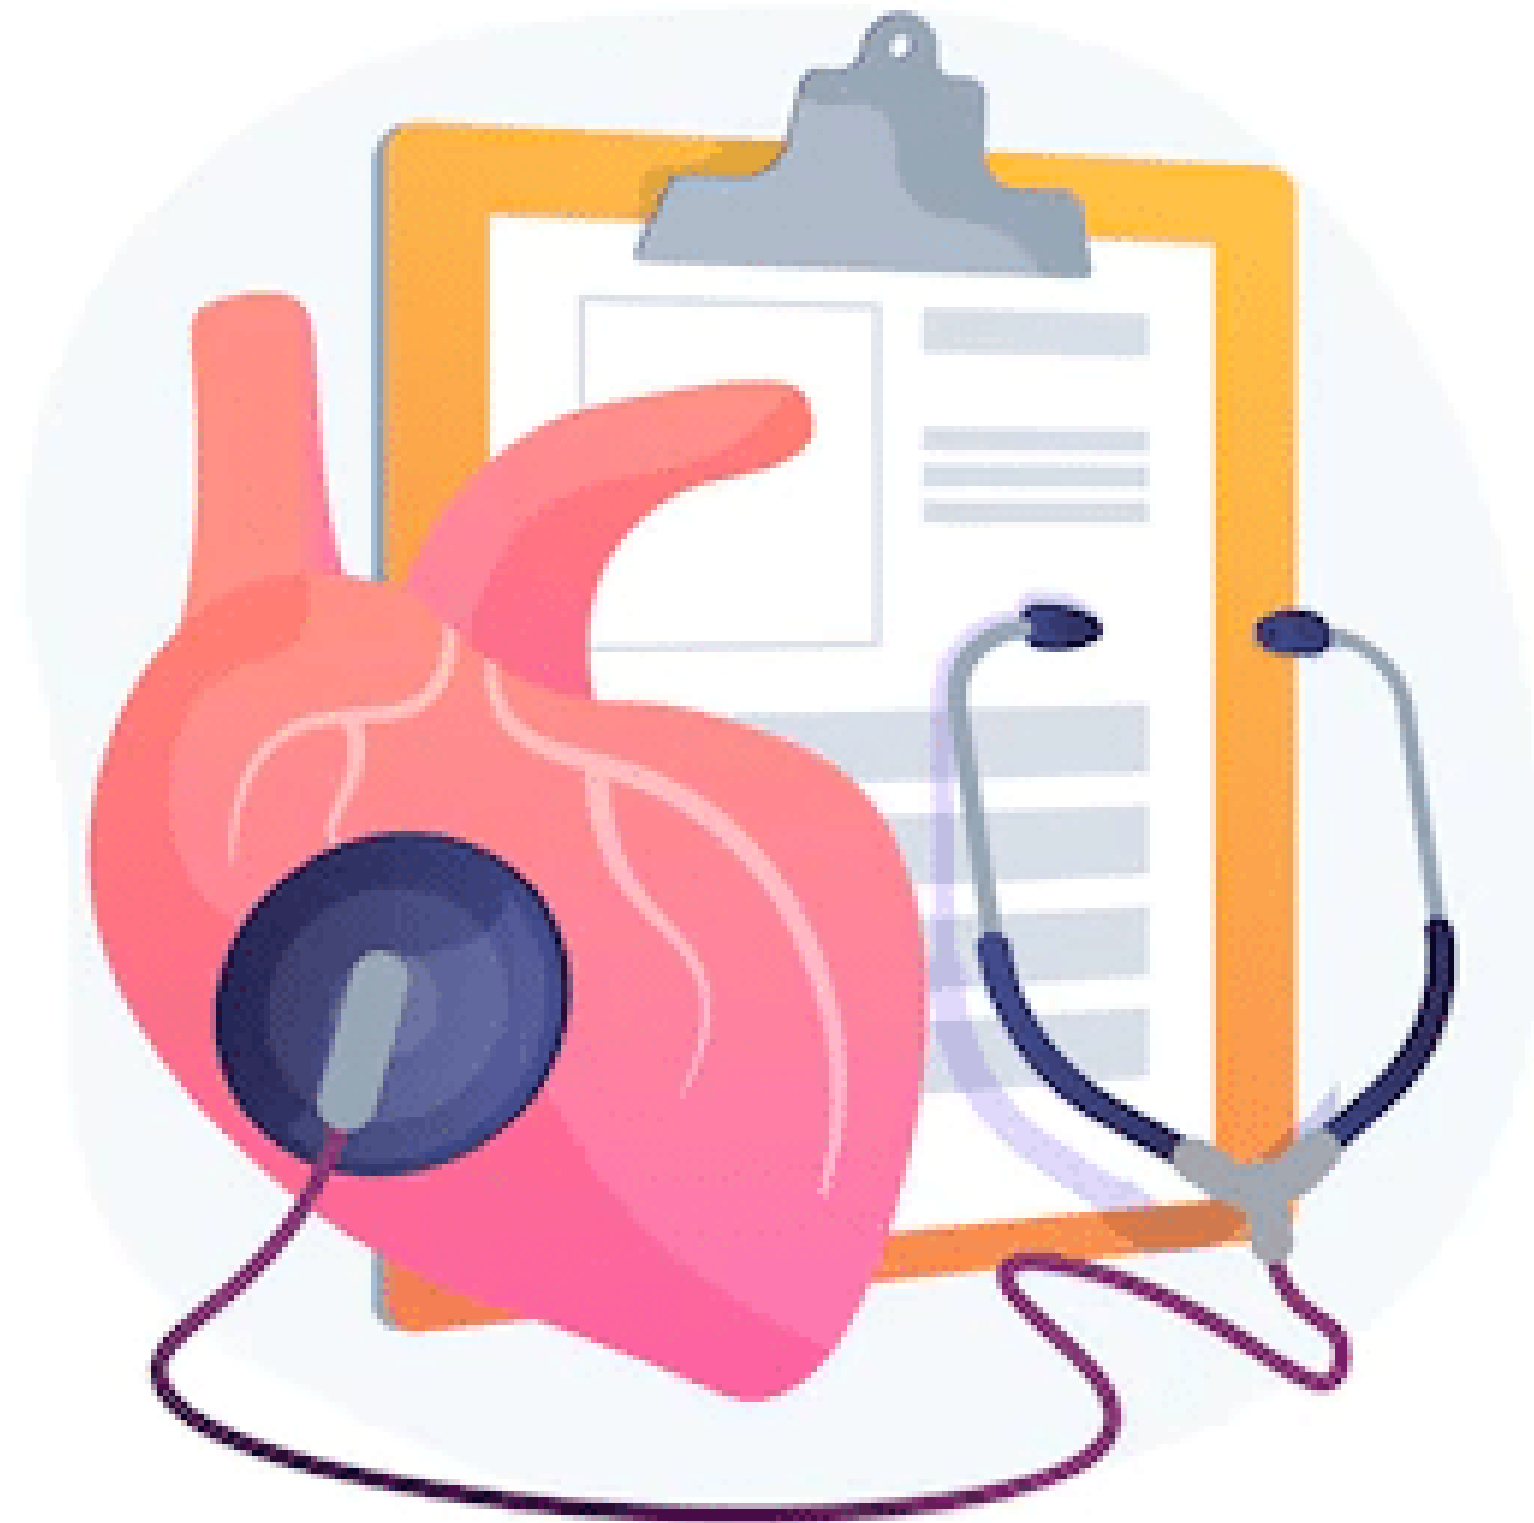

# ¿QUÉ ES LA HIPERTENSIÓN?

Es el aumento persistente de la presión arterial, la fuerza ejercida por unidad de superficie sobre las paredes de las arterias.

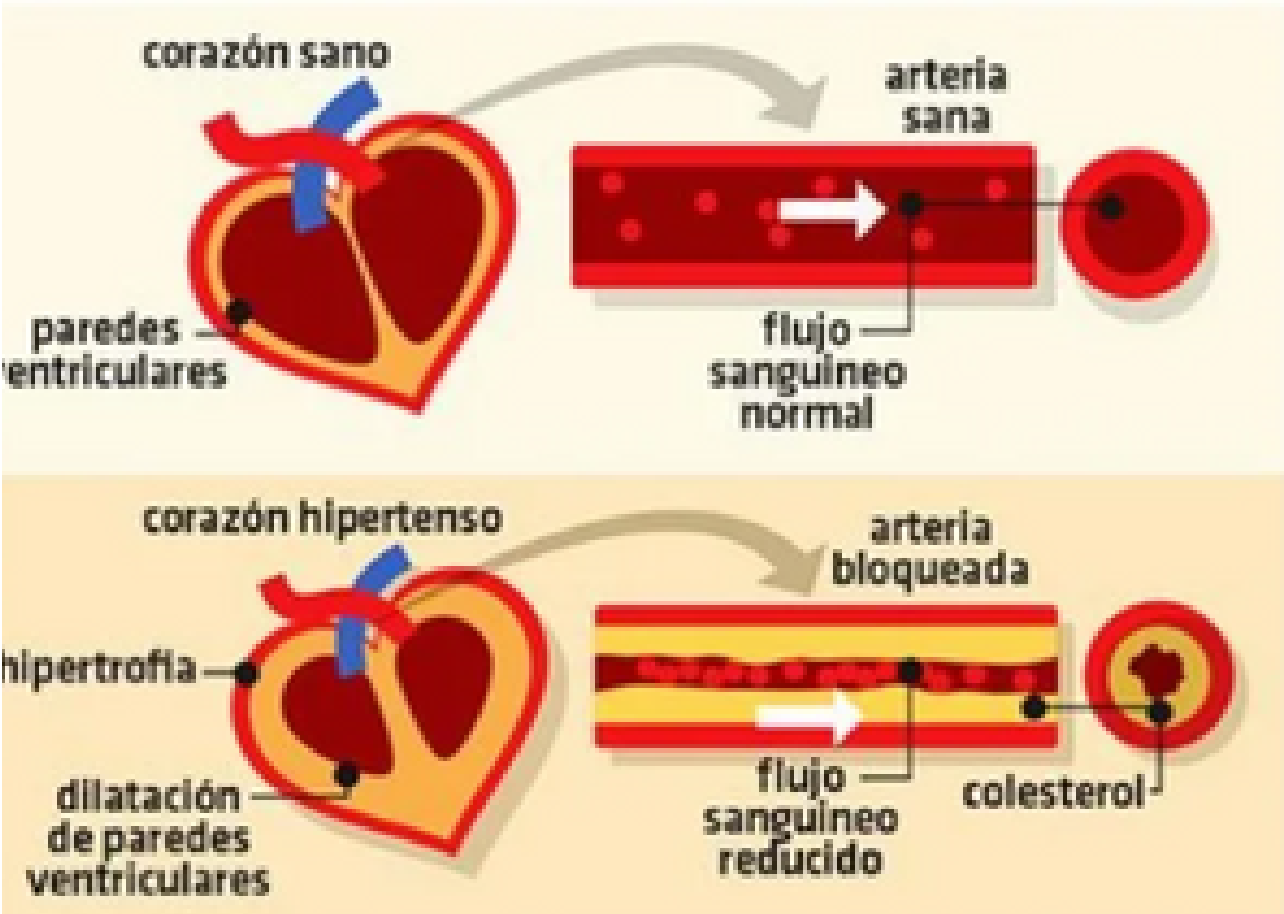

## PRESIÓN ARTERIAL

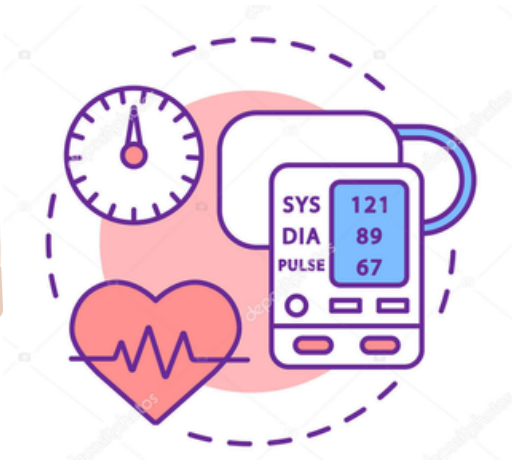

| Categoría     | PAS            | PAD          |
|---------------|----------------|--------------|
| Nivel óptimo  | <120 mmHg      | <80 mmHg     |
| Normal        | 120 a 129 mmHg | 80 a 84 mmHg |
| Prehipertenso | 130 a 139 mmHg | 85 a 89 mmHg |
| Prehipertenso | 130 a 139 mmHg | >=90 mmHg    |

**PRESIÓN ARTERIAL SISTÓLICA (PAS):**  
es la fuerza que se ejerce sobre las paredes de los vasos sanguíneos a medida que el corazón se contrae e impulsa la sangre a través de sus cámaras.

**PRESIÓN ARTERIAL DIASTÓLICA (PAD)**  
Mide la fuerza mientras el corazón se relaja entre las contracciones.

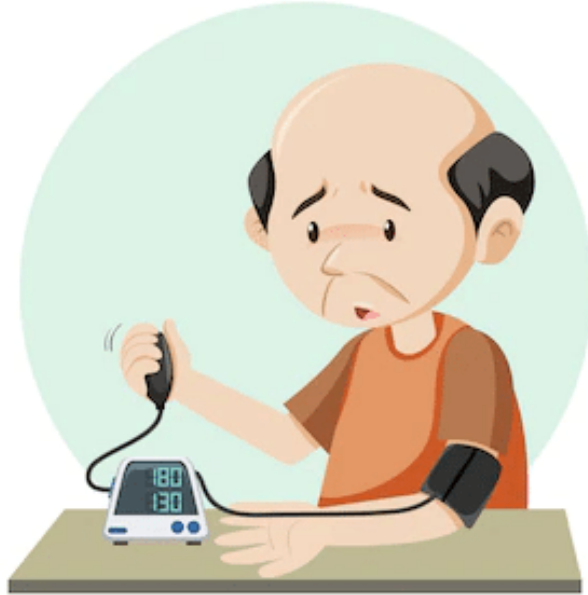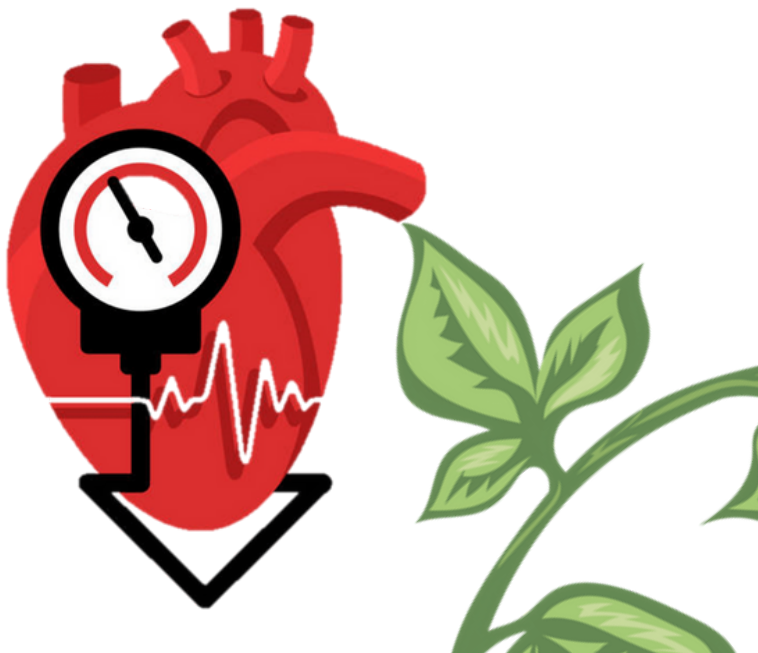

## SIGNOS Y SÍNTOMAS

**Dolor de  
cabeza**

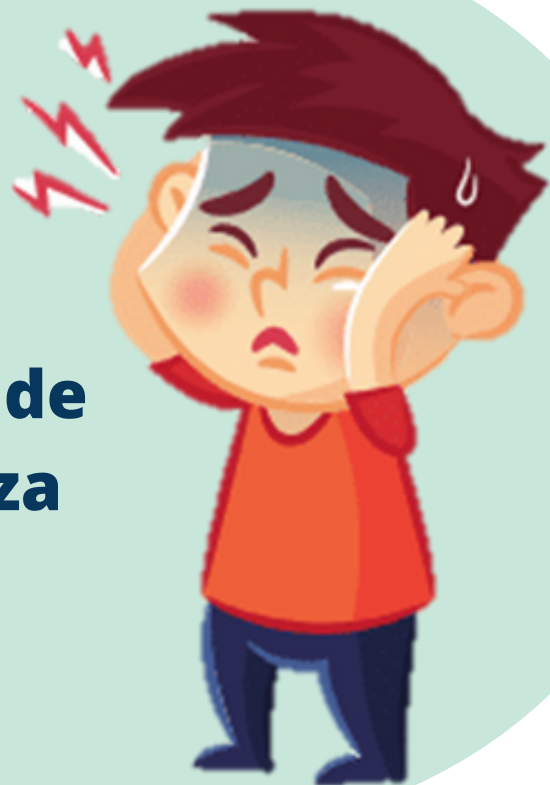

**Confusión**

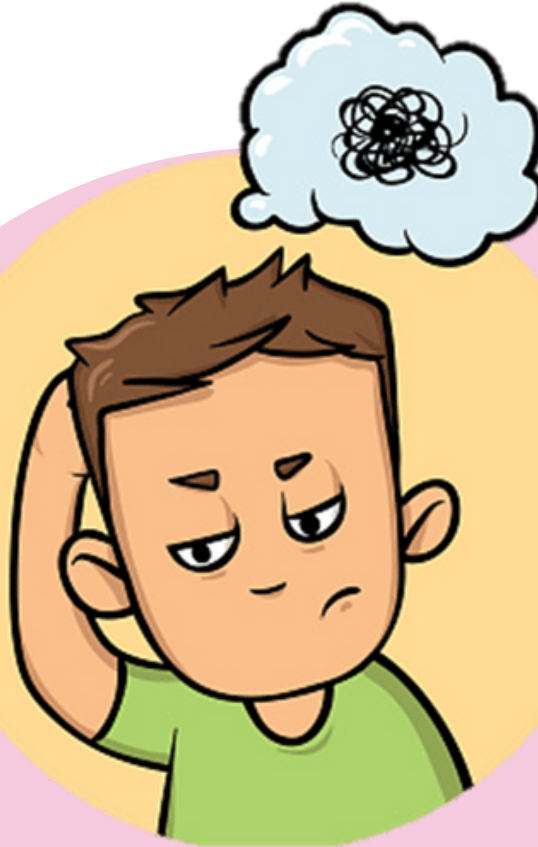

**Náuseas o  
vómitos**

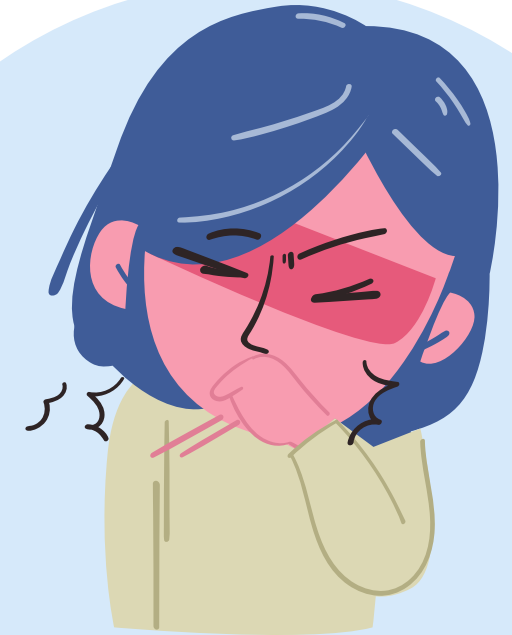

**Zumbido o ruido  
en el oído**

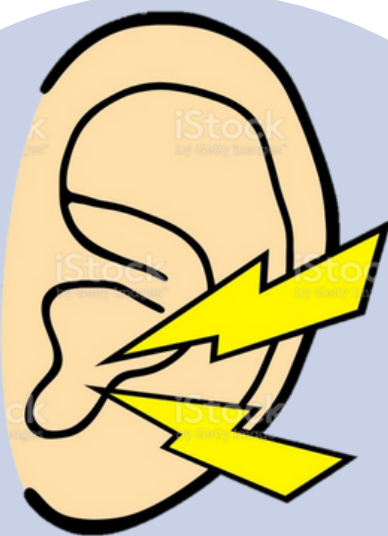

**Fatiga o cansancio**

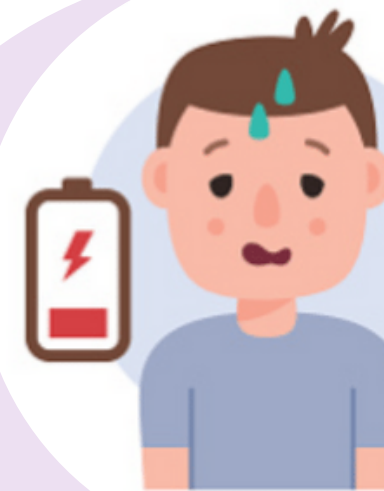

## COMPLICACIONES

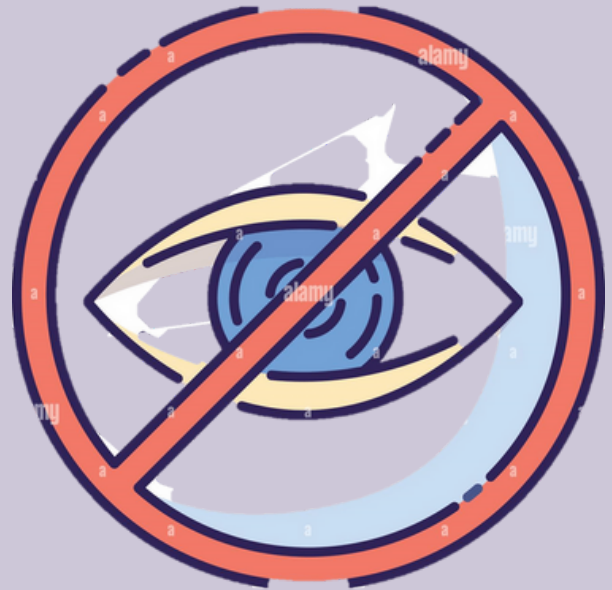

**Pérdida de  
visión**

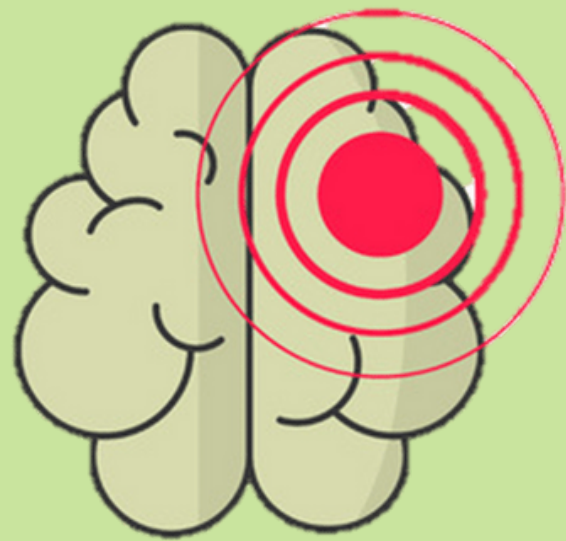

**Derrame  
cerebral**

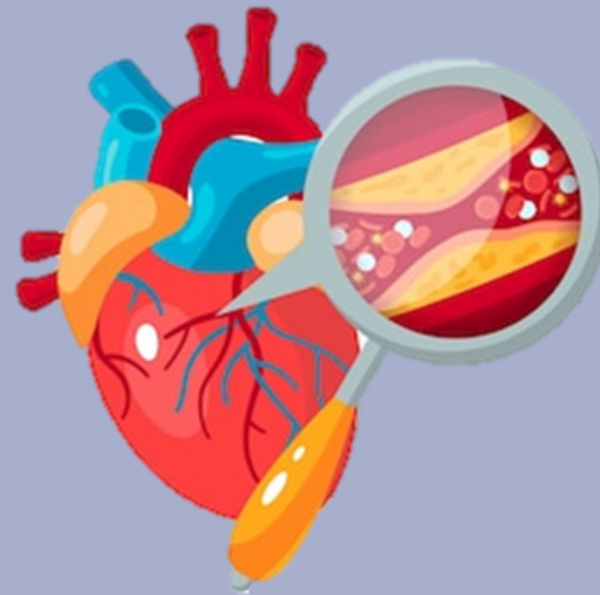

**Aterosclerosis**

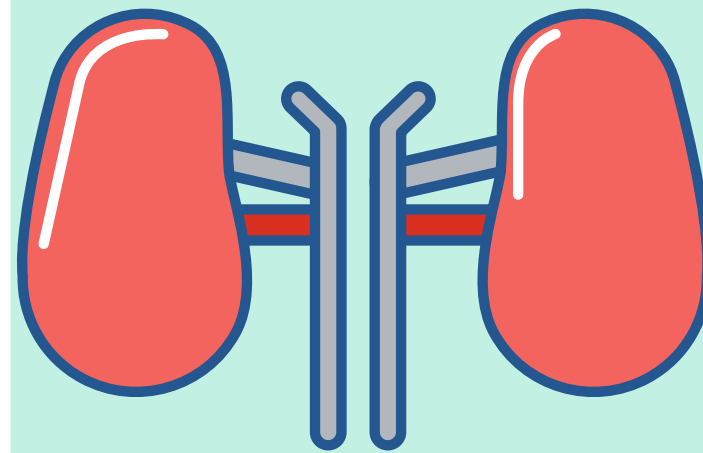

**Insuficiencia  
renal**

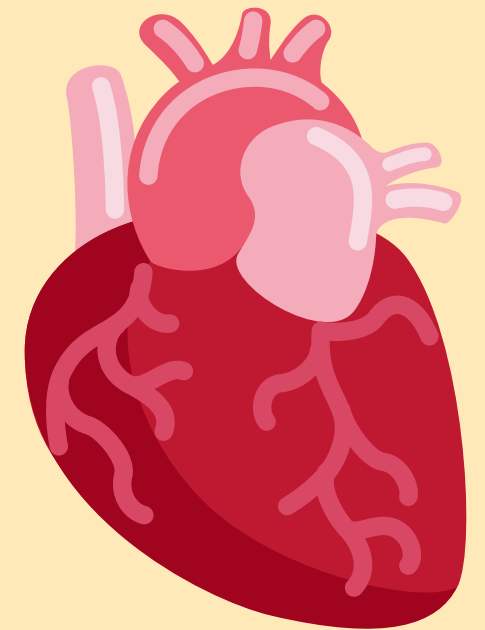

**Infarto de  
miocardio**

# ¿CÓMO CONTROLAR LA HIPERTENSIÓN ARTERIAL?



**Realice actividad física**



**Controle su peso**

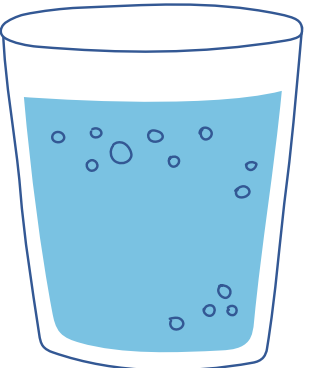

**Beba 8 vasos de agua**



**Acuda al nutricionista**



**Realice controles de presión arterial**



**Establezca sus horarios al alimentarse**



**Mantenga una alimentación saludable, consuma entre 5 frutas y verduras**

## **ACCIONES NO PERMITIDOS**

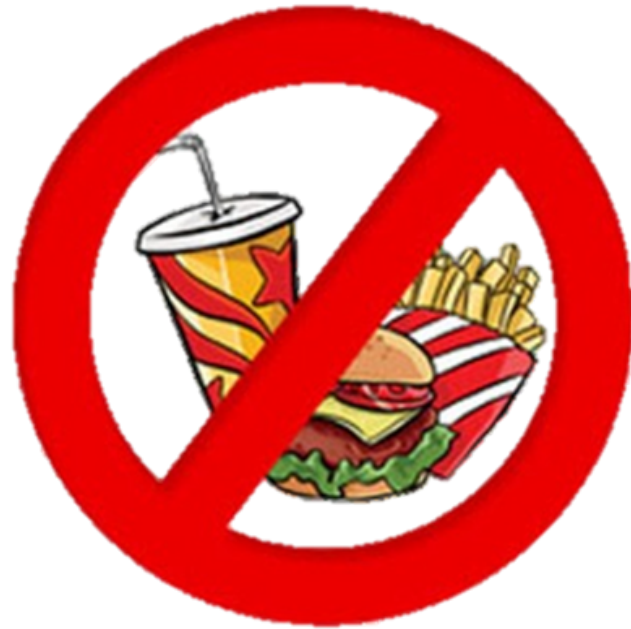

**No consuma frituras  
ni grasas**

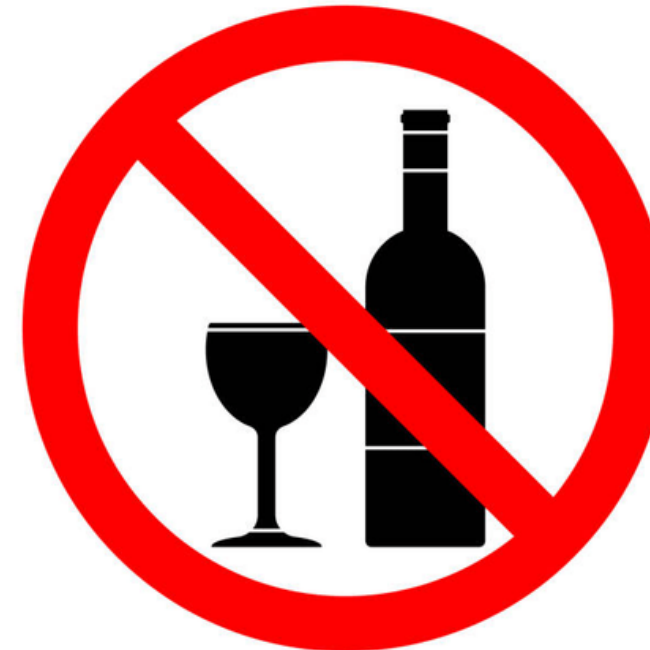

**No beba alcohol**

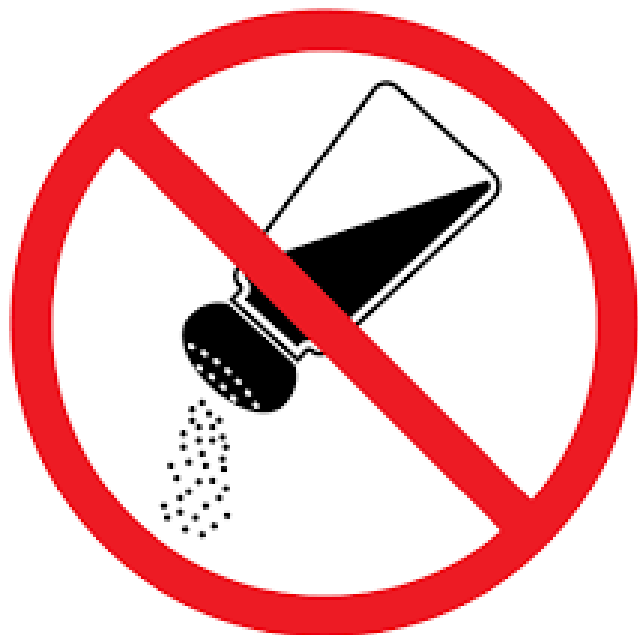

**No añada sal a las  
comidas**

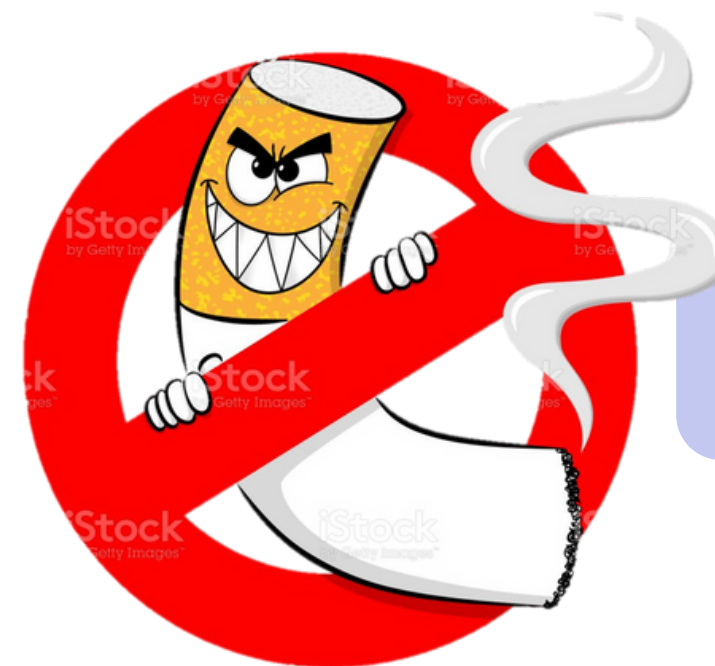

**No fume**

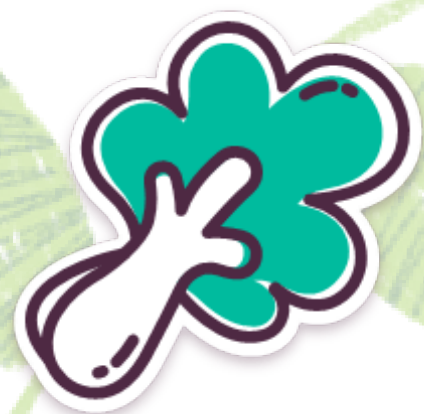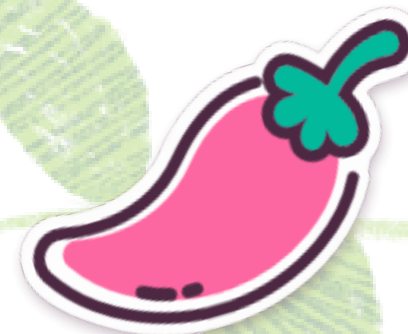

# Buenas prácticas de Manipulación

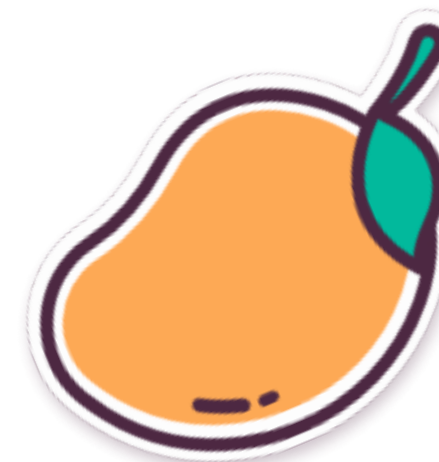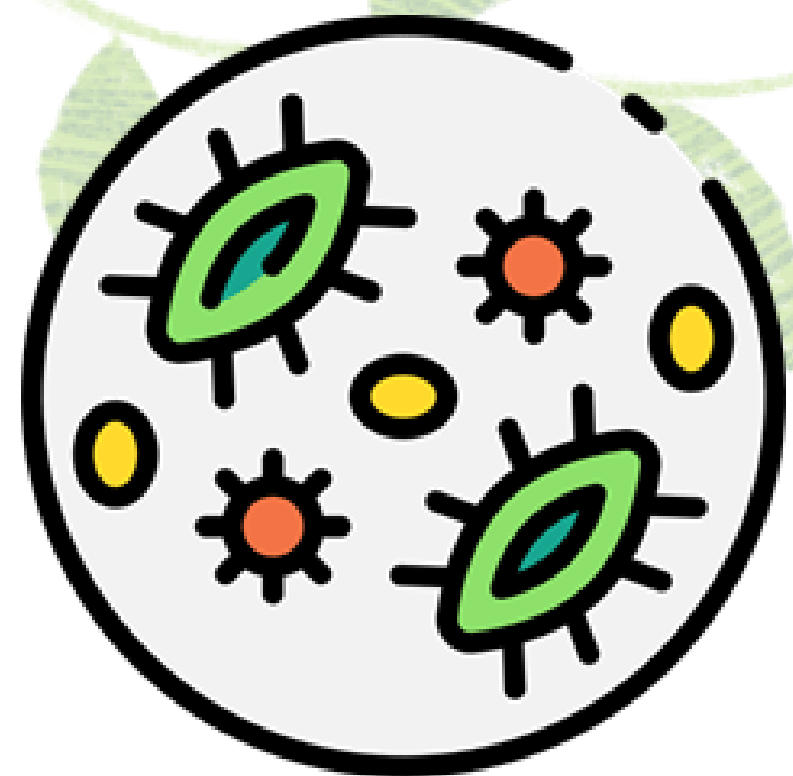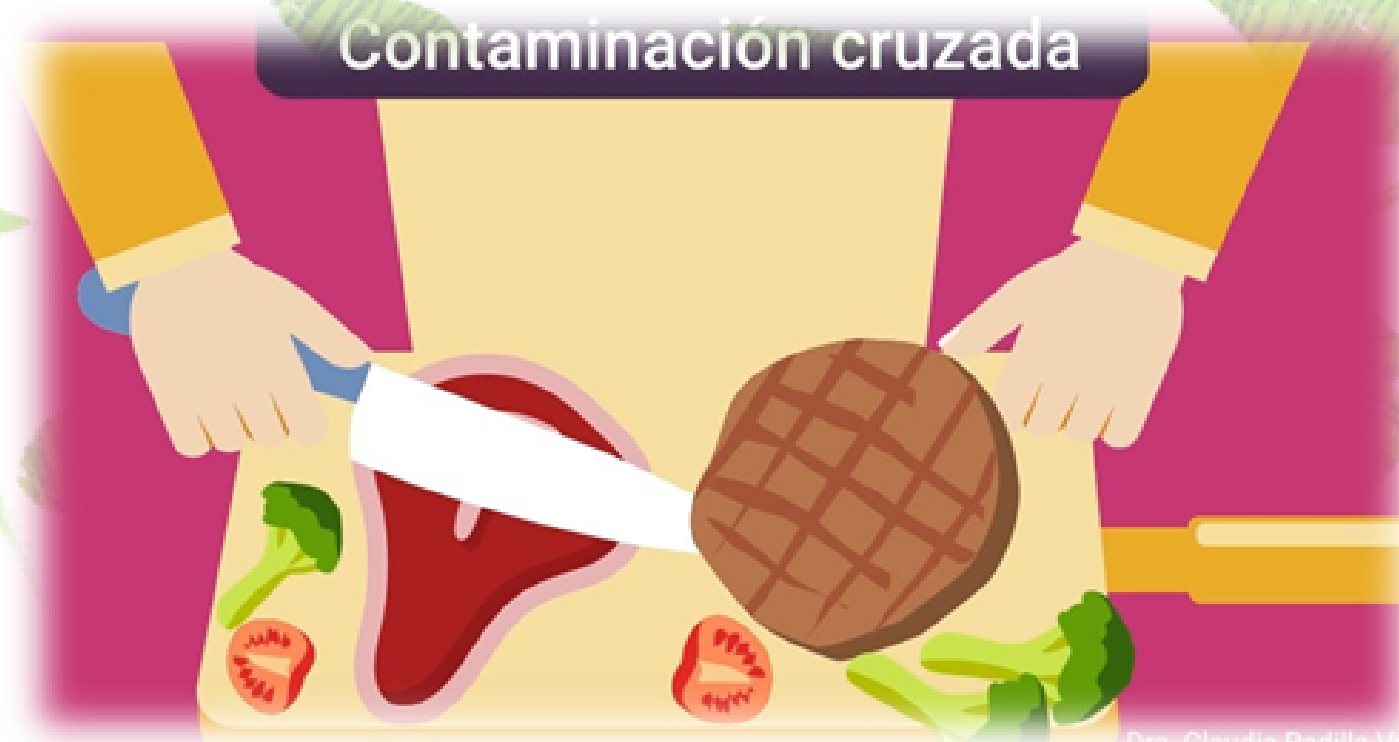

## ¿QUÉ ES HIGIENE ALIMENTARIA?

Es el conjunto de prácticas antes, durante y después de la preparación de alimentos que nos ayudan a prevenir enfermedades

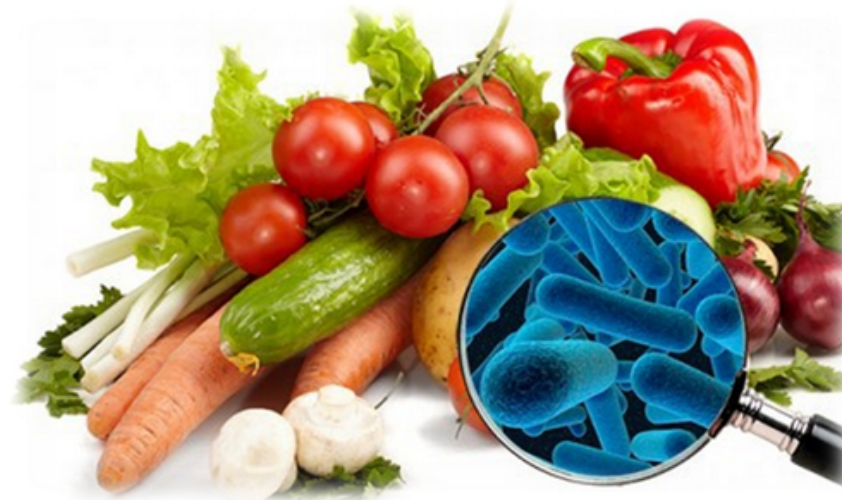

## ¿Qué es contaminación cruzada?

Es el paso de un peligro presente en un alimento a otro que se encontraba inocuo, utilizando como vehículo superficies o utensilios que han estado en contacto con ambos alimentos sin la debida limpieza y desinfección requerida

## ¿Cuáles son los síntomas de las enfermedades de transmisión alimentaria?

La sintomatología de una enfermedad varía al incorporar distintas variables

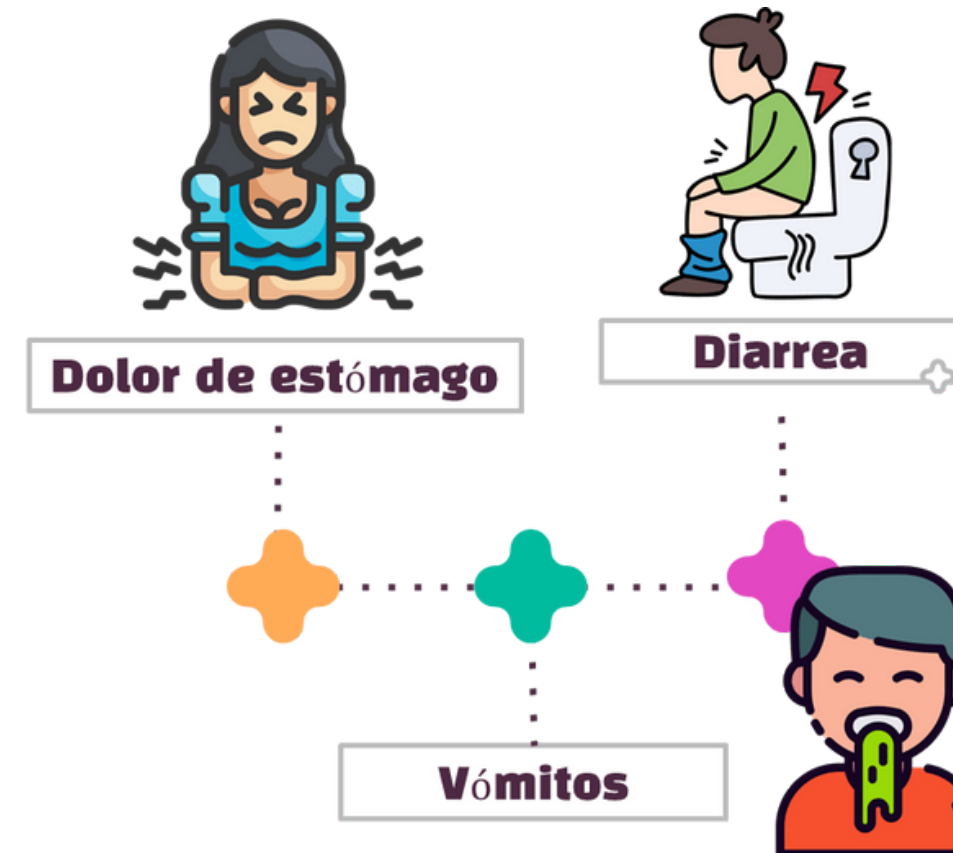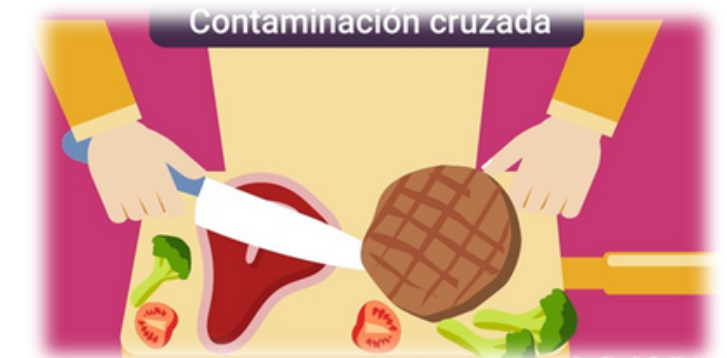

# Tipos de alimentación cruzada

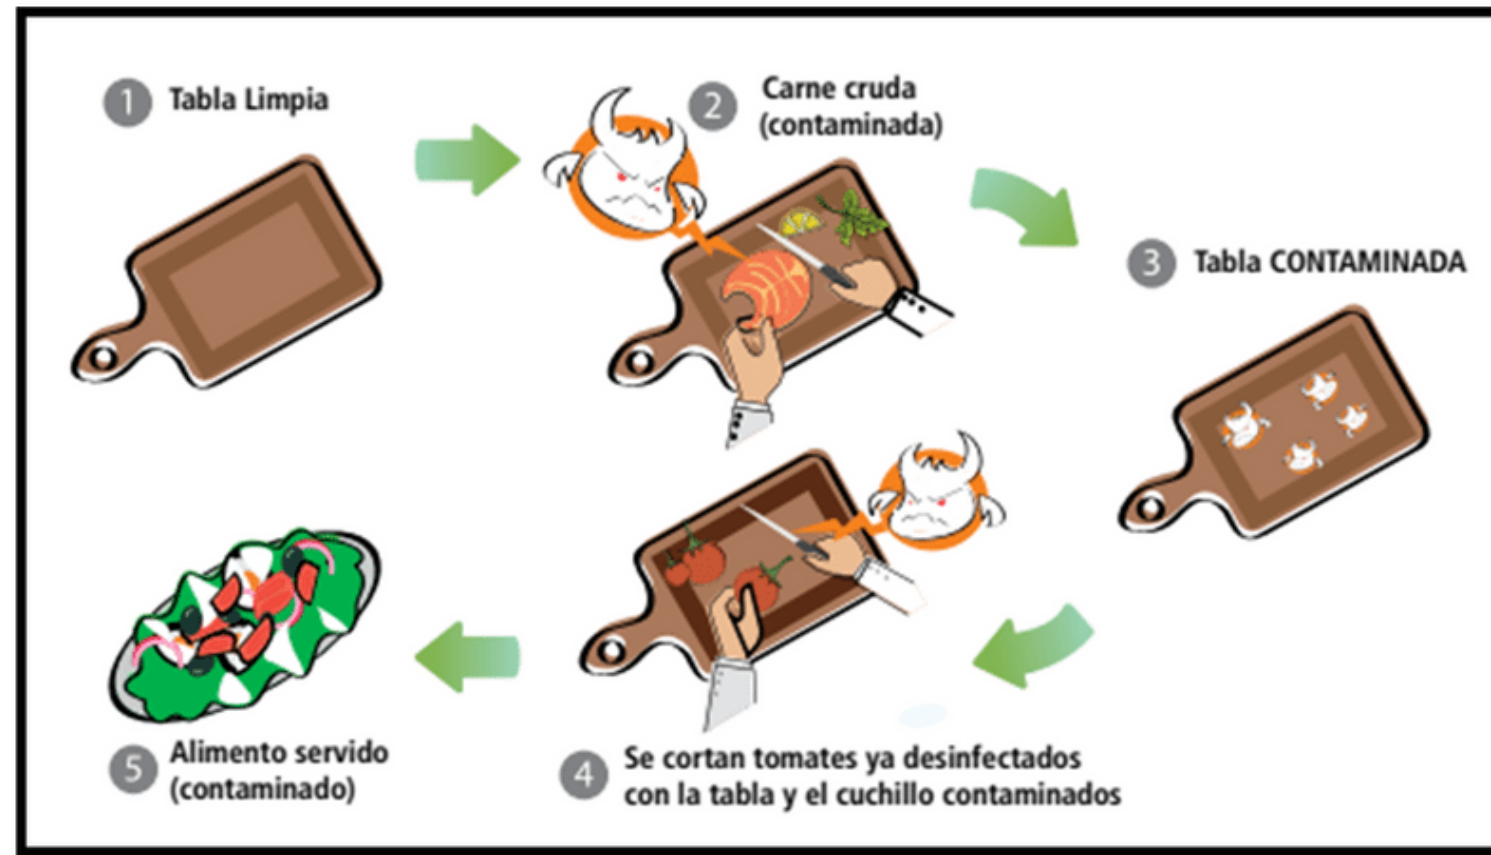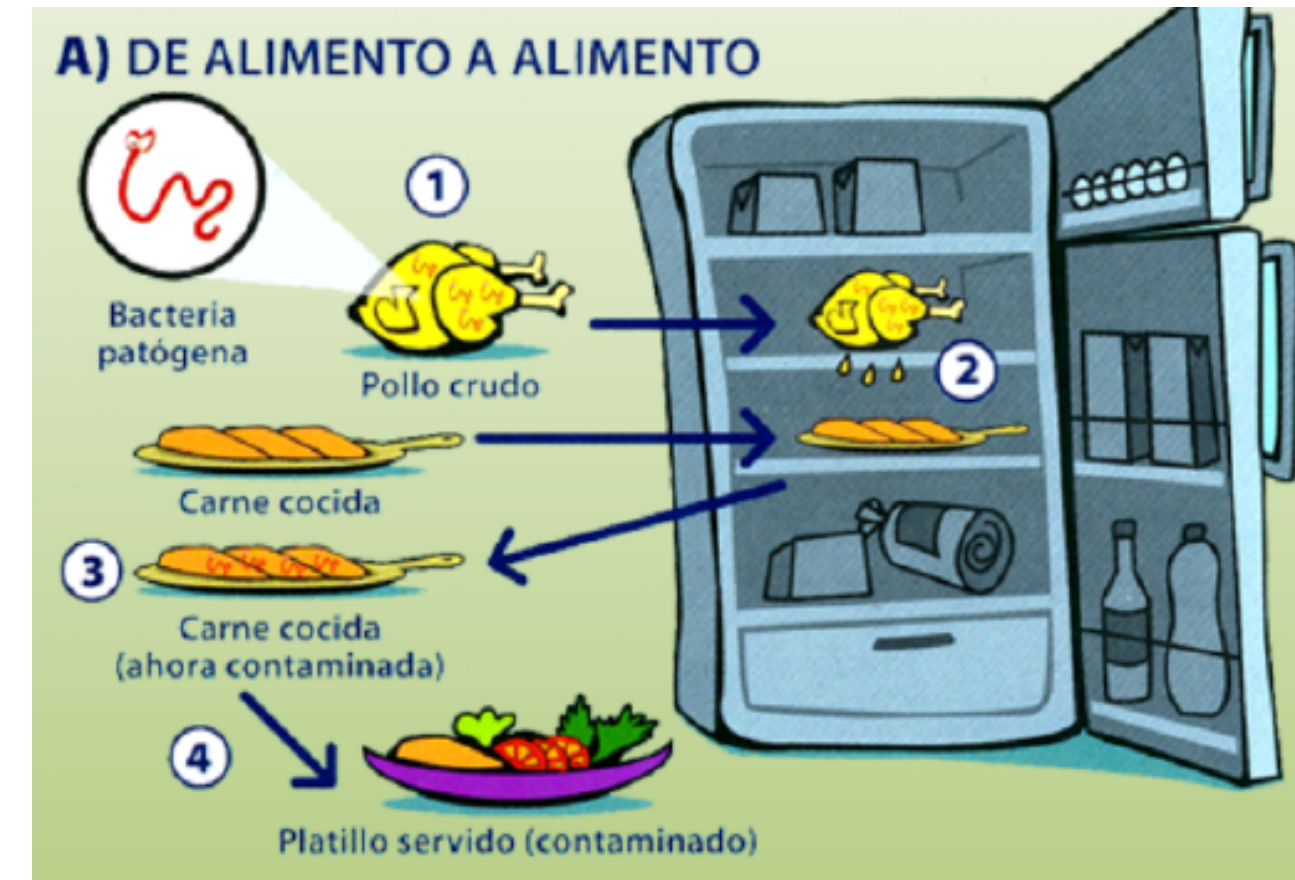

**INSIRECTA**

Alimento

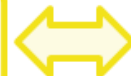

Superficie

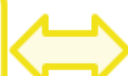

Alimento

**DIRECTA**

Alimento

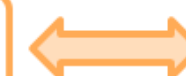

Alimento

**¿Qué son las ETAS?**

Las enfermedades de transmisión alimentaria (ETA) son aquellas enfermedades de carácter infeccioso o tóxico

Causado por:

Agente biológico

Agente químico

Agente físicos

# IMPIDE QUE LOS MICROORGANISMO LE INFECTEN CUMPLIENDO LAS 5 CLAVES PARA LA HIGIENE DE LOS ALIMENTOS:

## CLAVE N°1

### MANTENGA LA LIMPIEZA

- Lávese las manos antes de preparar alimentos y con frecuencia durante su preparación.
- Lávese las manos después de ir al baño.
- Lave las superficies y equipos usados en la preparación de alimentos.
- Proteja los alimentos y áreas de cocina de insectos, mascotas y de otros animales.

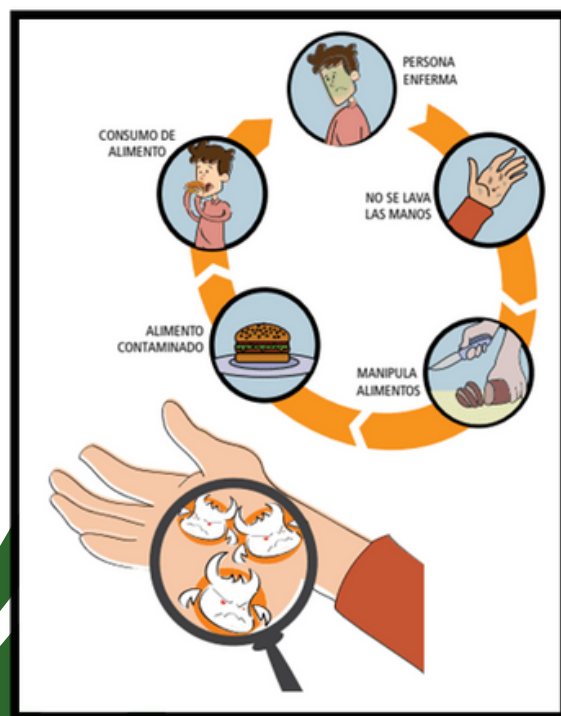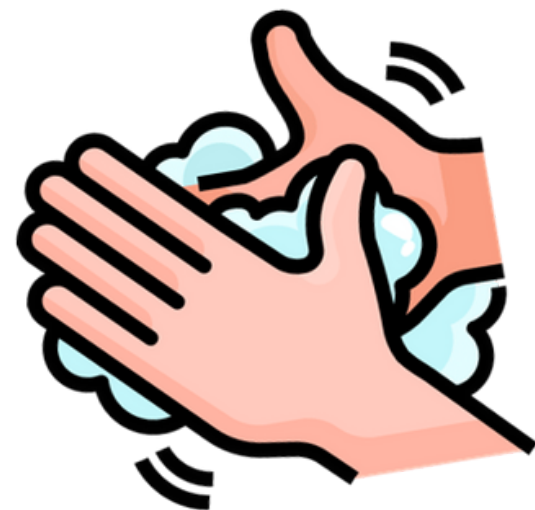

## CLAVE N°2

### SEPRE LOS ALIMENTOS CRUDOS DE COCIDOS

Separe siempre los alimentos crudos de los cocinados y de los listos para comer.

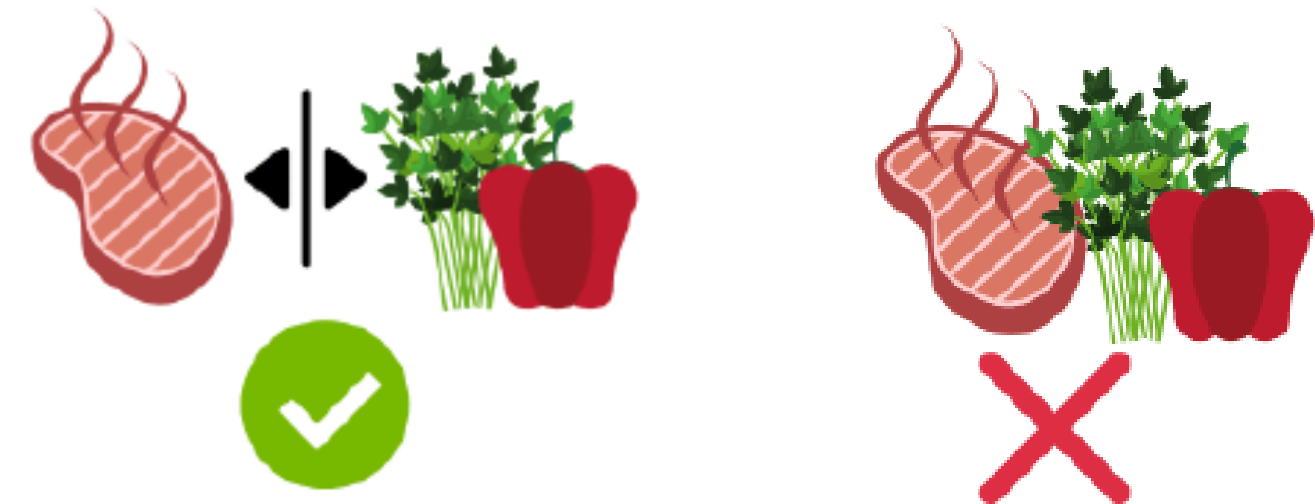

USE EQUIPOS Y UTENSILIOS DIFERENTES. COMO CUCHILLOS Y TABLAS DE PICAR PARA MANIPULAR CARNE, POLLO, PESCADO Y OTROS ALIMENTOS CRUDOS.

### CLAVE N°3

### COCINE COMPLETAMENTE

Cocine completamente los alimentos, especialmente carne, pollo, huevos y pescados.

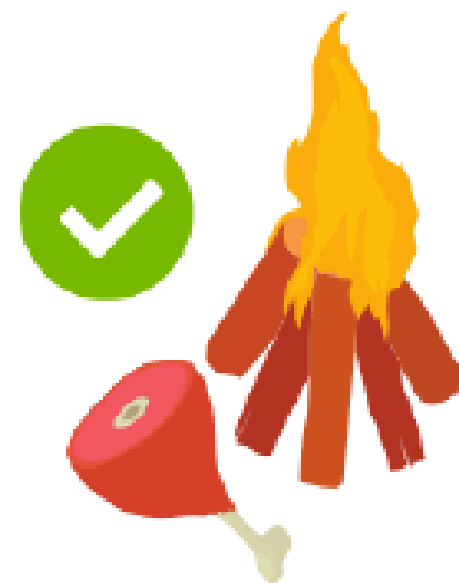

### CLAVE N°4

### MANTENGA LOS ALIMENTOS A TEMPERATURAS SEGURAS

- Proteja los alimentos y áreas de cocina de insectos, mascotas y de otros animales.
- Prepare los alimentos en pequeñas cantidades para reducir las sobras.

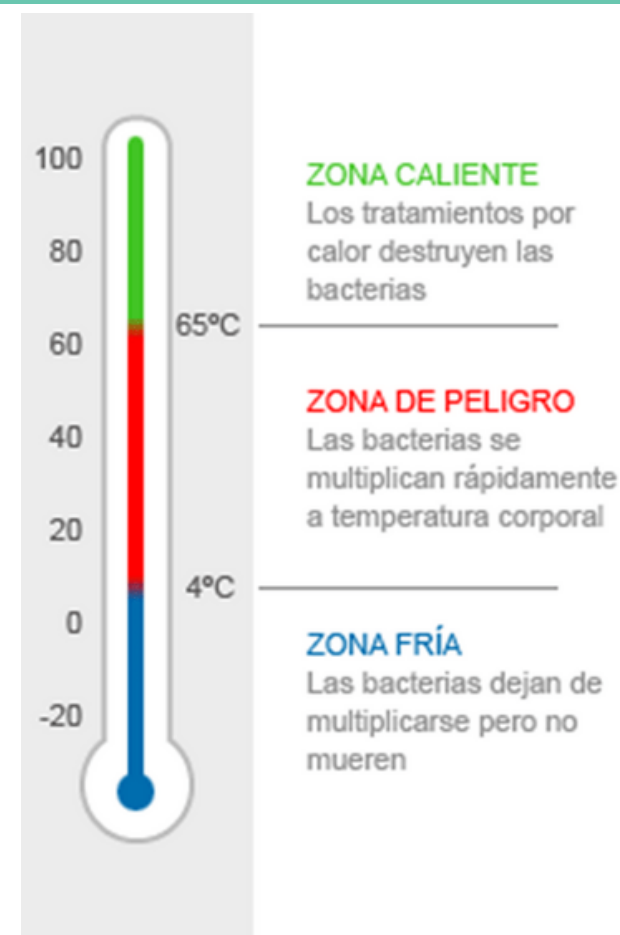

### CLAVE N°5

### USE AGUA Y MATERIAS PRIMAS SEGURAS

El agua sin tratar de ríos y canales no es segura, por ello es necesario:

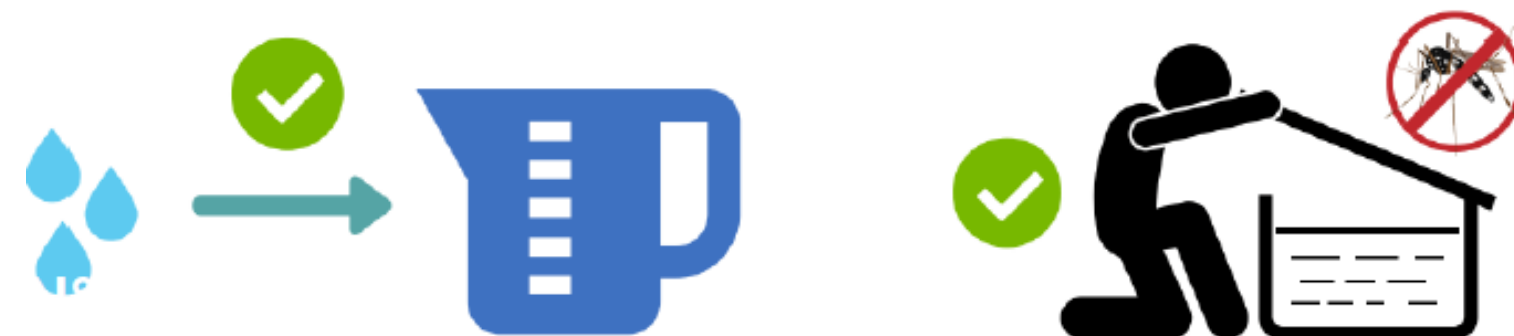

- Calentar el agua hasta que hierva. Luego añadir 3 y 5 gotas de cloro a 1 litro de agua o elimine físicamente los patógenos con un filtro apropiado.
- Recubrir los depósitos y otros receptáculos o con mallas previene la reproducción de los mosquitos vectores del dengue.

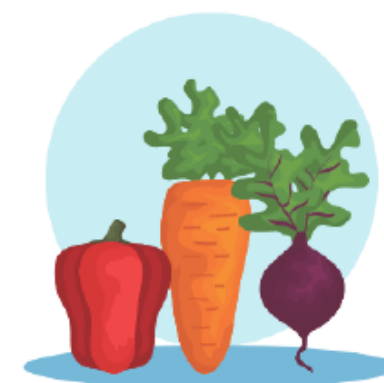

**LAVE LAS FRUTAS Y VERDURAS, ESPECIALMENTE SI SE COMEN CRUDAS.**
